# Supplementary material for: Nitrile-assisted oxidation over oxidative-annulation: Pd-catalyzed α,β-dehydrogenation of α-cinnamyl β-keto nitriles
Source: Royal Society of Chemistry journal article supplement (doi:10.1039/c7ob00912g), 2017-01-01

**Supporting Information II**

**Nitrile-Assisted Oxidation over Oxidative-Annulation: Palladium-Catalyzed Oxidation of  $\alpha$ -Cinnamyl  $\beta$ -Keto Nitriles**

Rajender Nallagonda, Reddy Rajasekhar Reddy and Prasanta Ghorai\*

Department of Chemistry, Indian Institute of Science Education and Research Bhopal, Bhour, Bhopal-462066, India.

*E-mail:* [pghorai@iiserb.ac.in](mailto:pghorai@iiserb.ac.in)

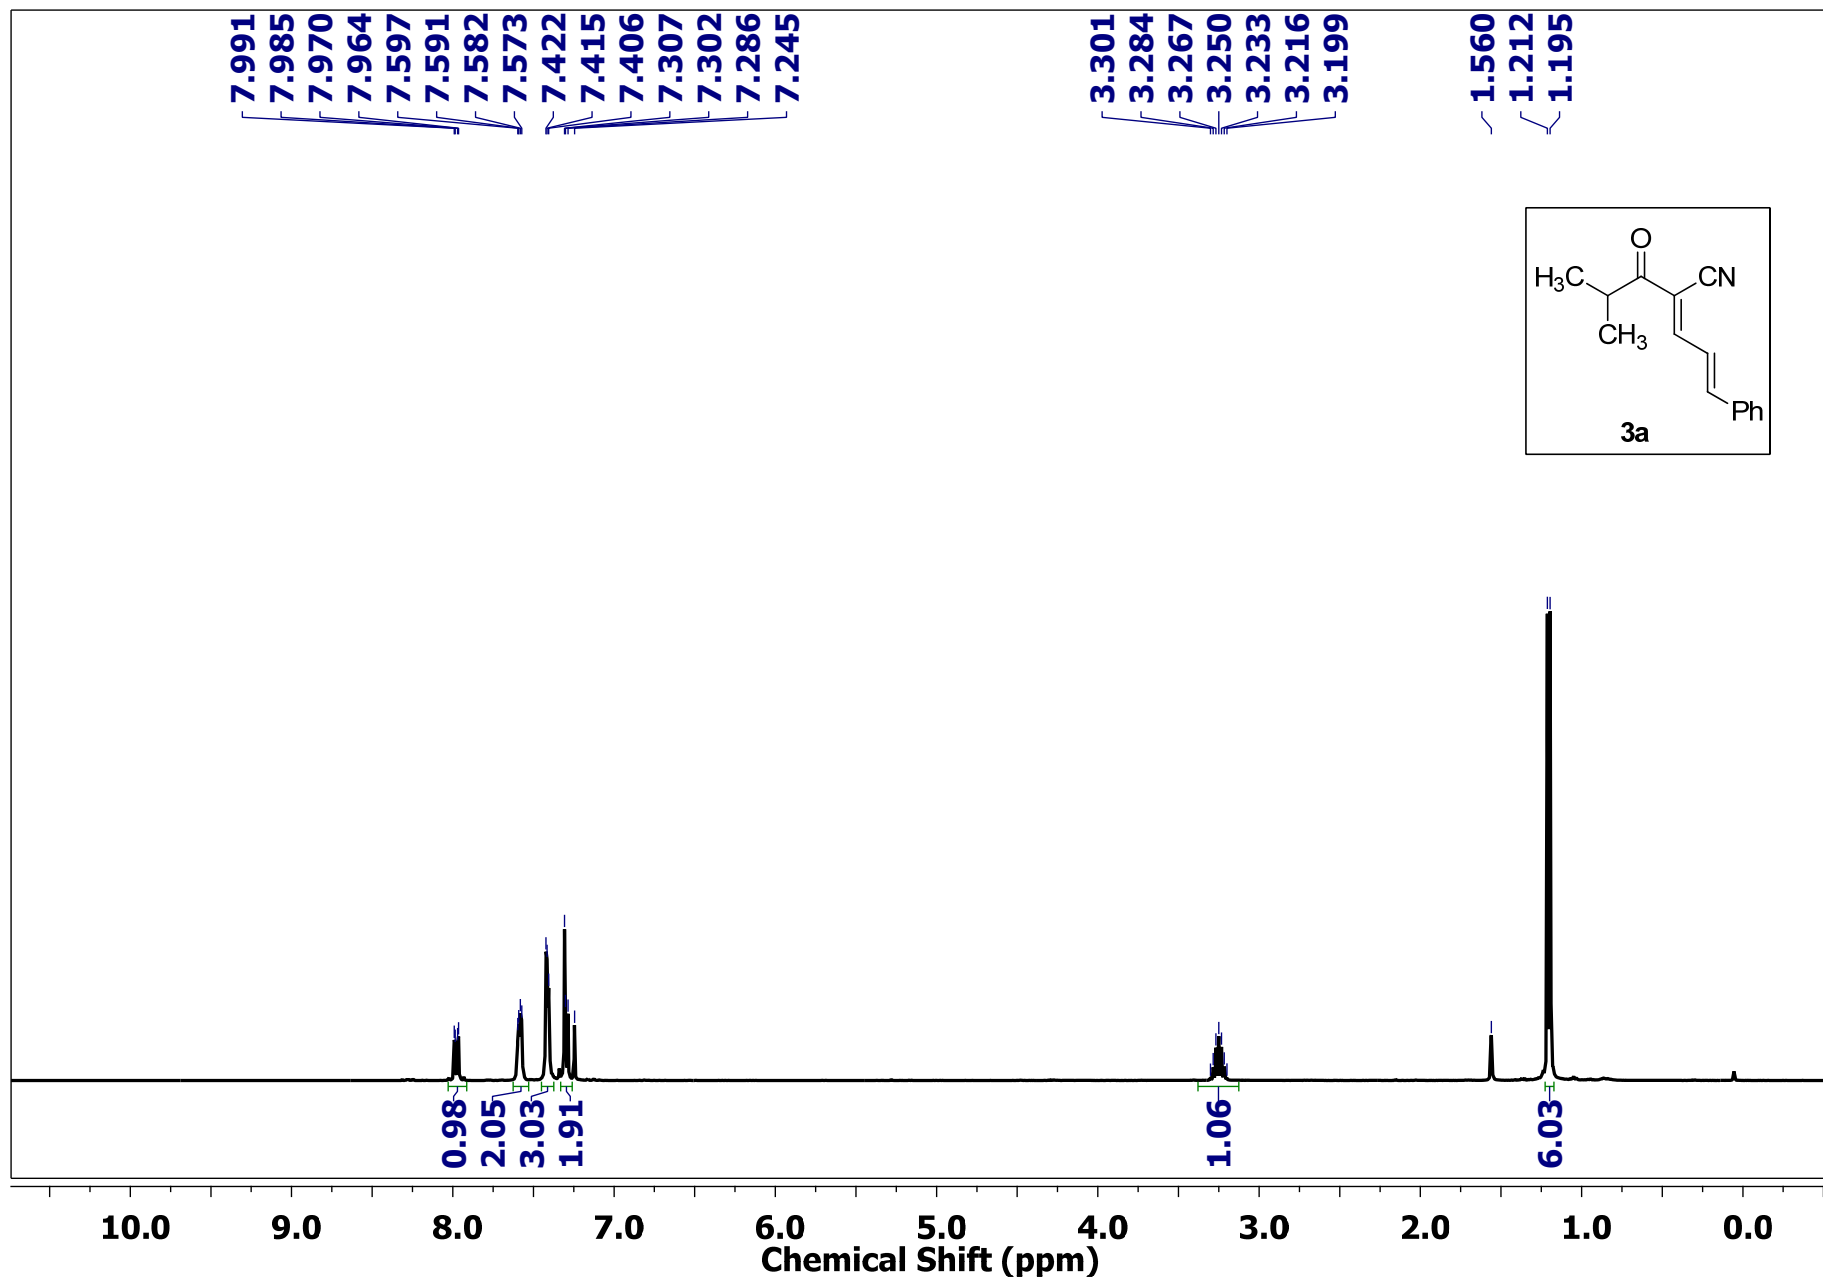

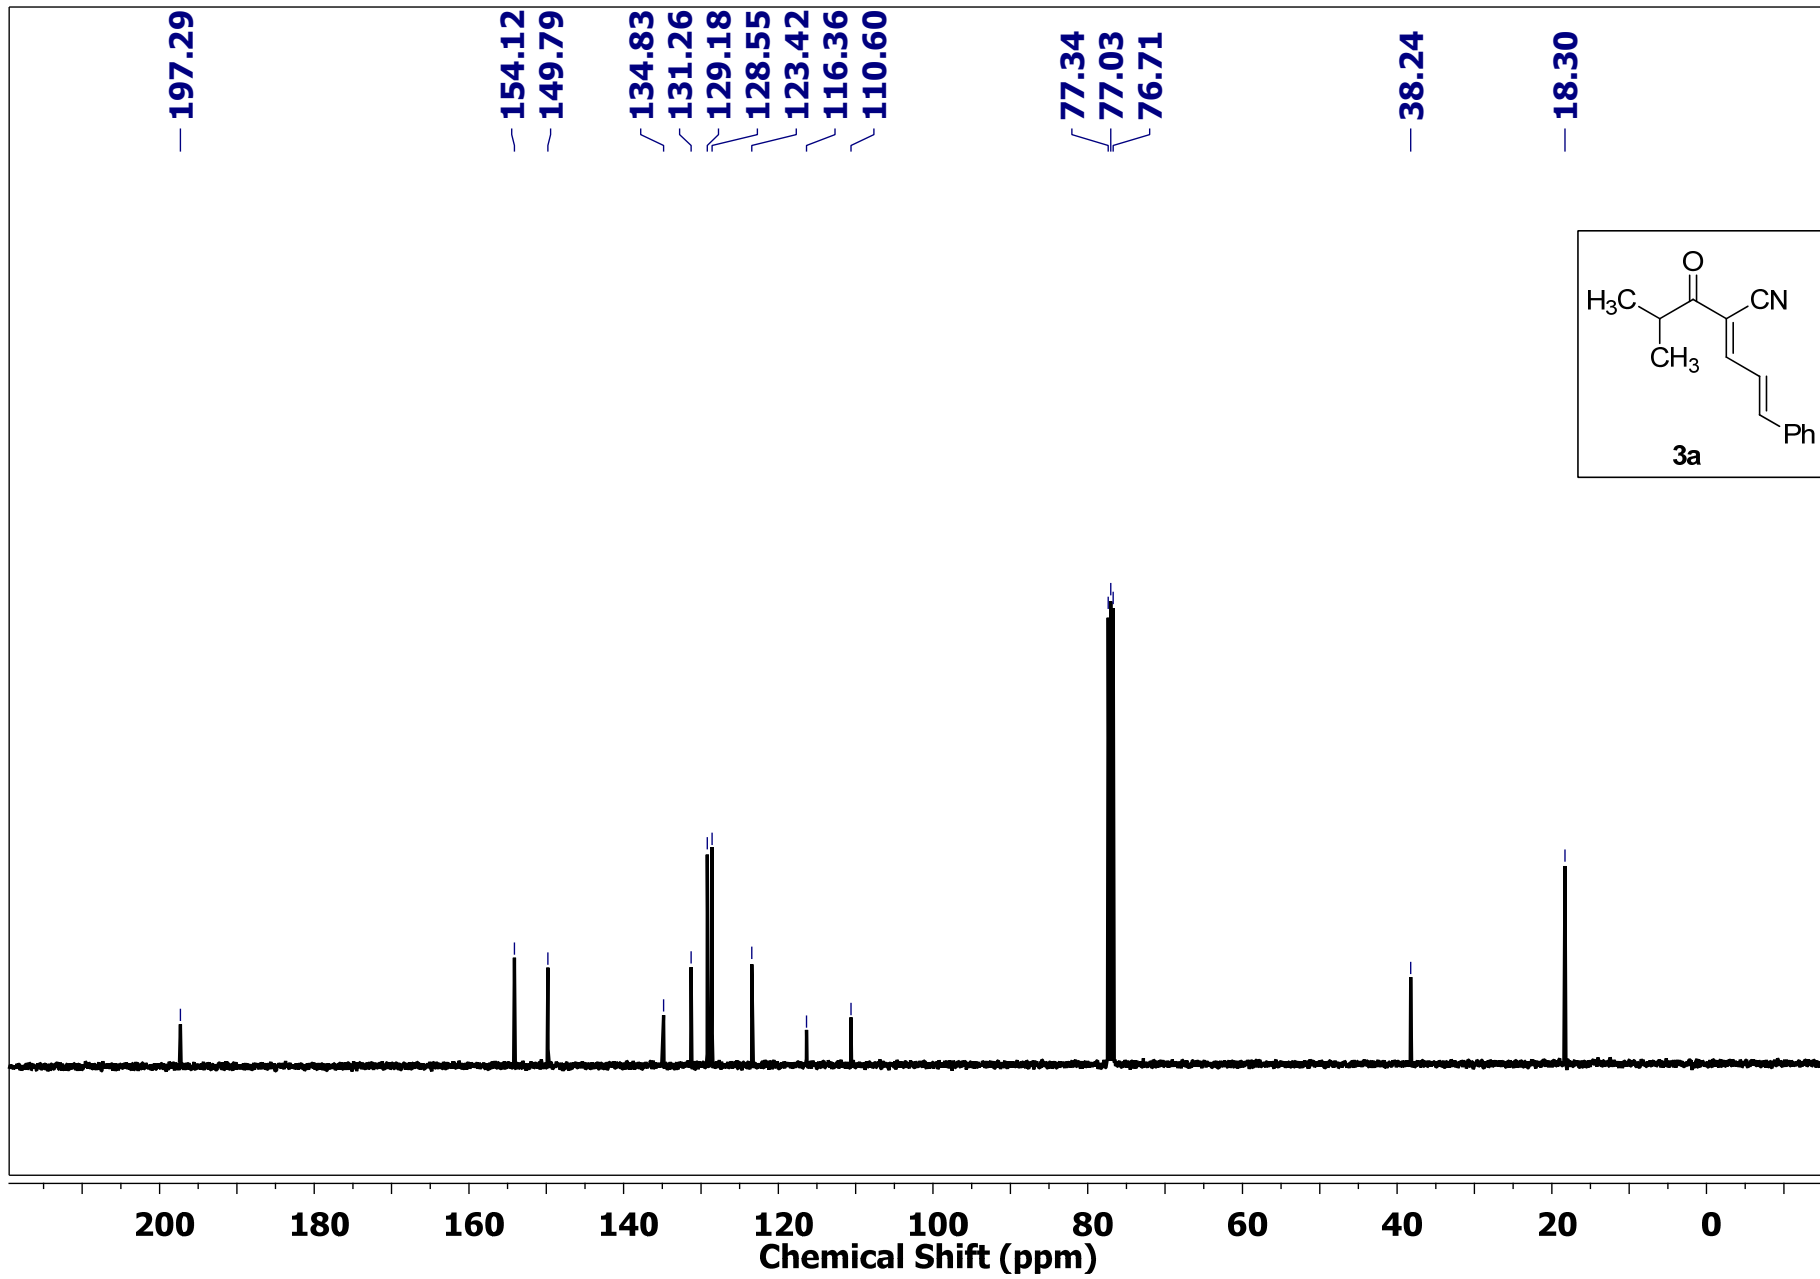

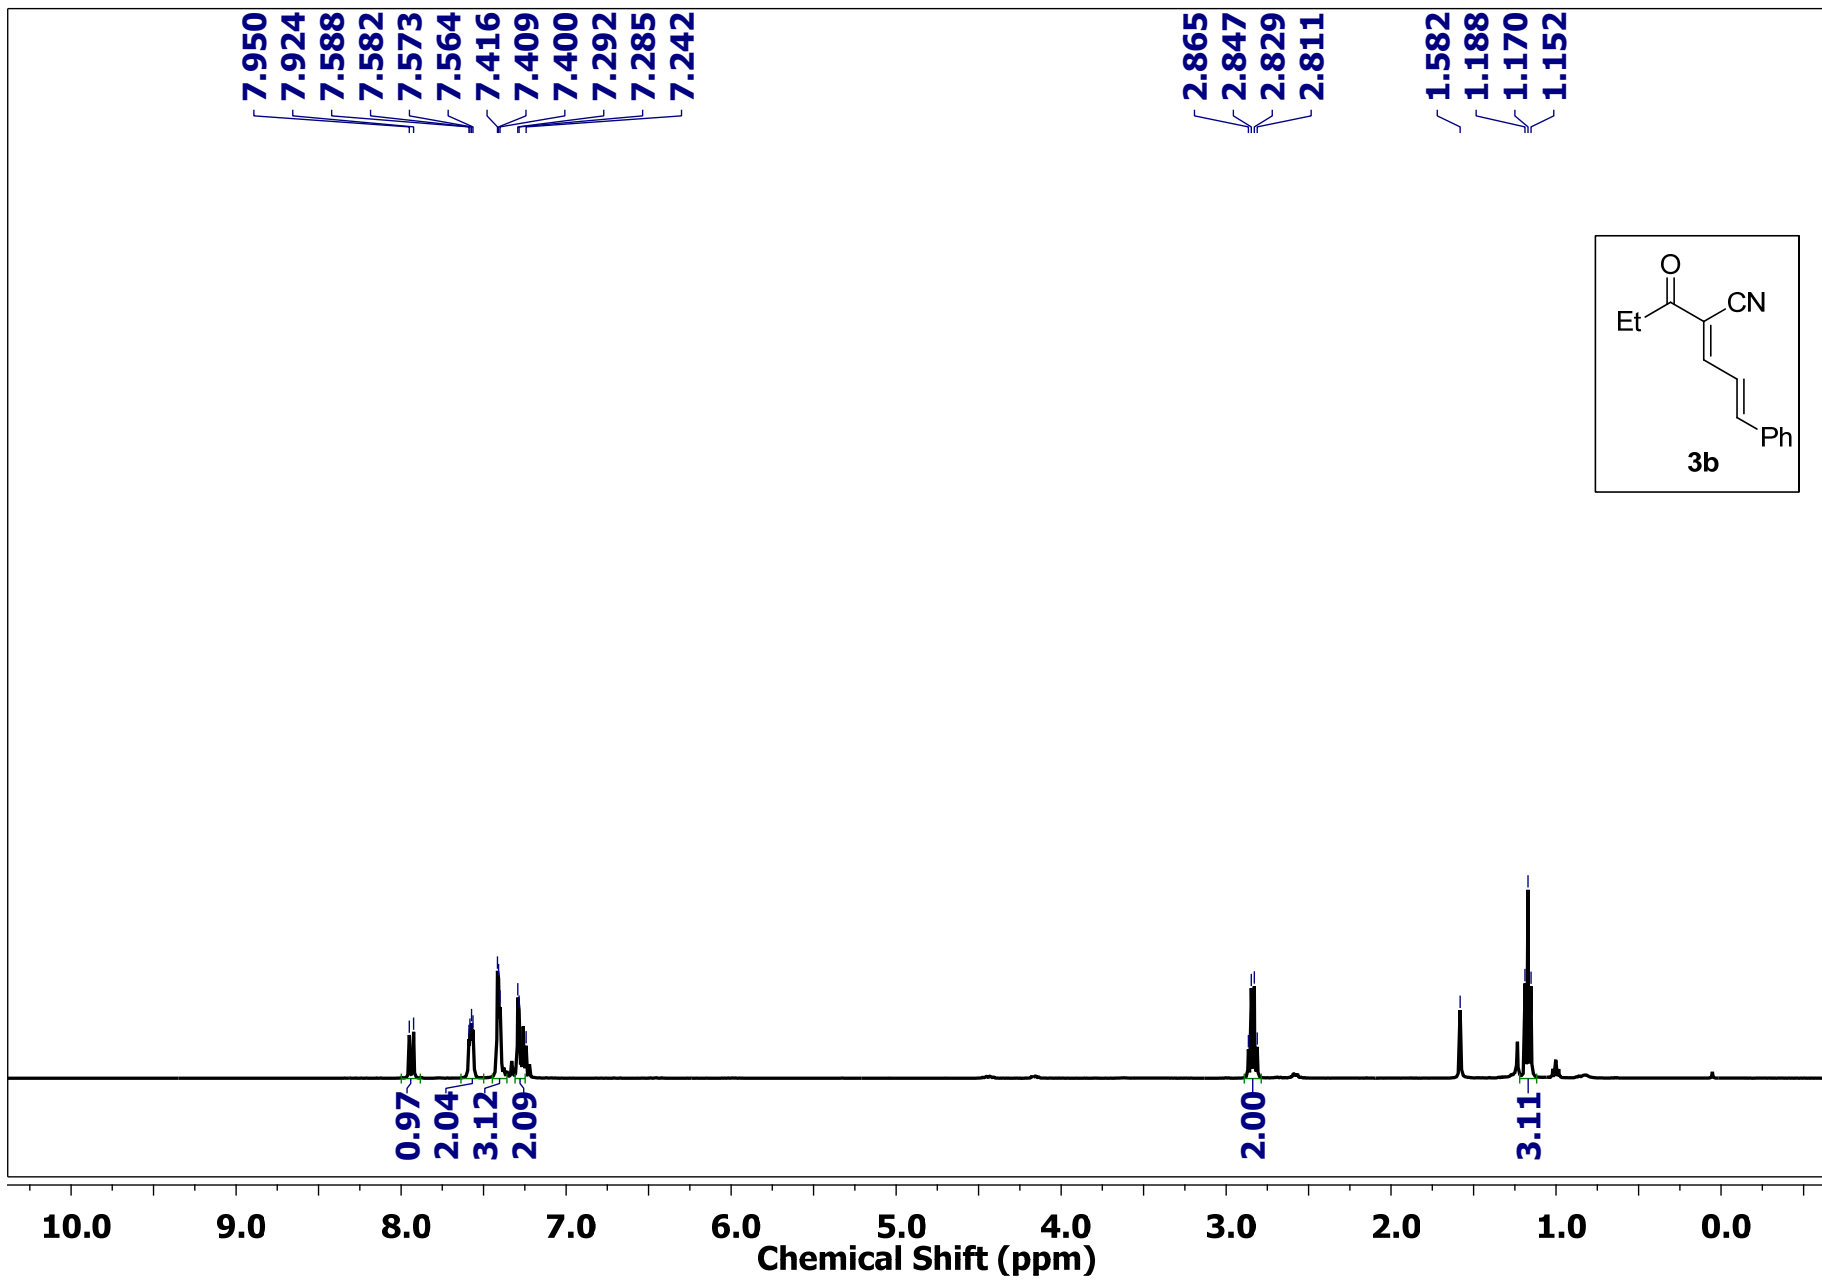

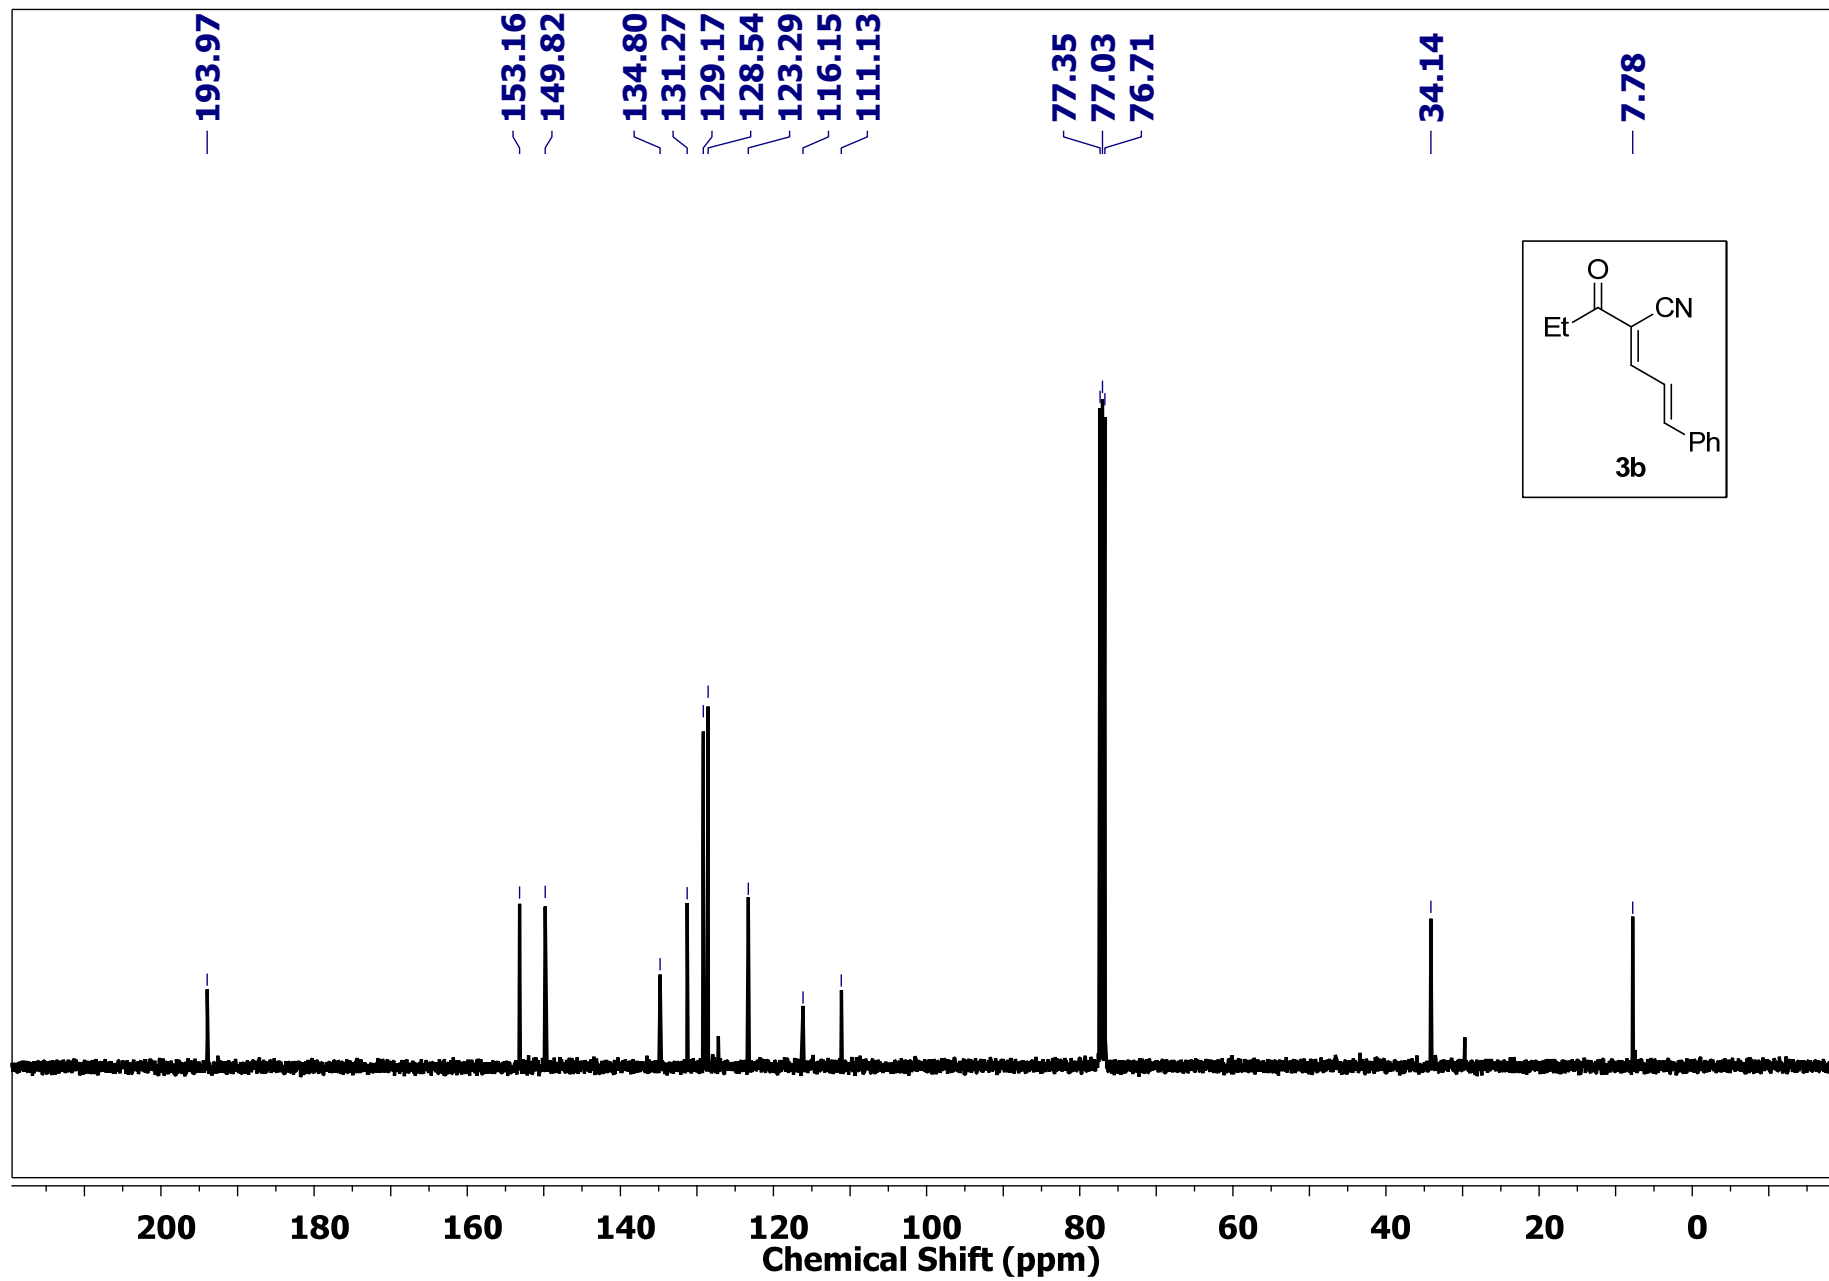

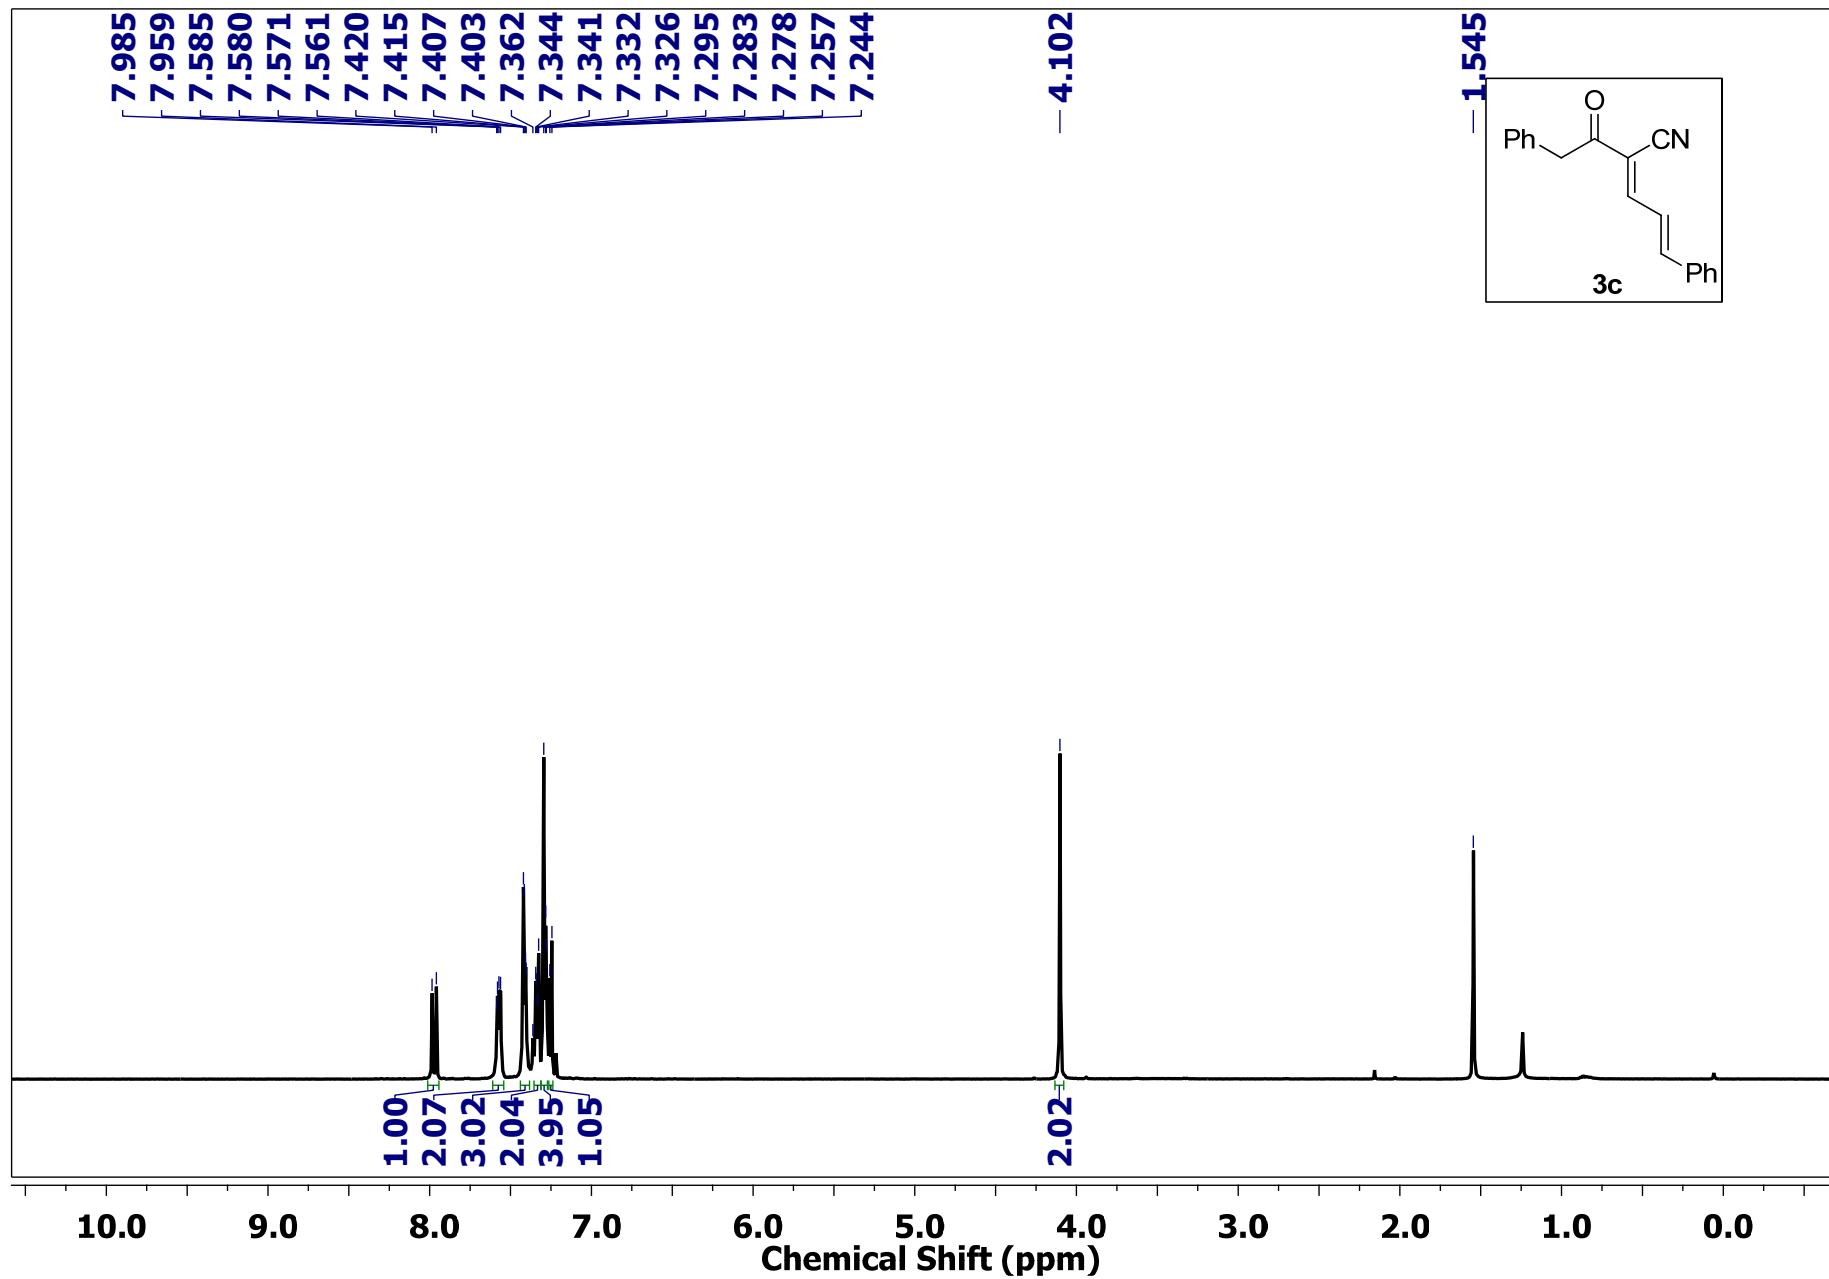

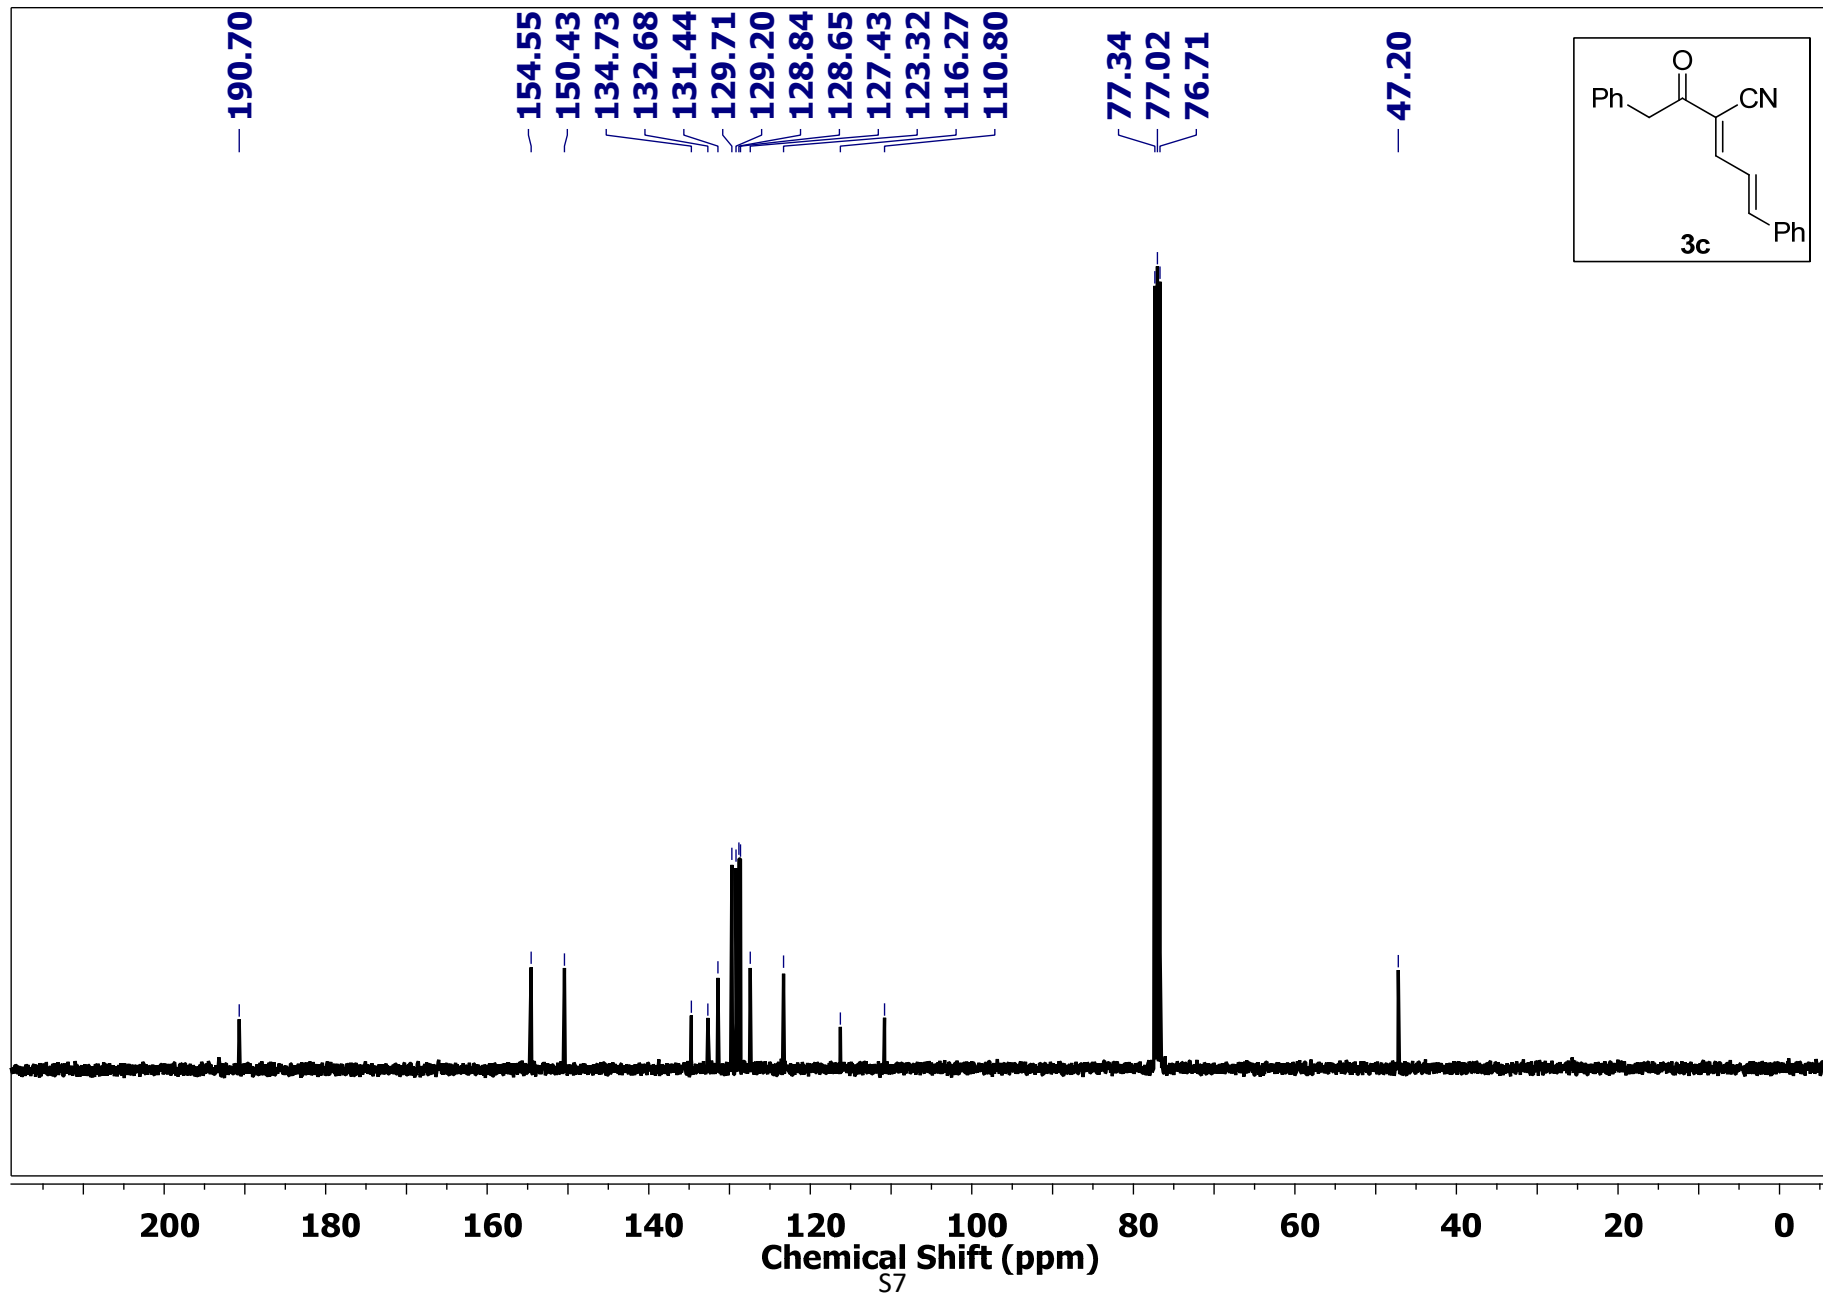

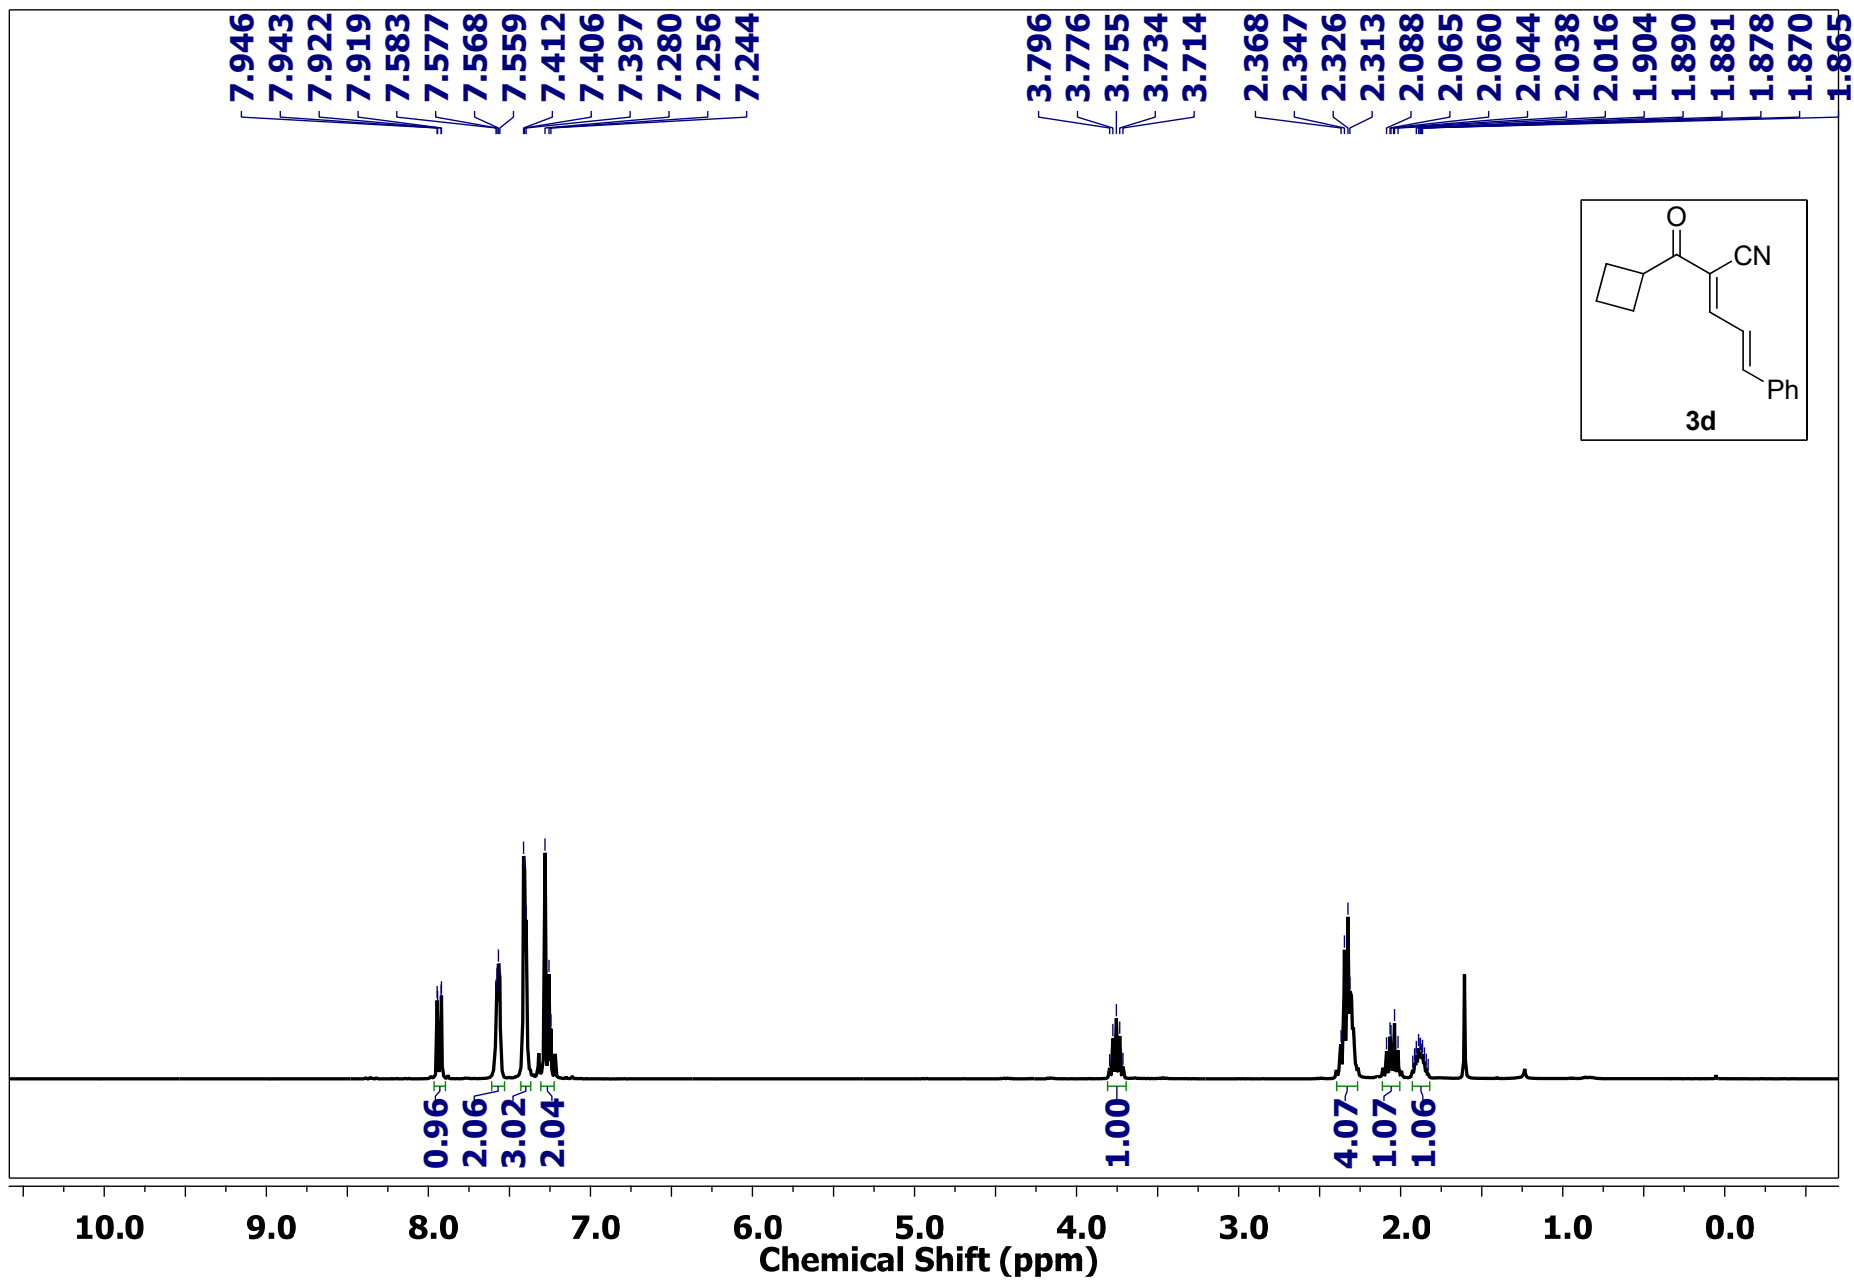



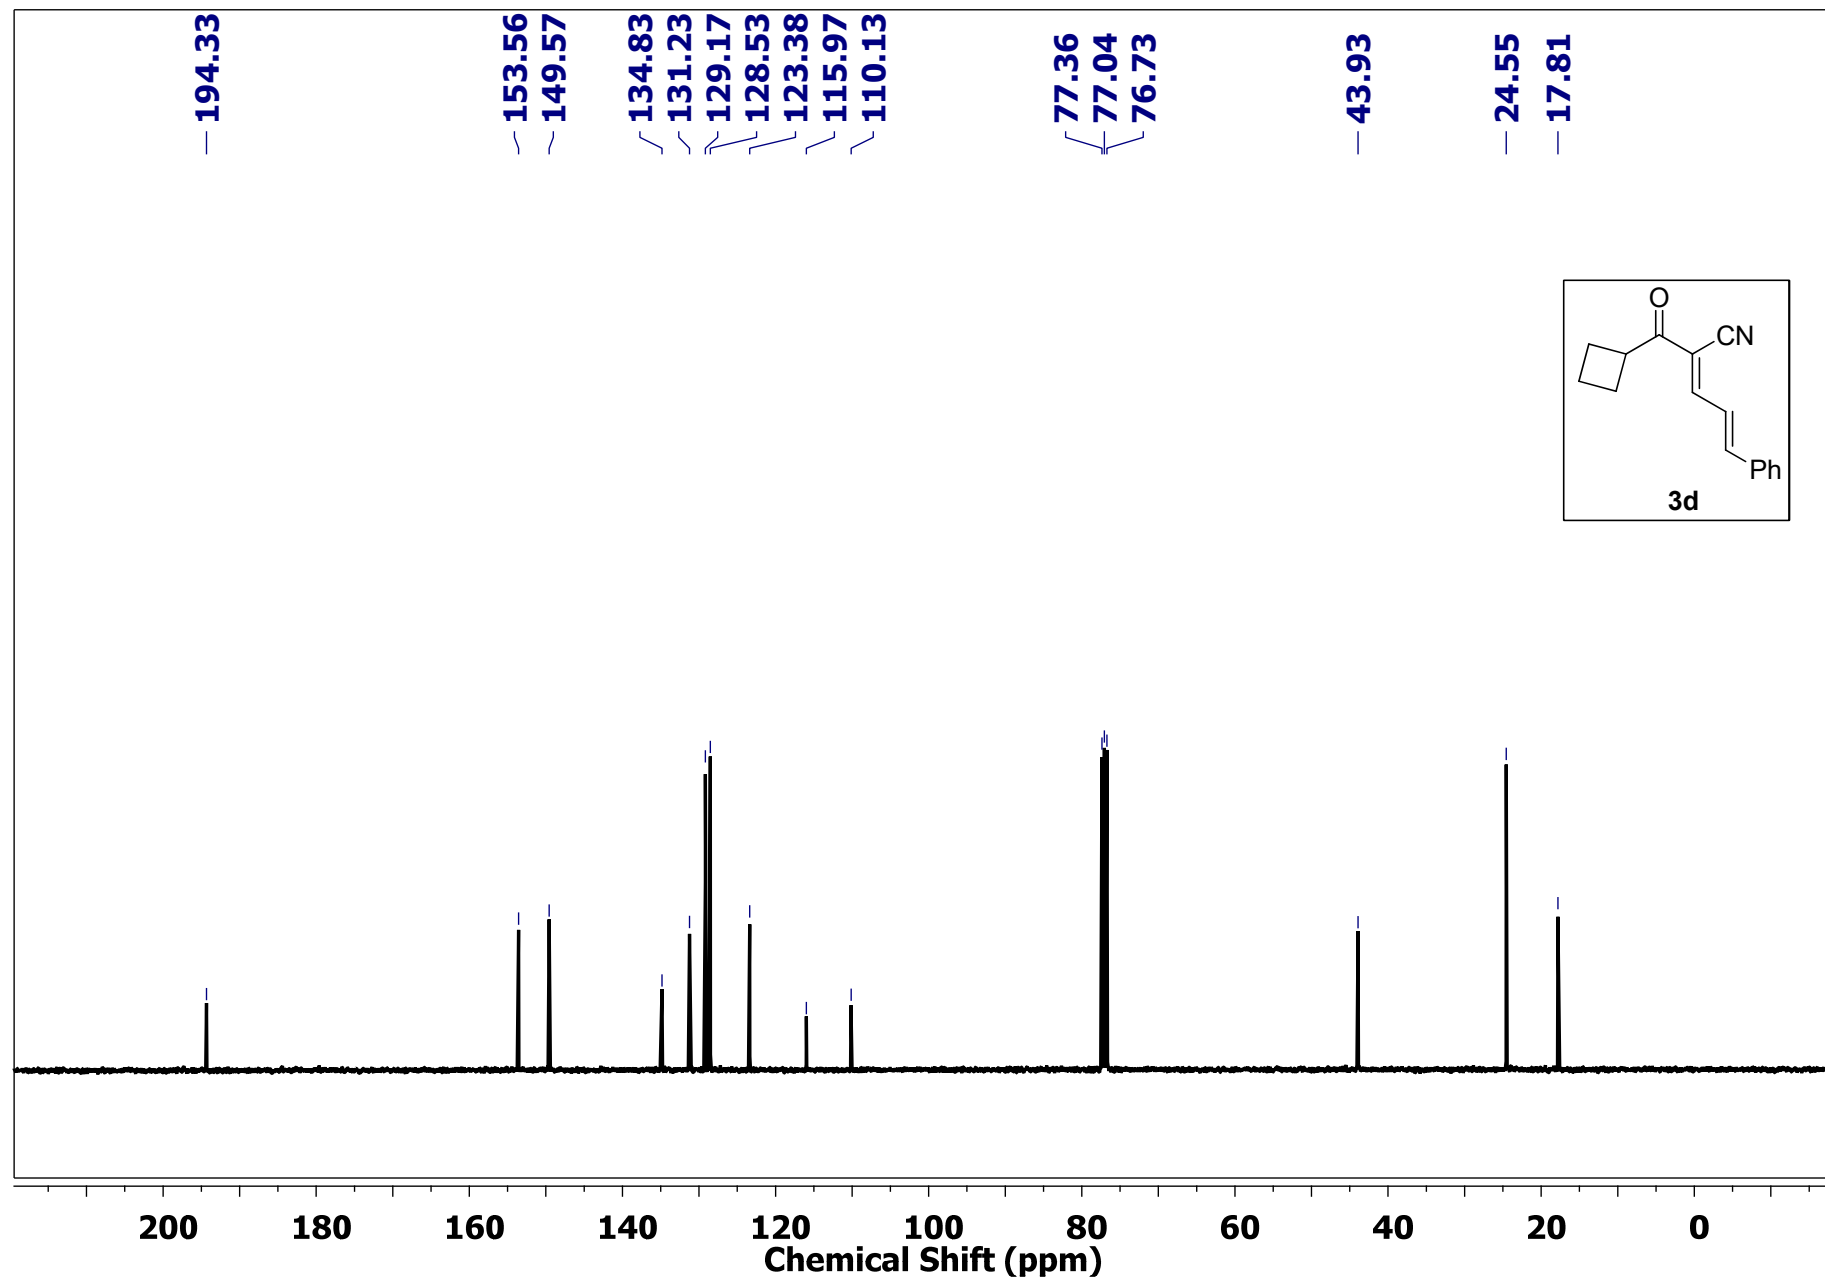

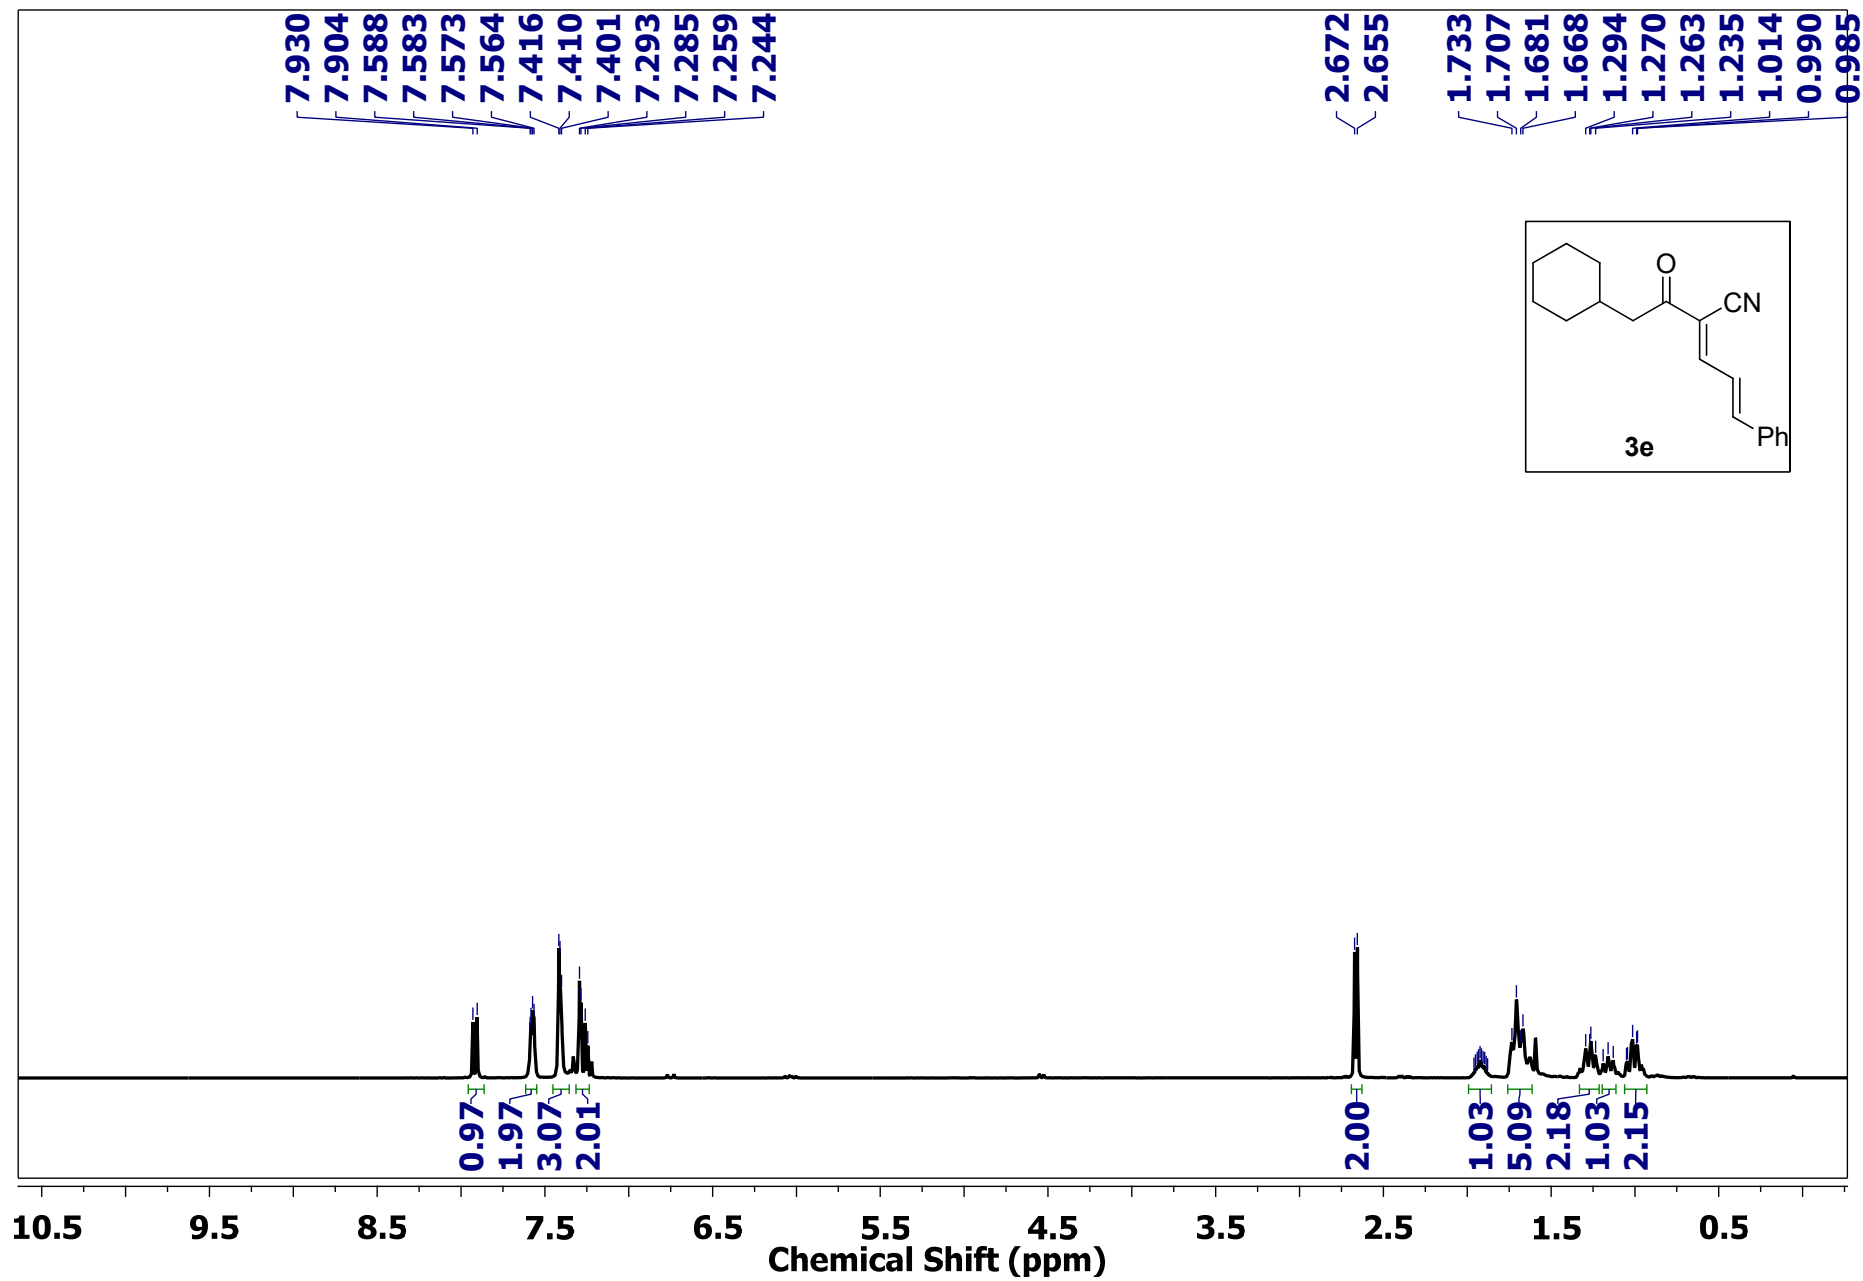

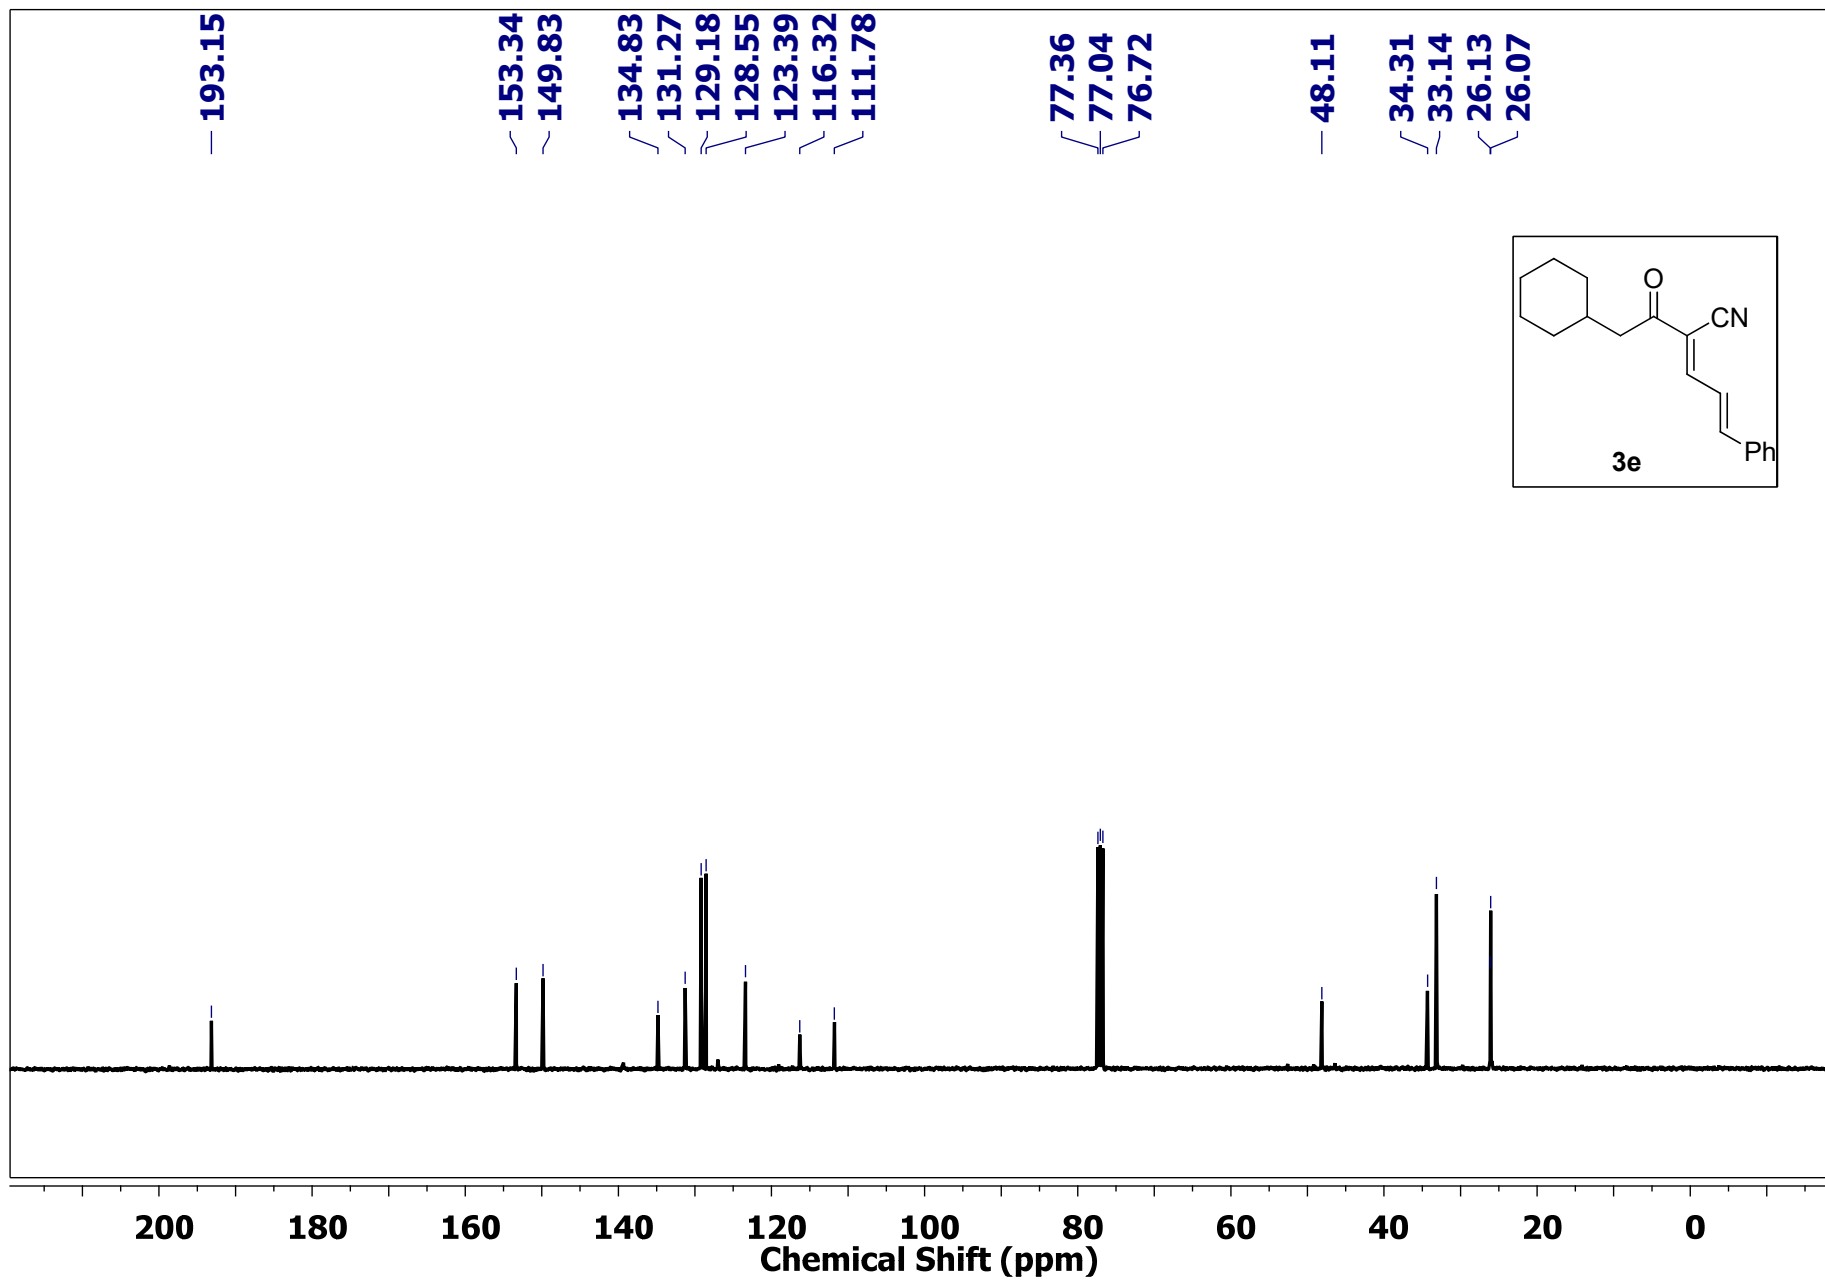

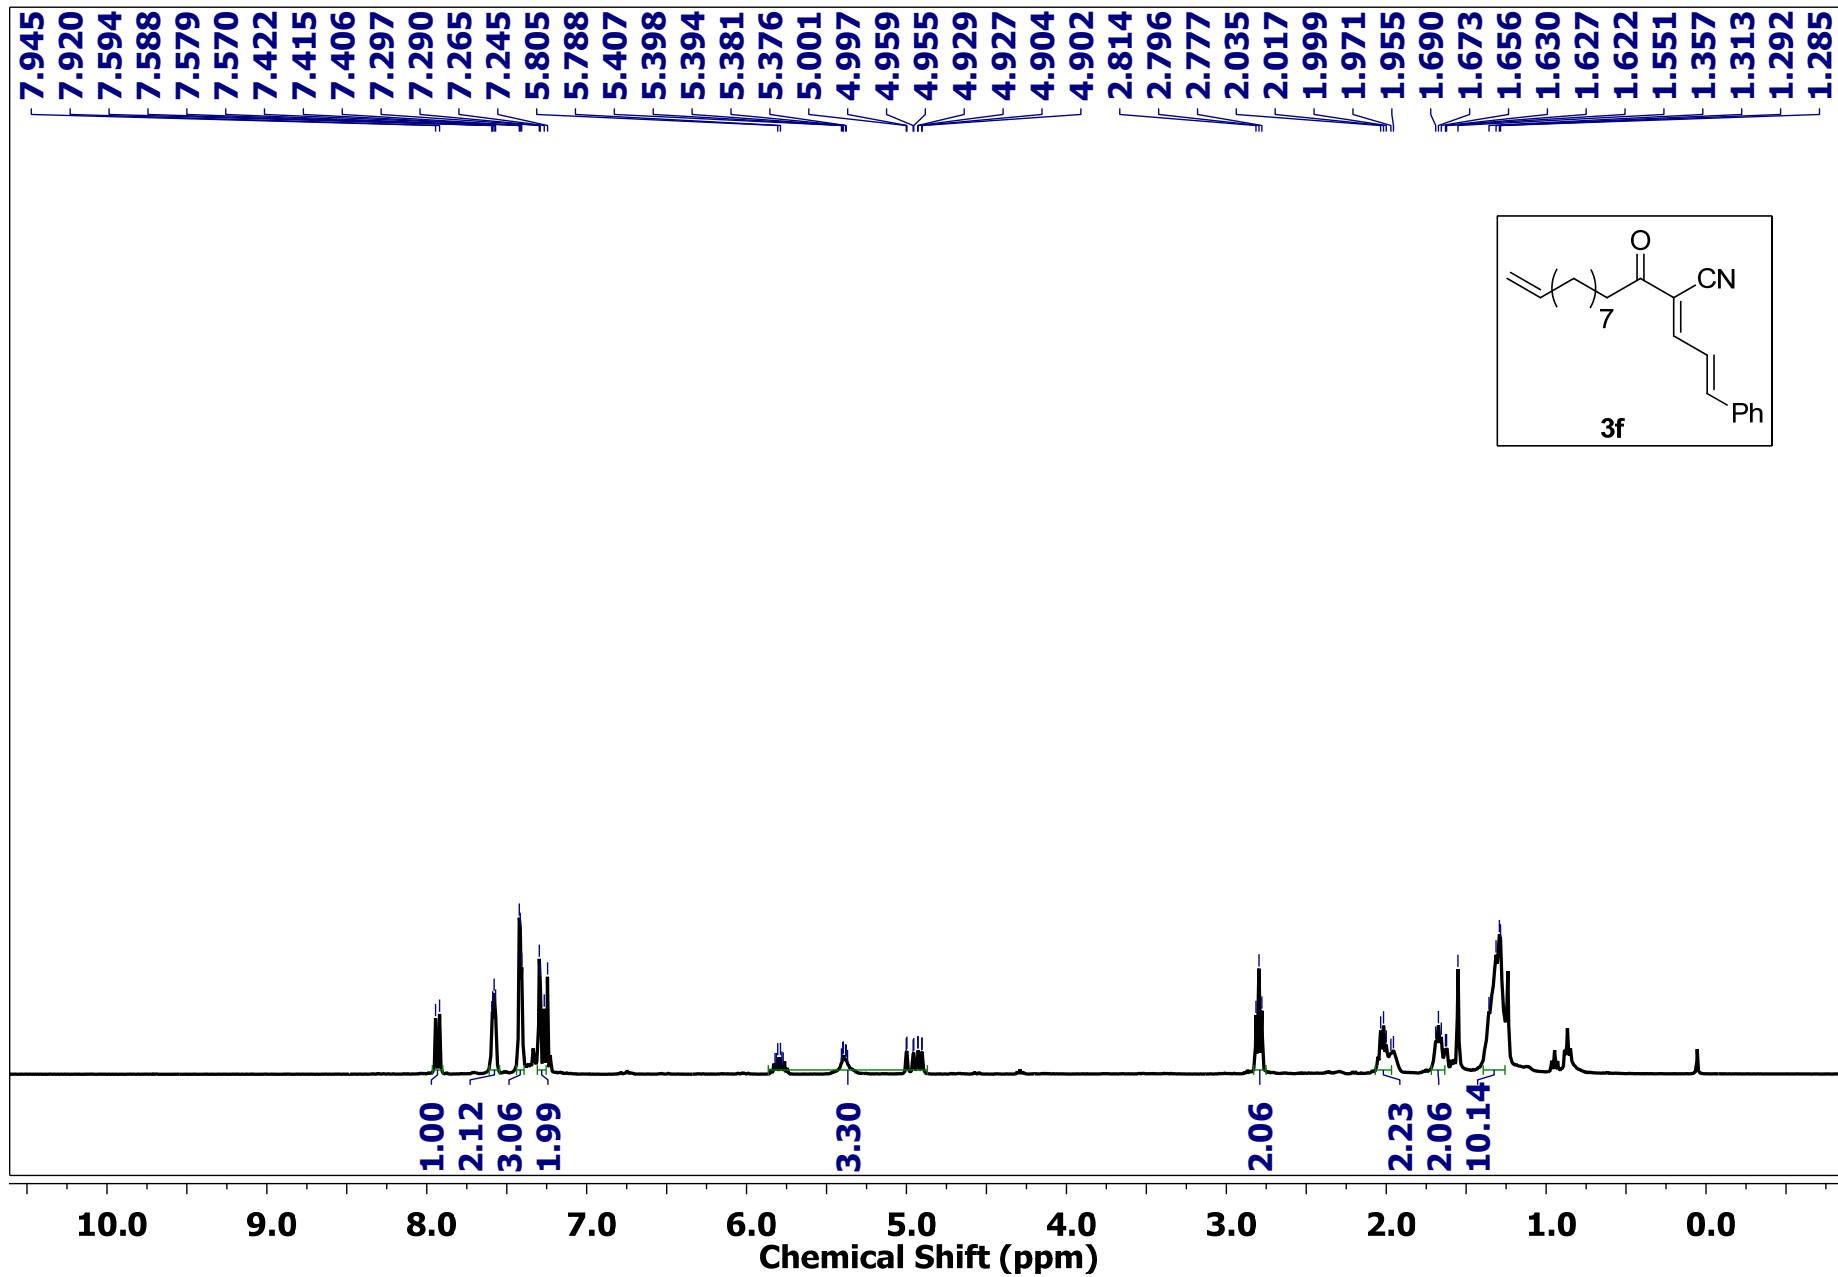

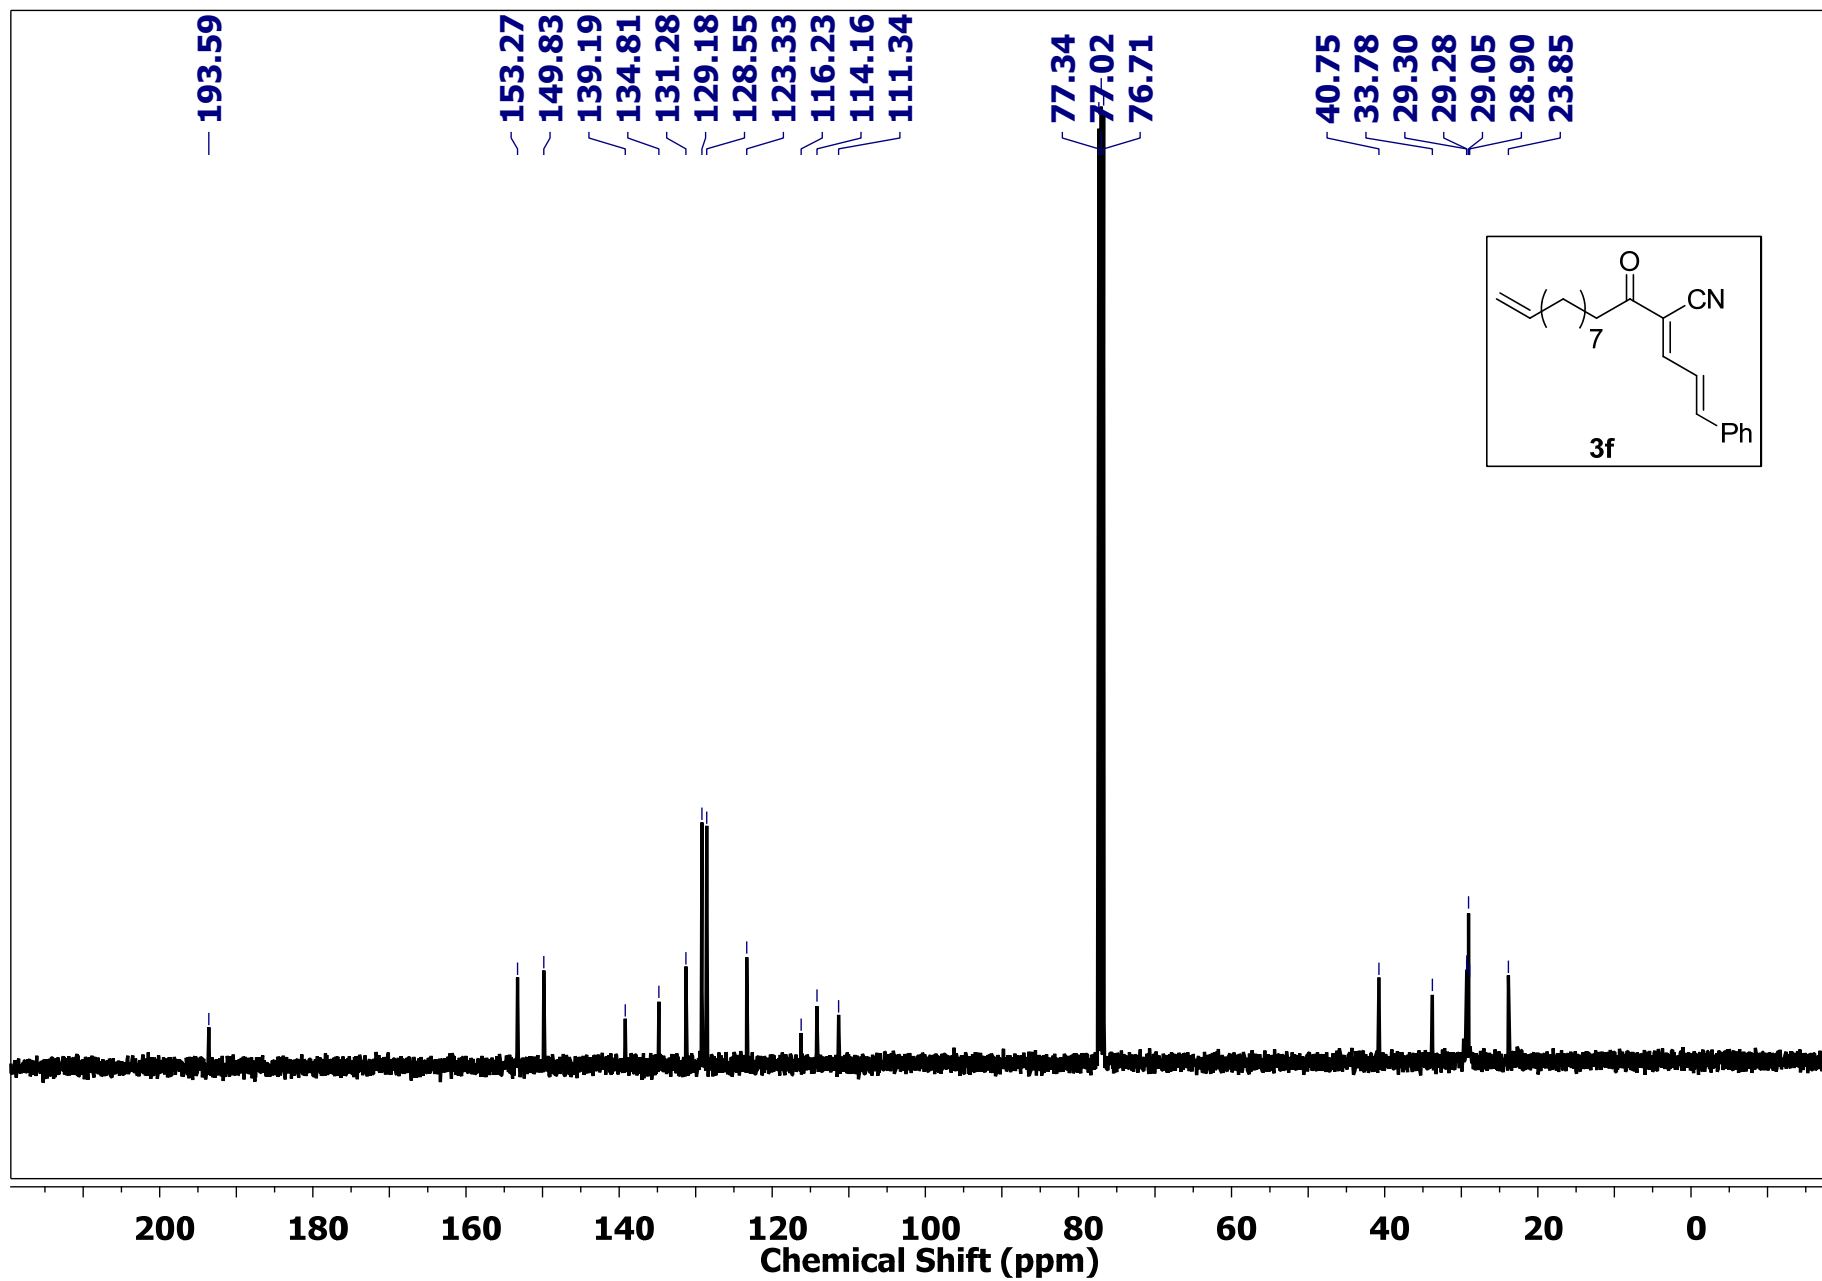

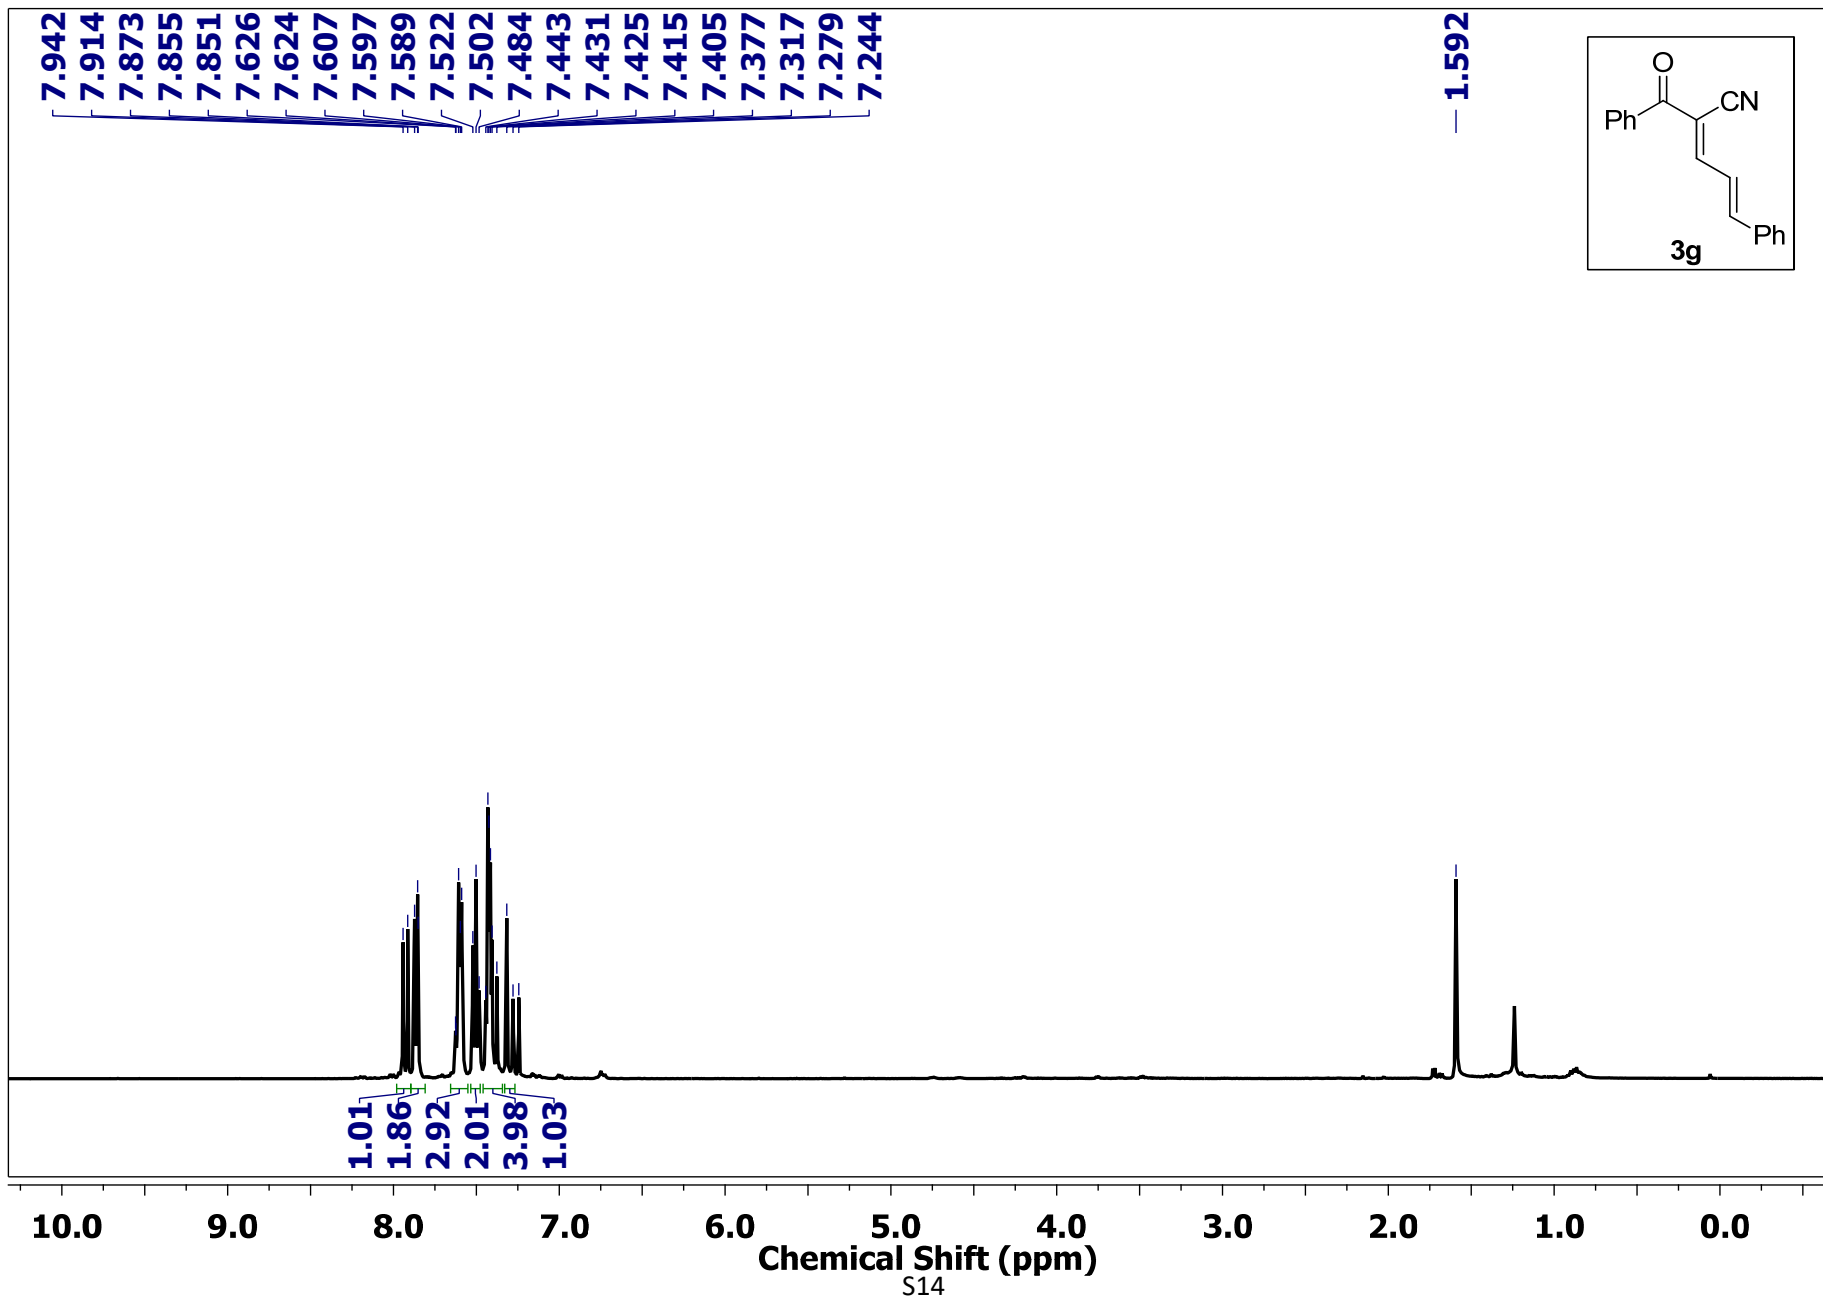

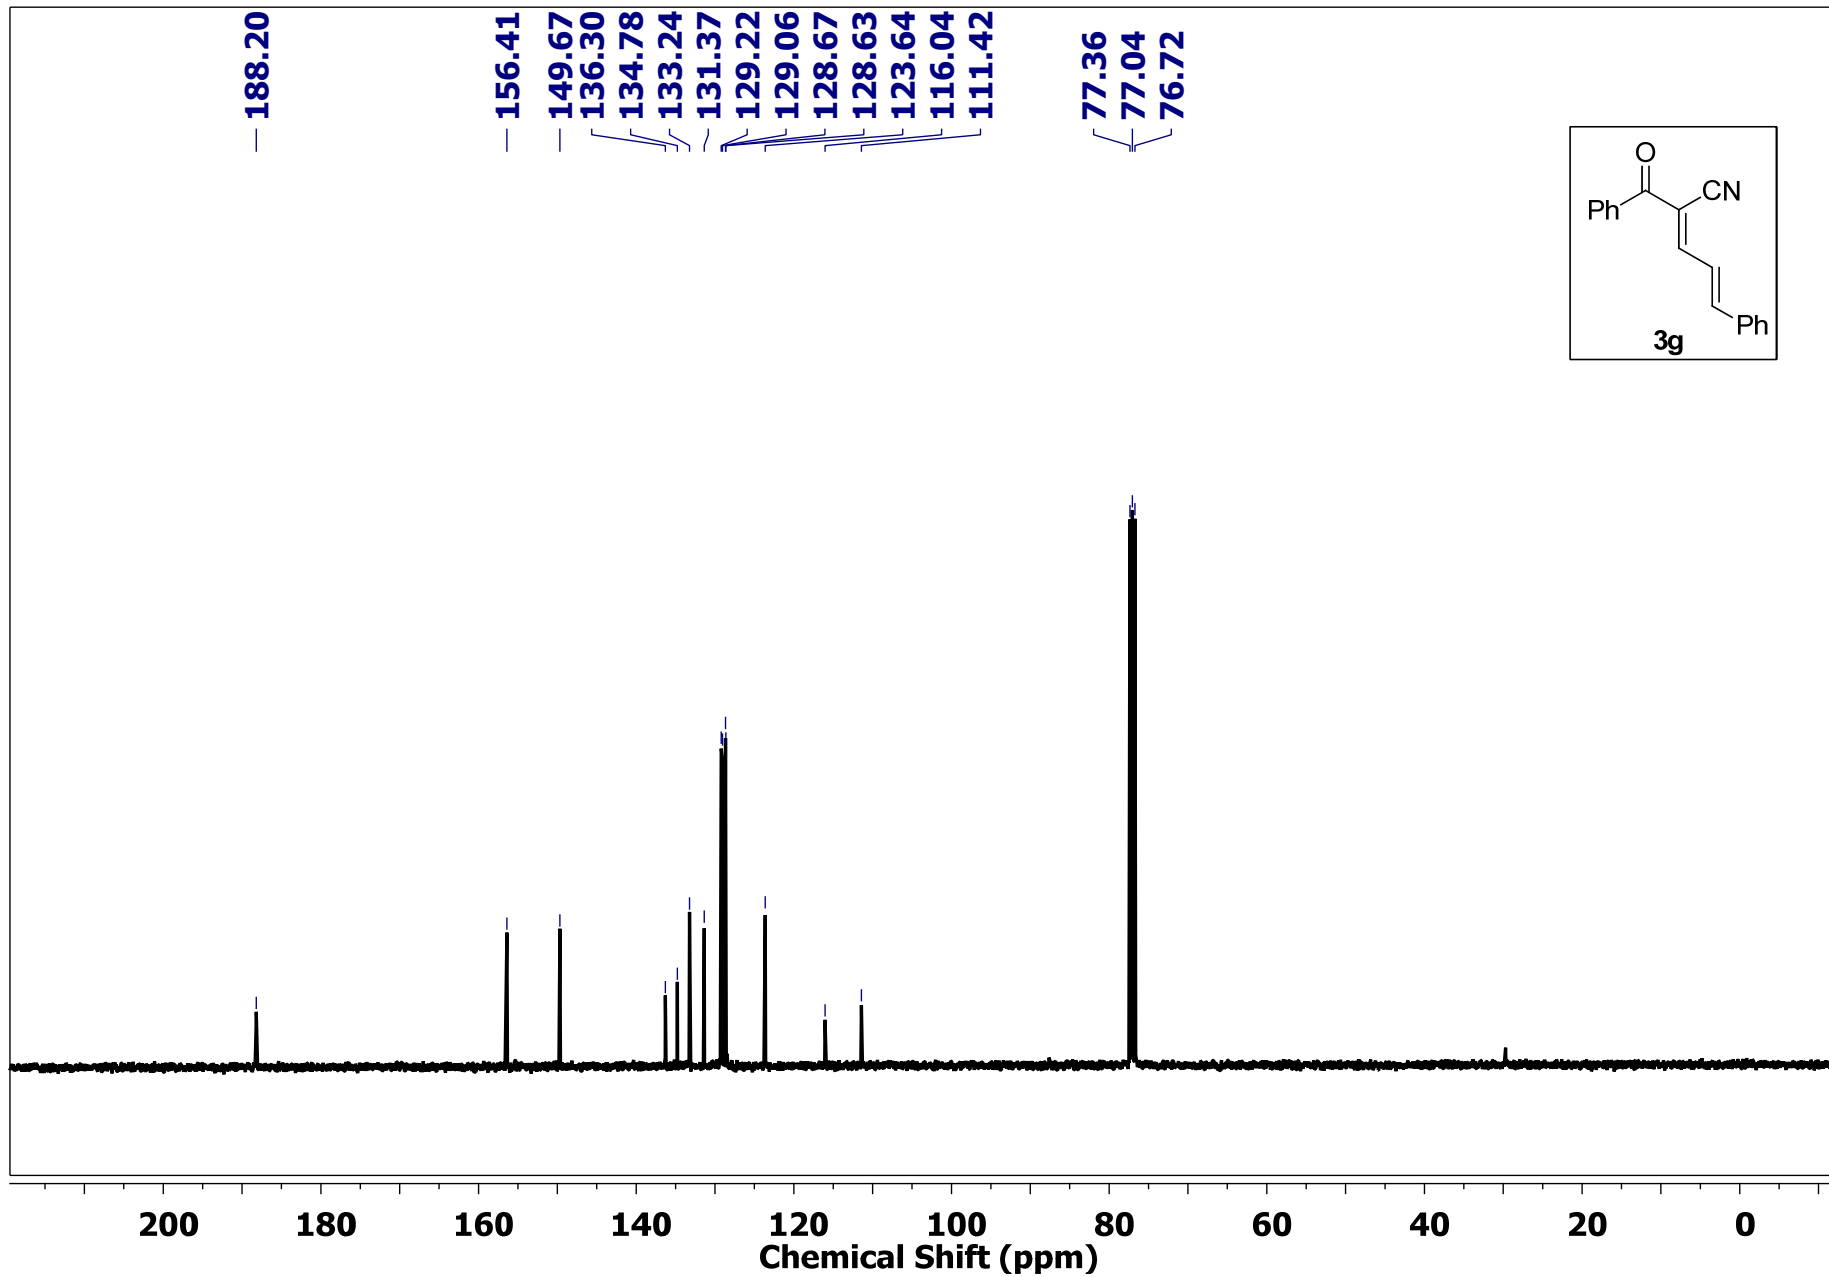

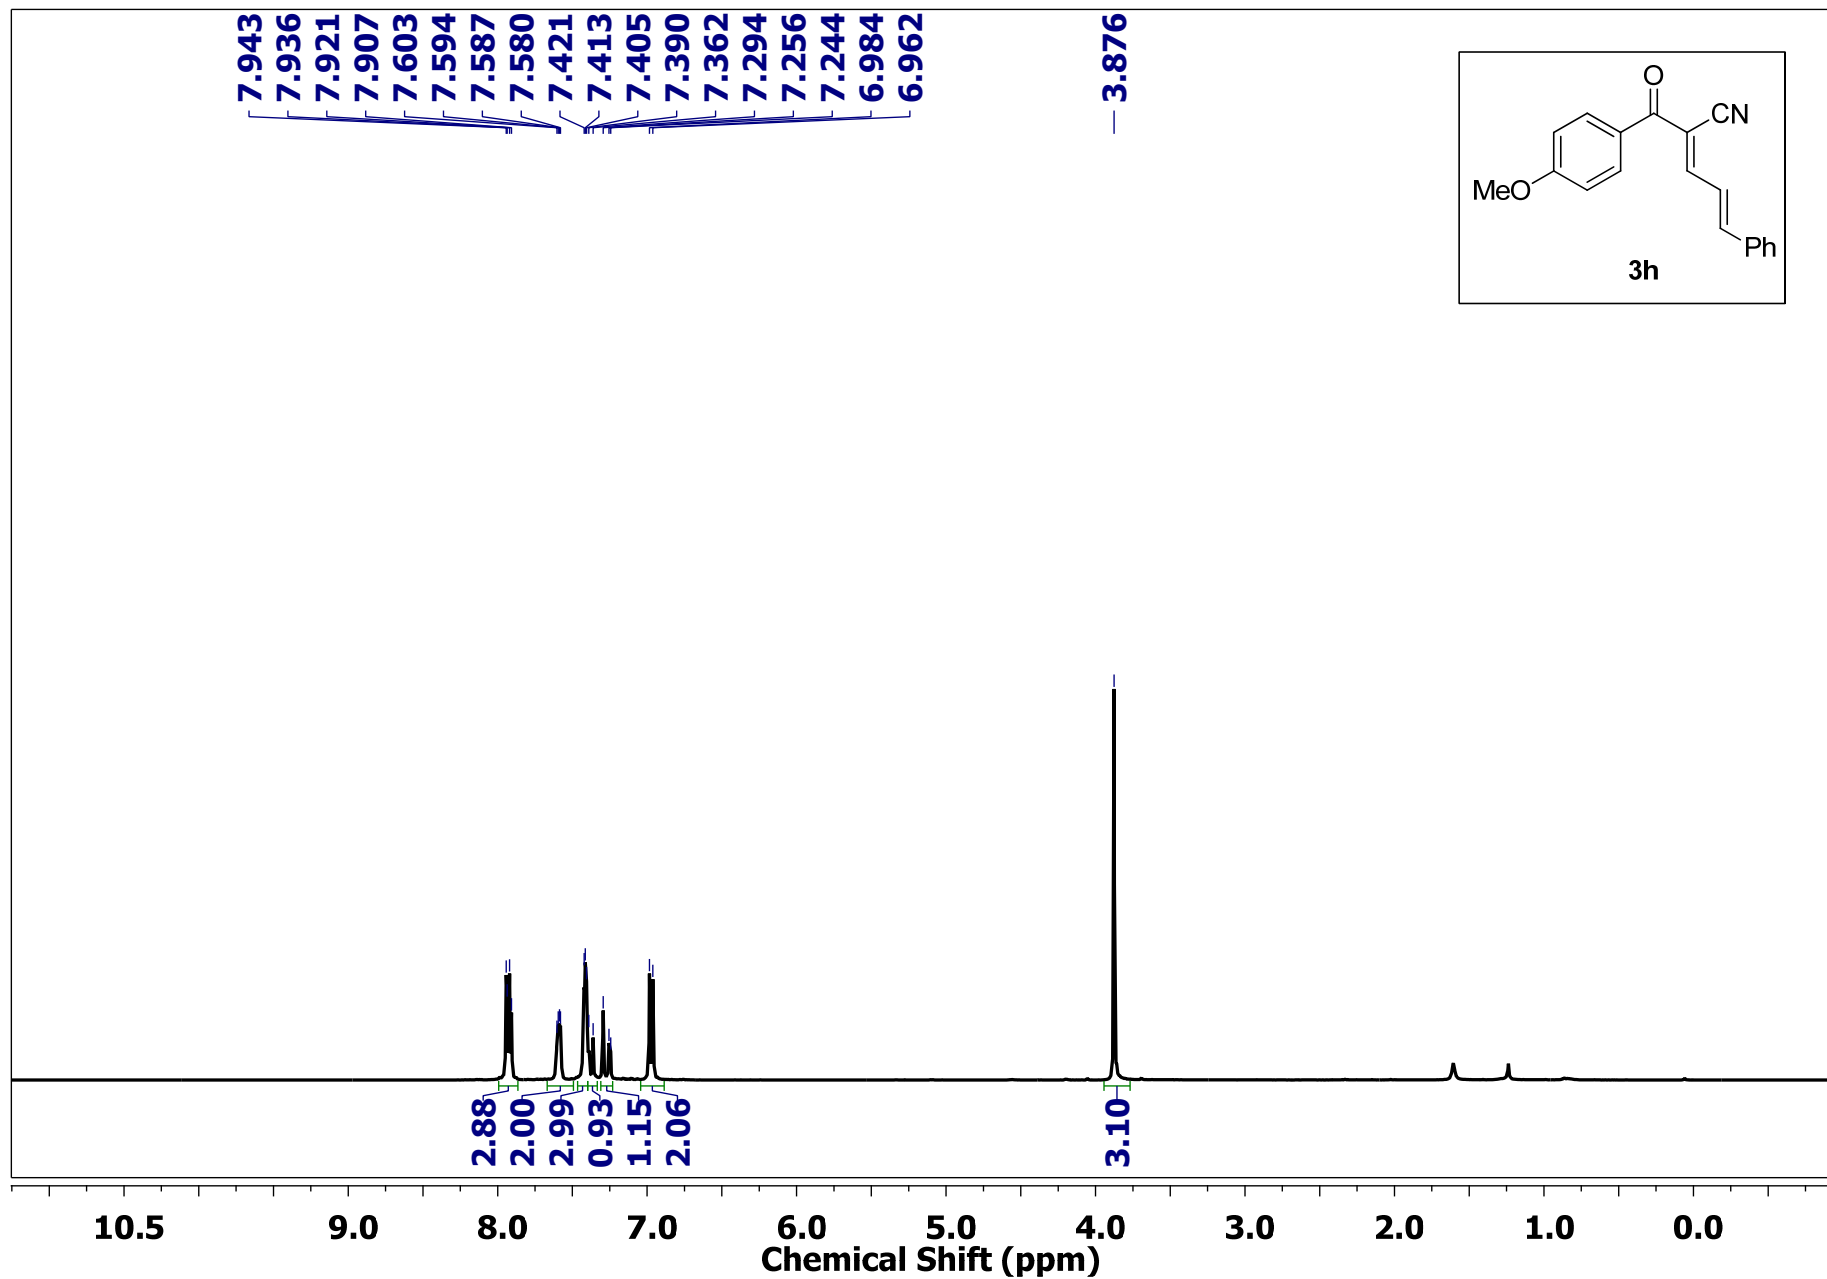



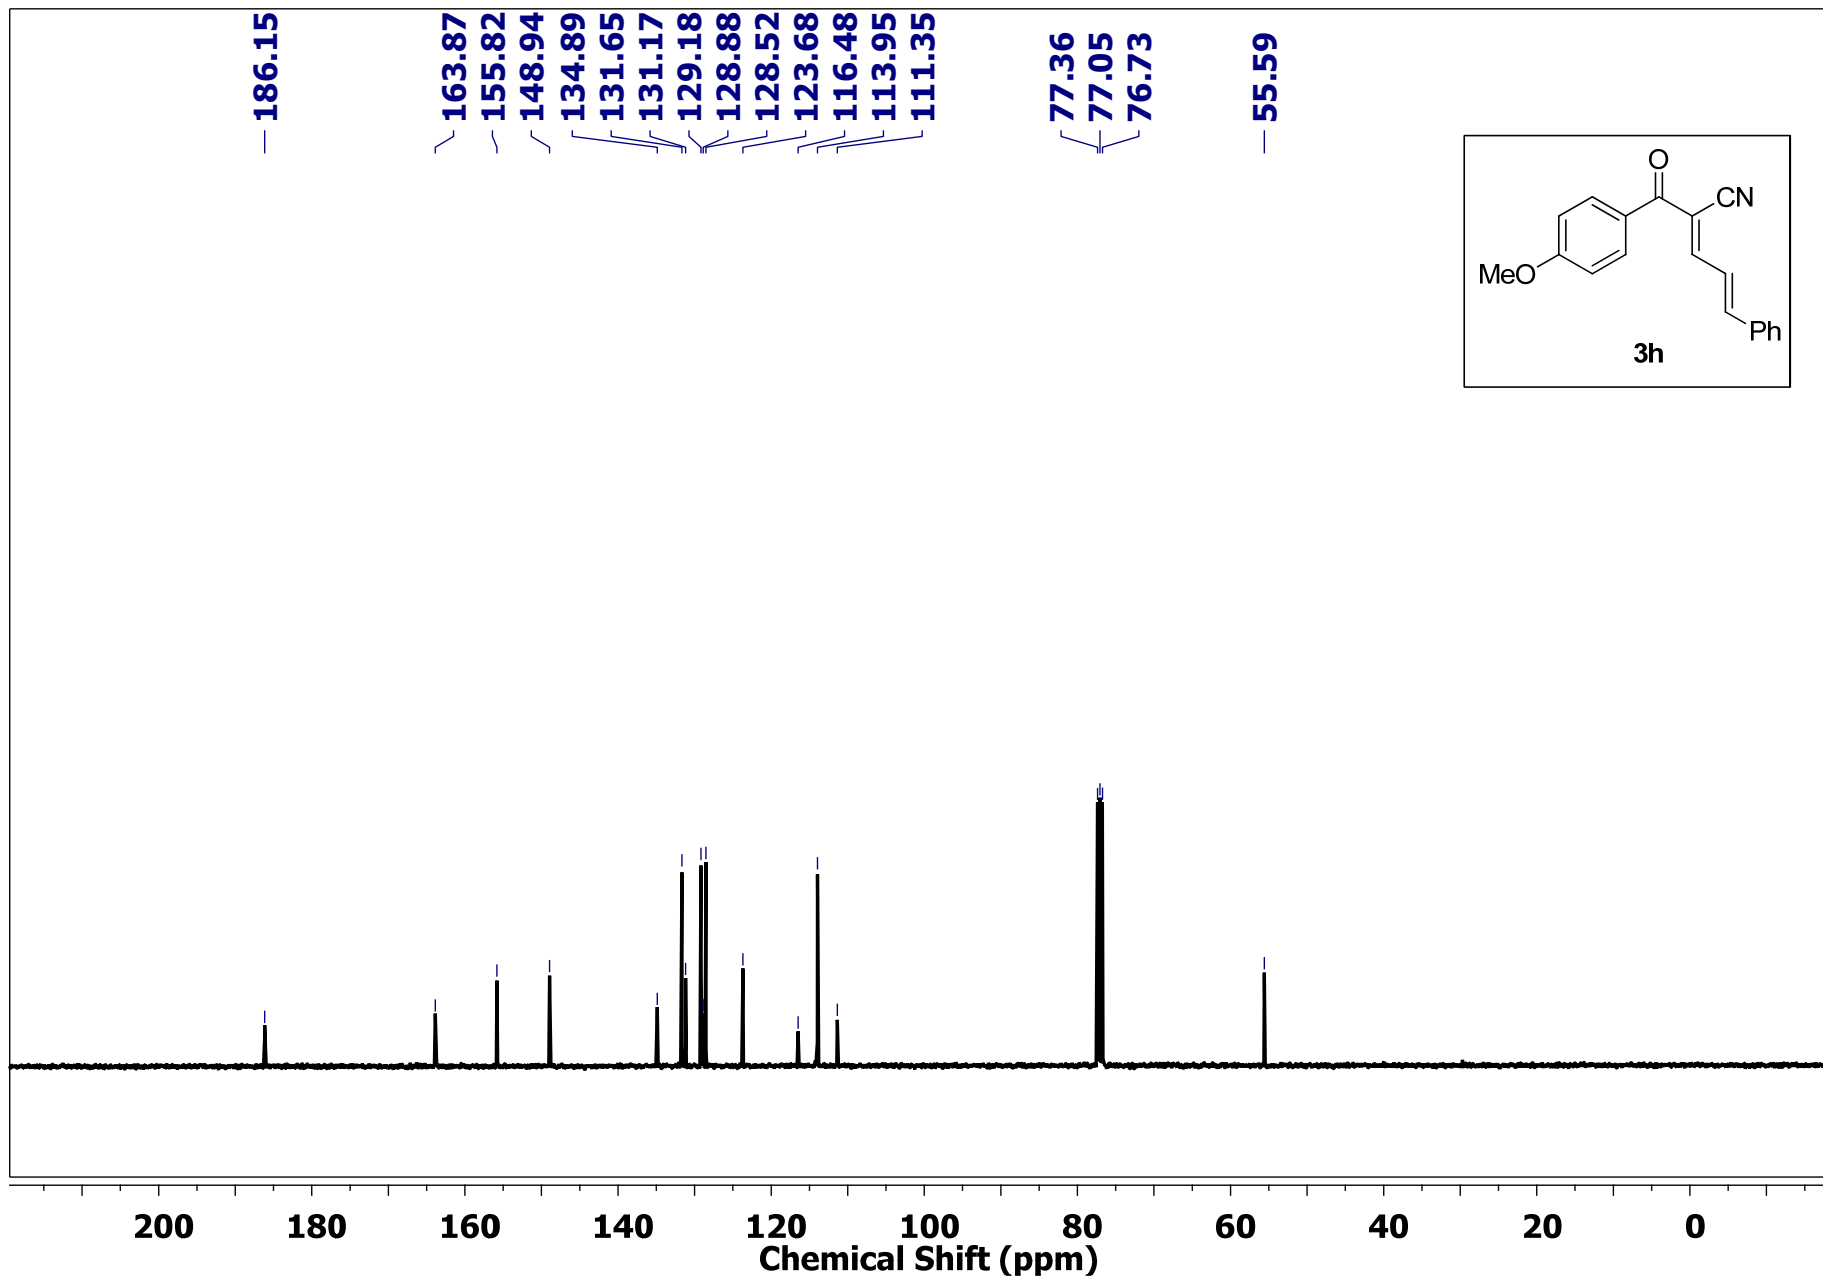

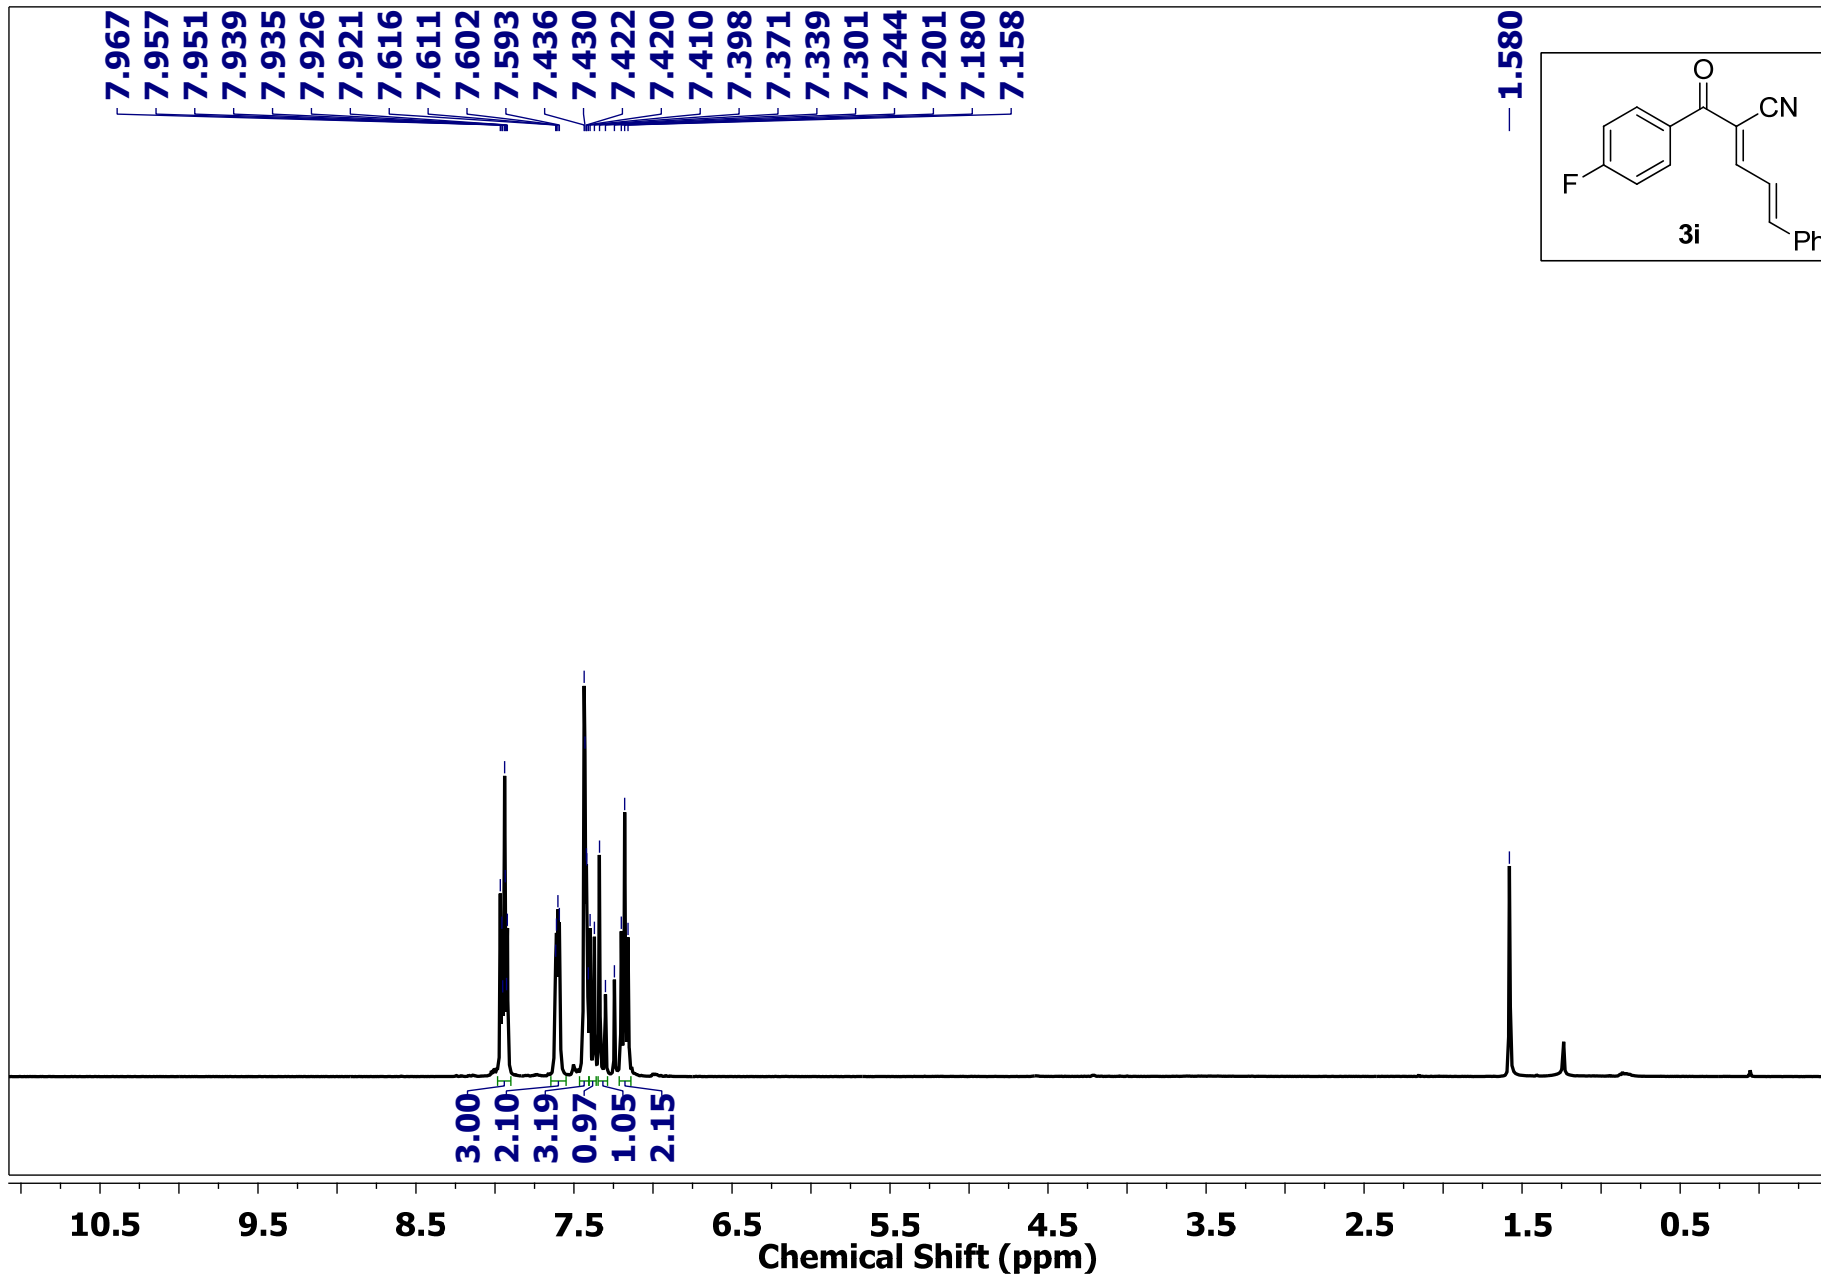

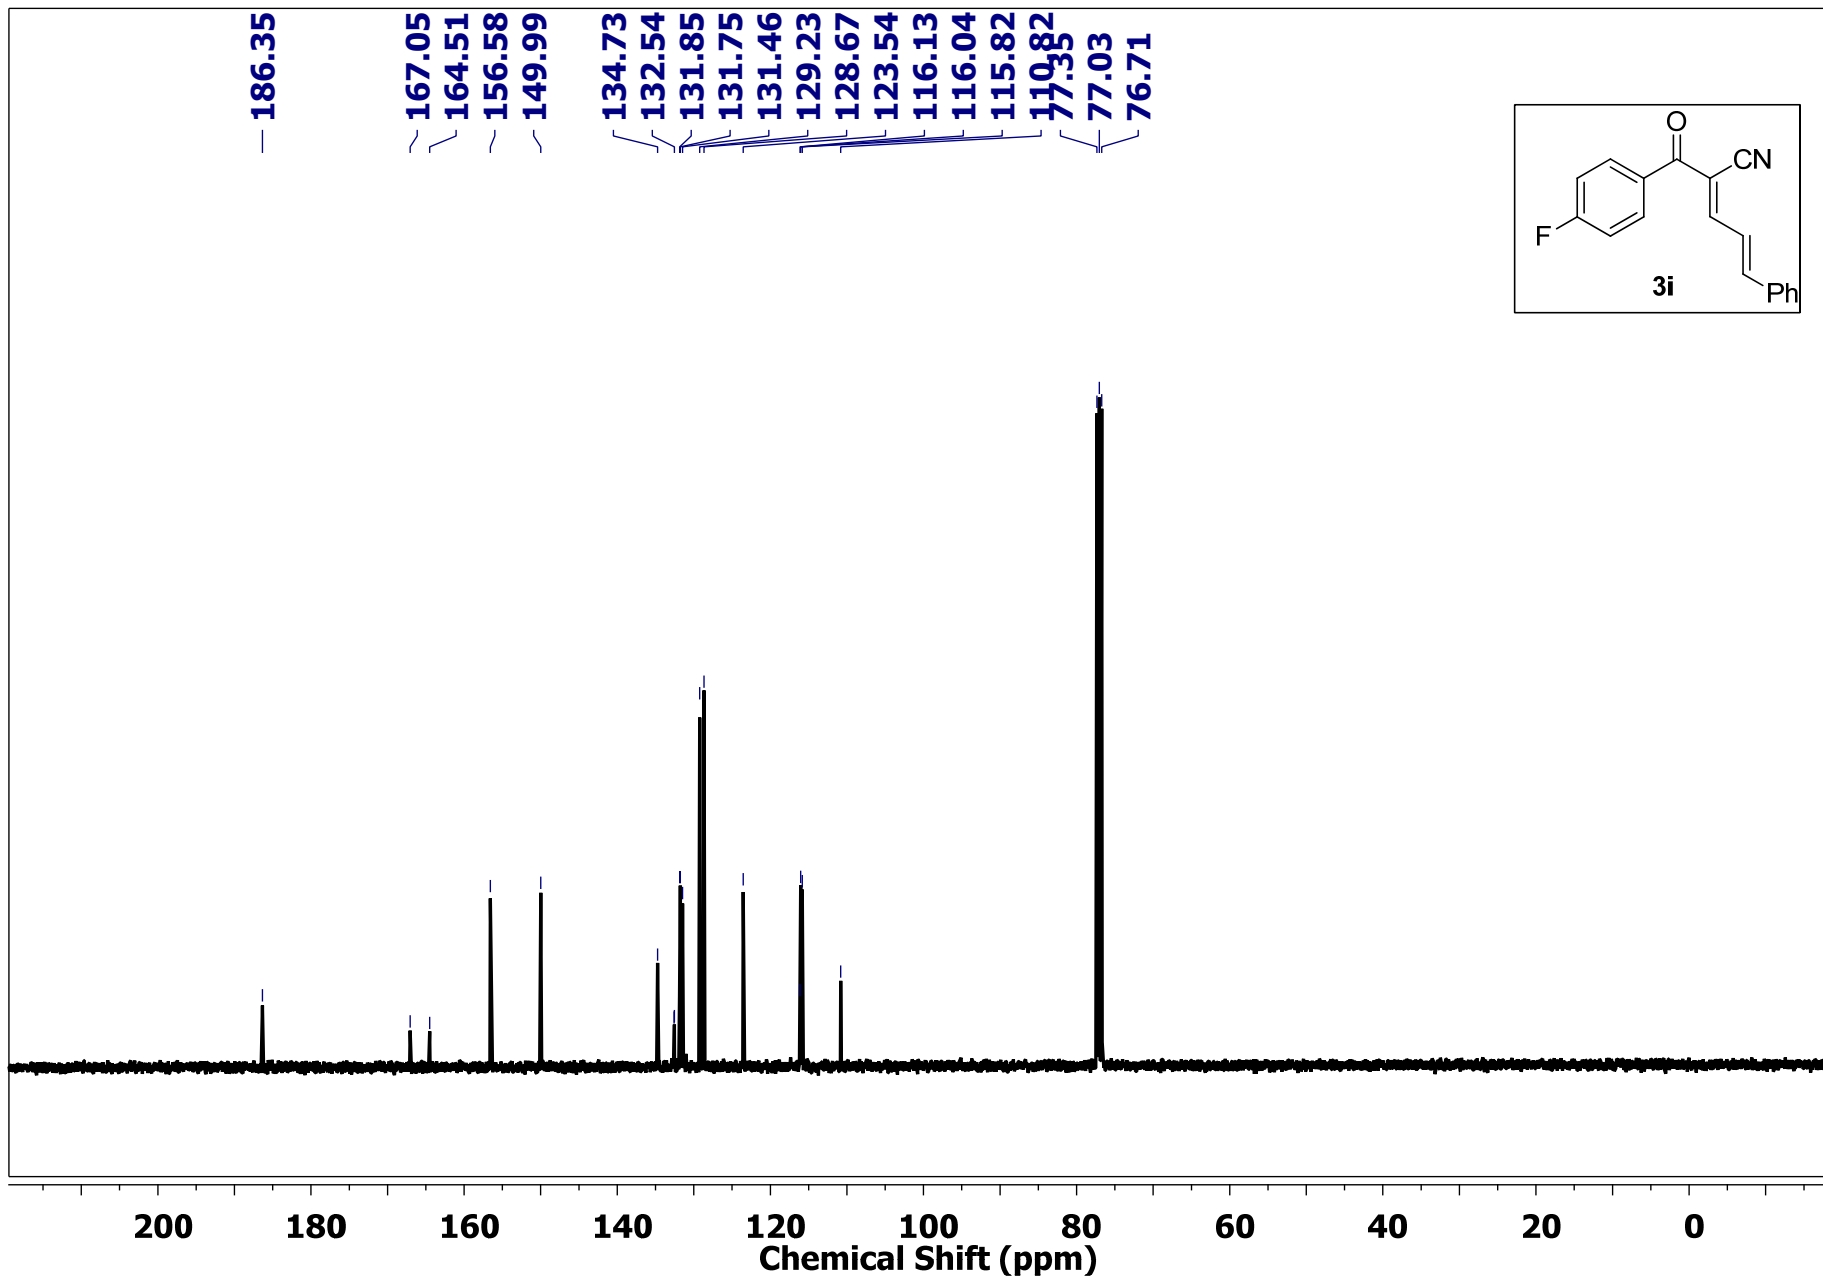

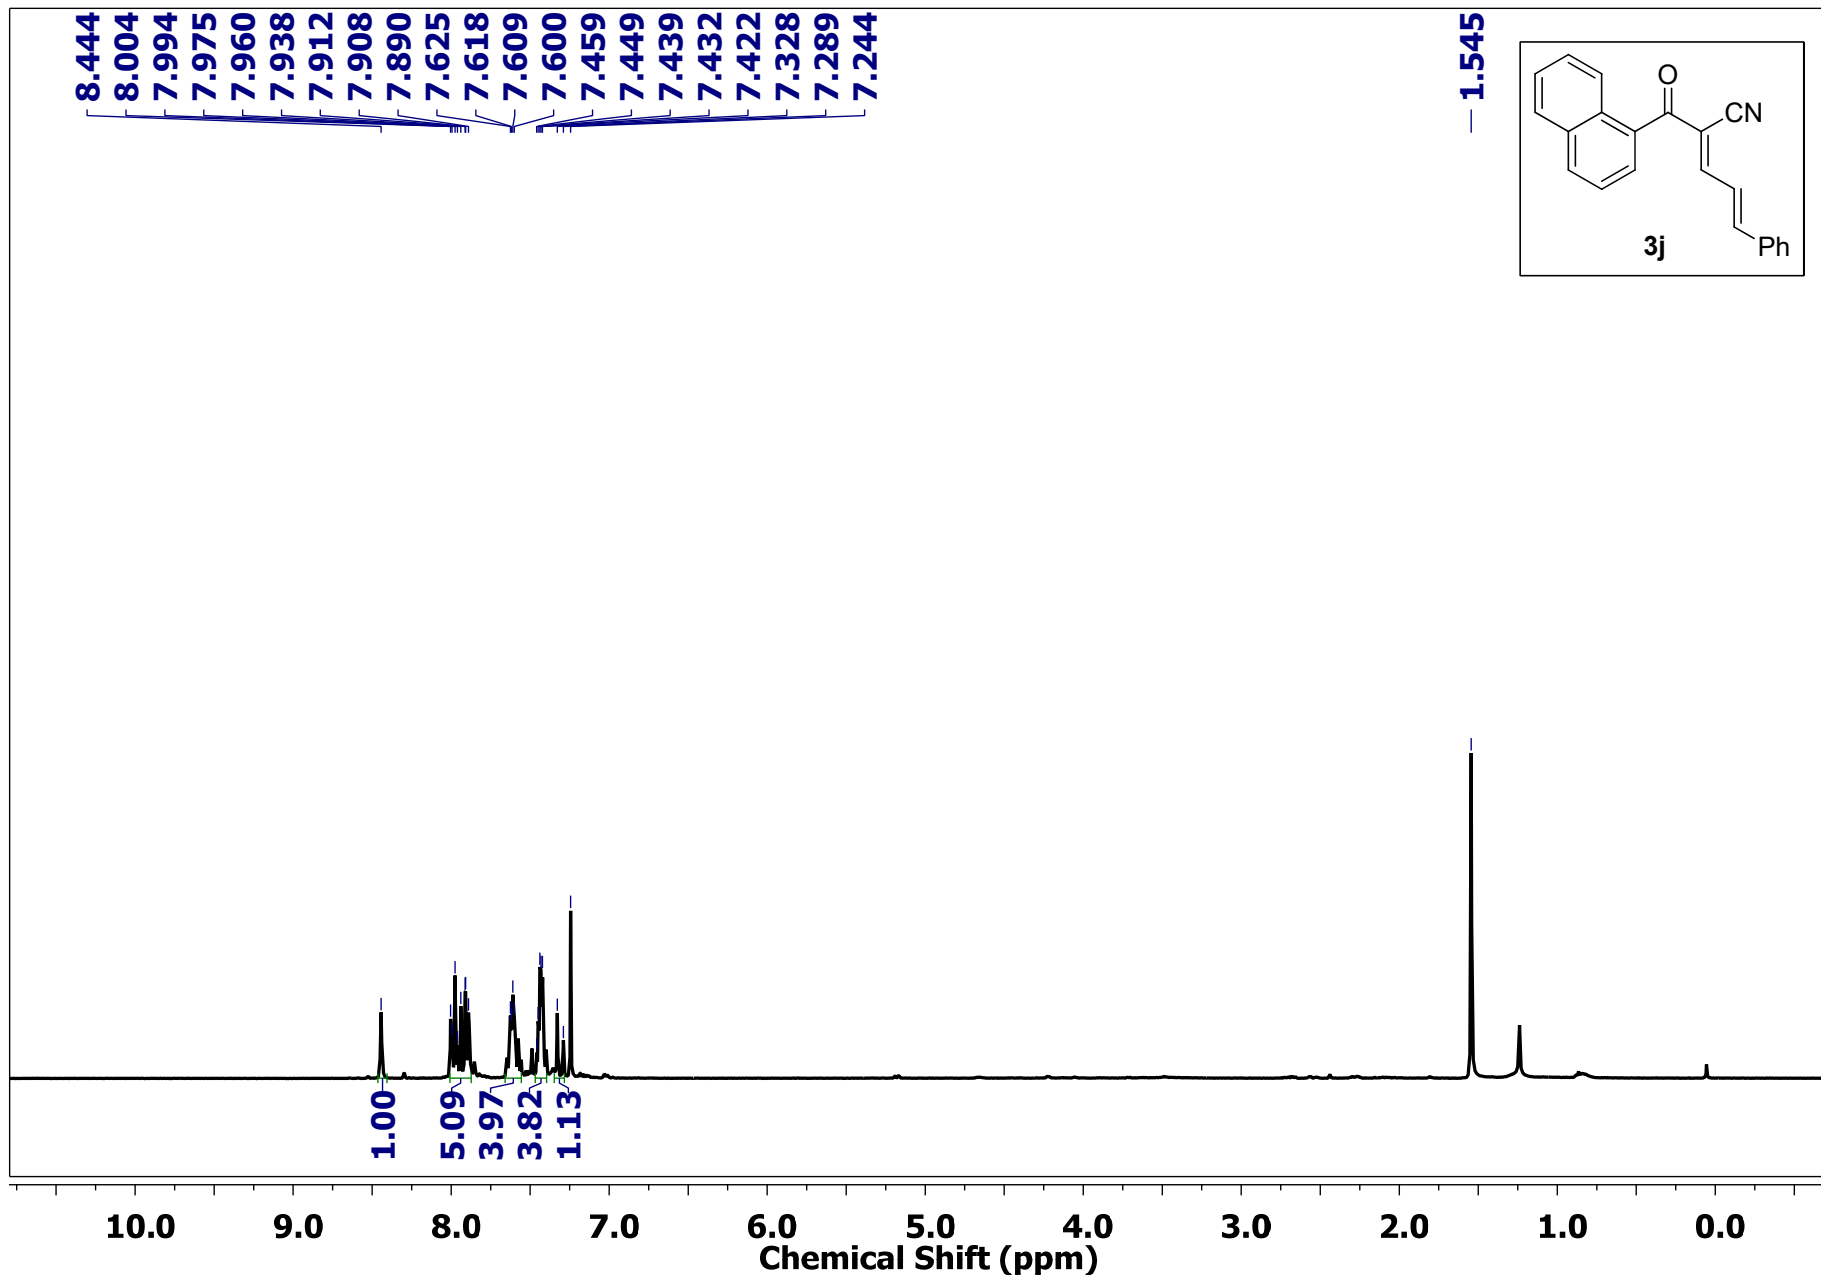

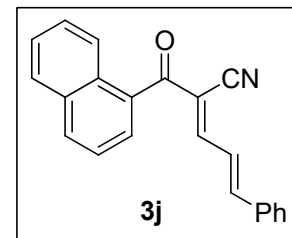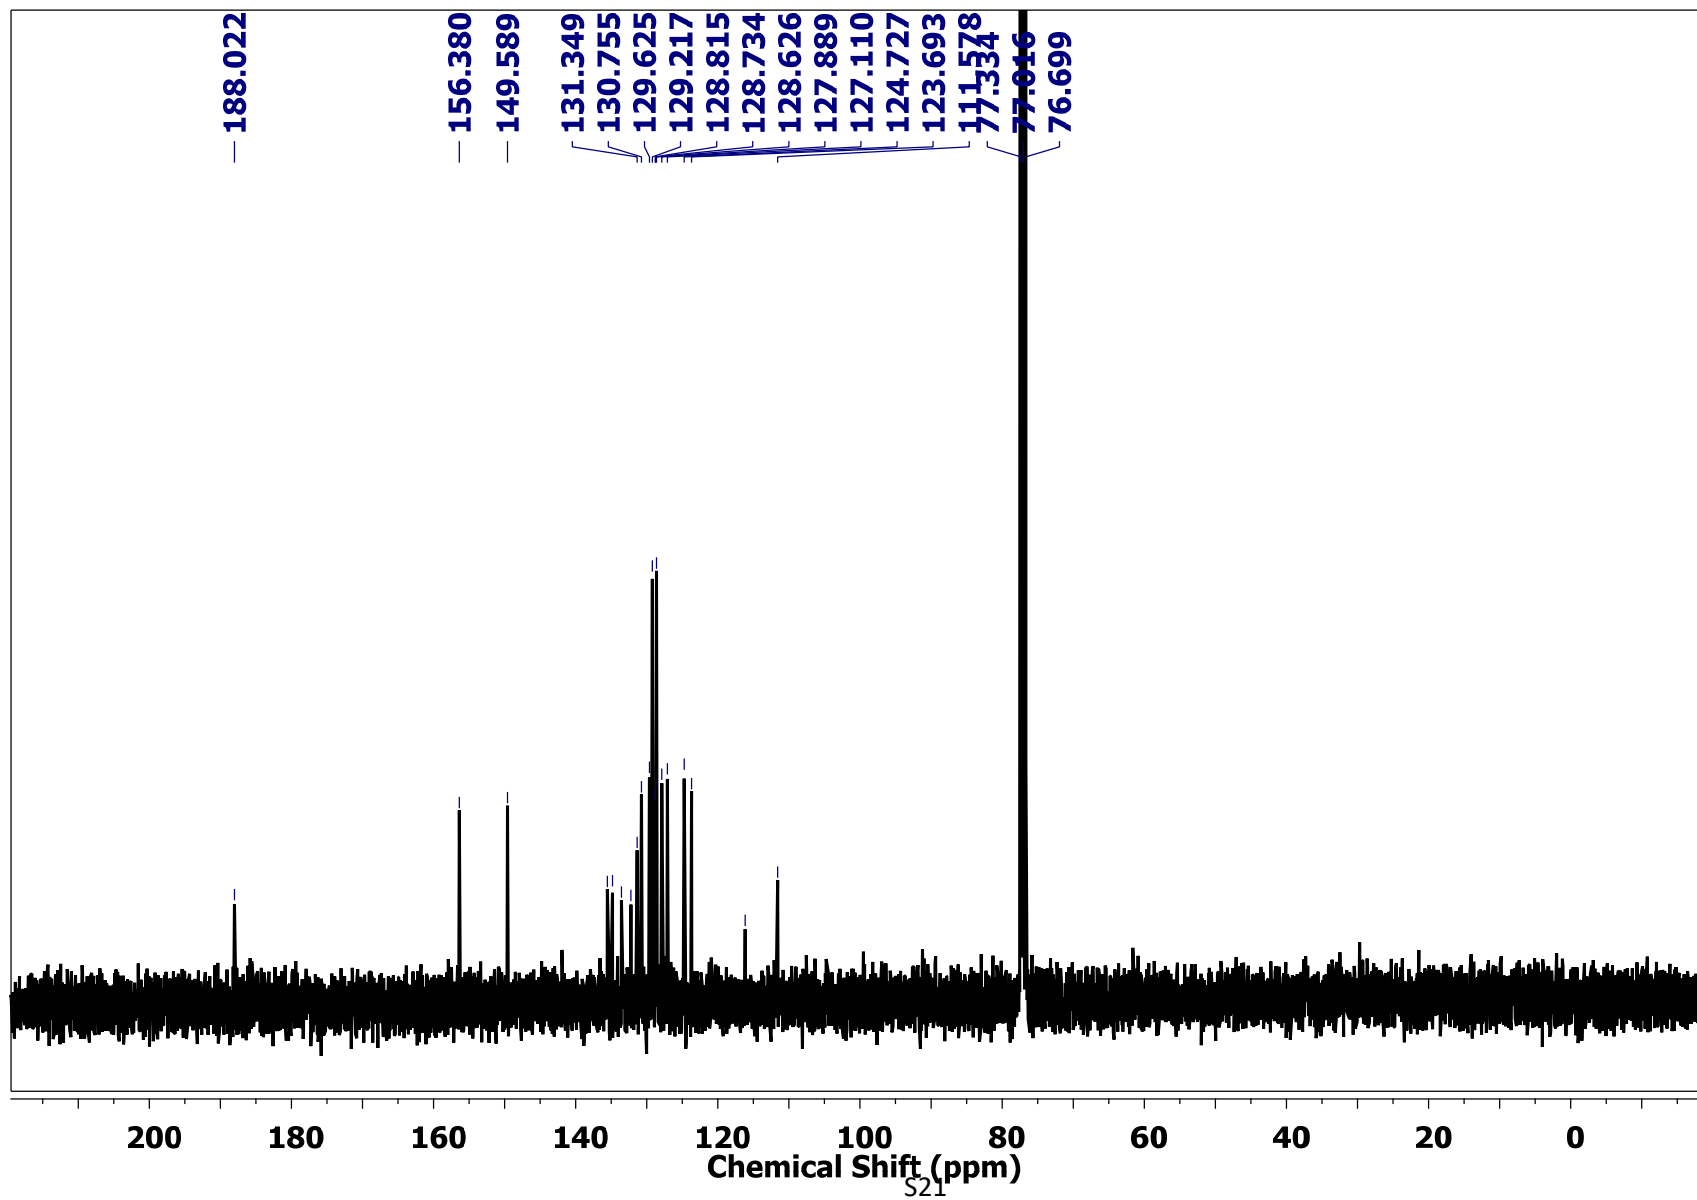

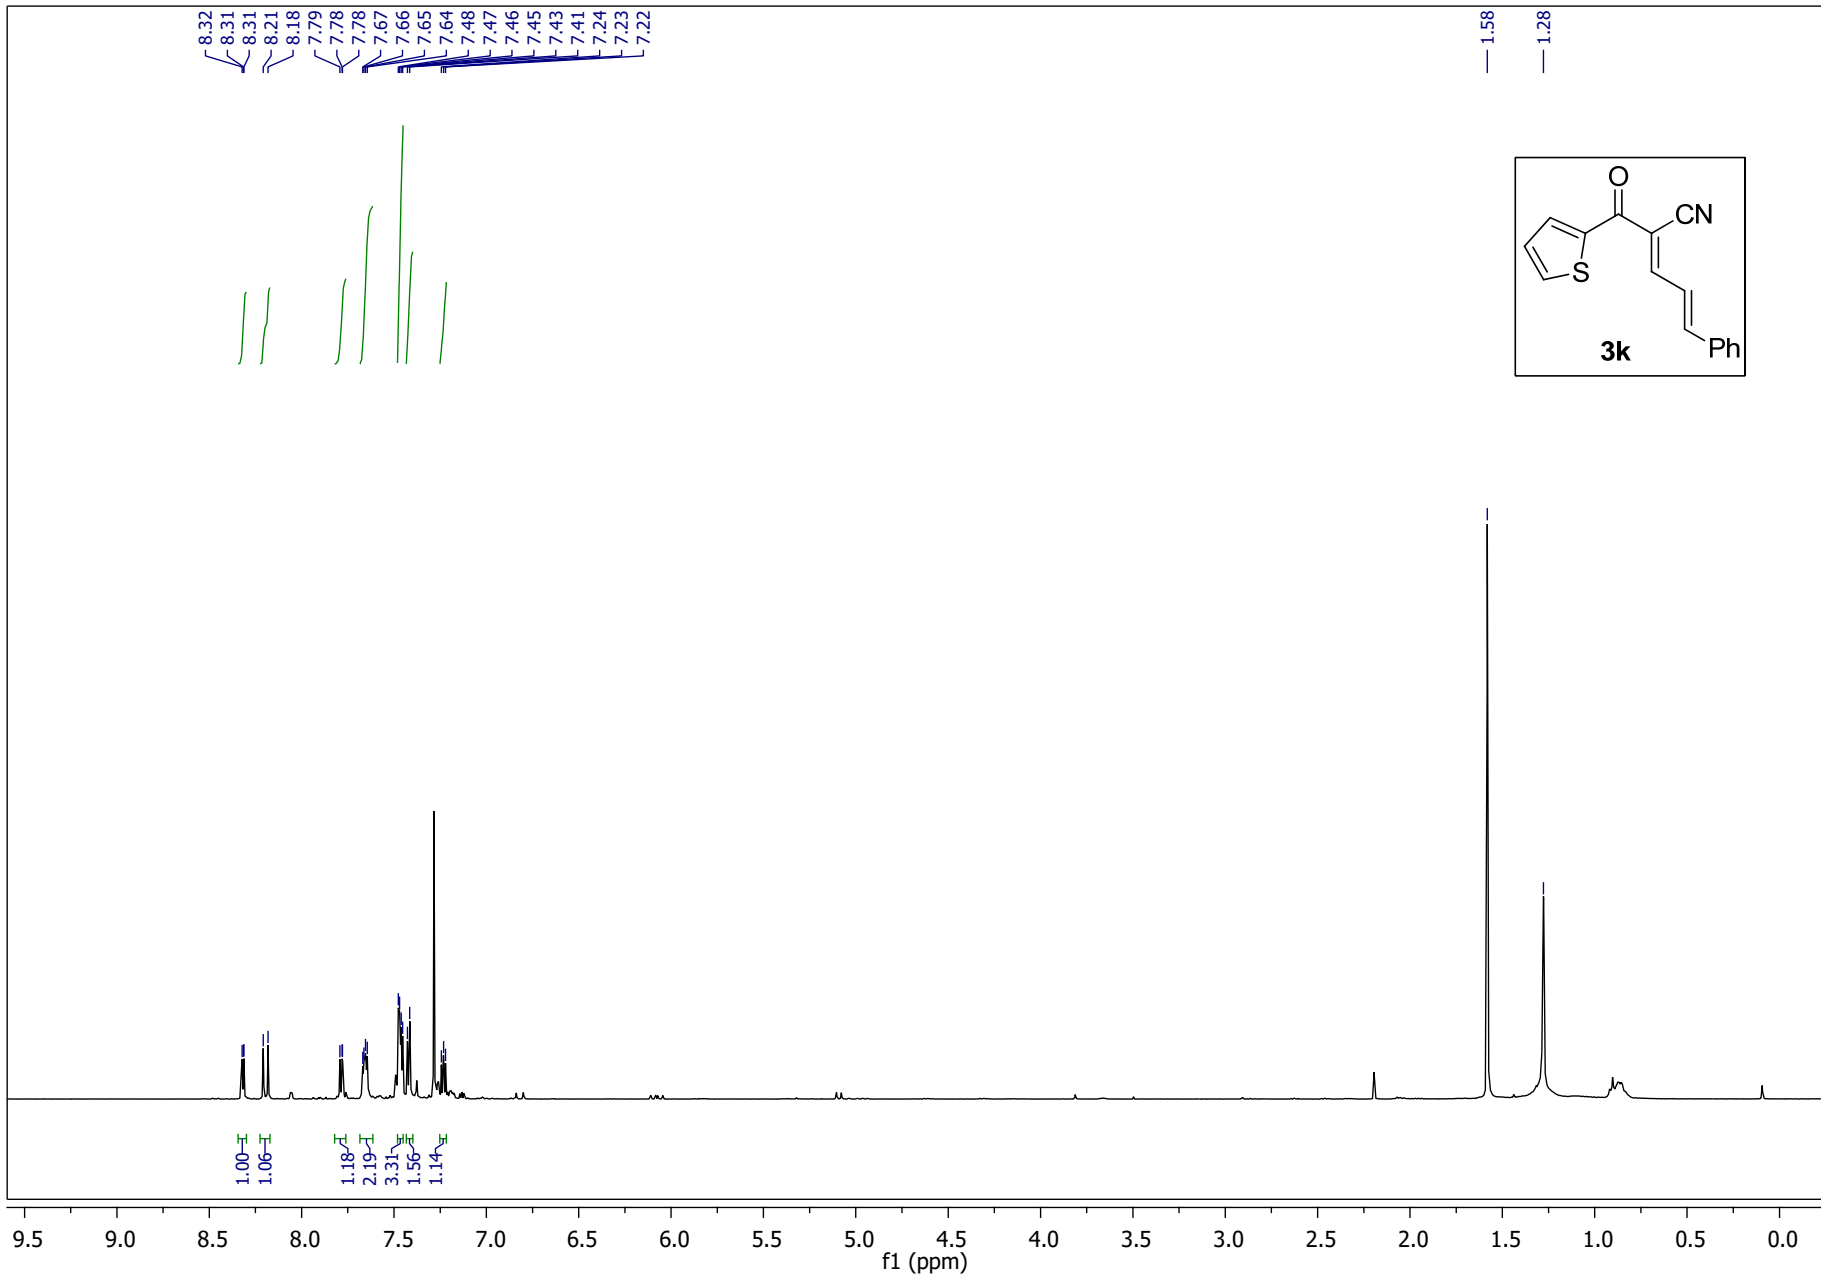

S22

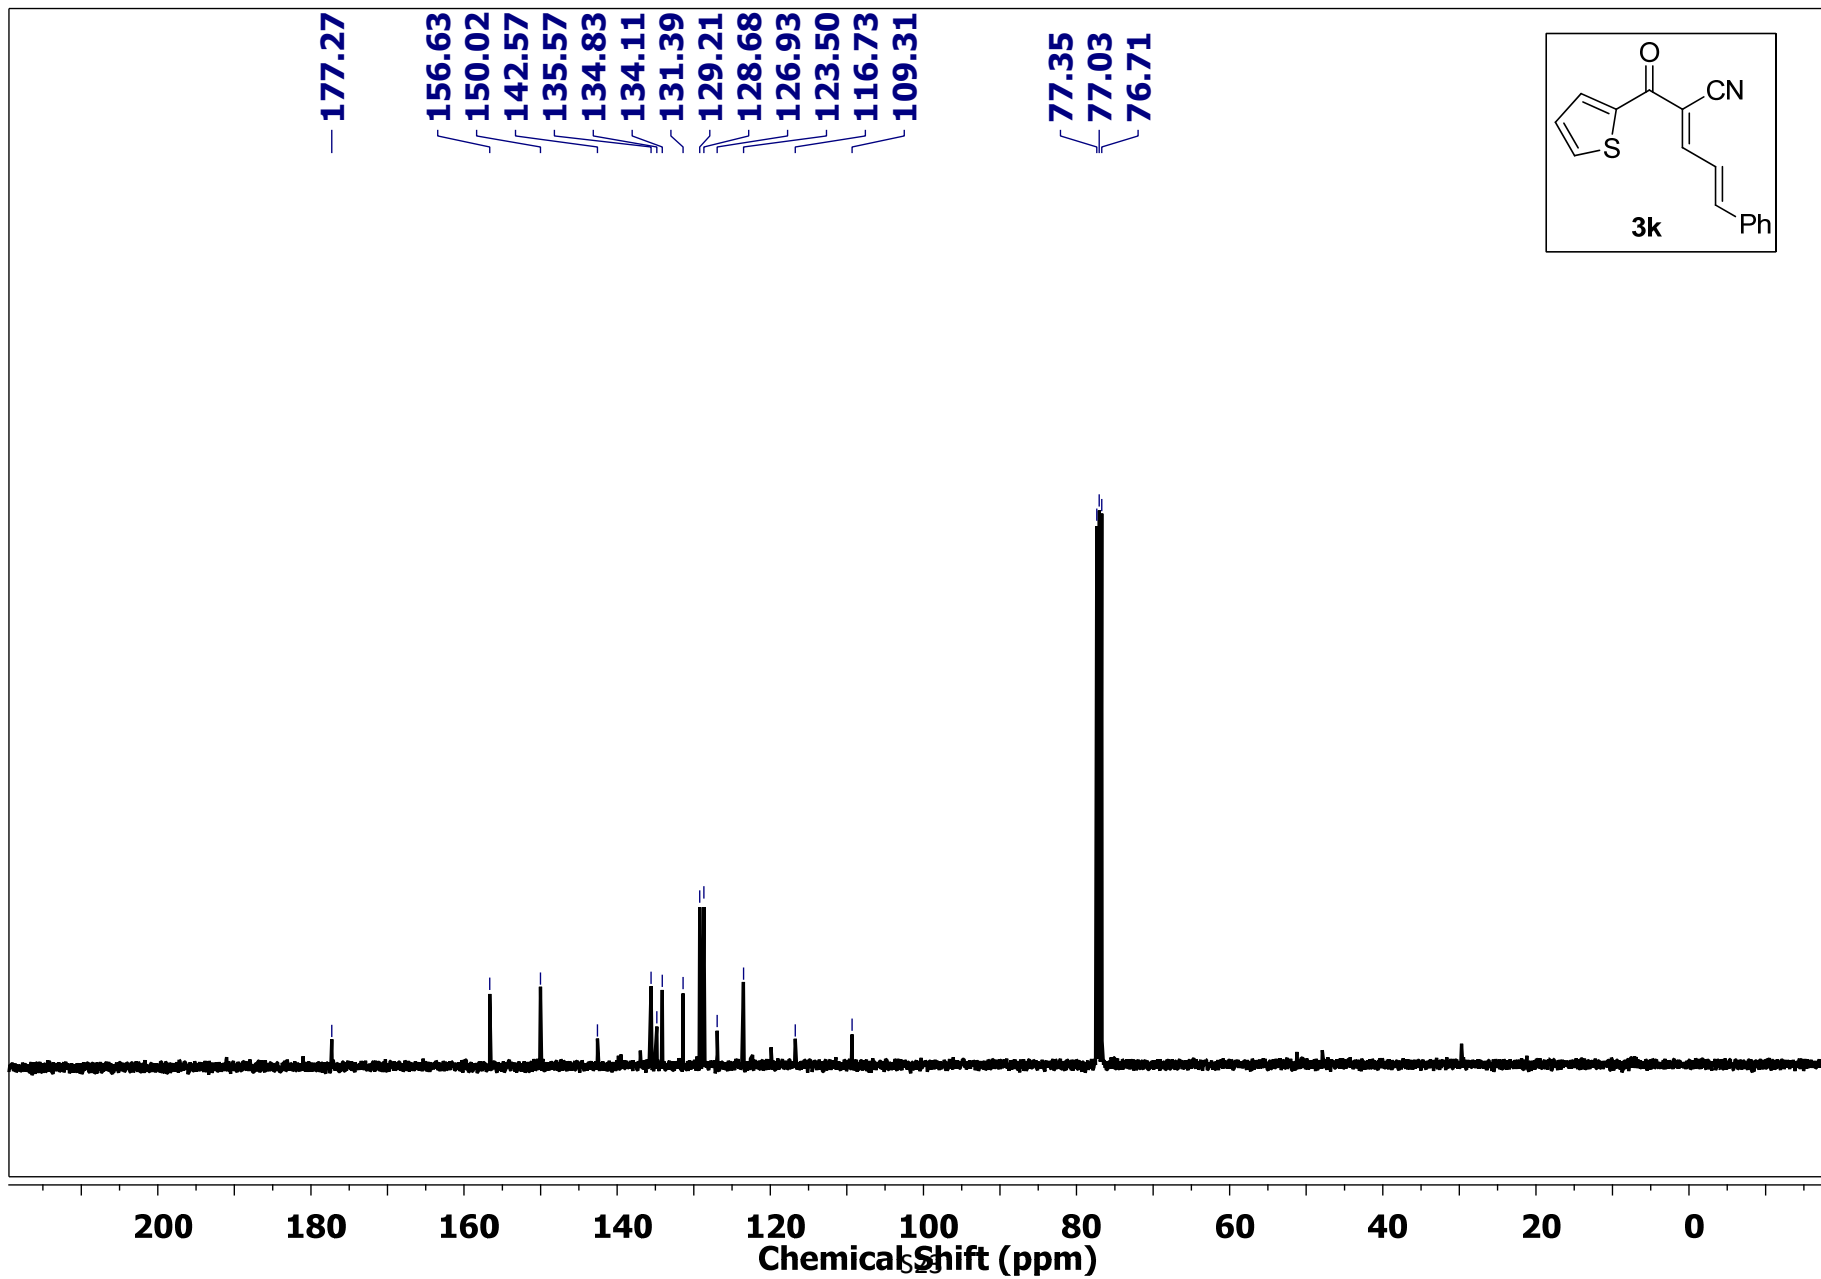

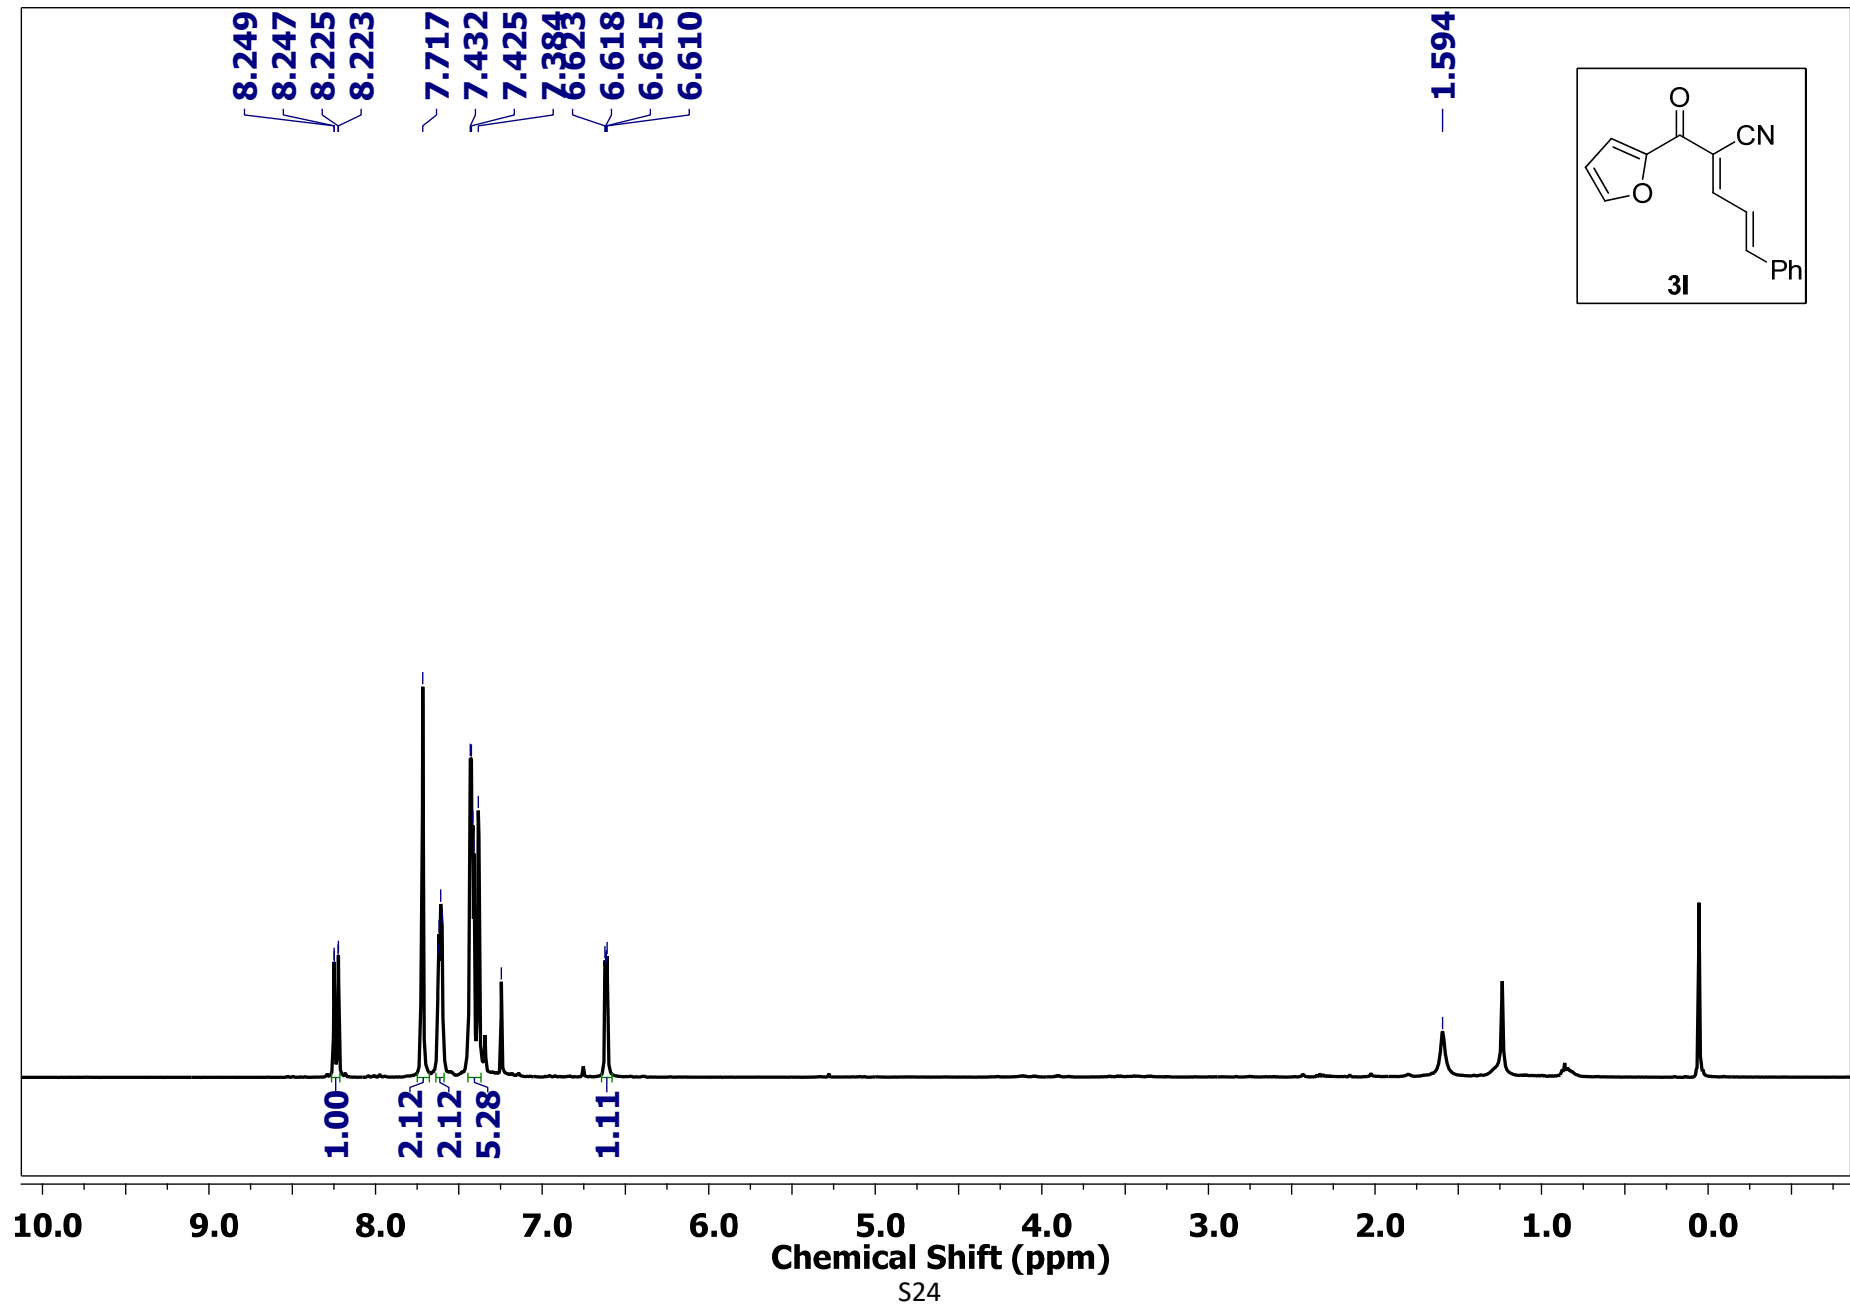



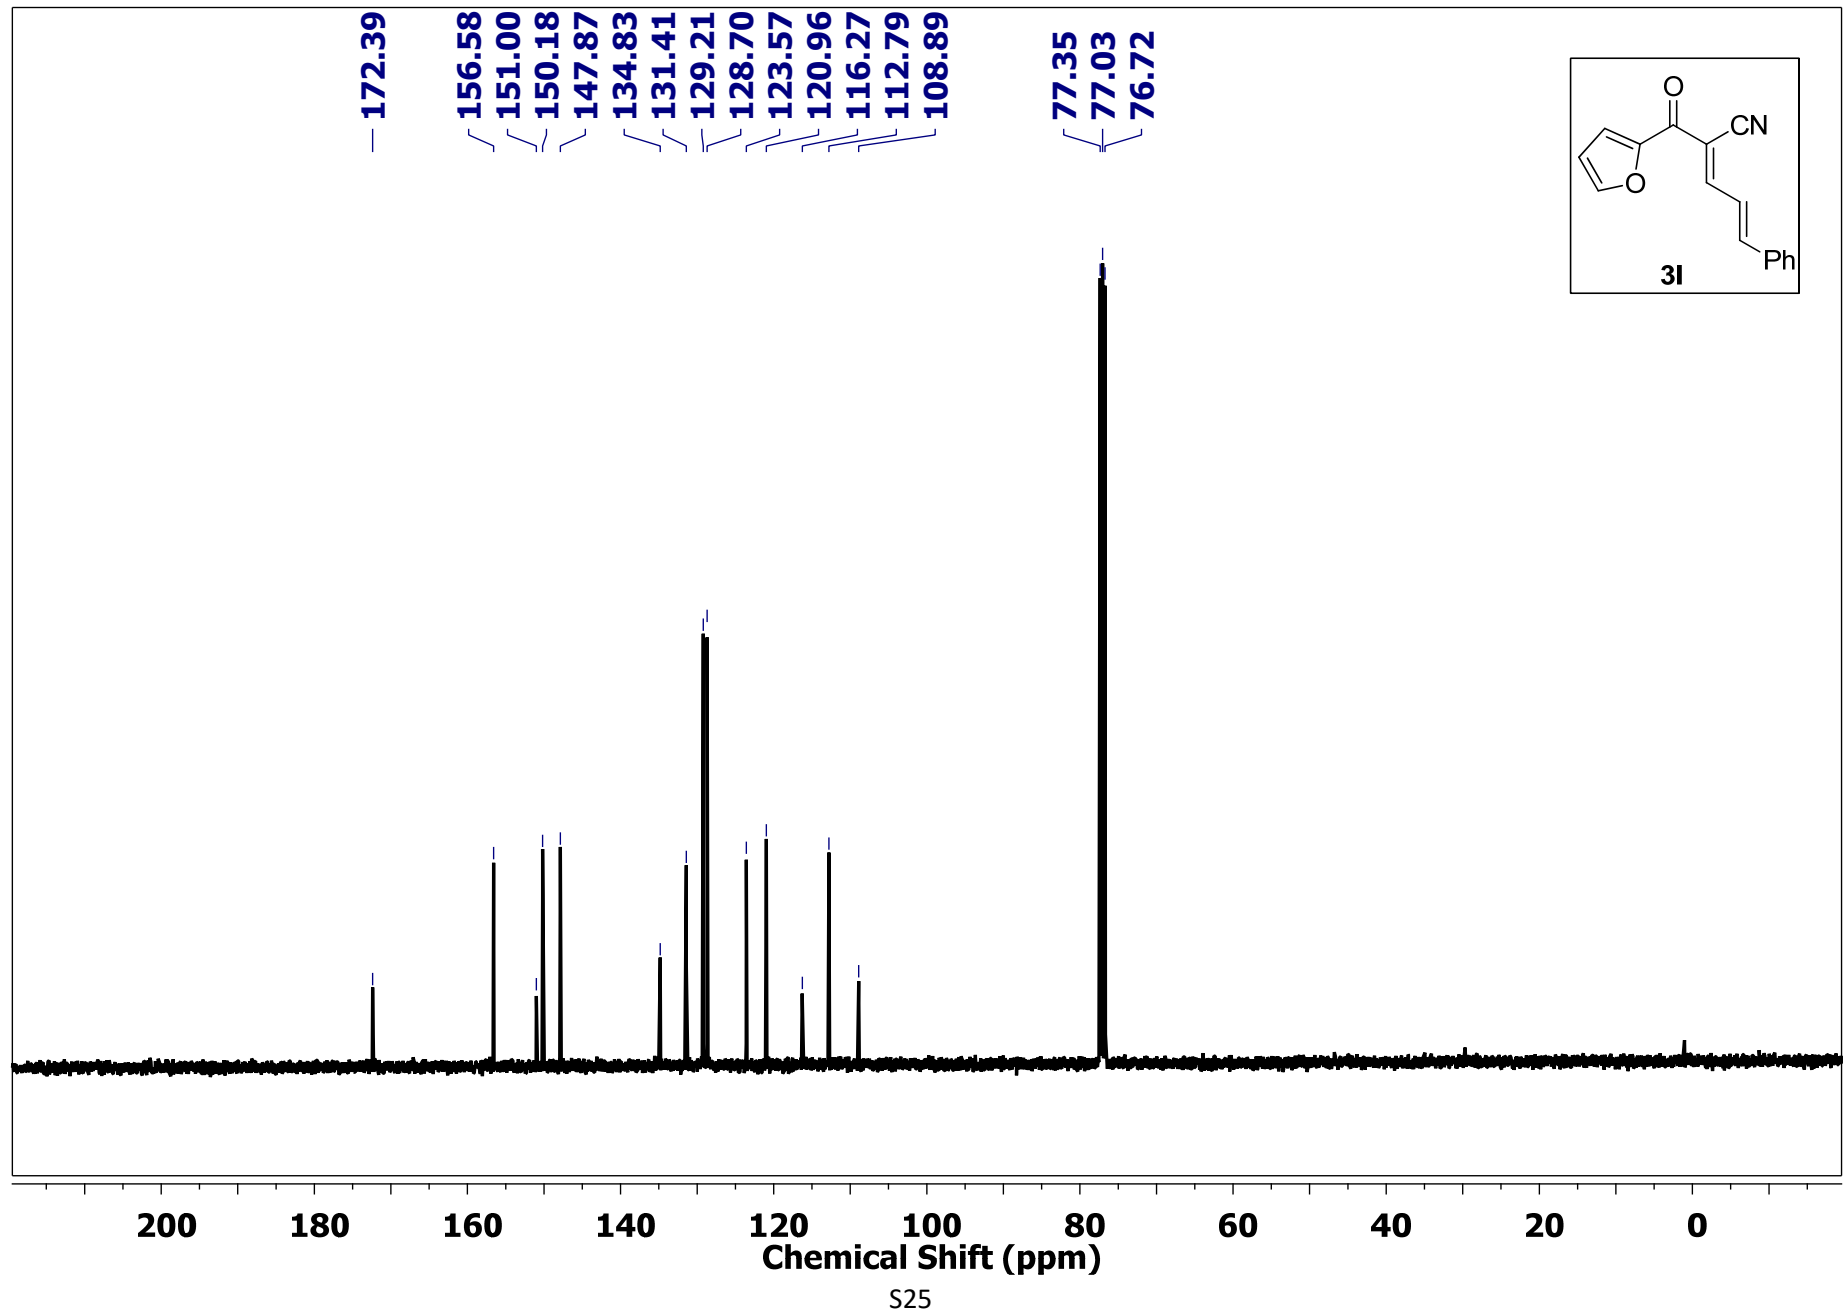

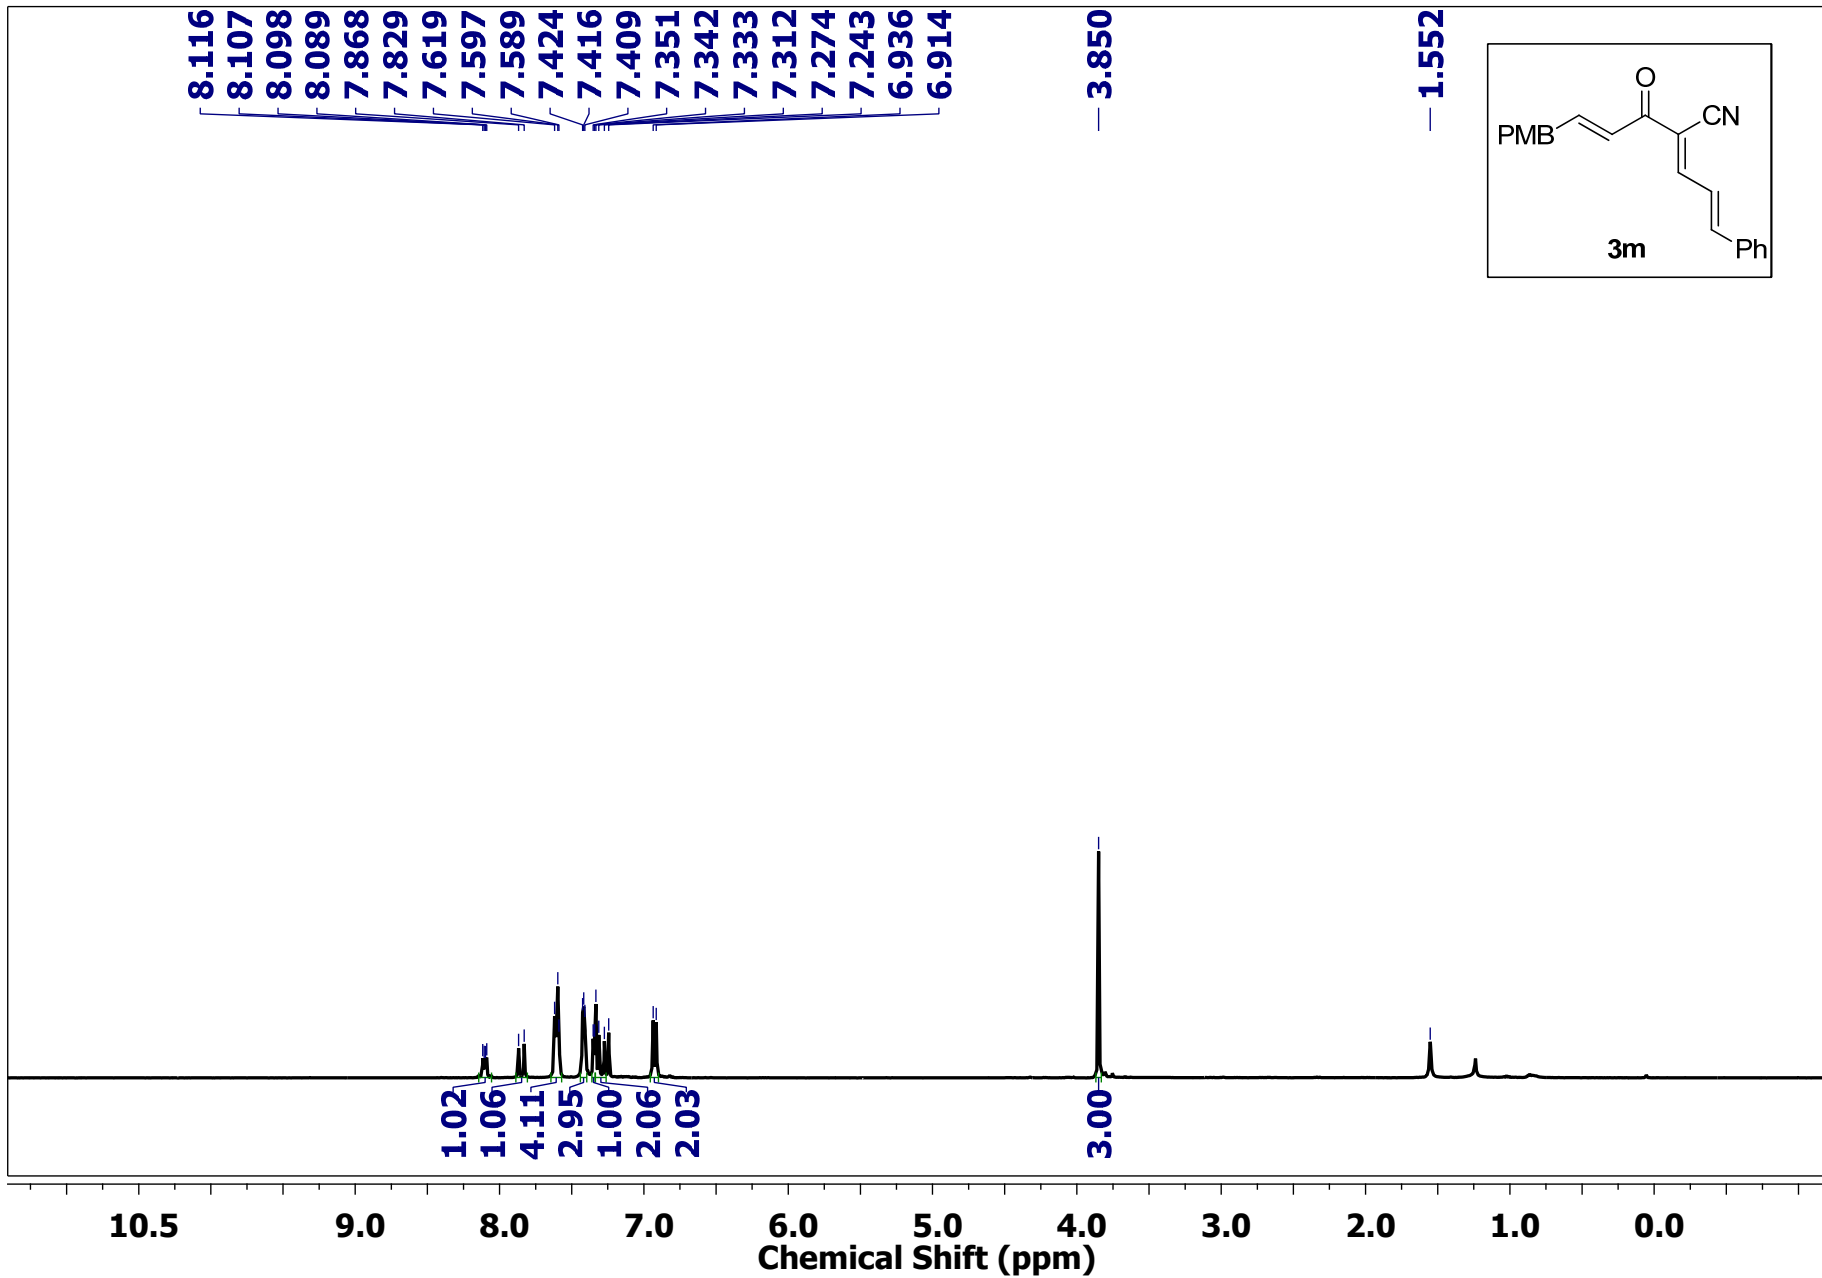

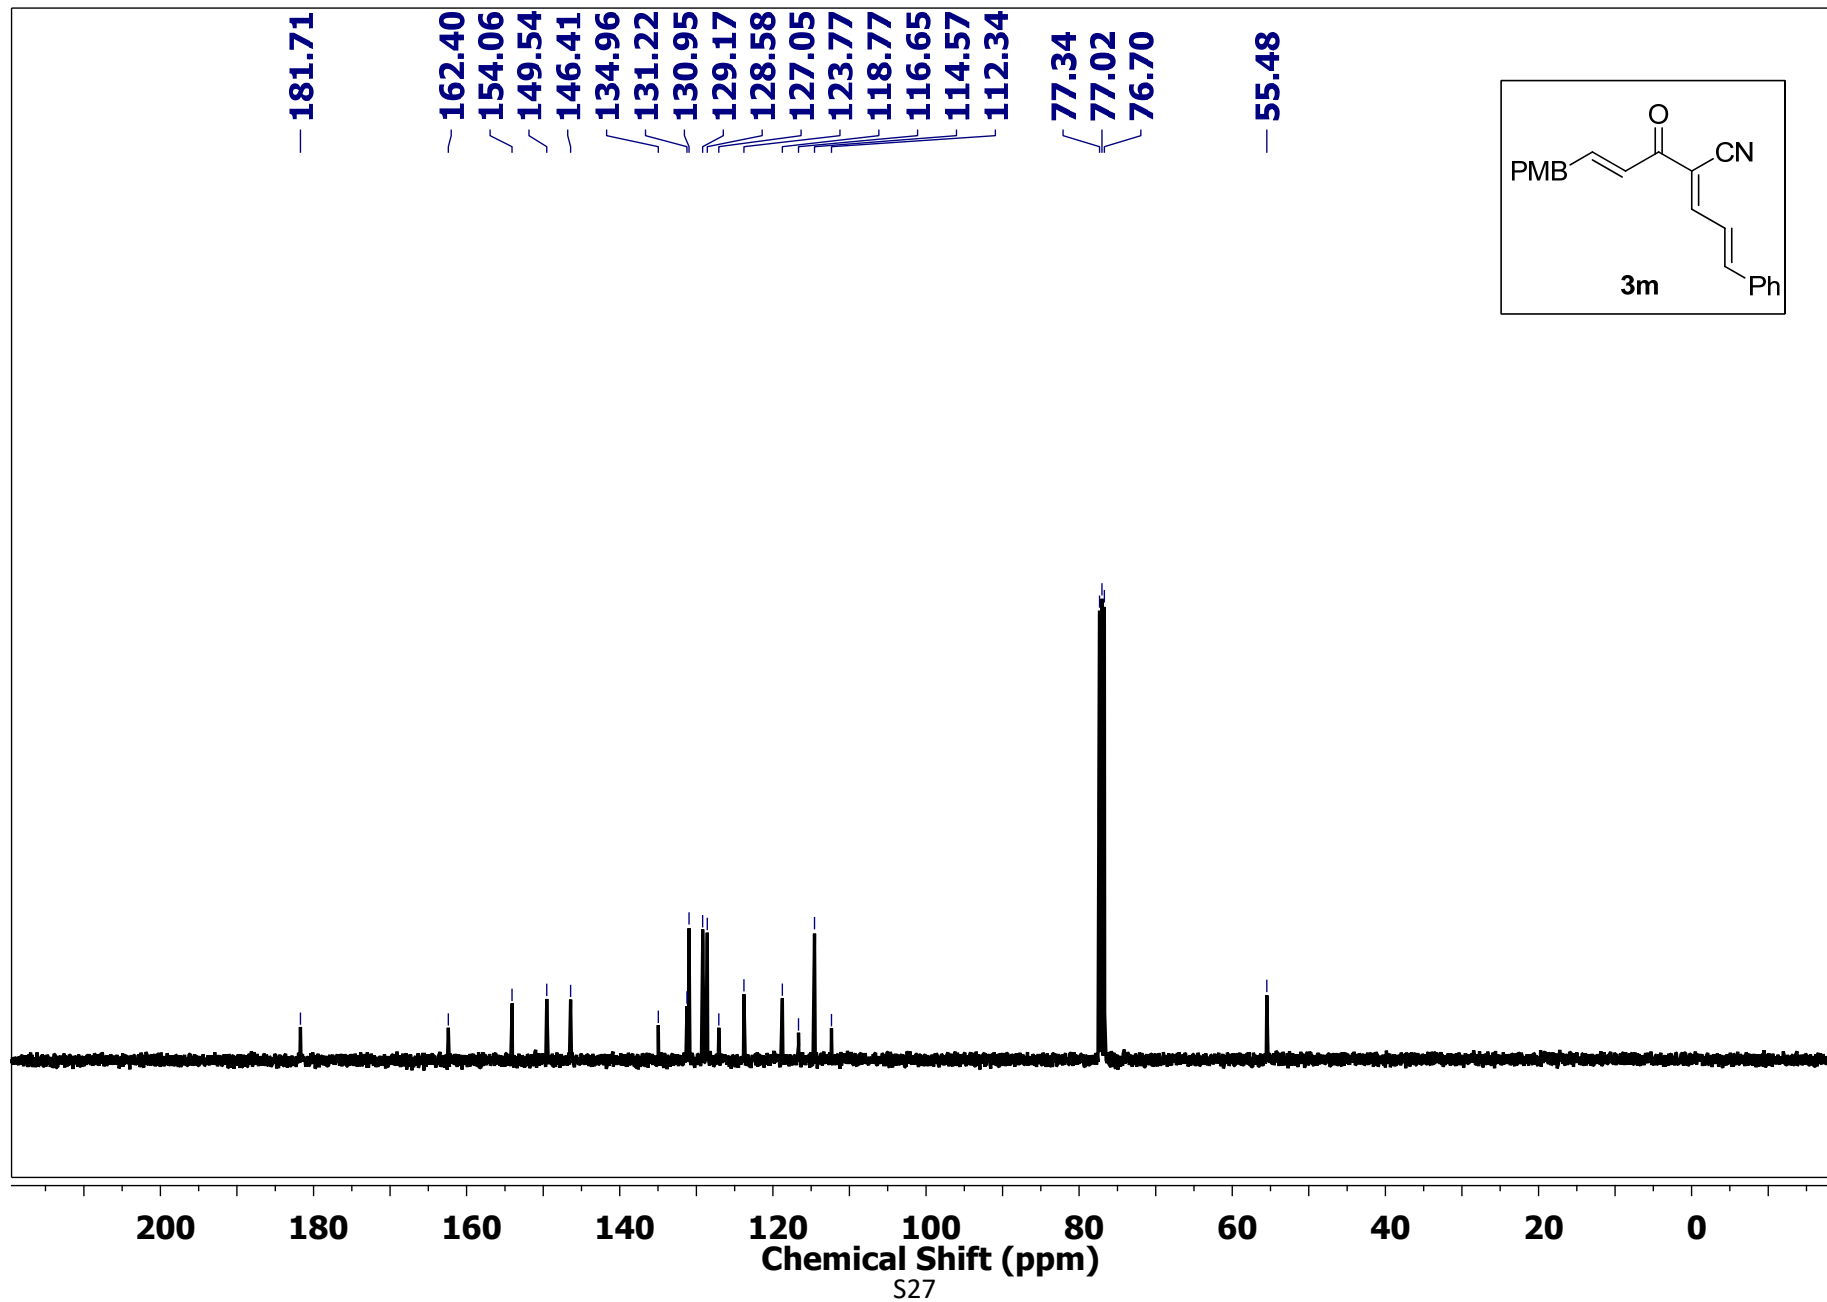

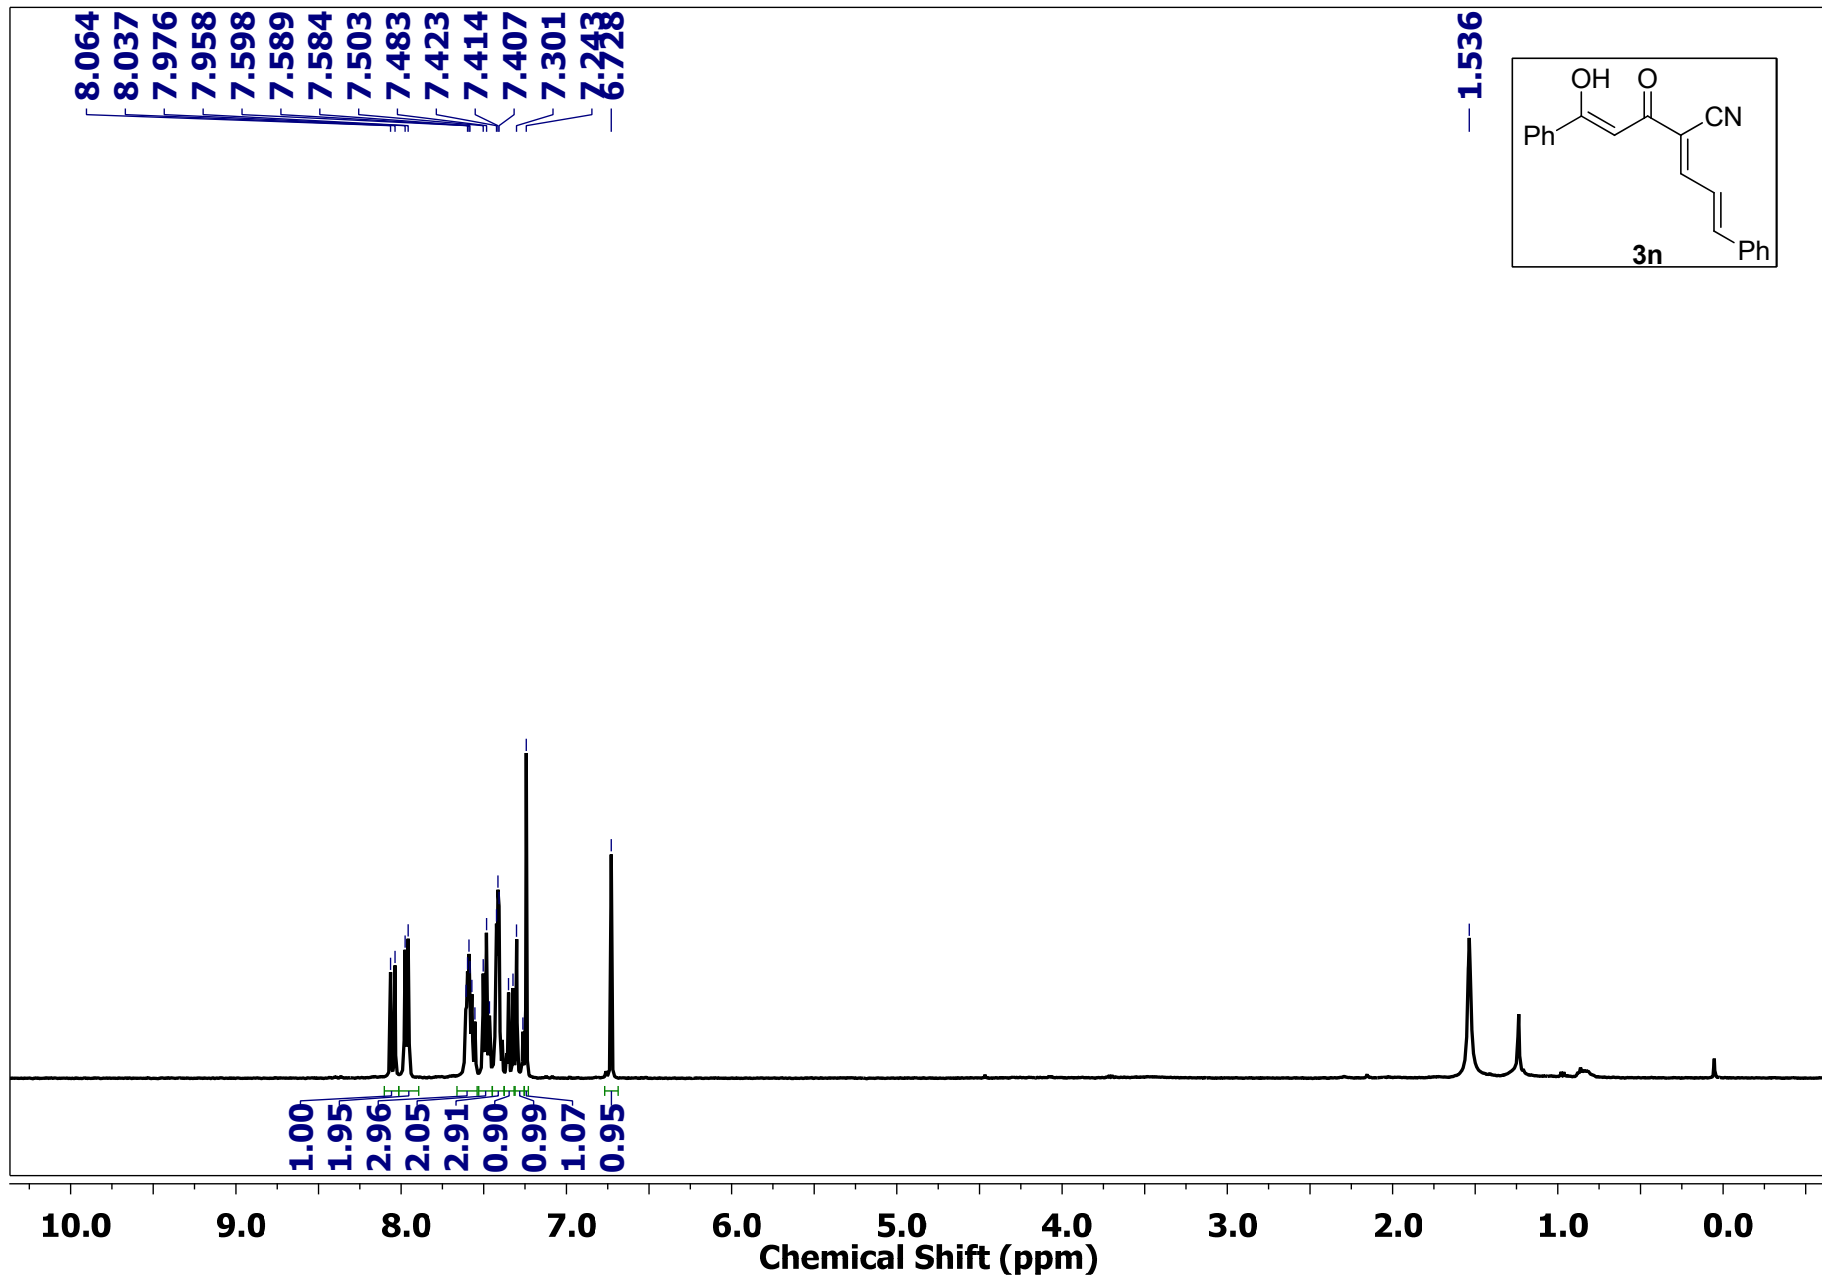

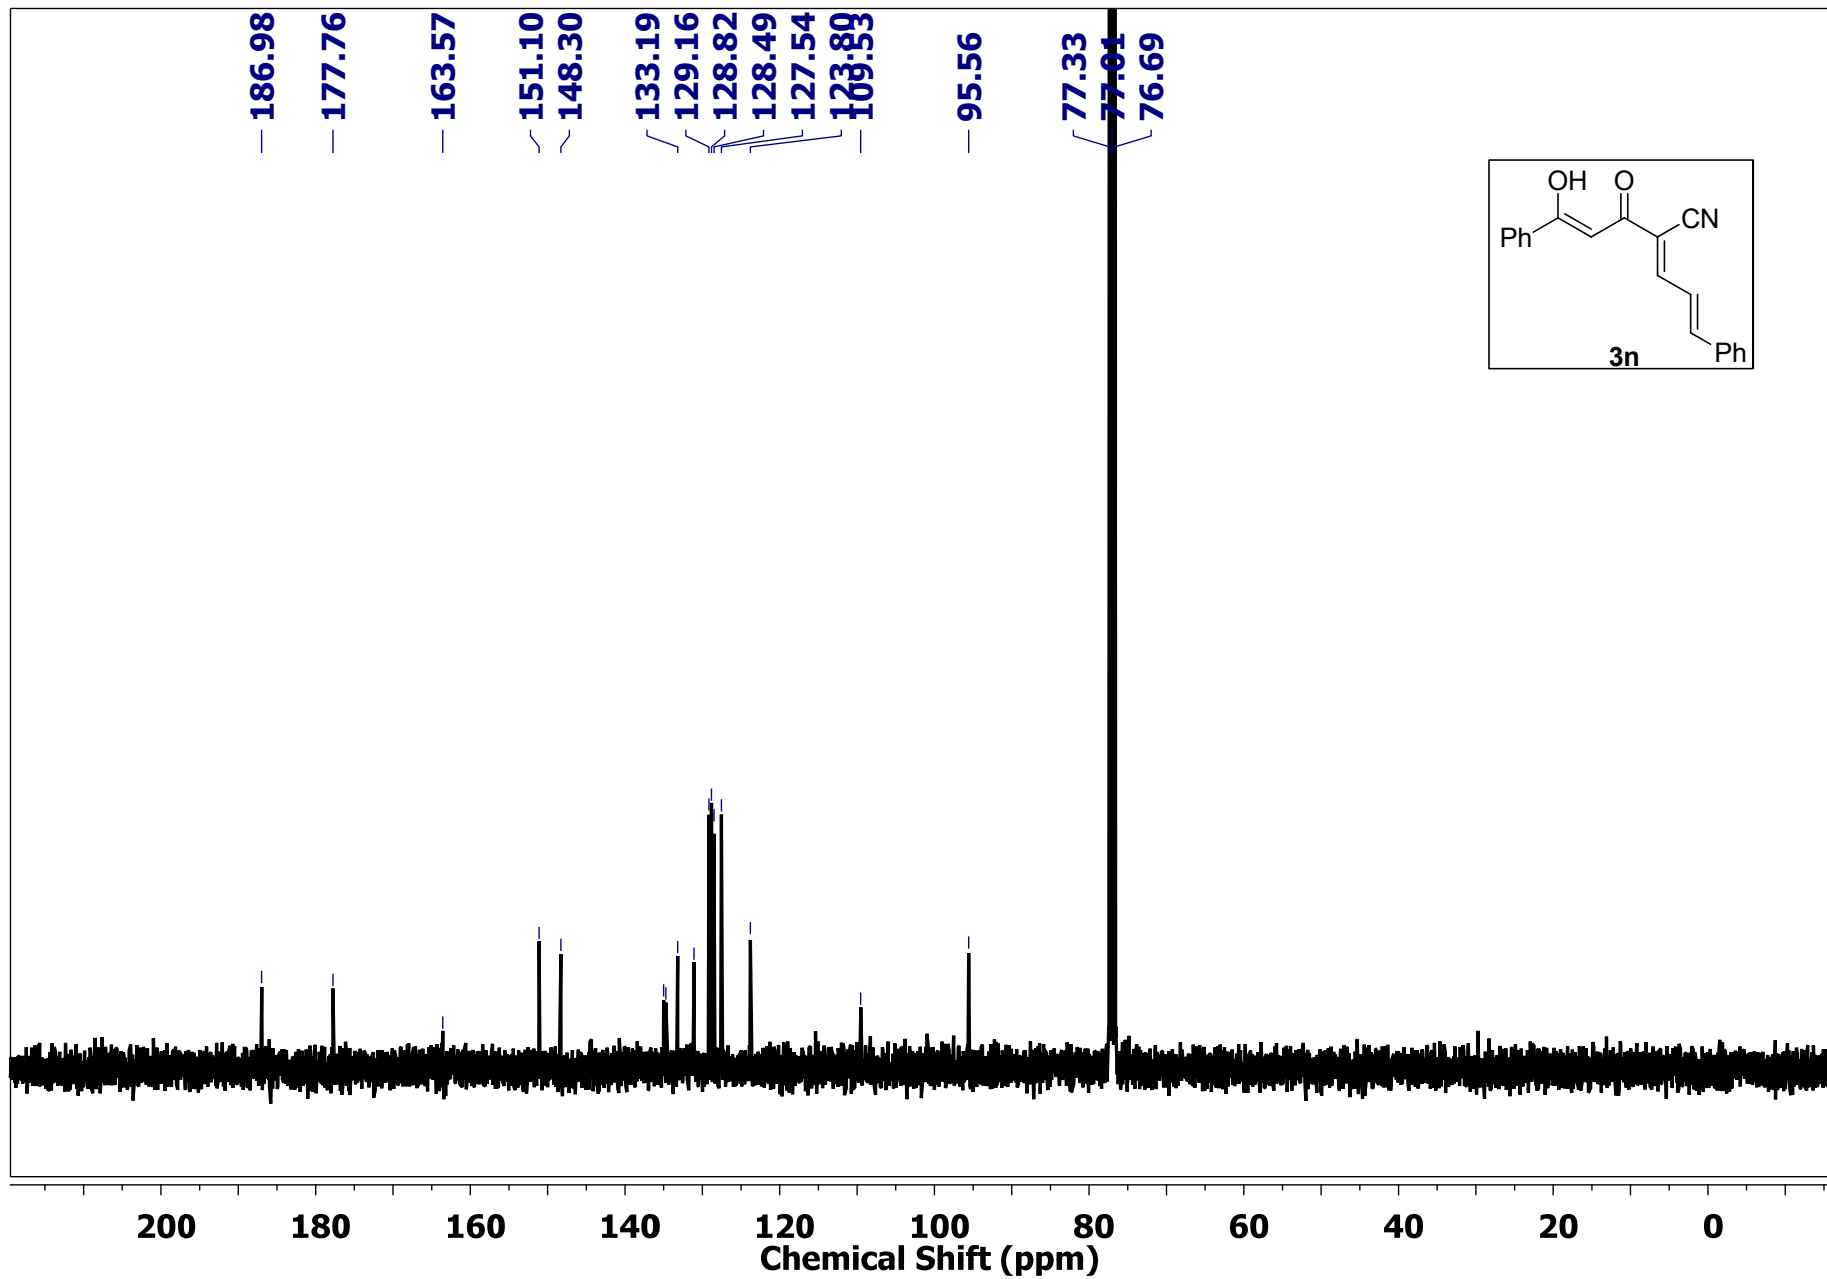

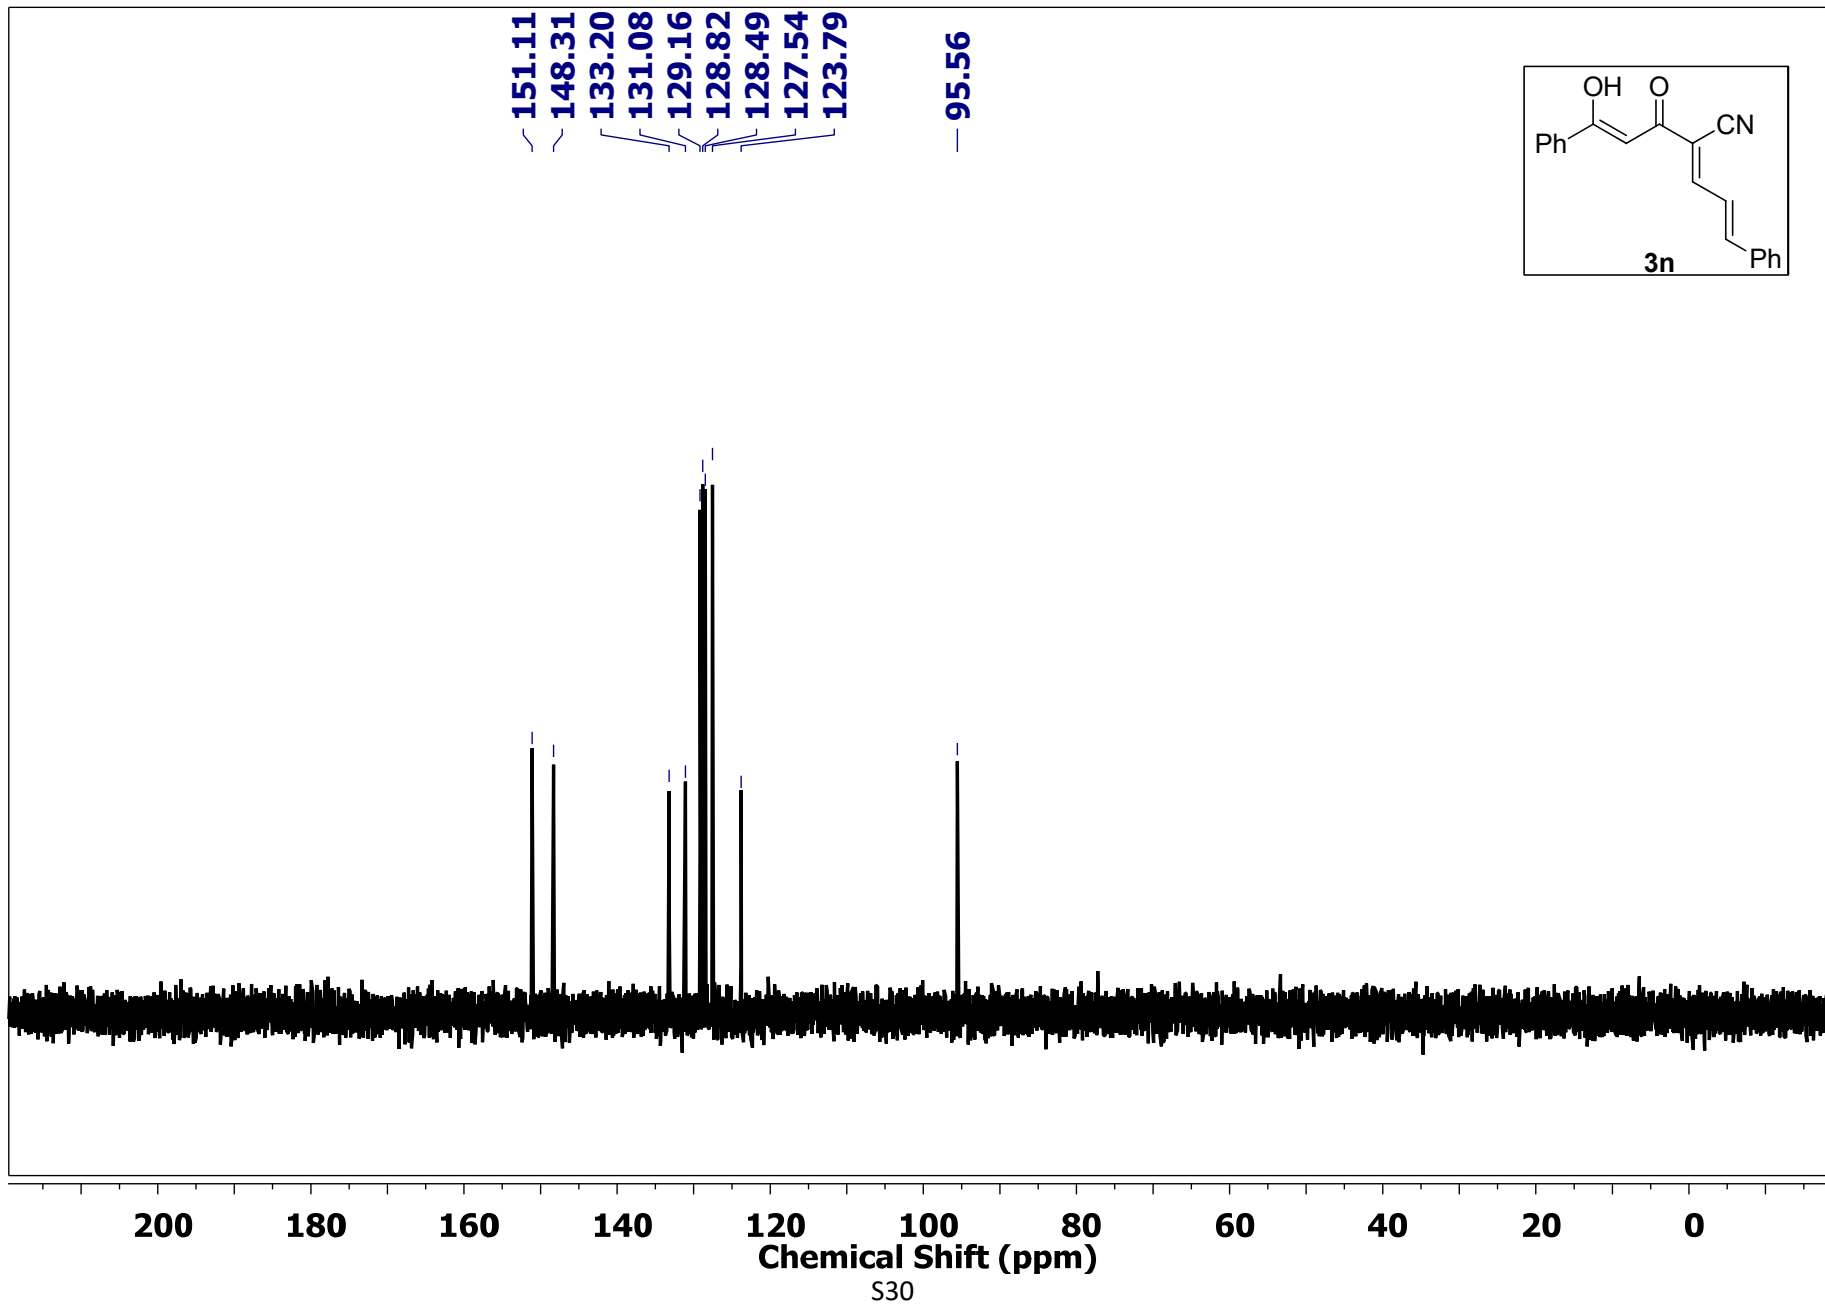

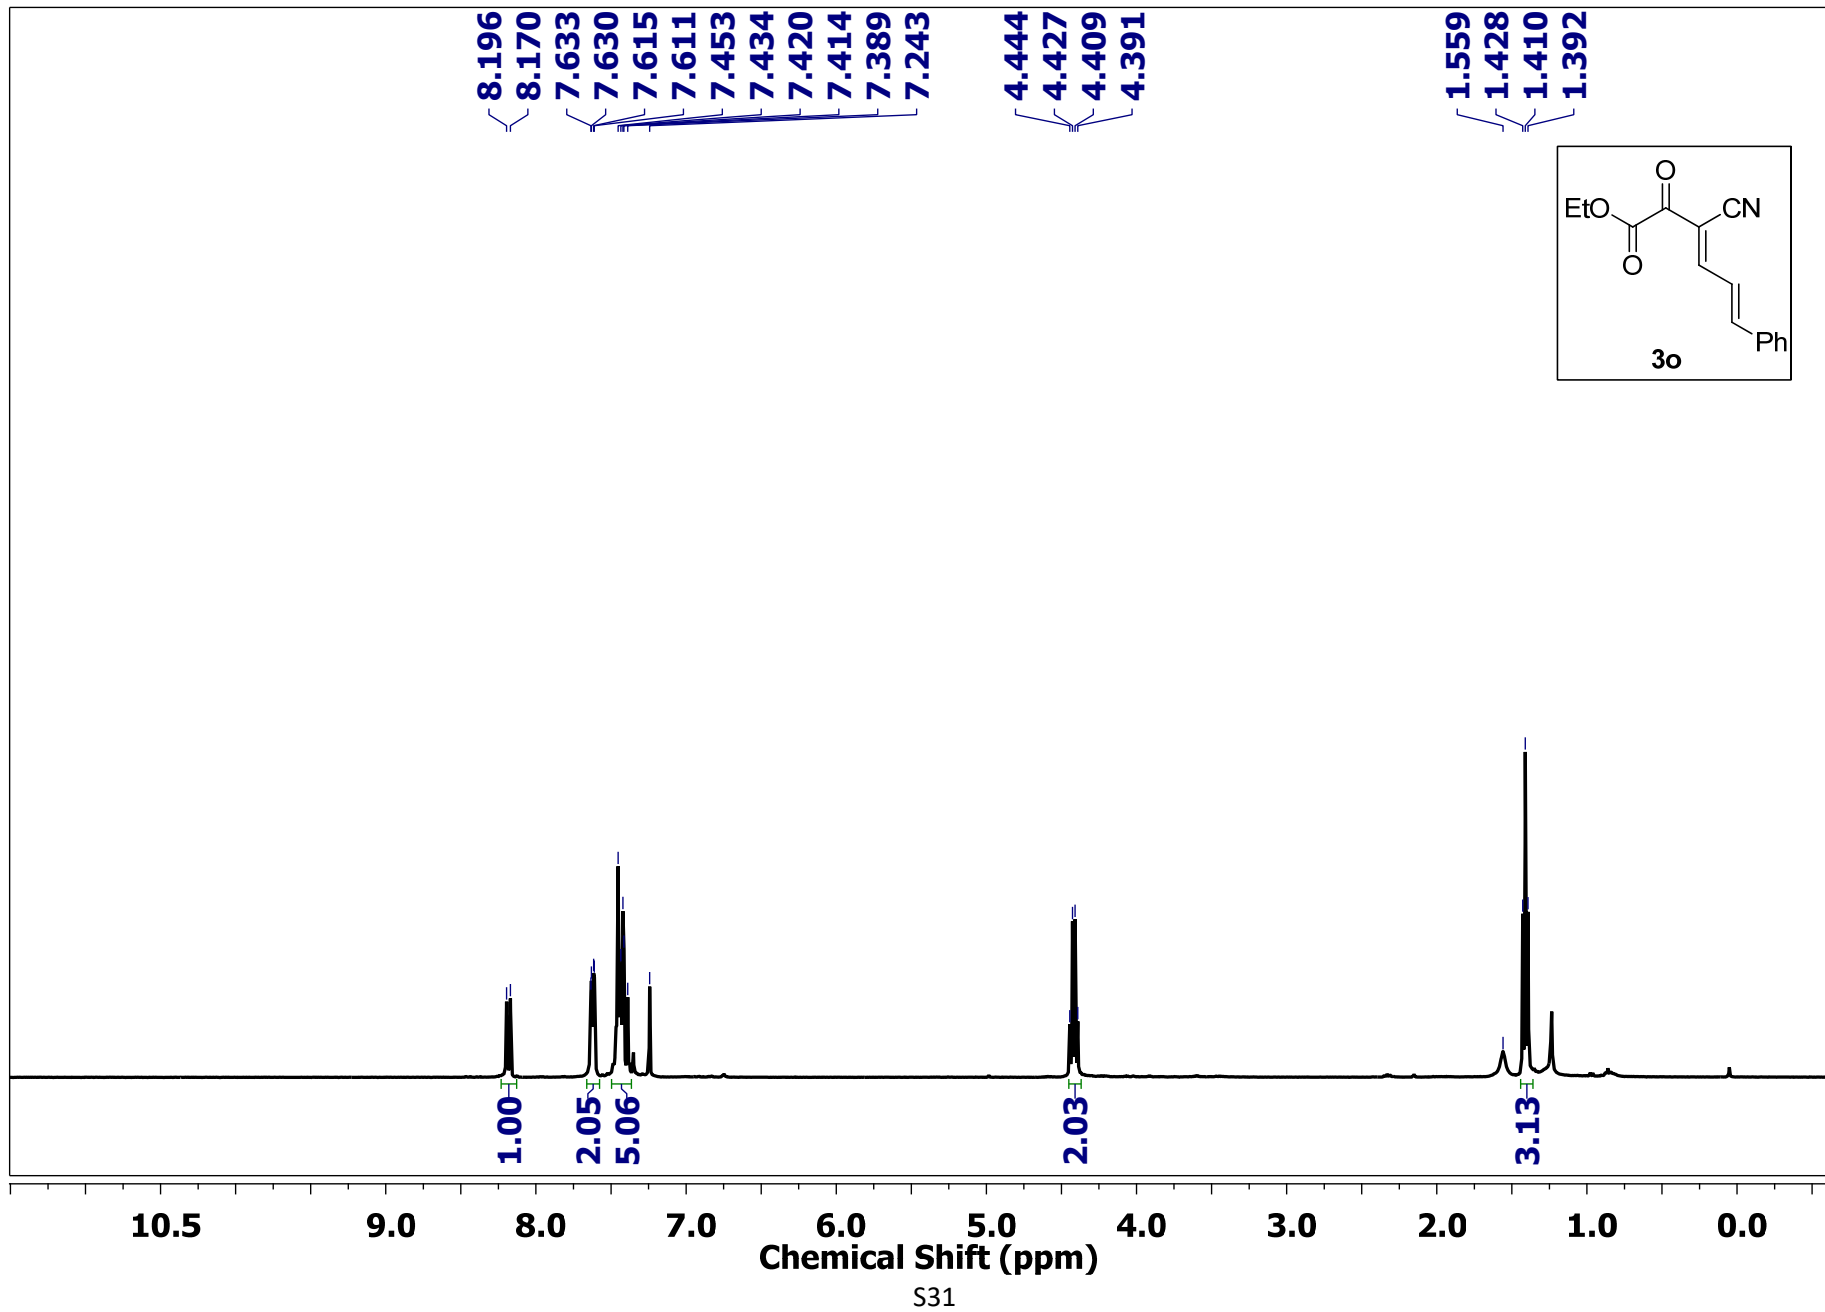

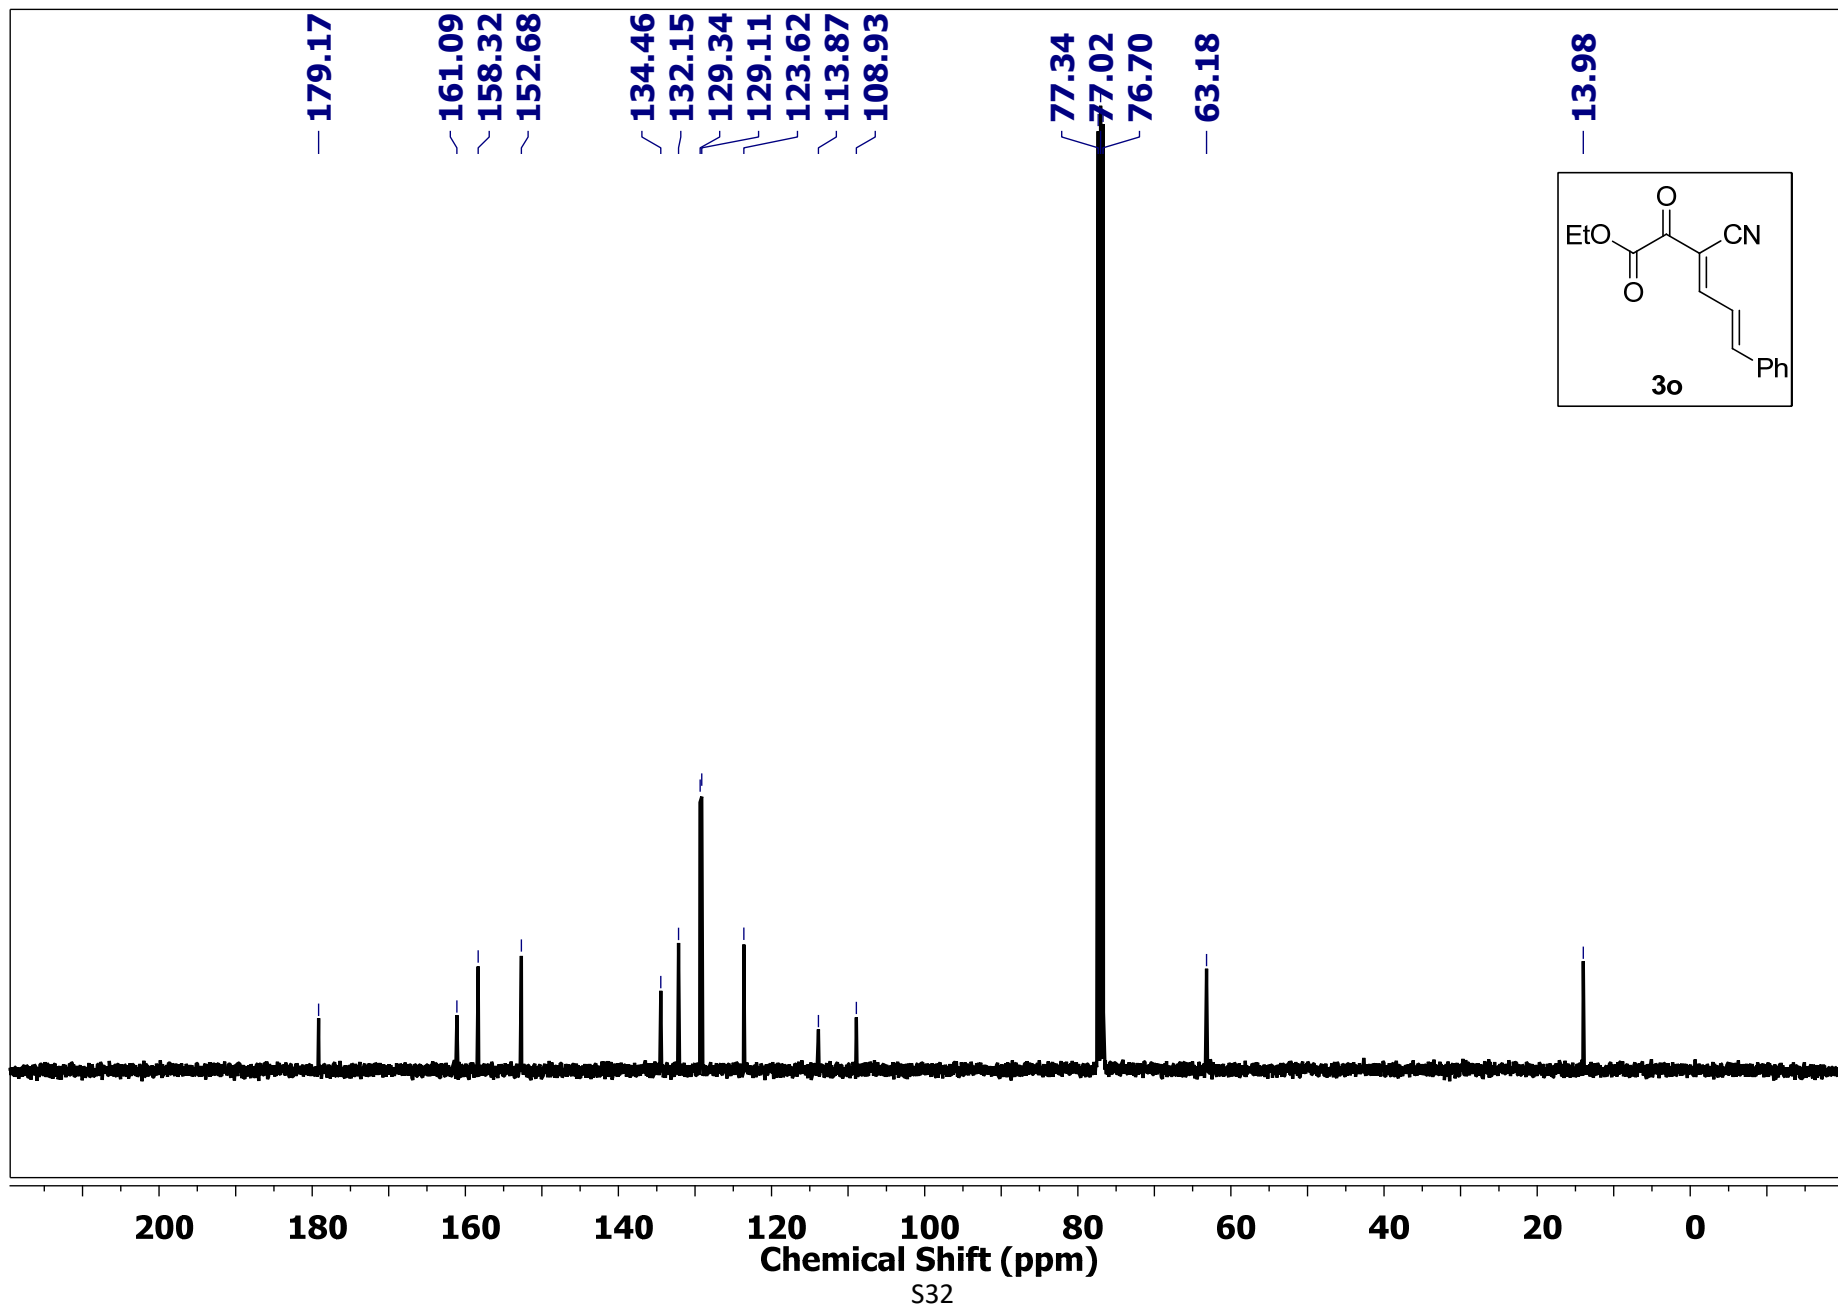



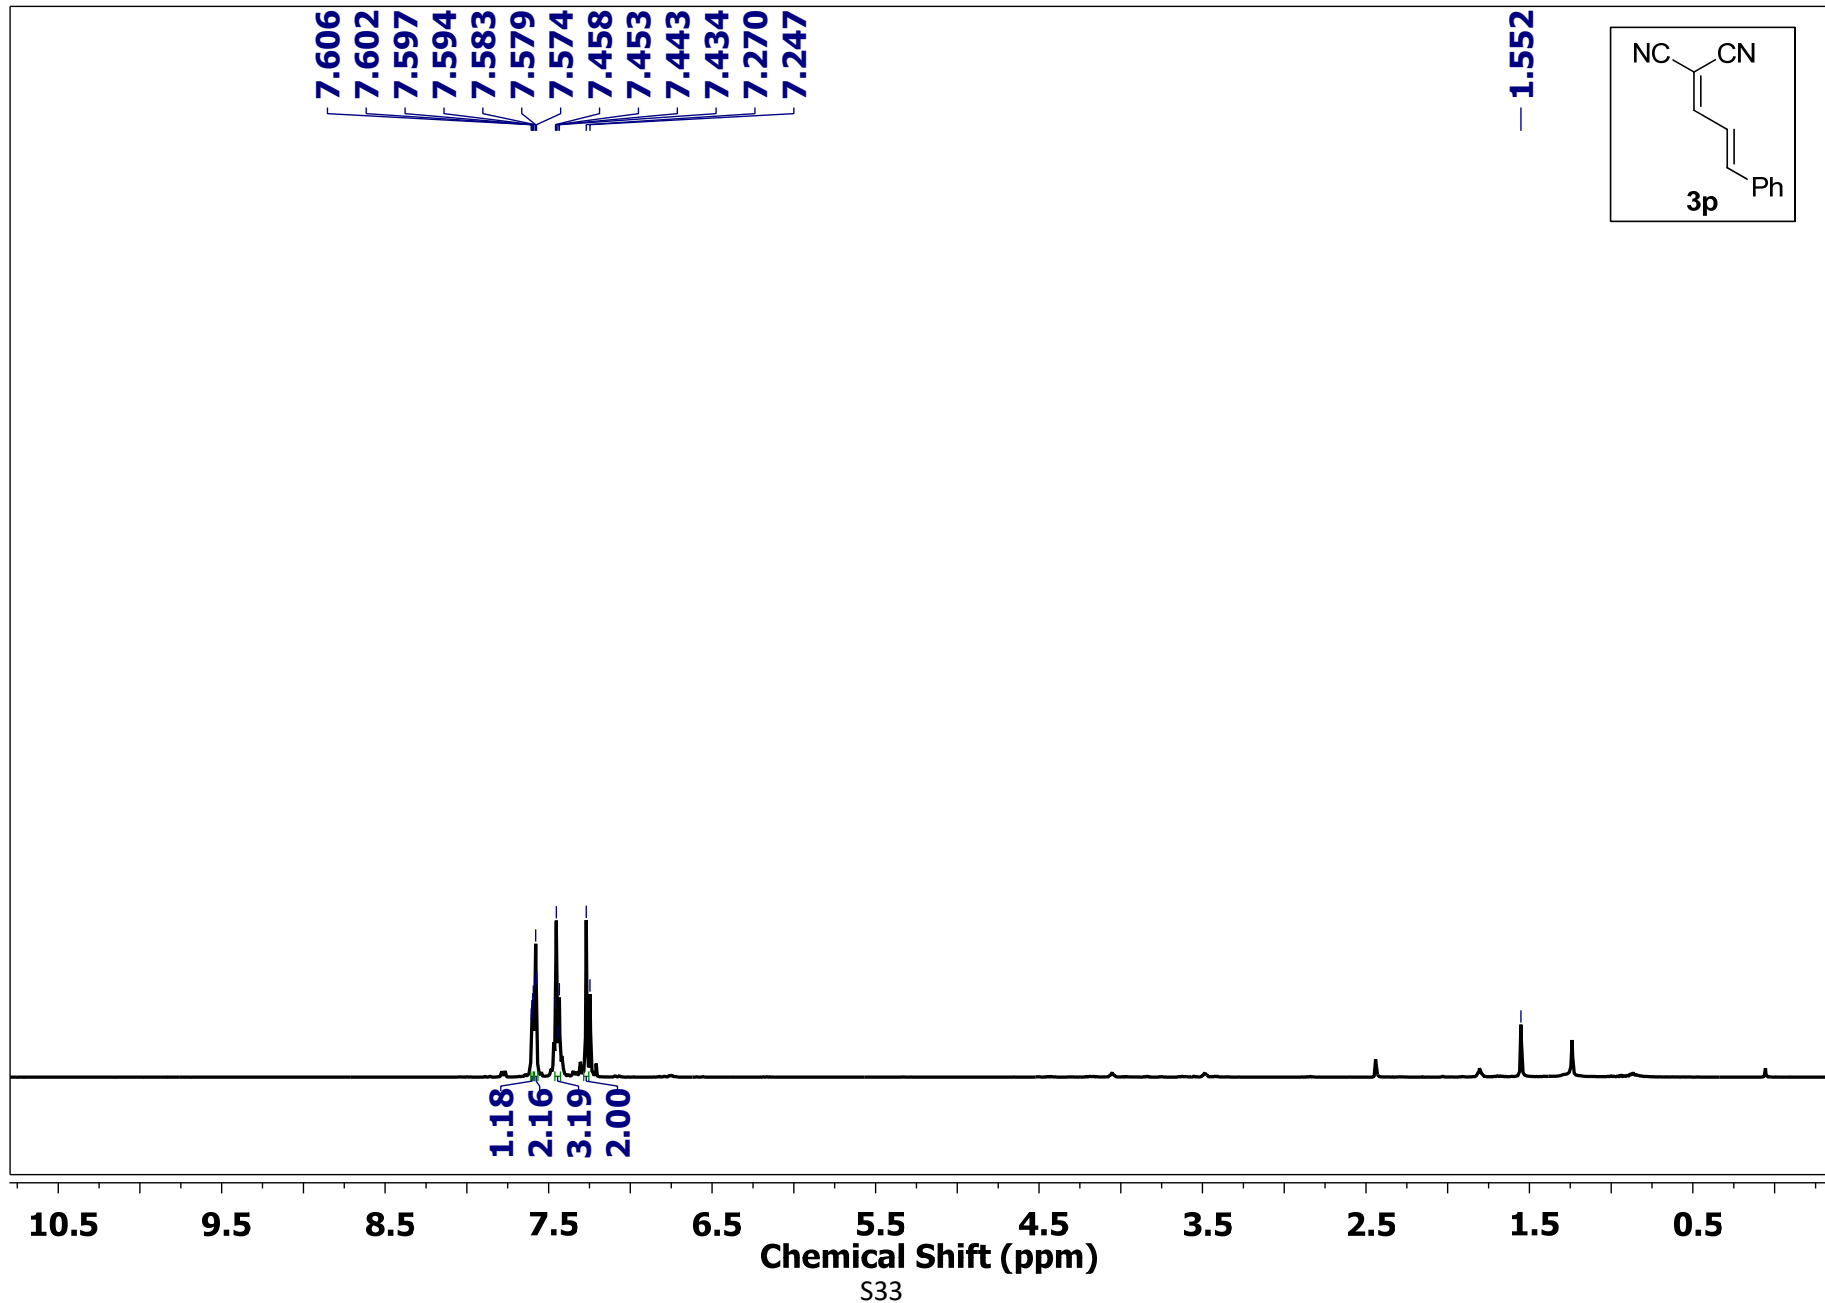

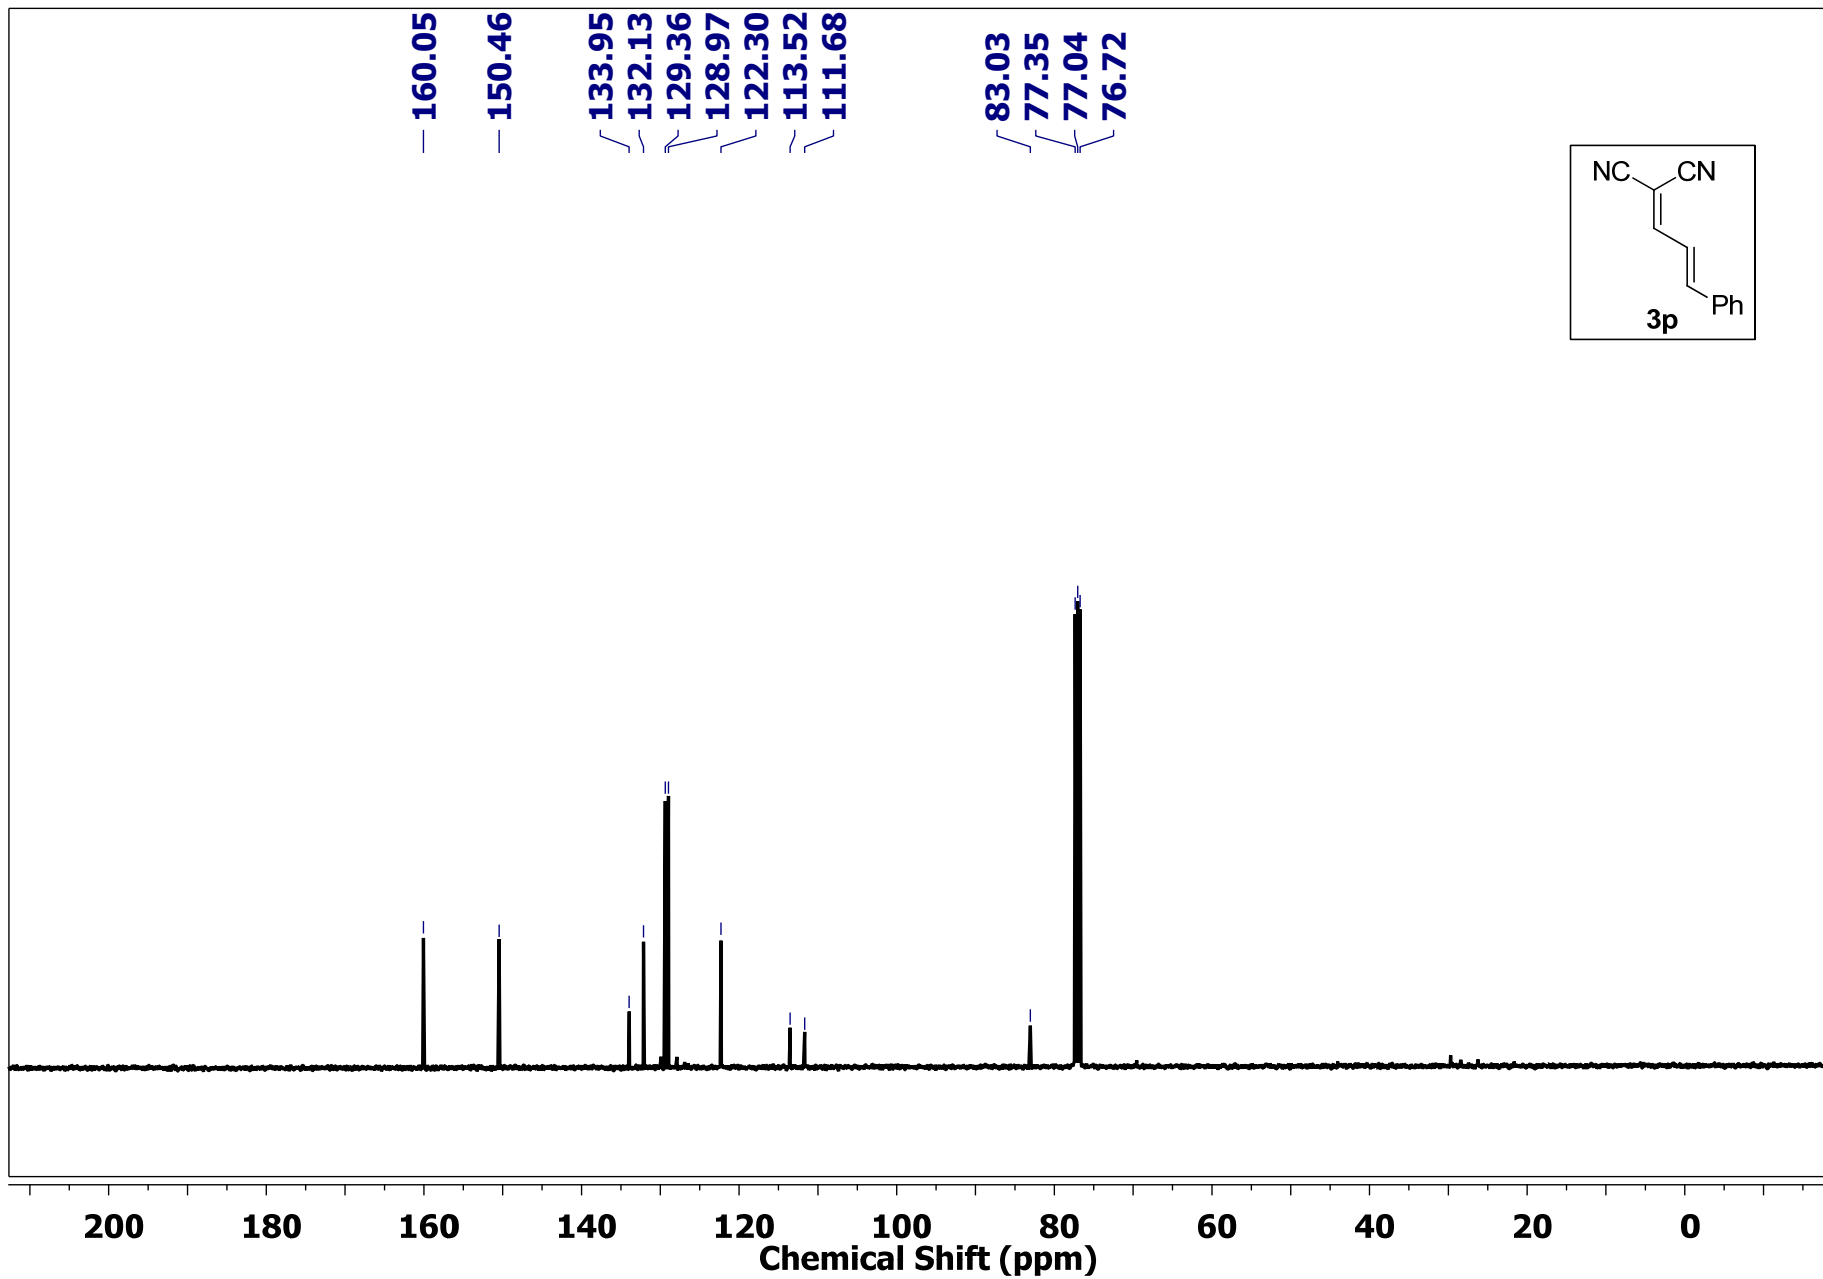

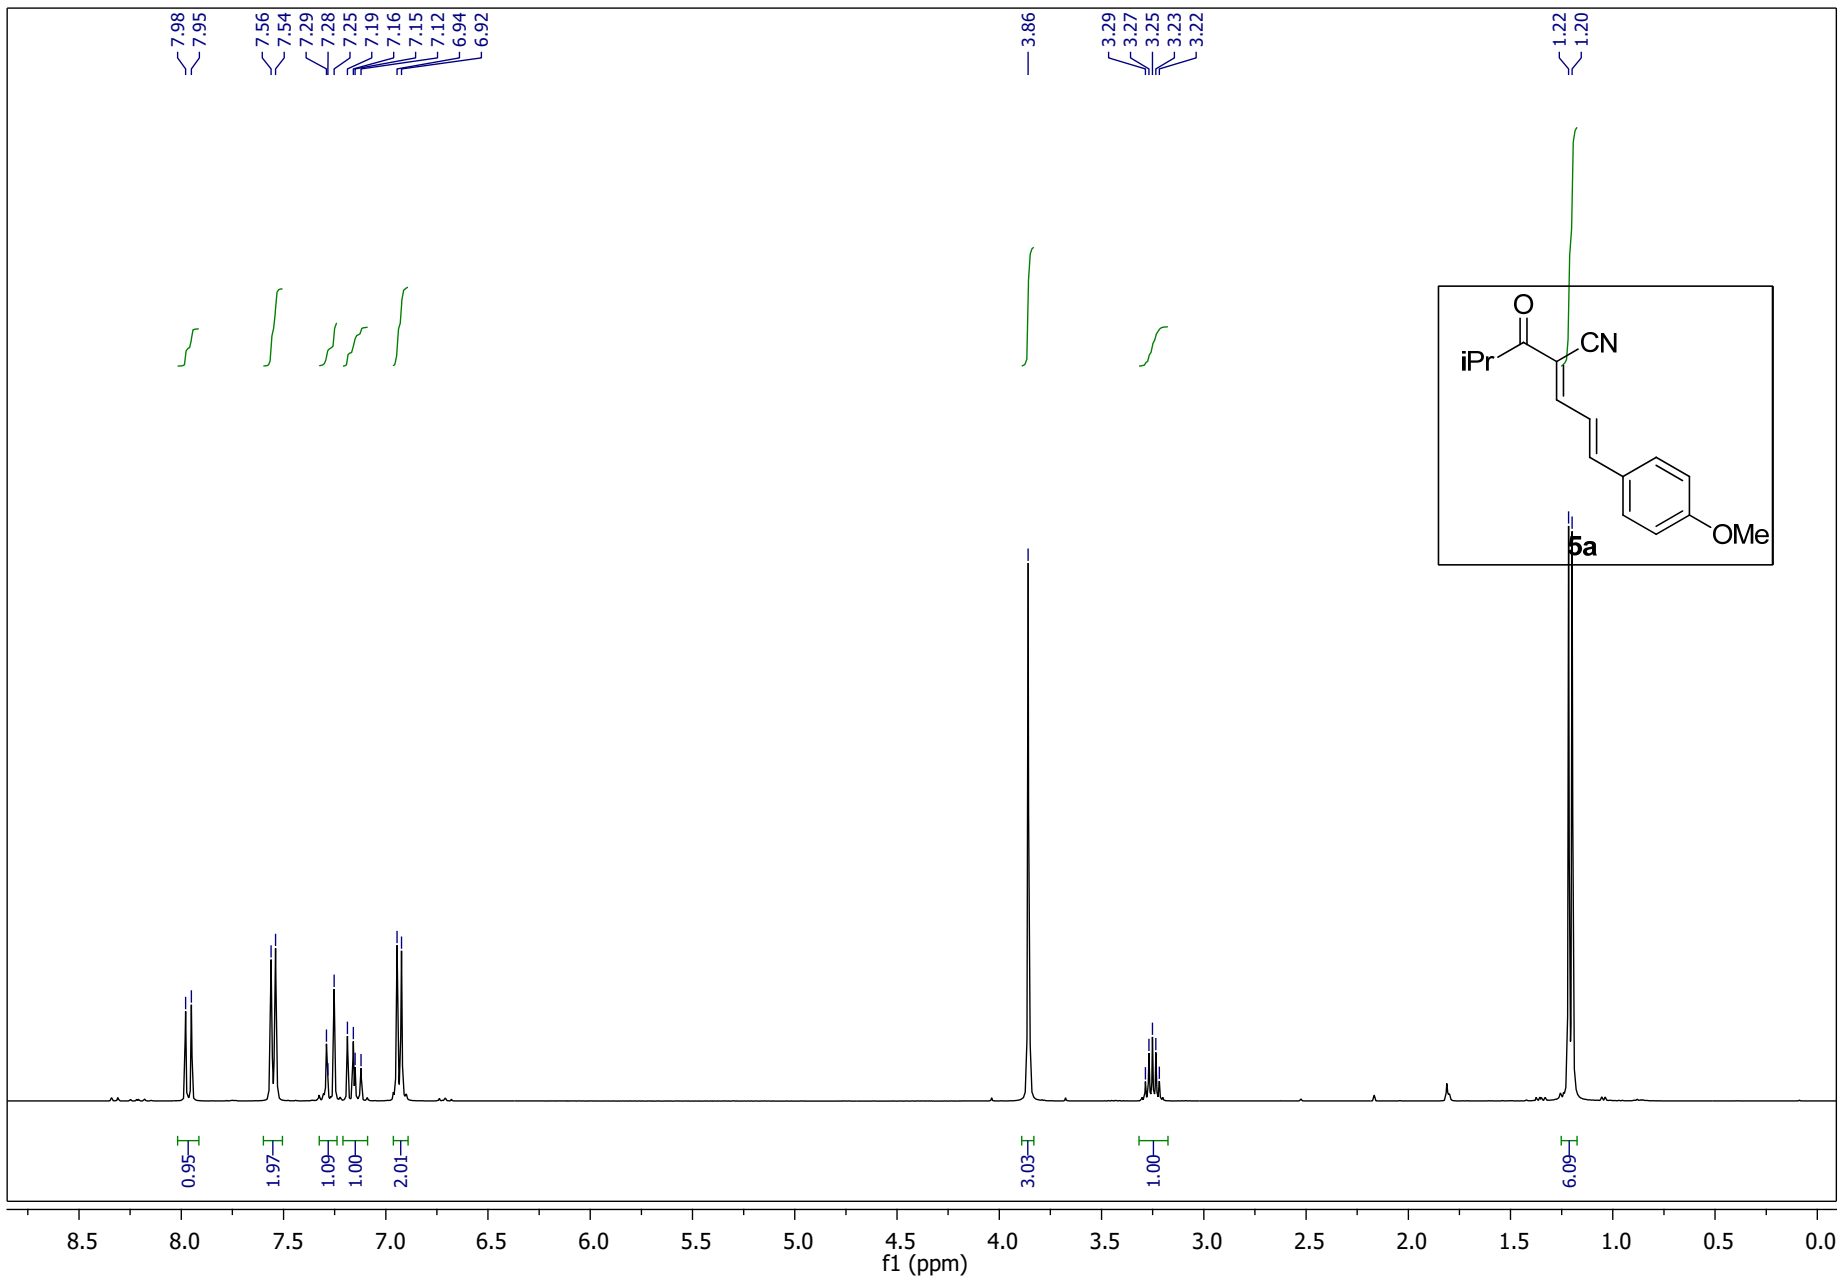

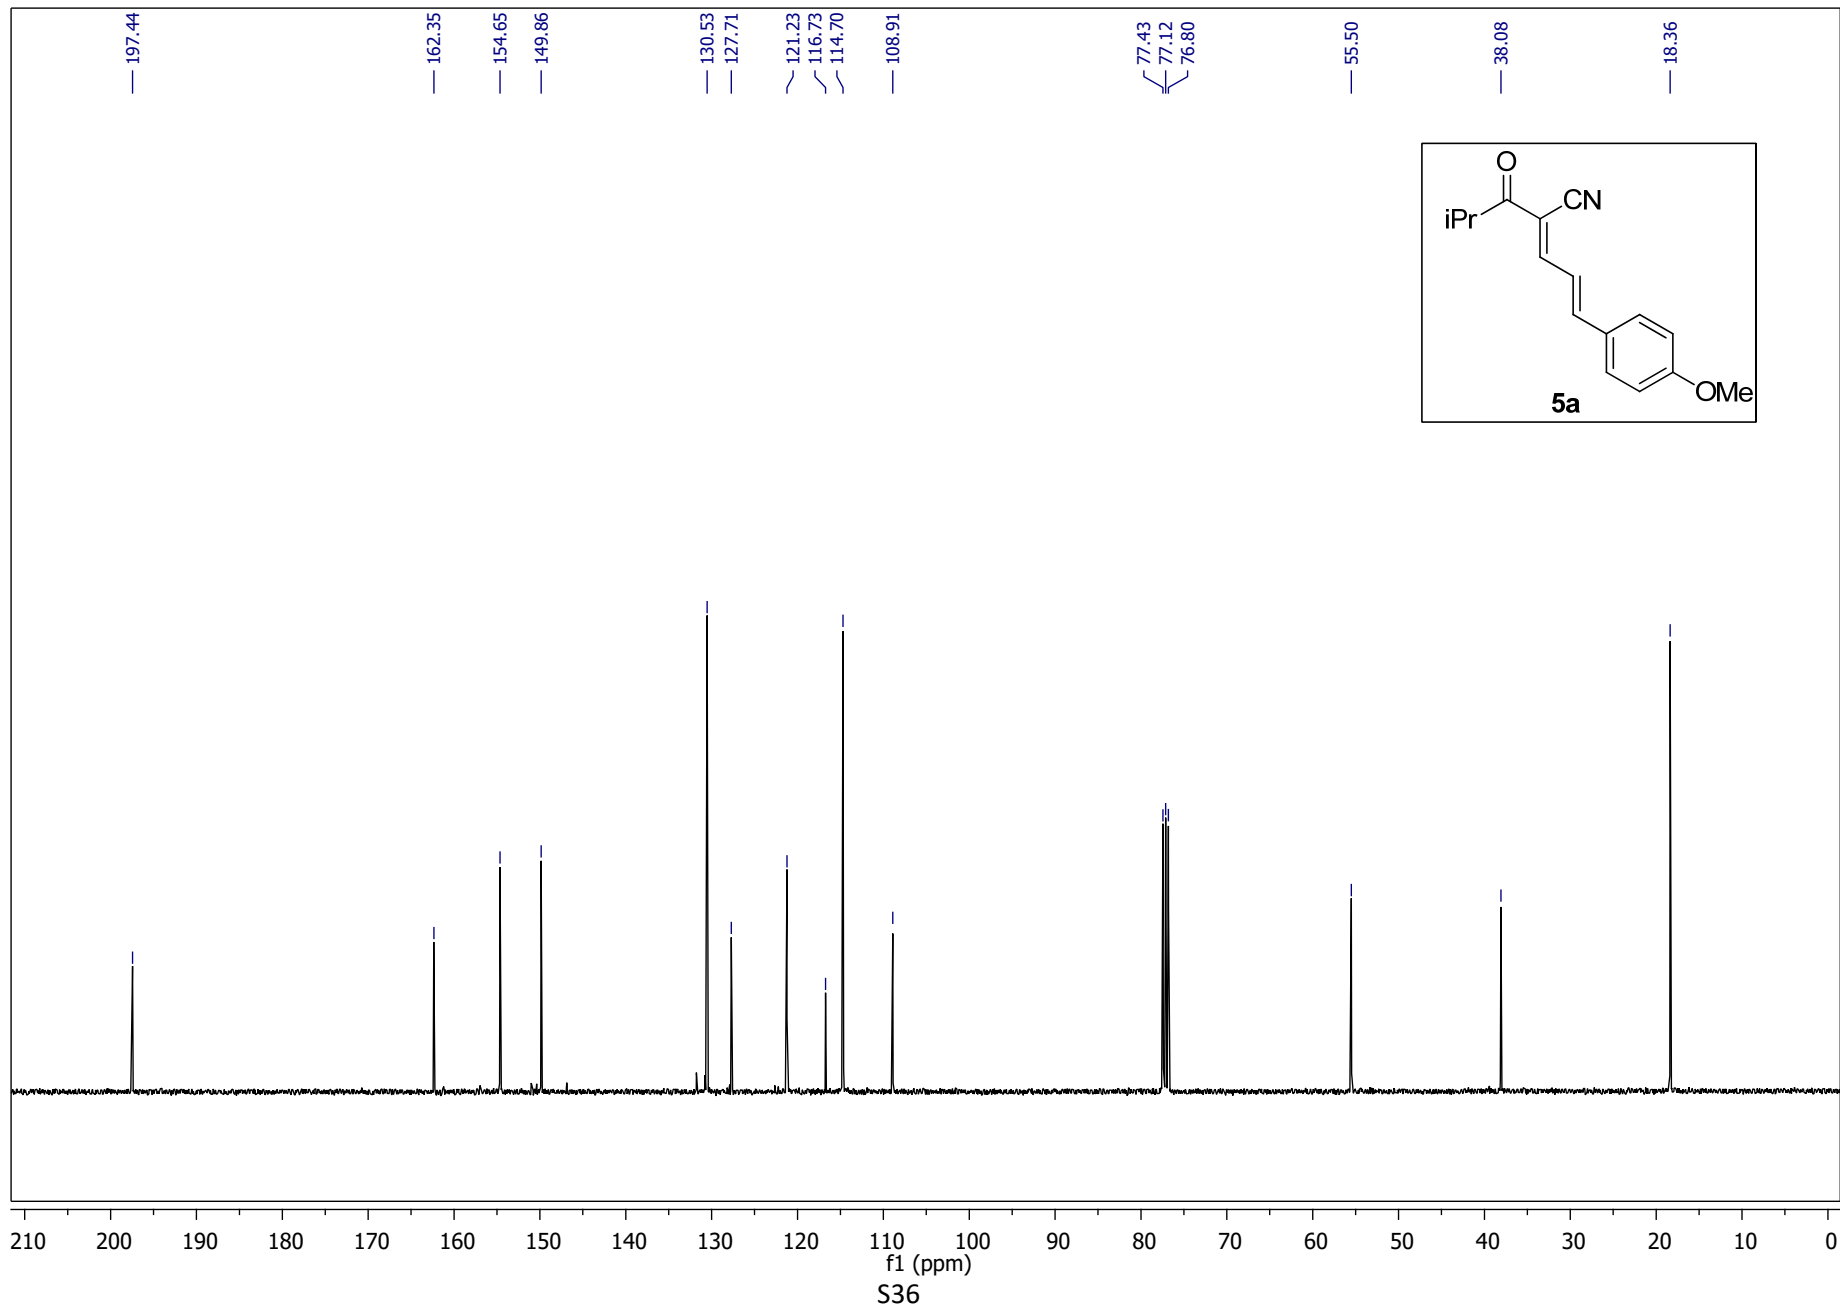

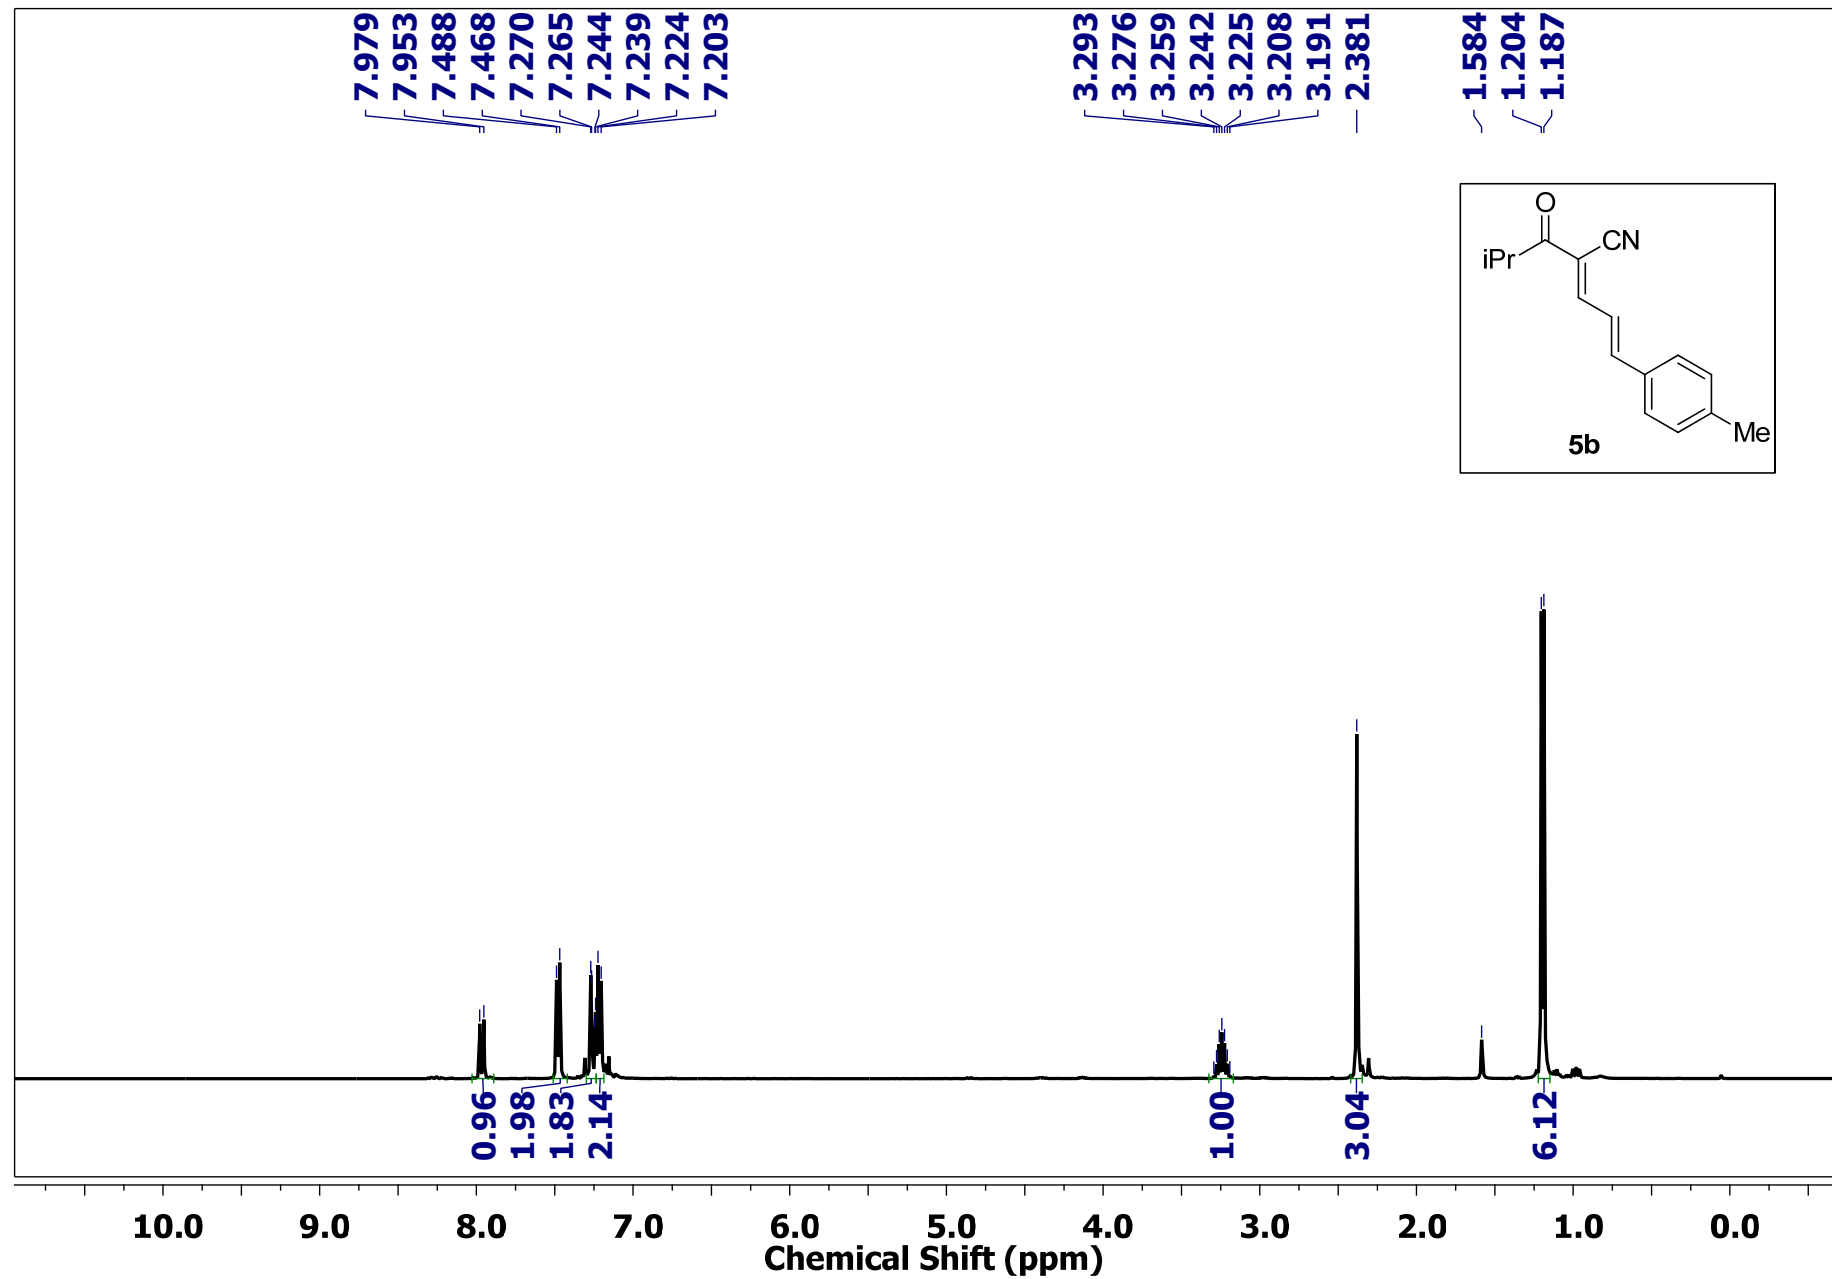

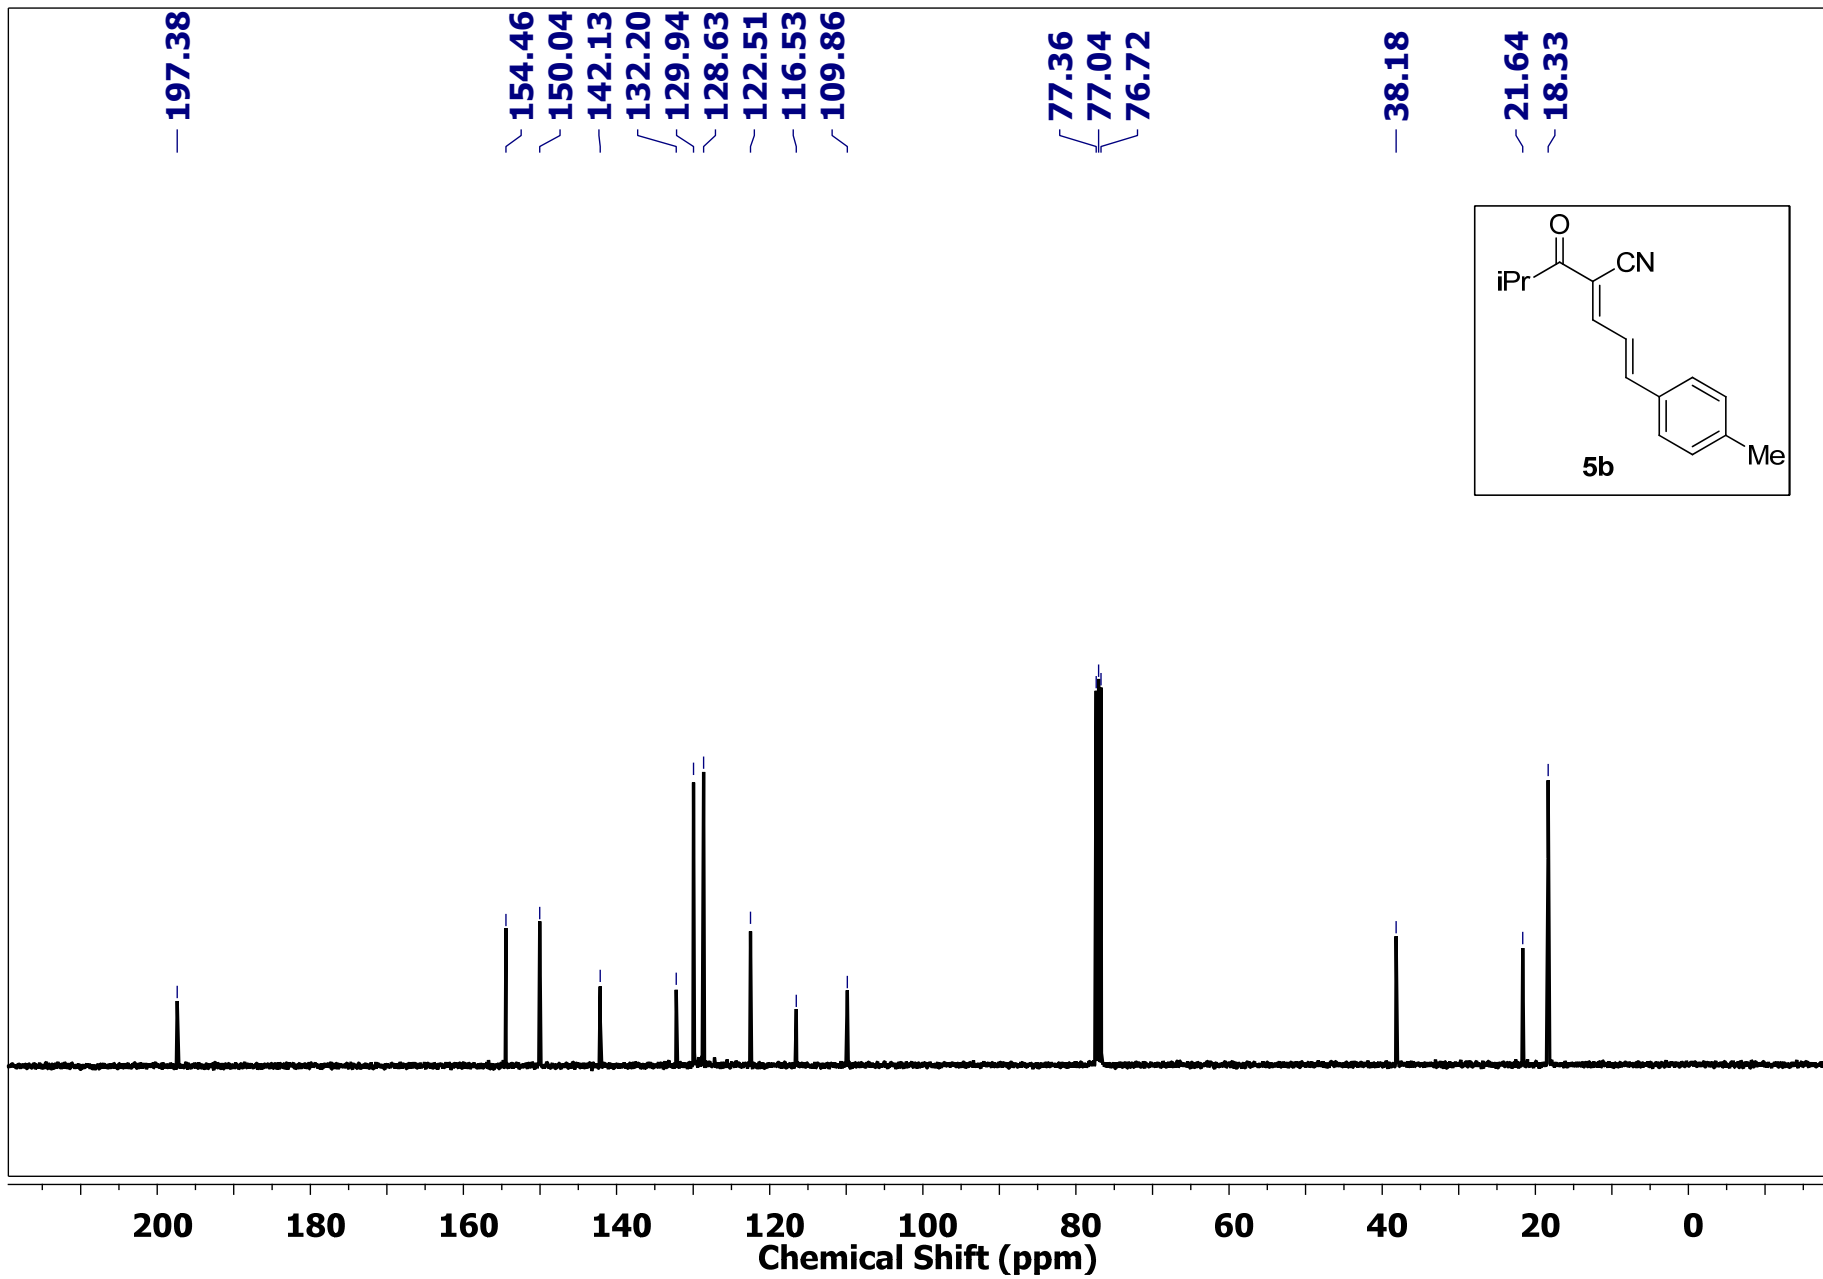

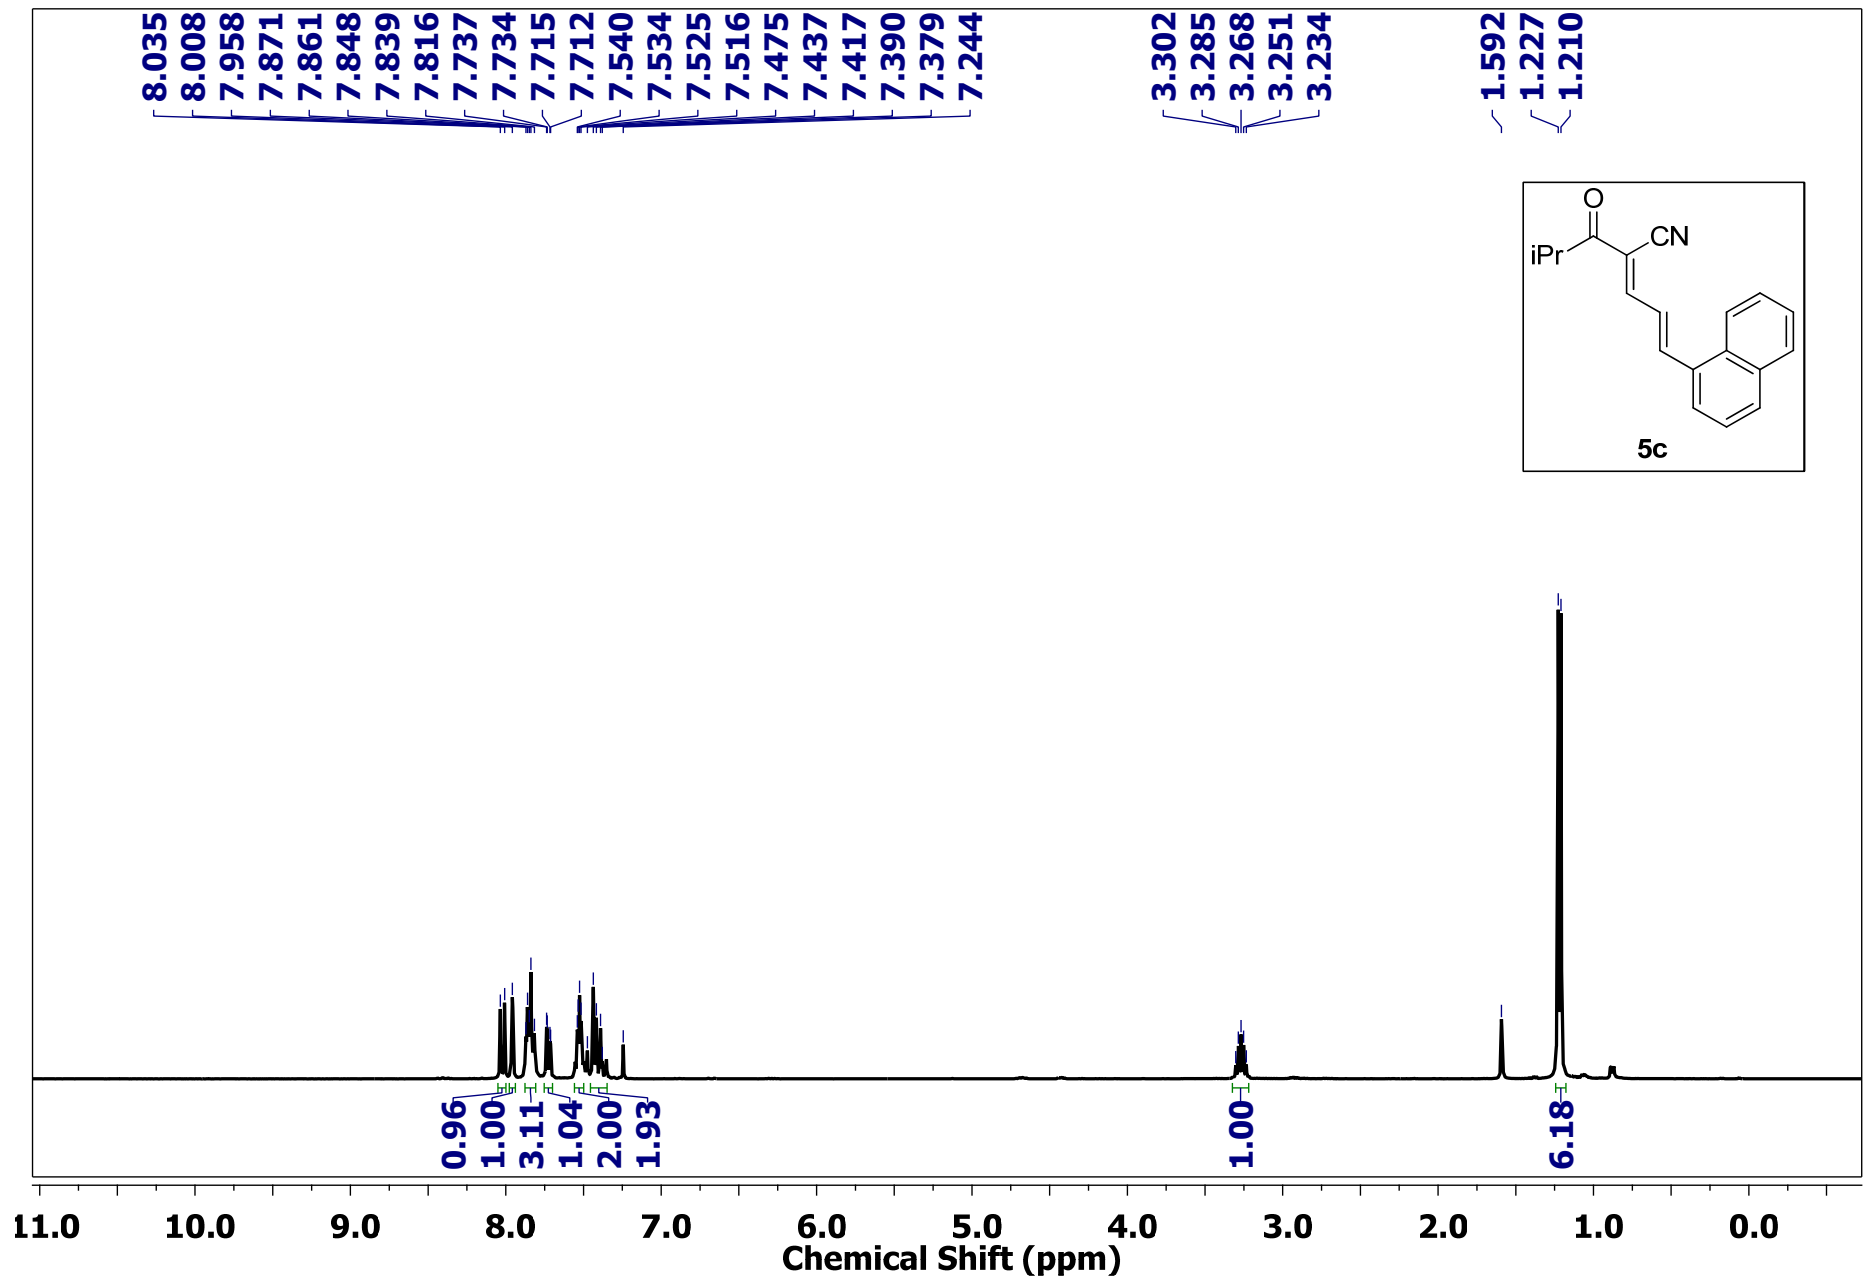

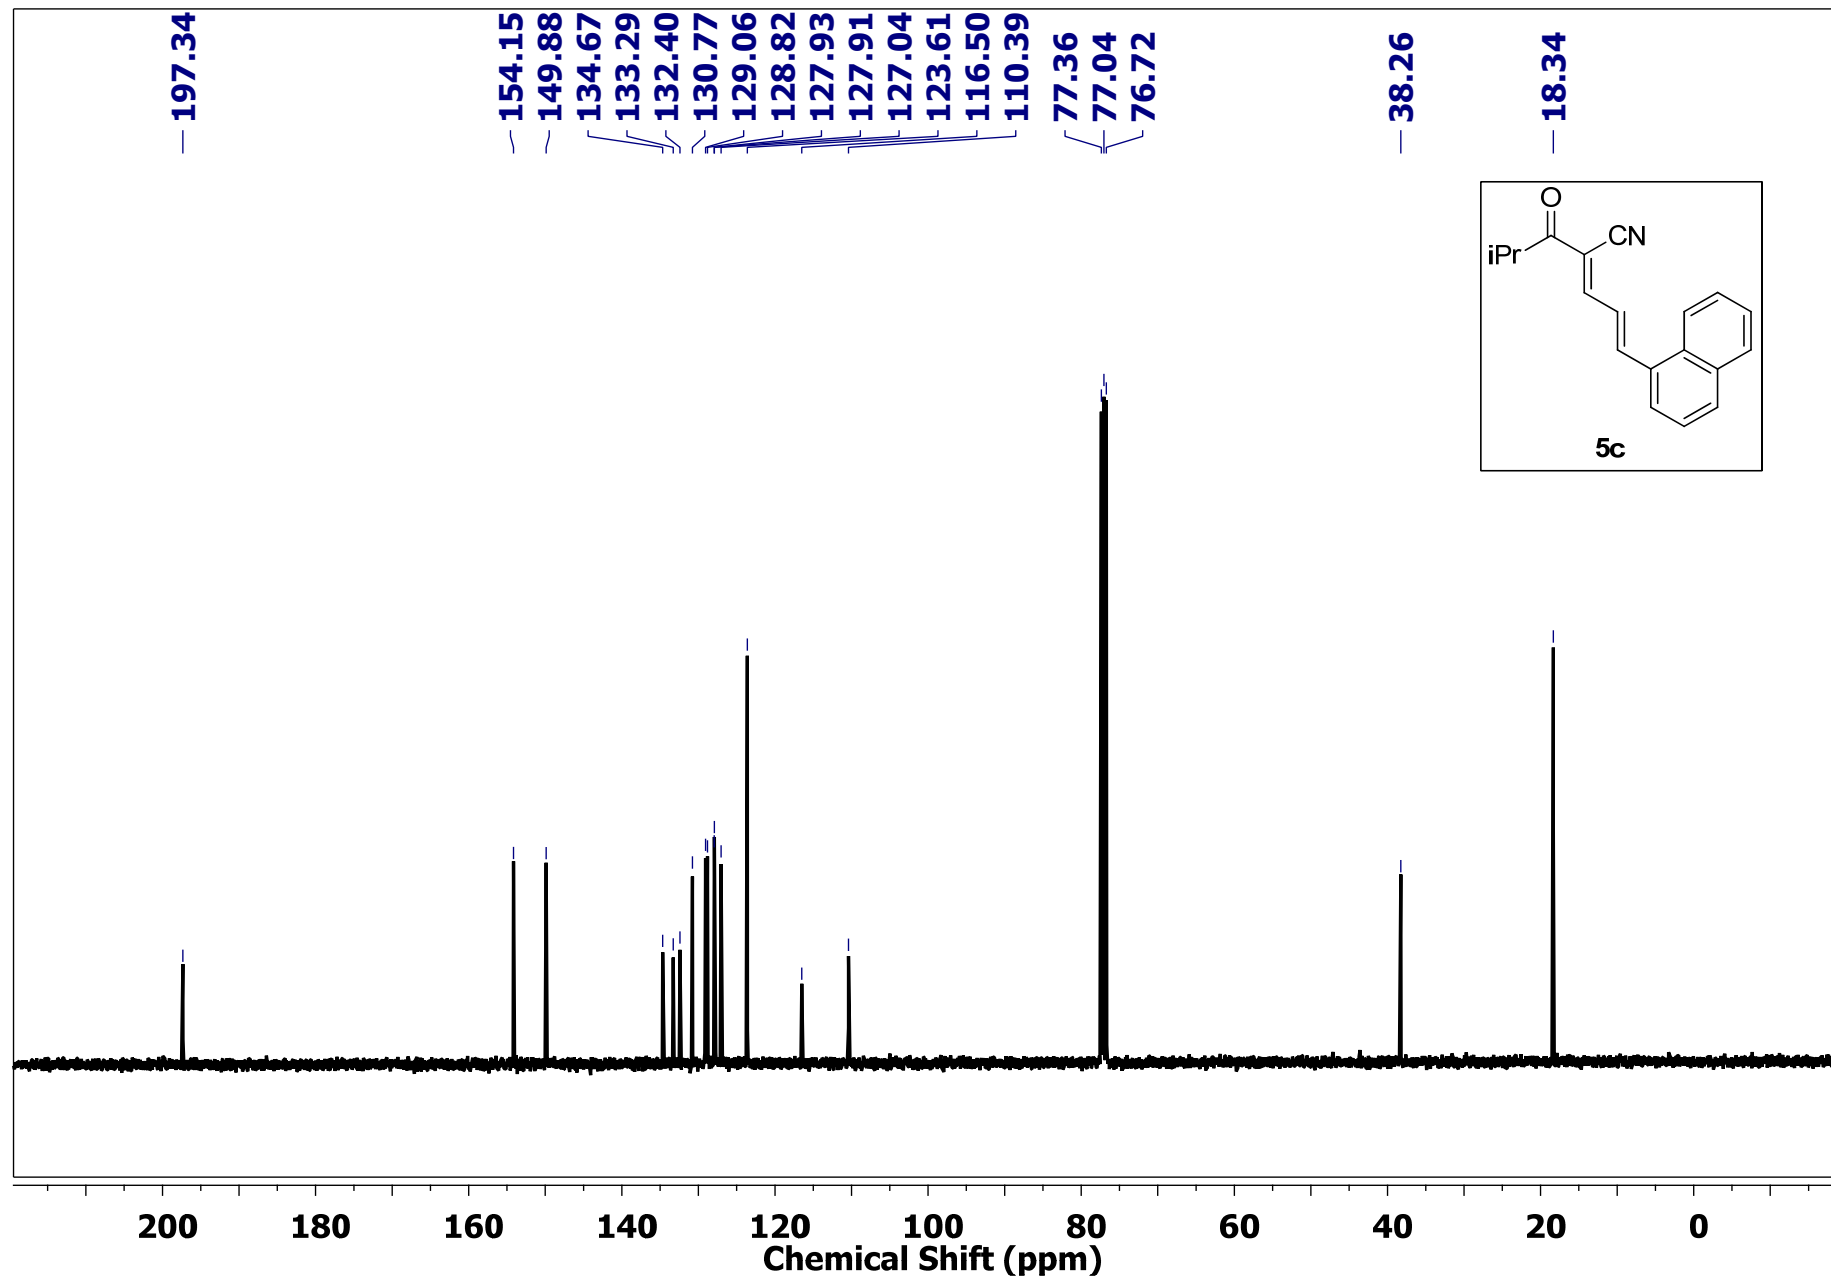



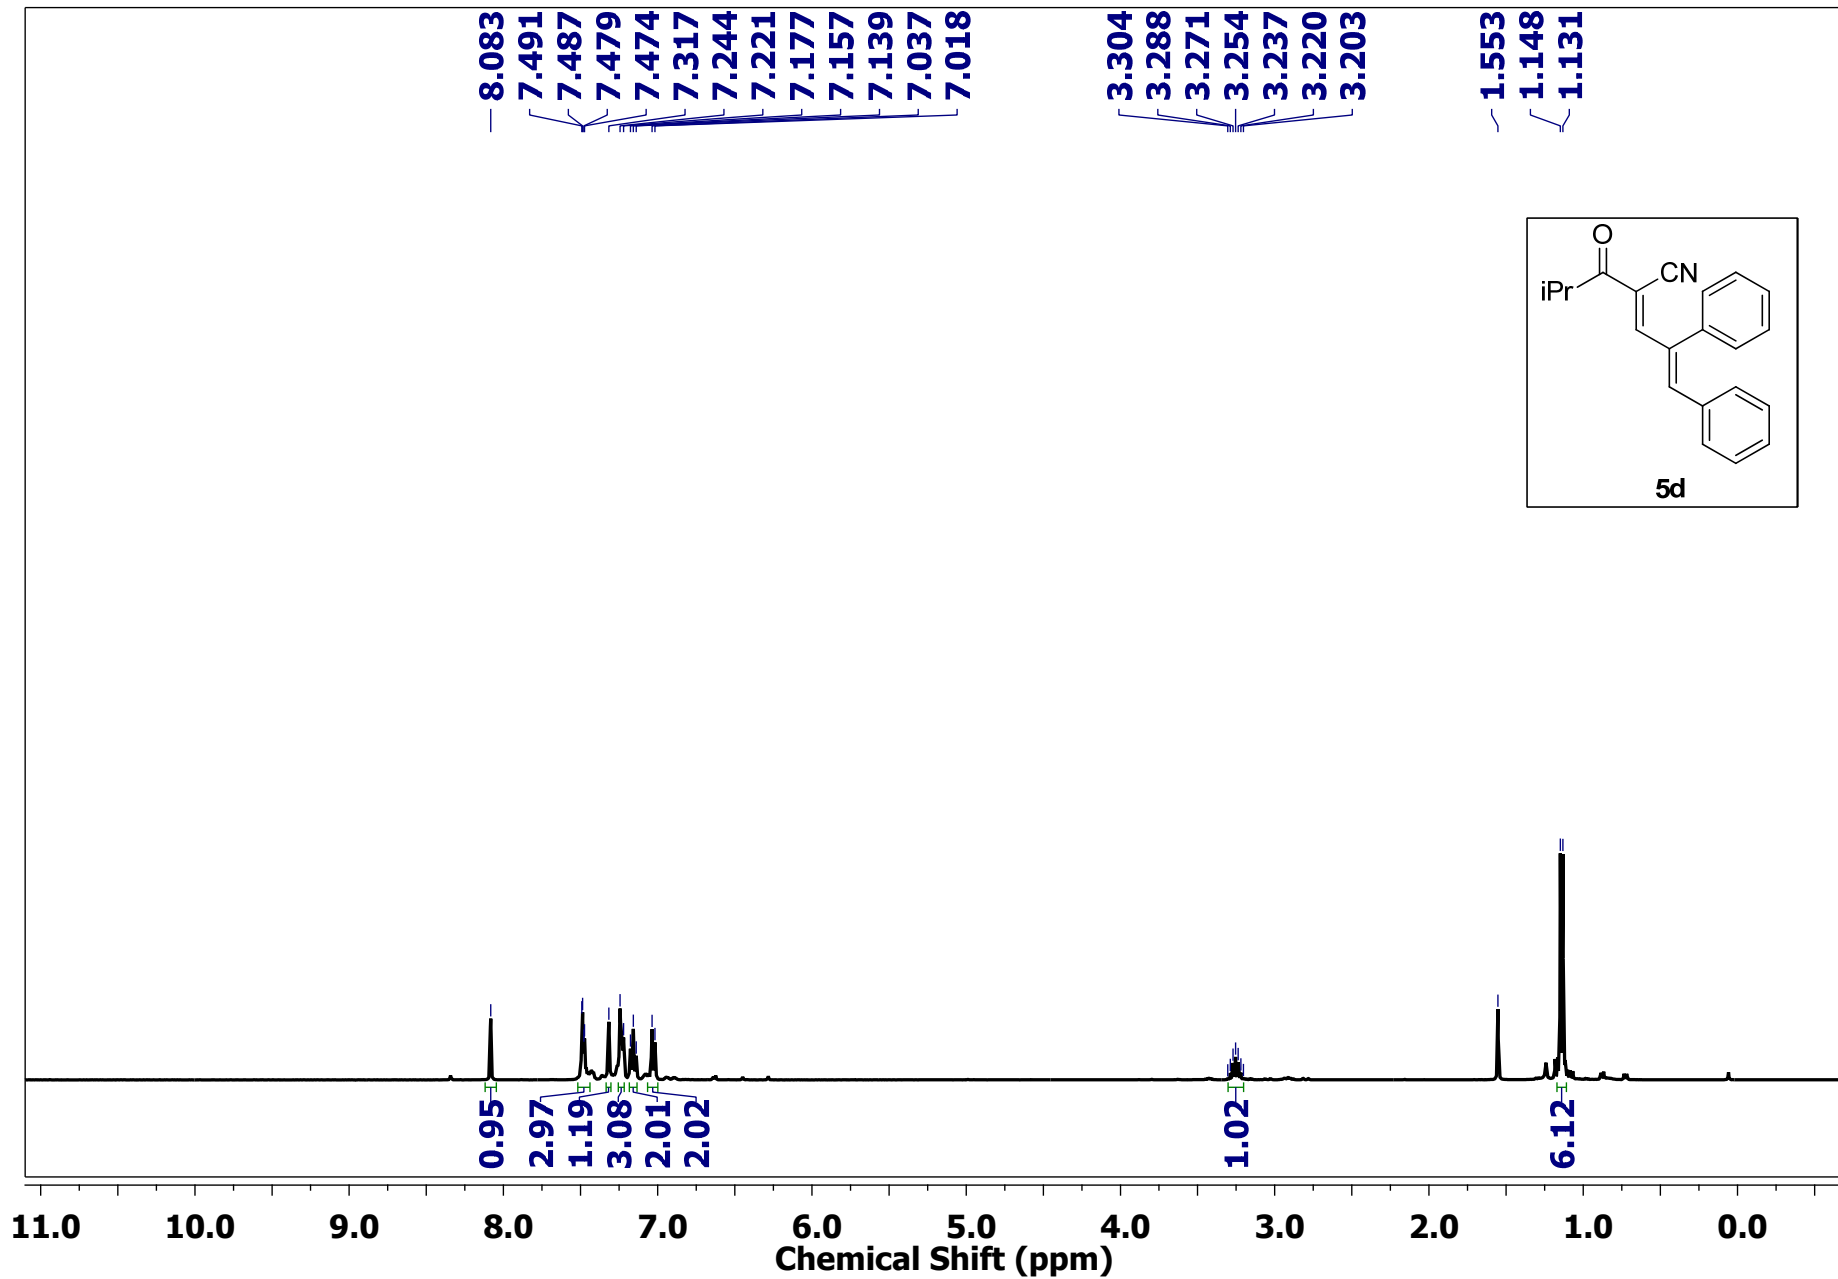

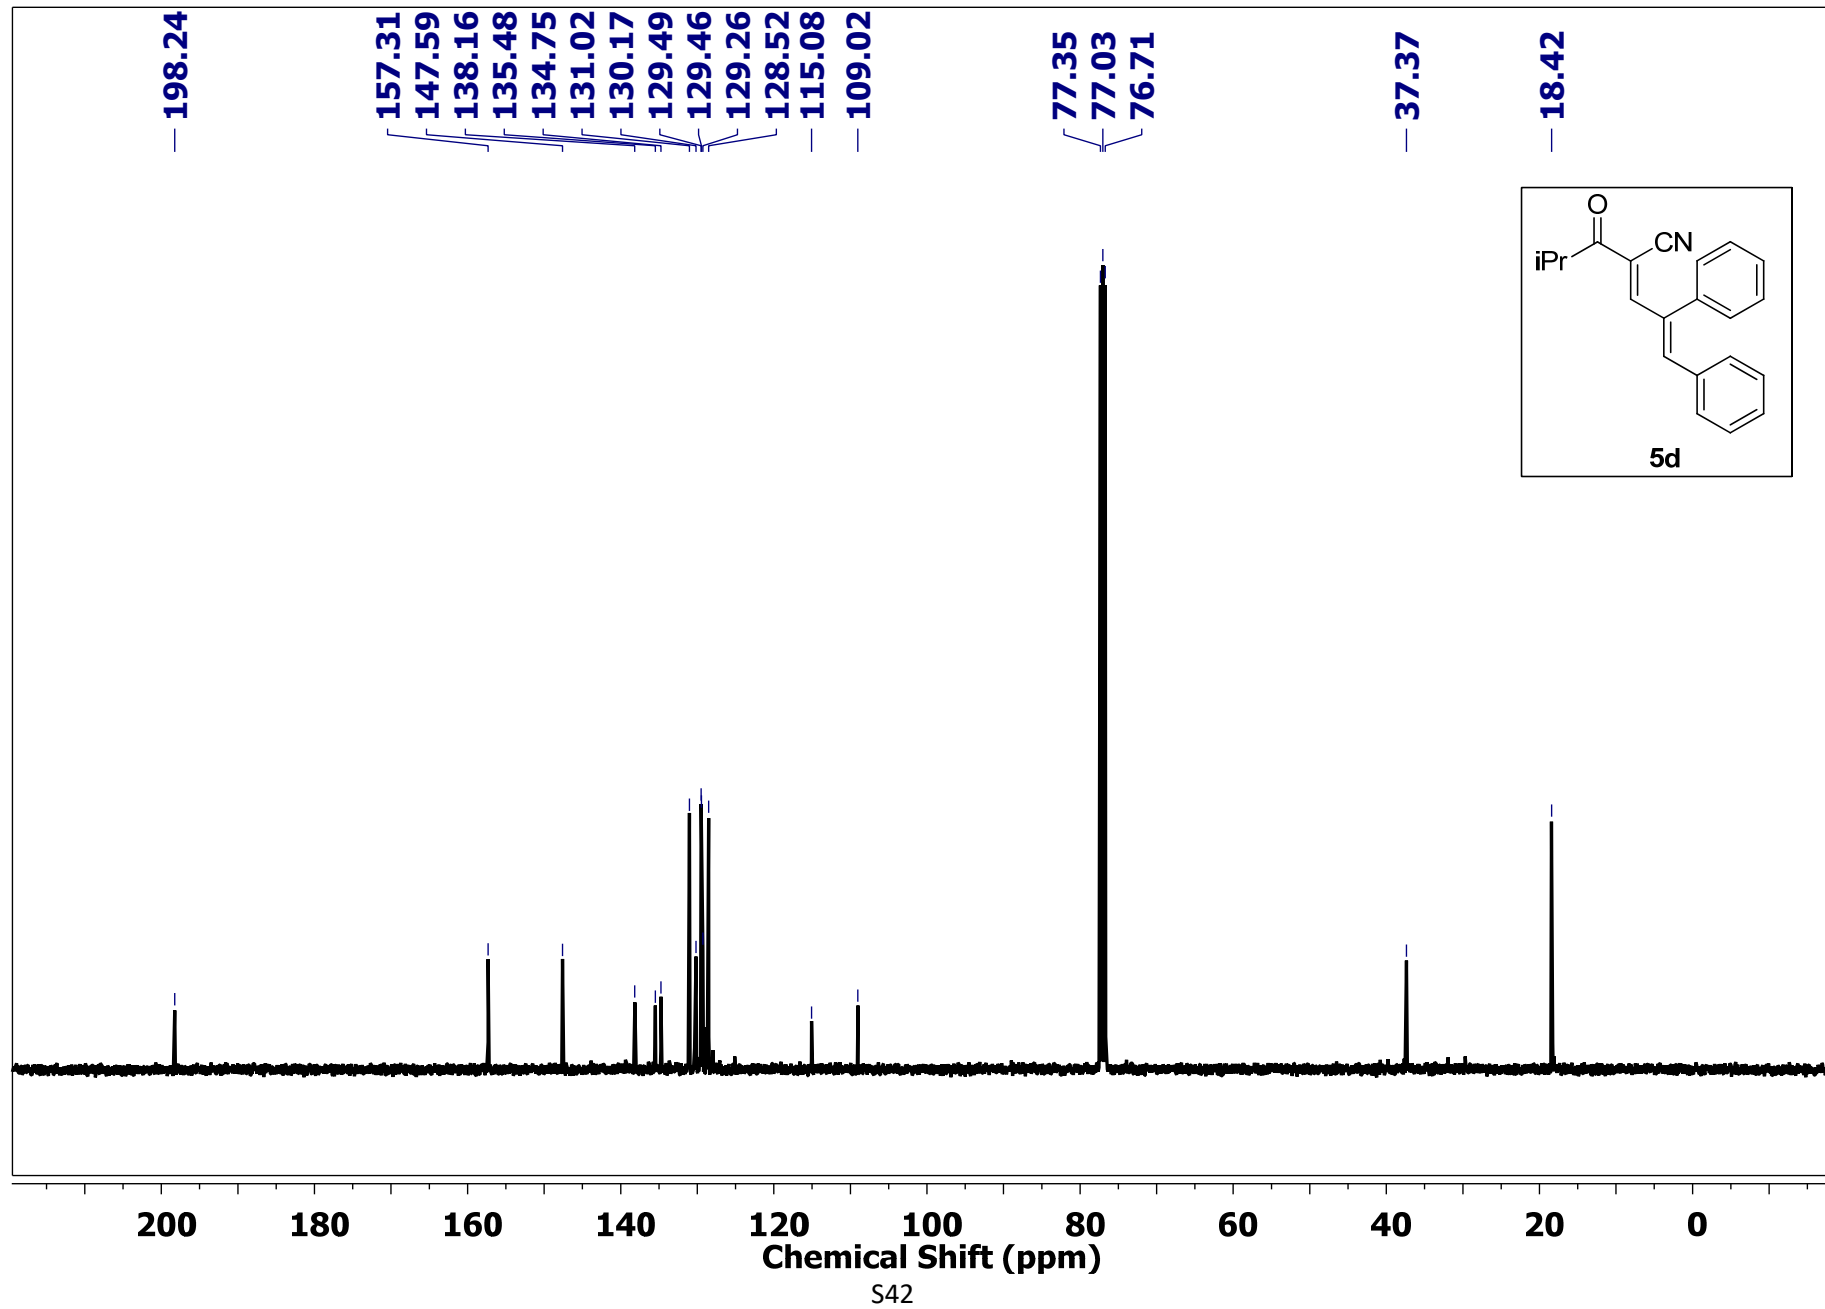

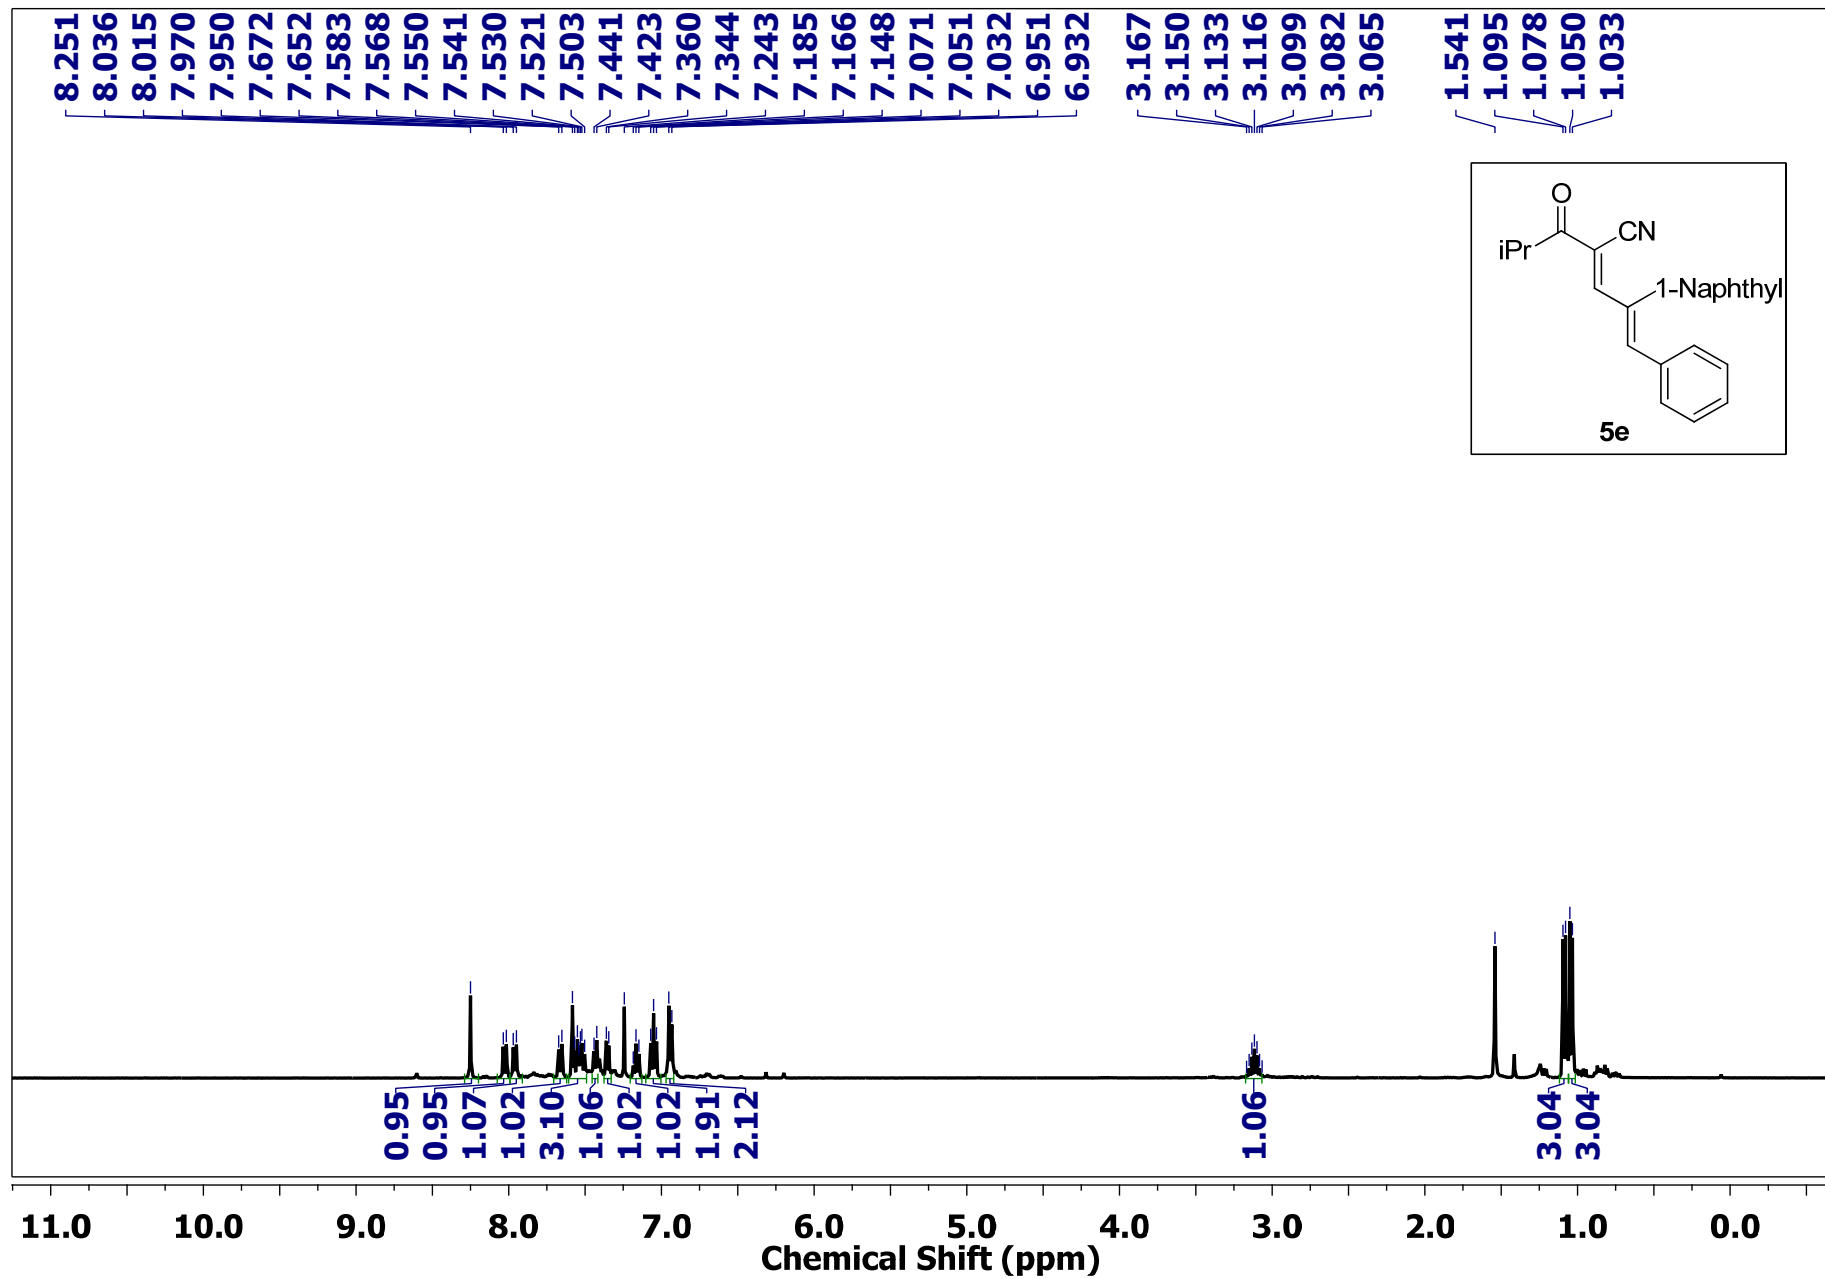

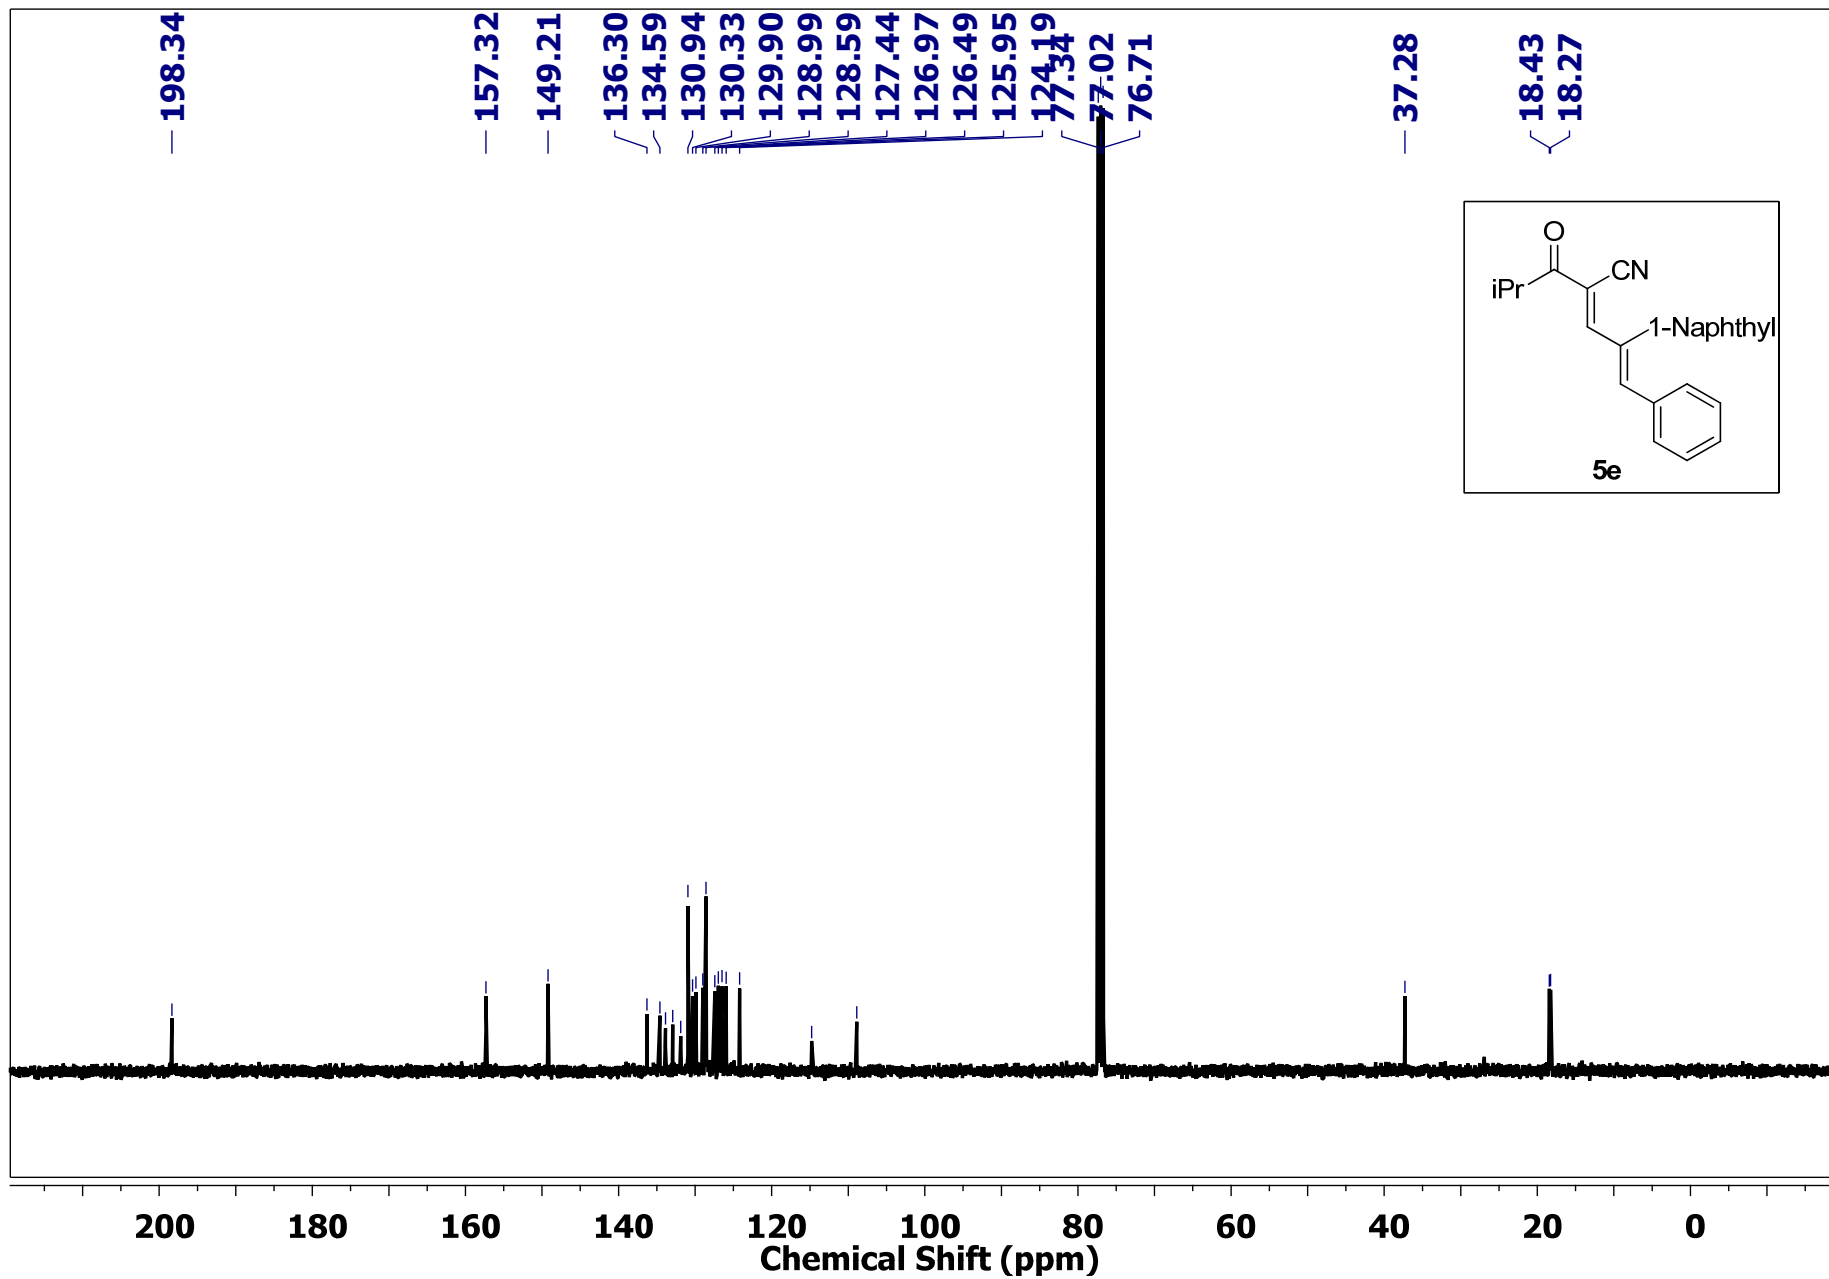

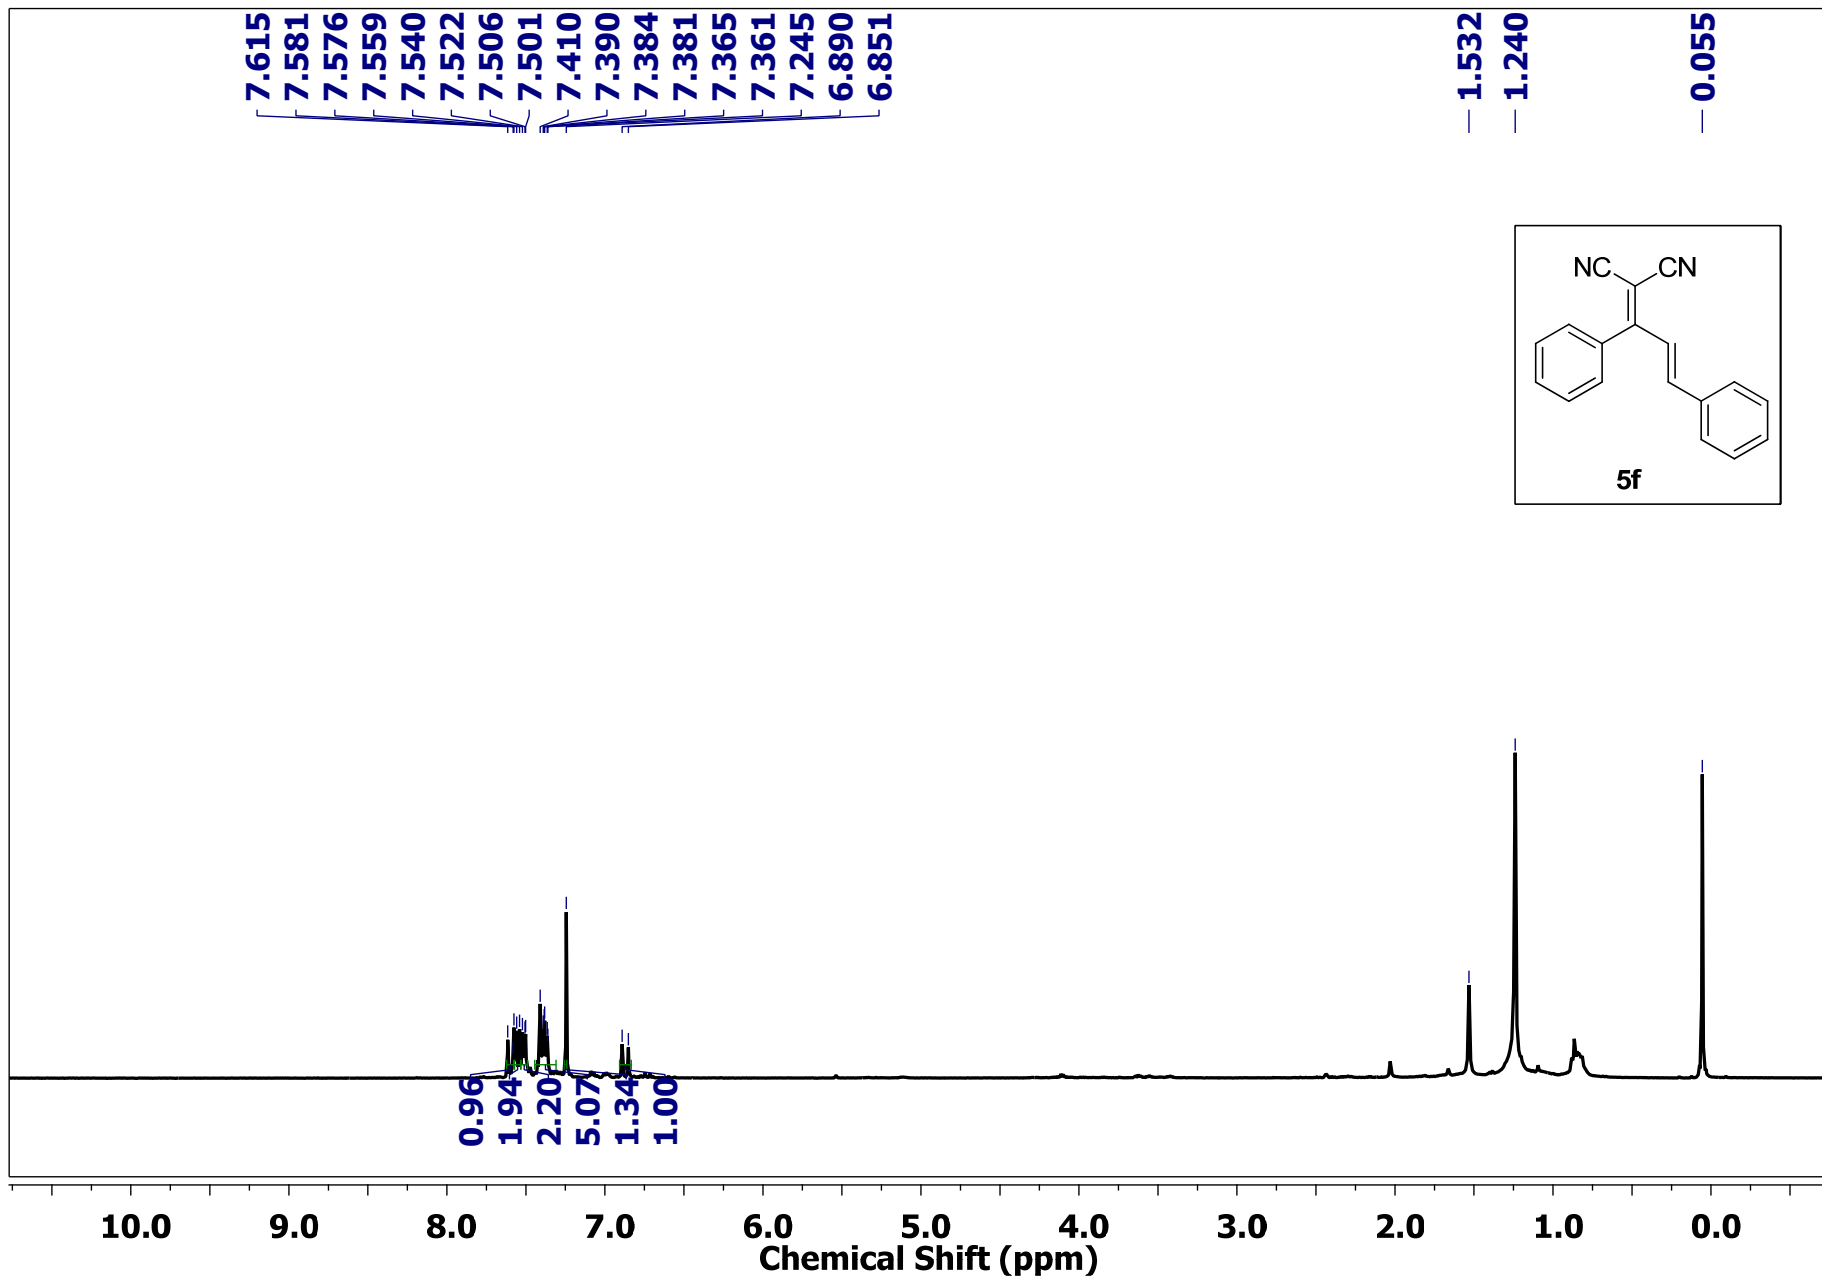

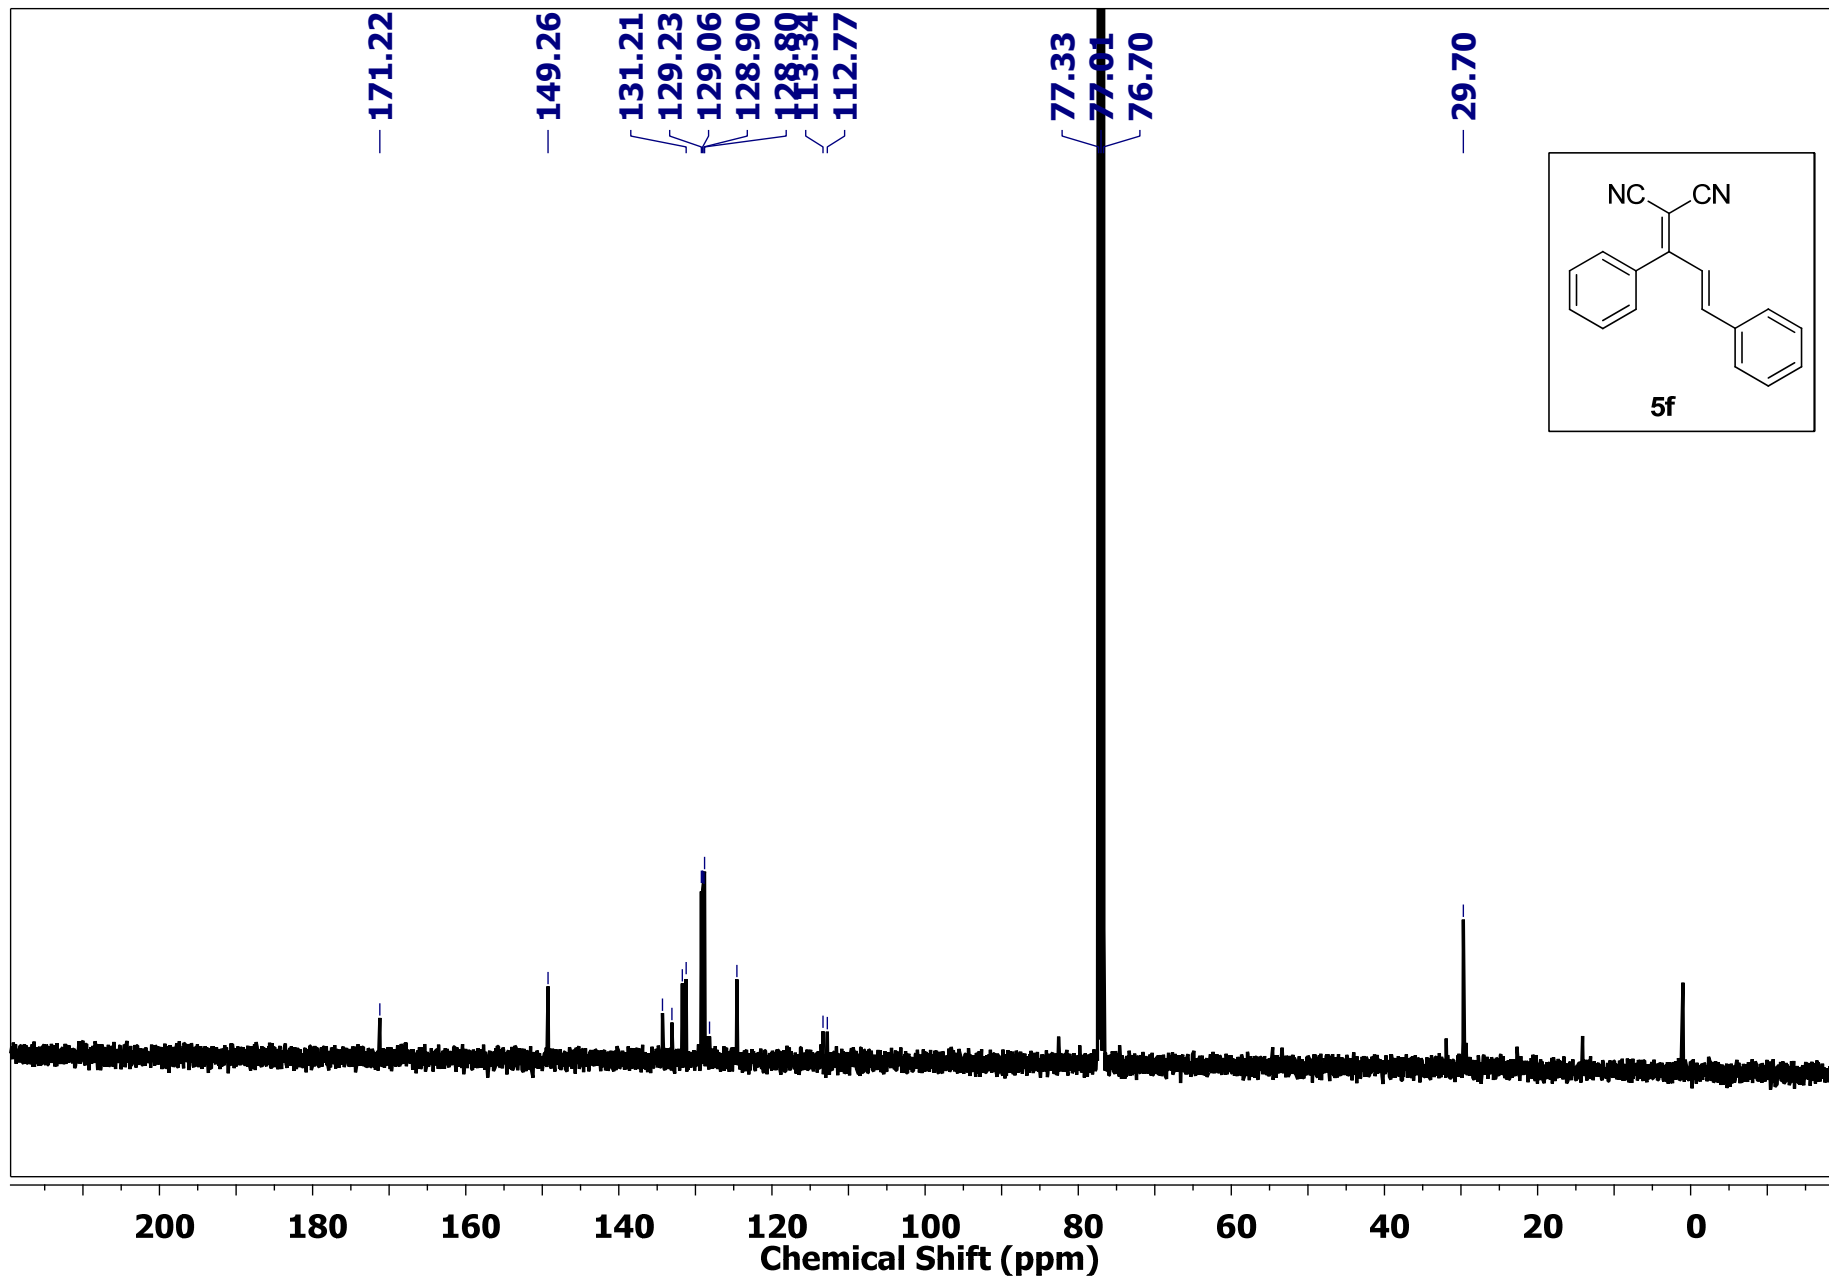

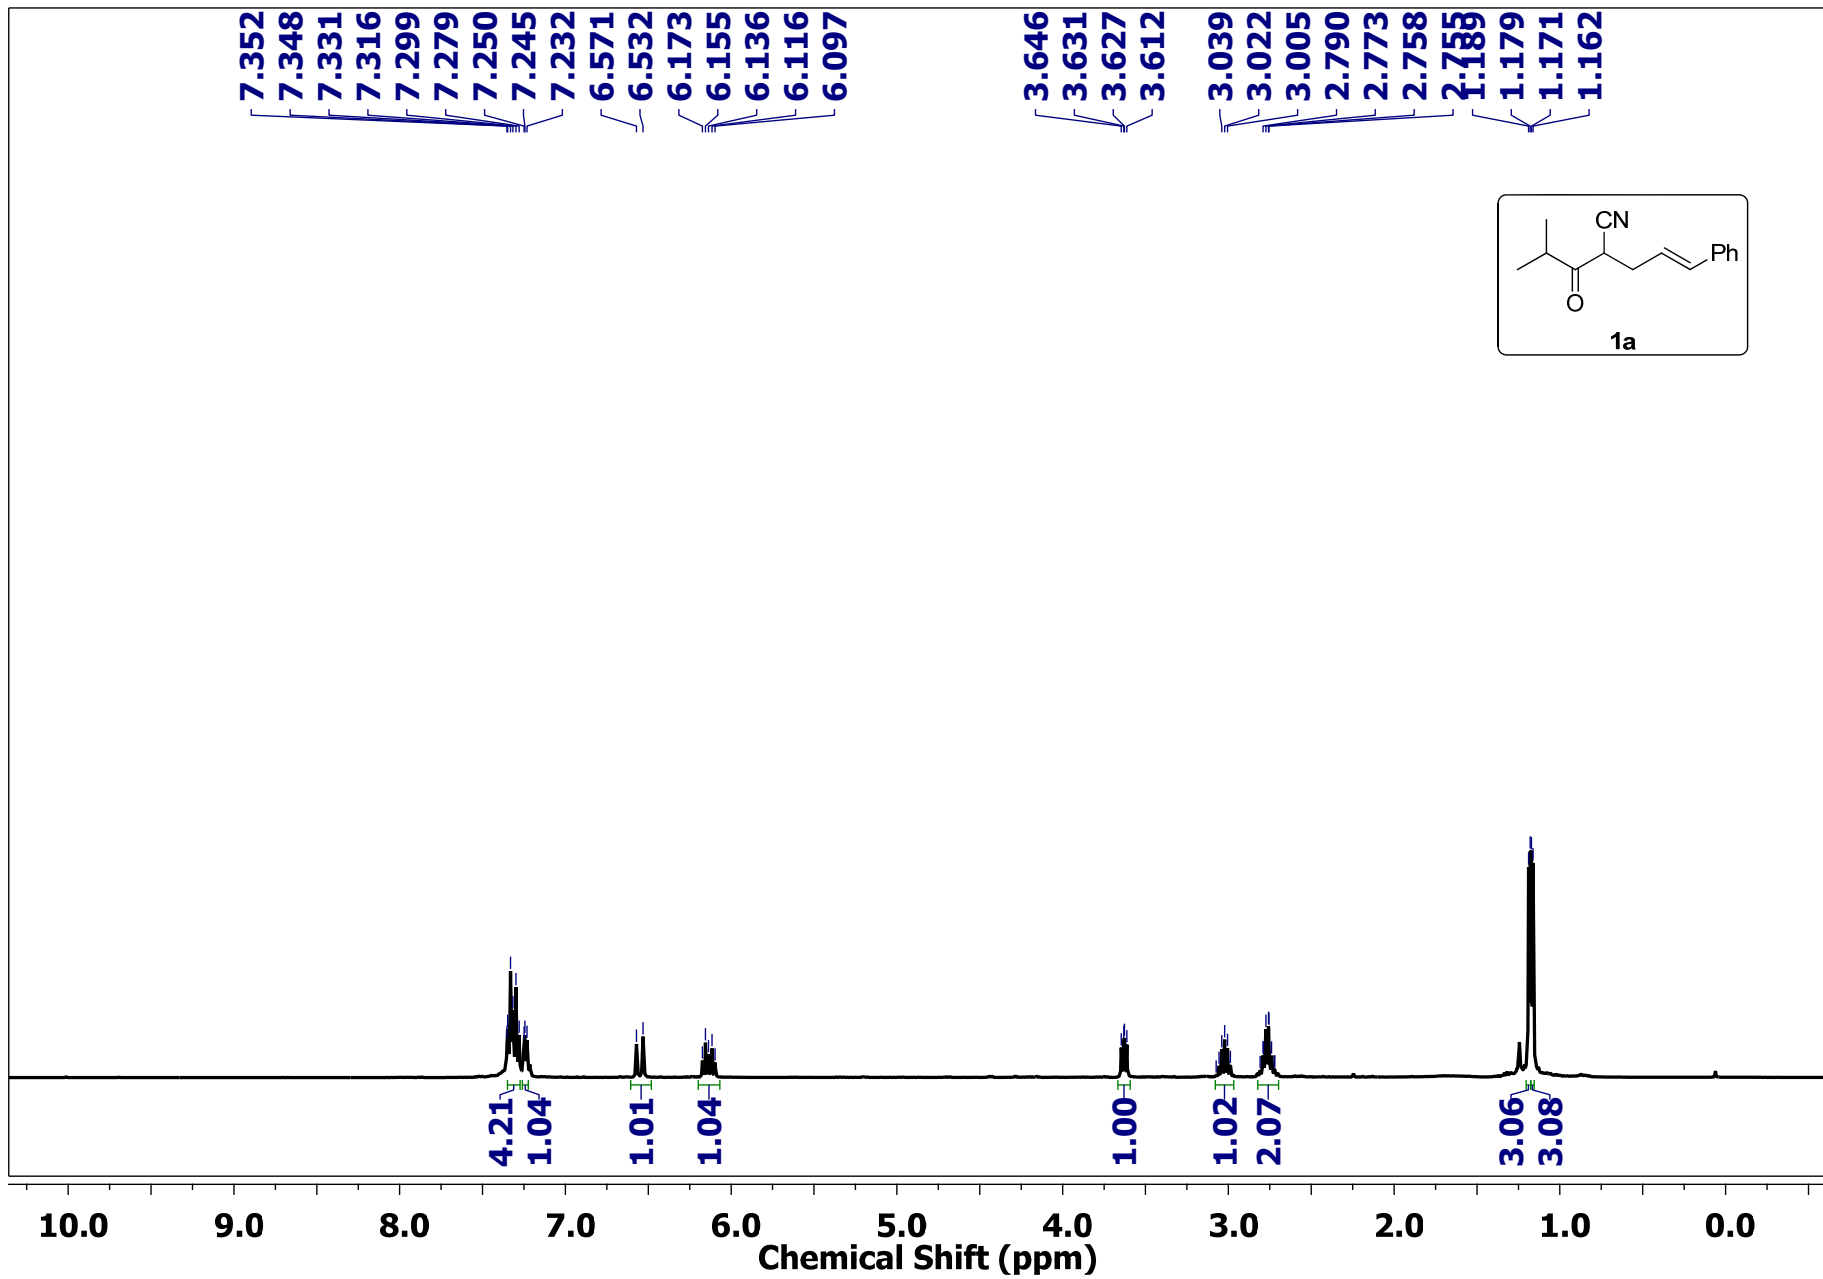

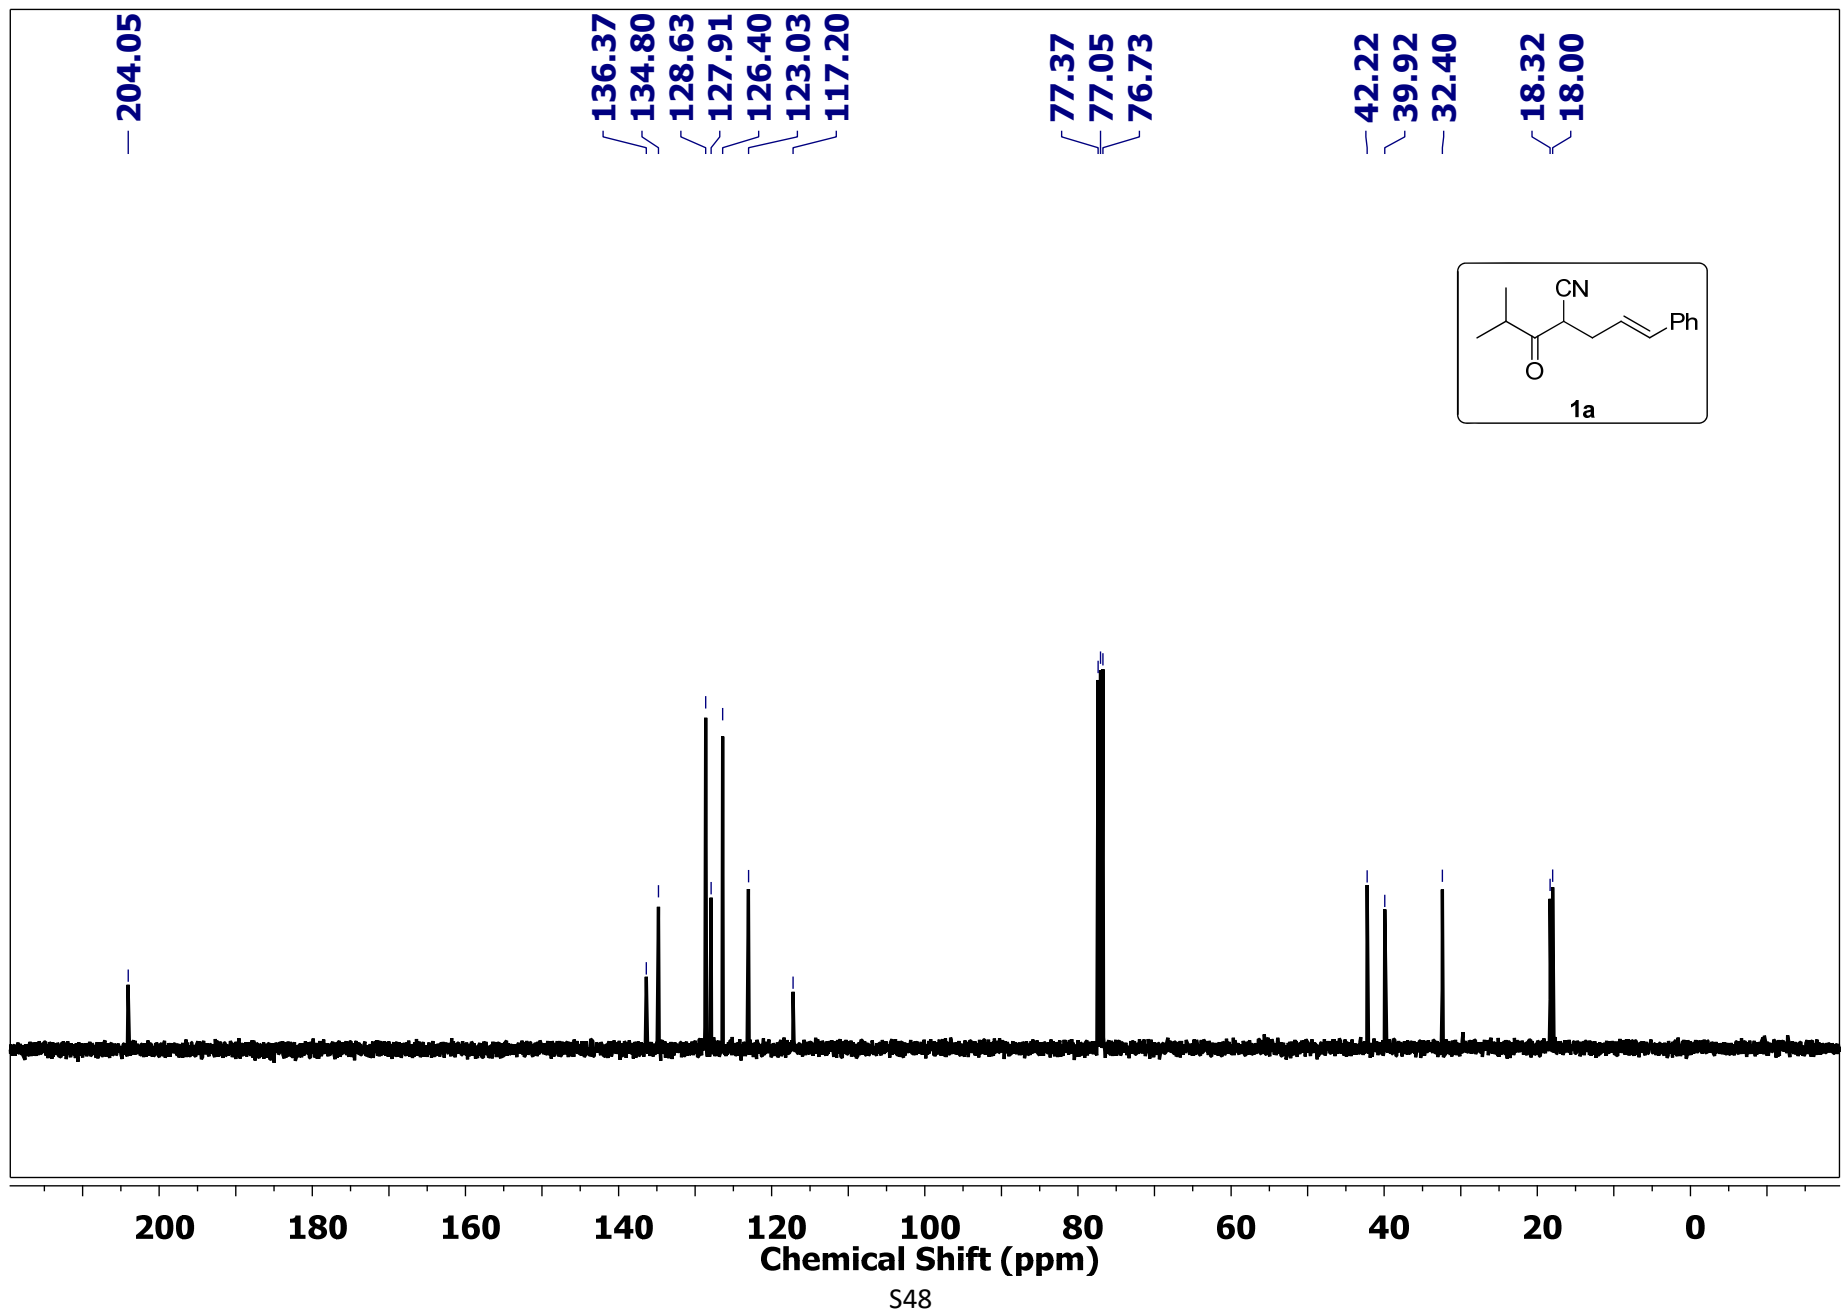



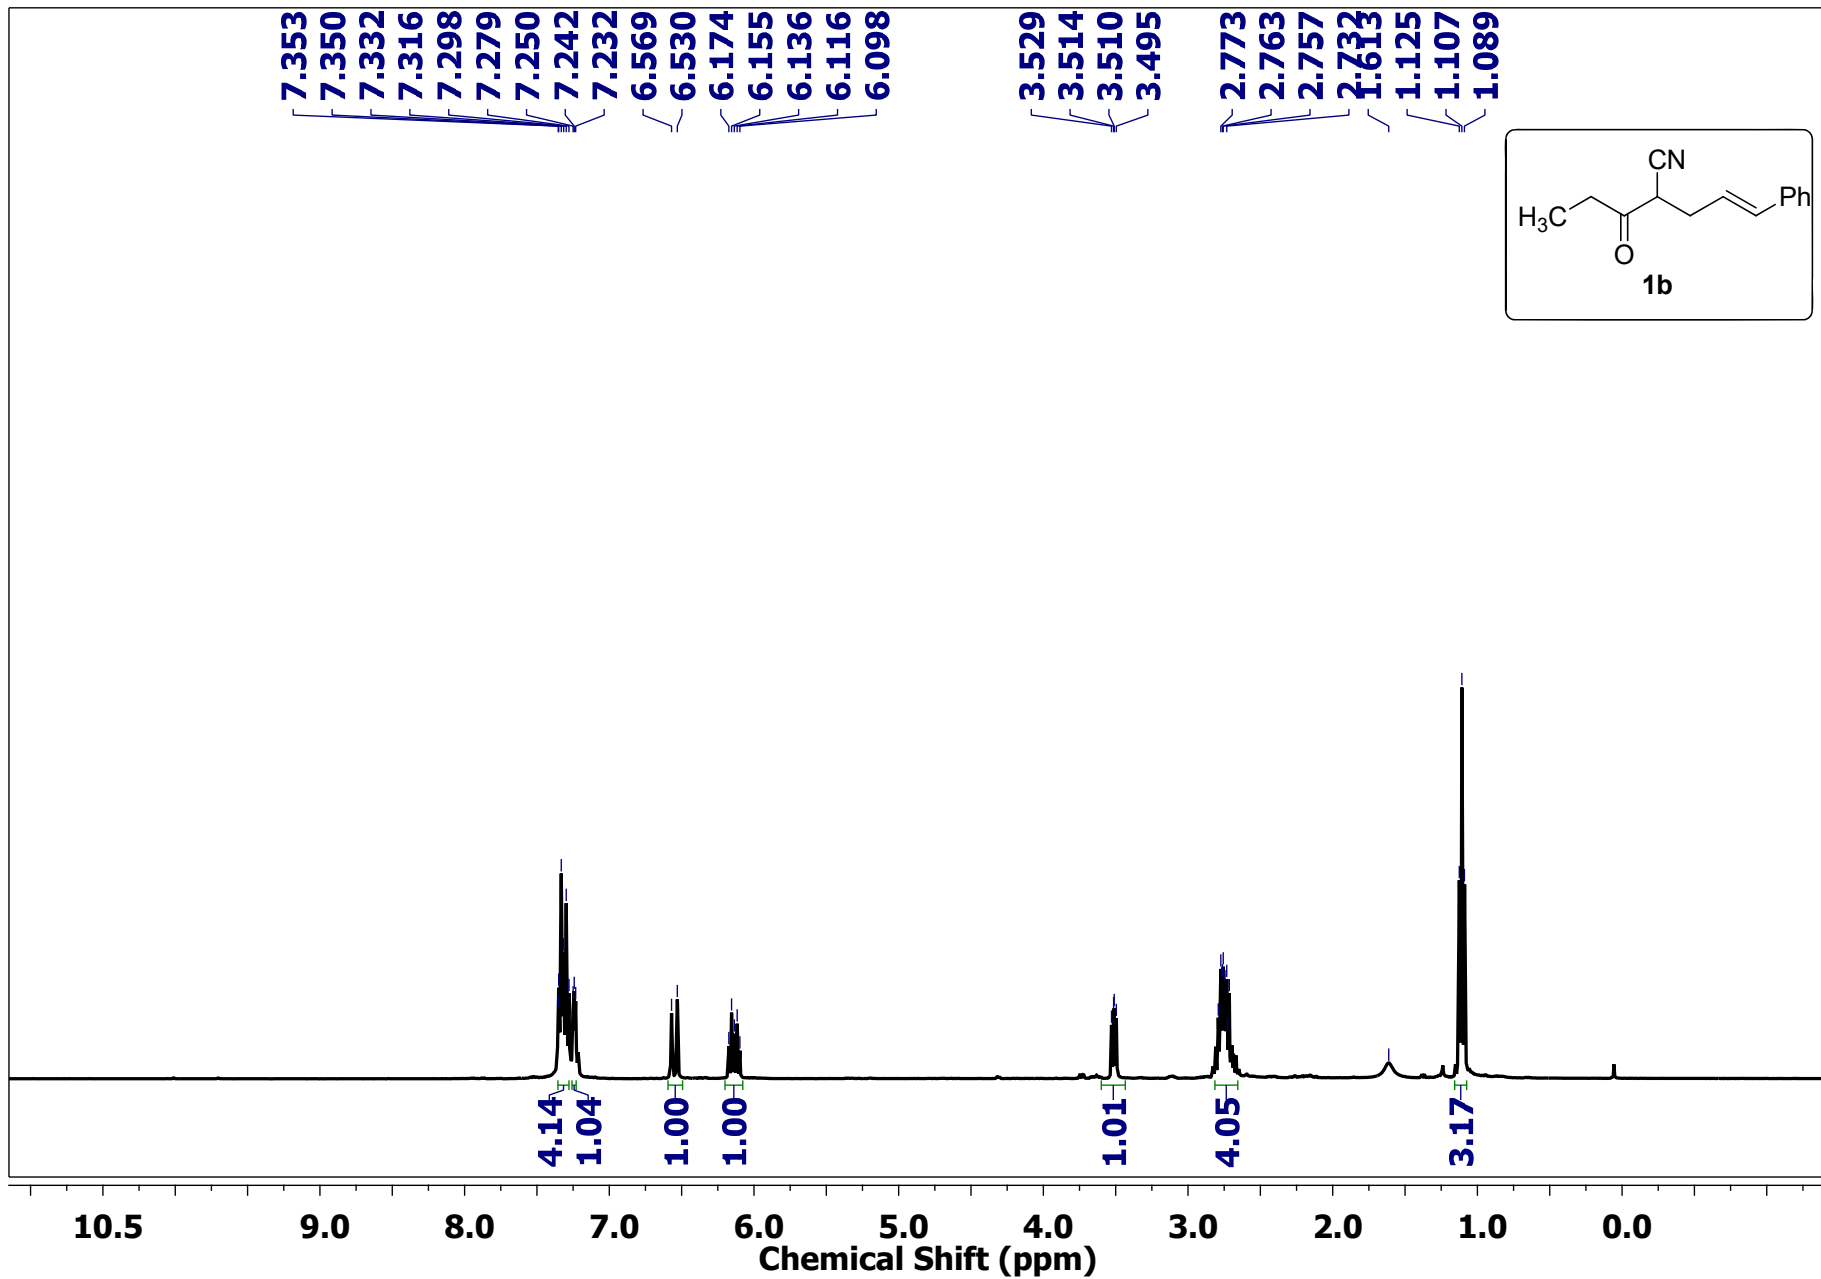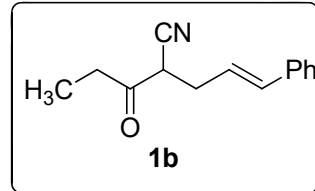

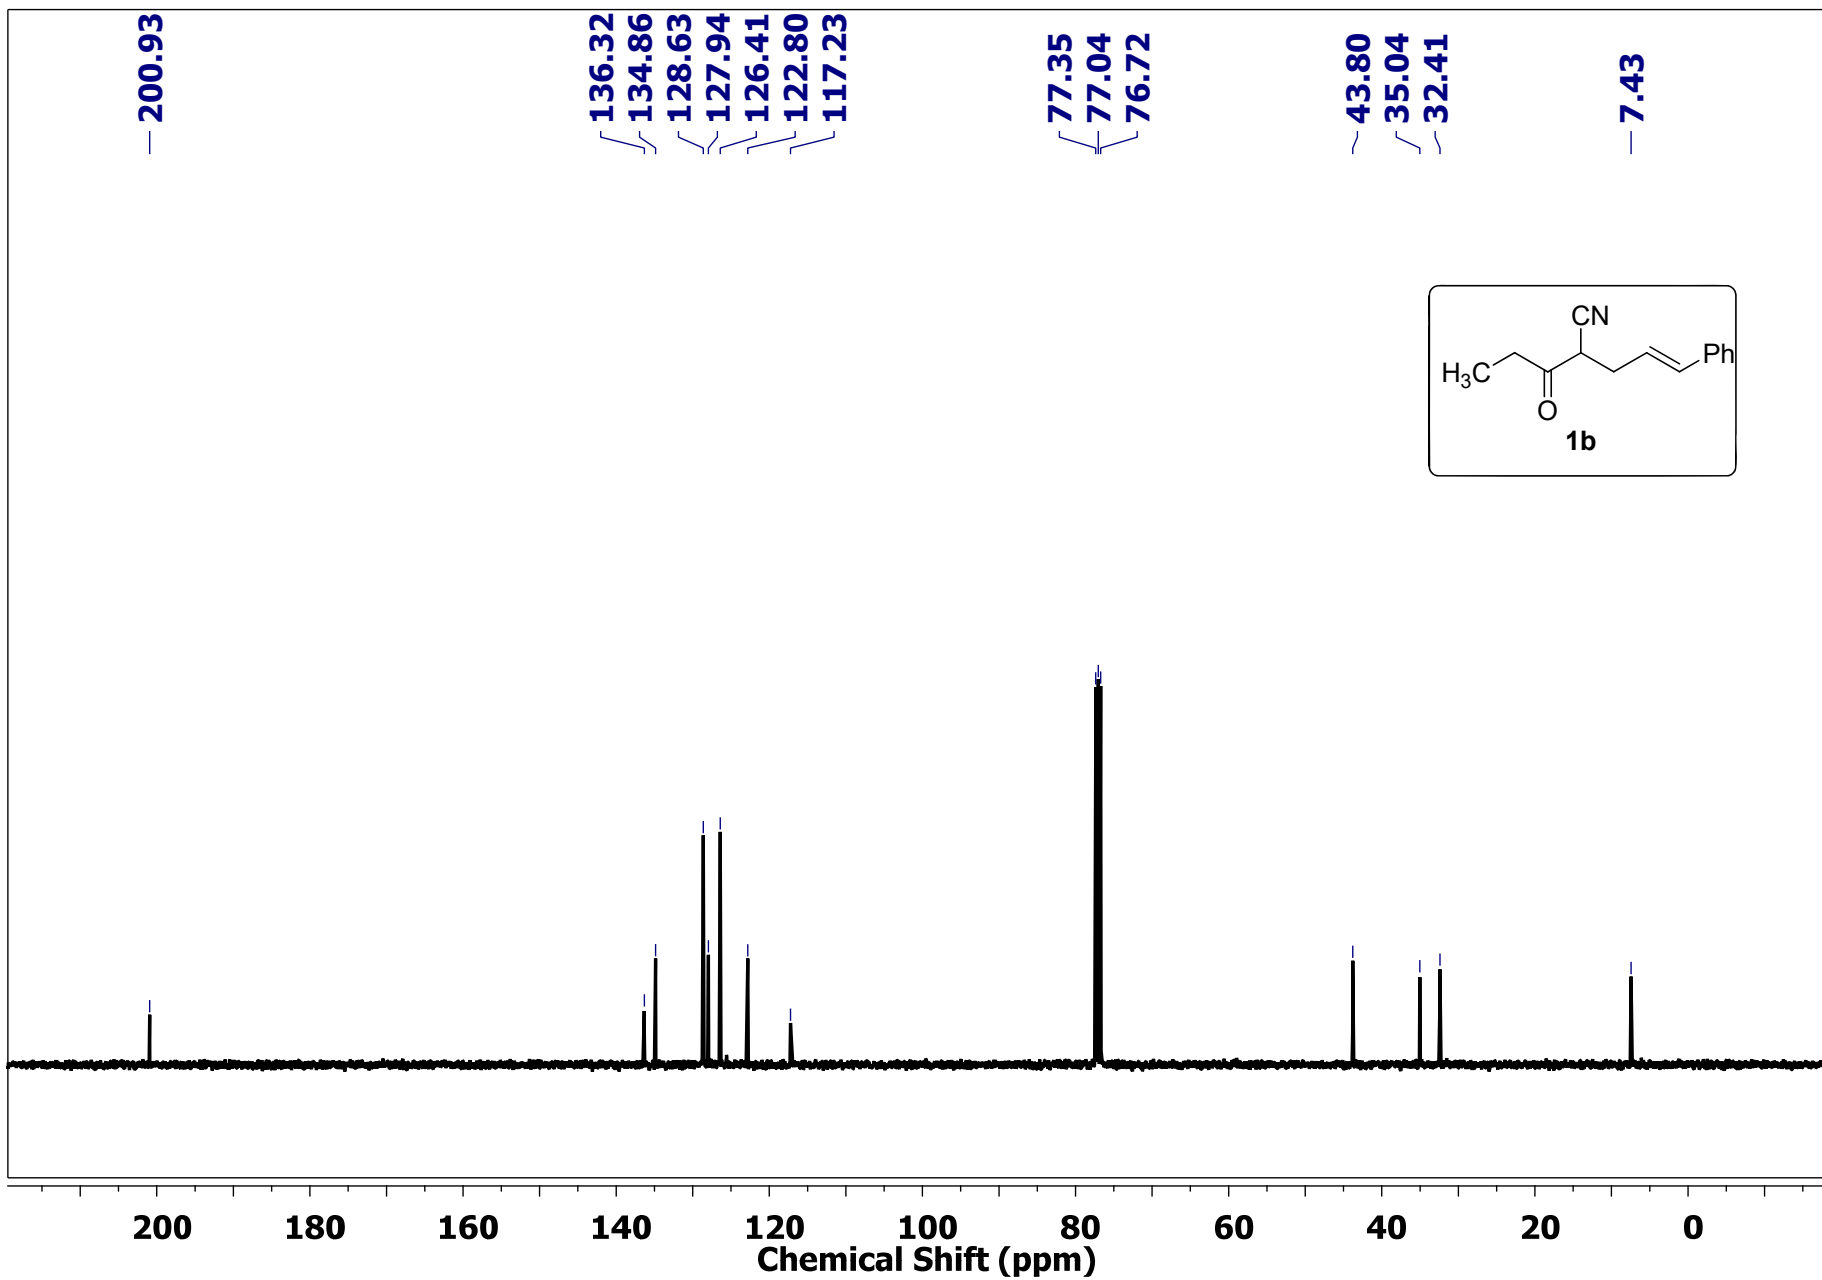

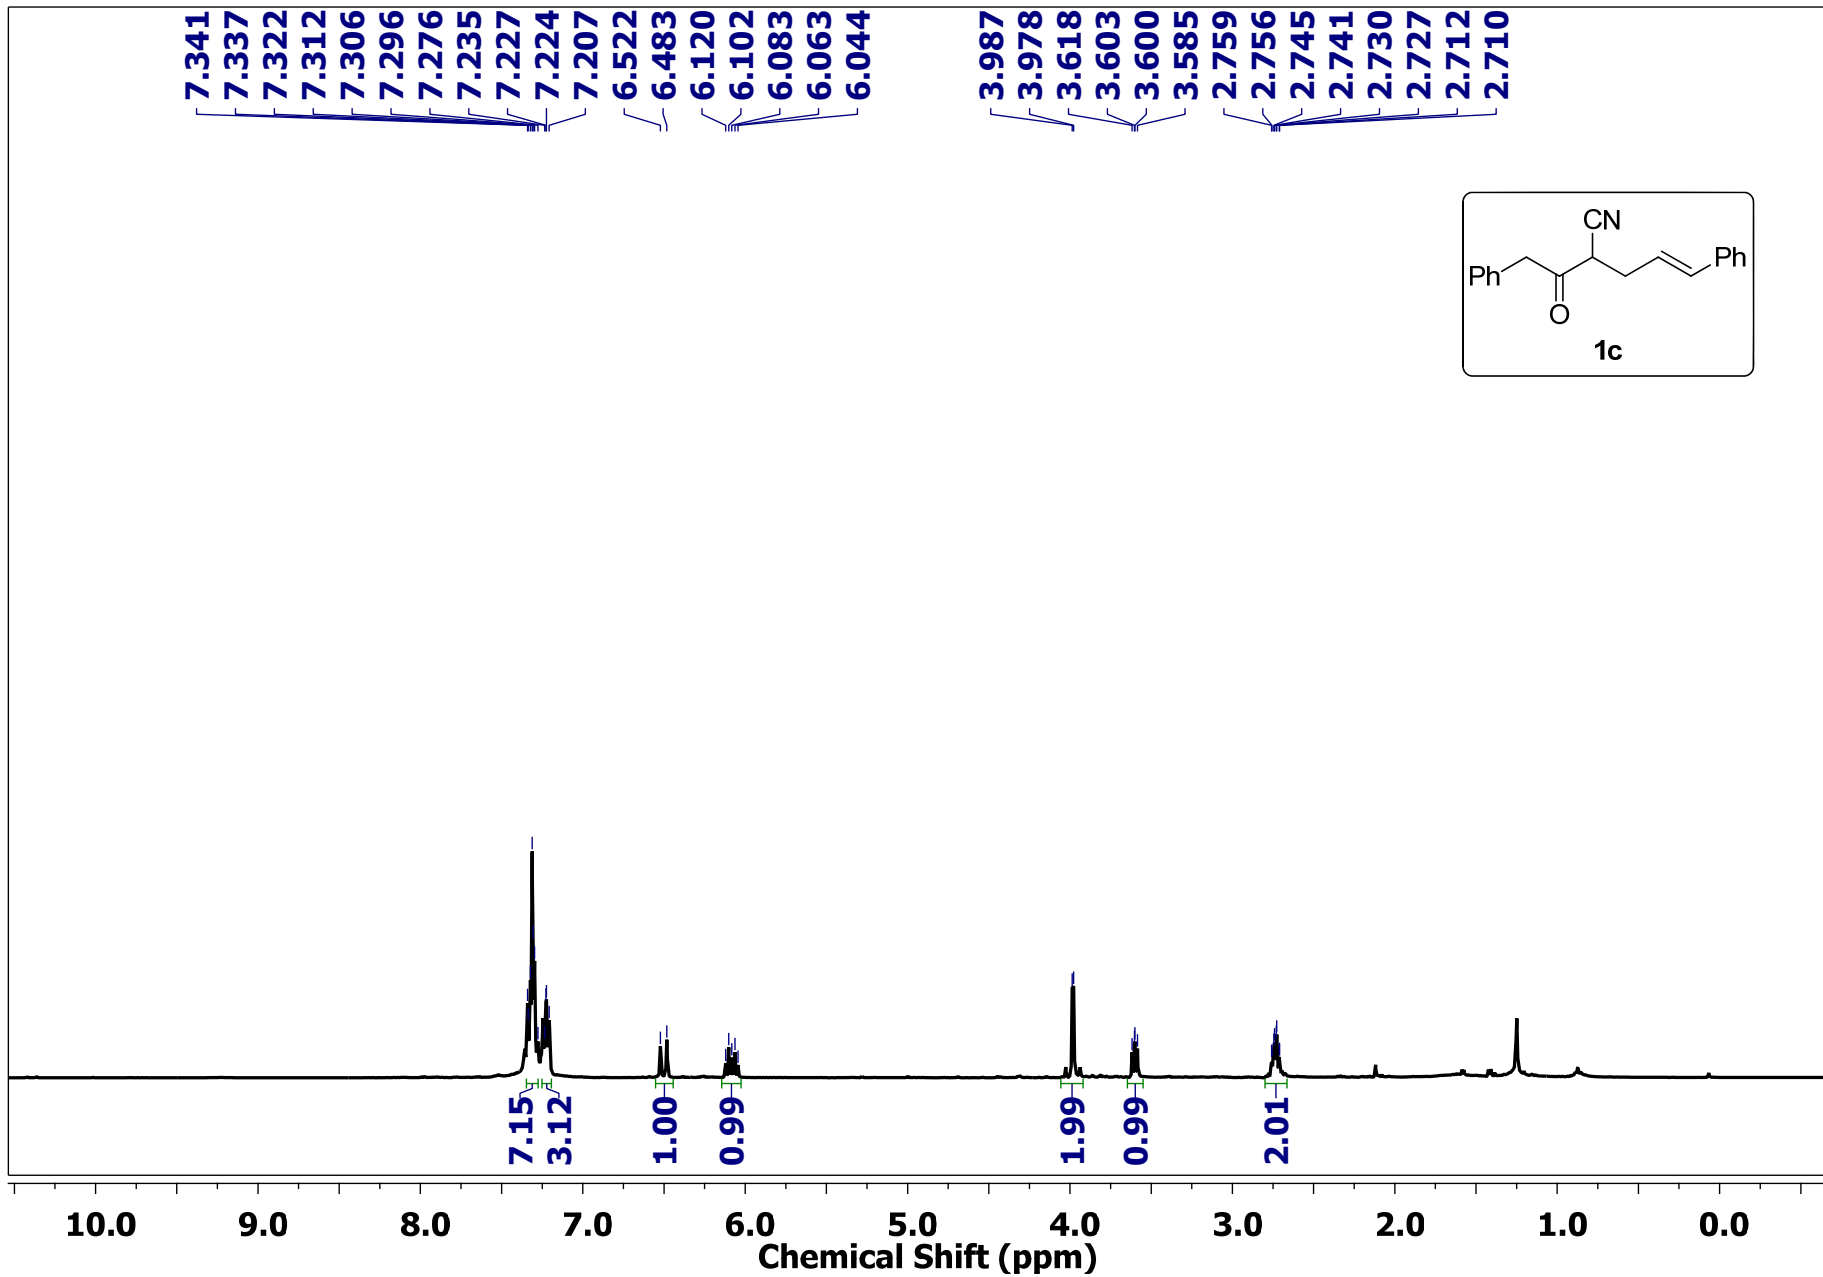

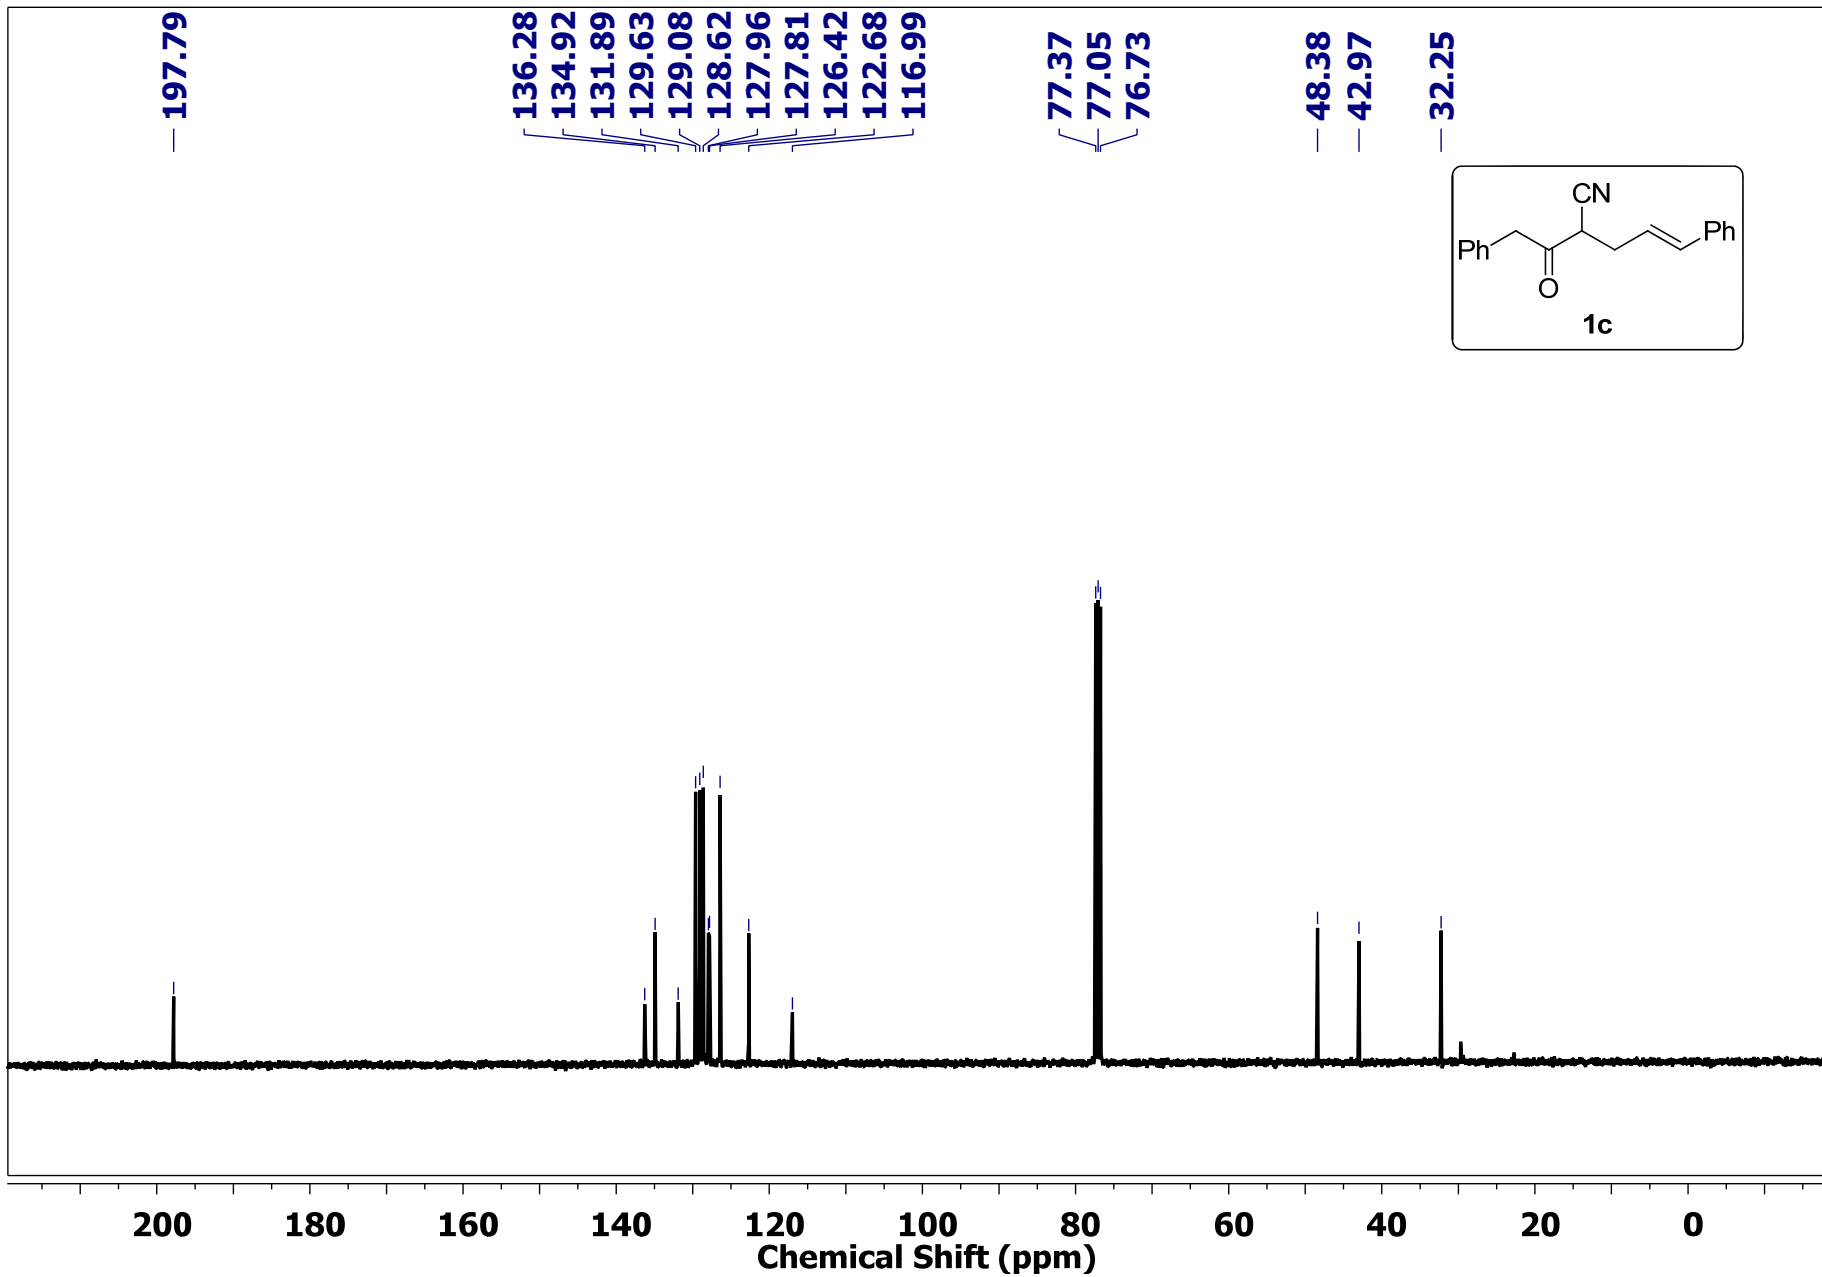

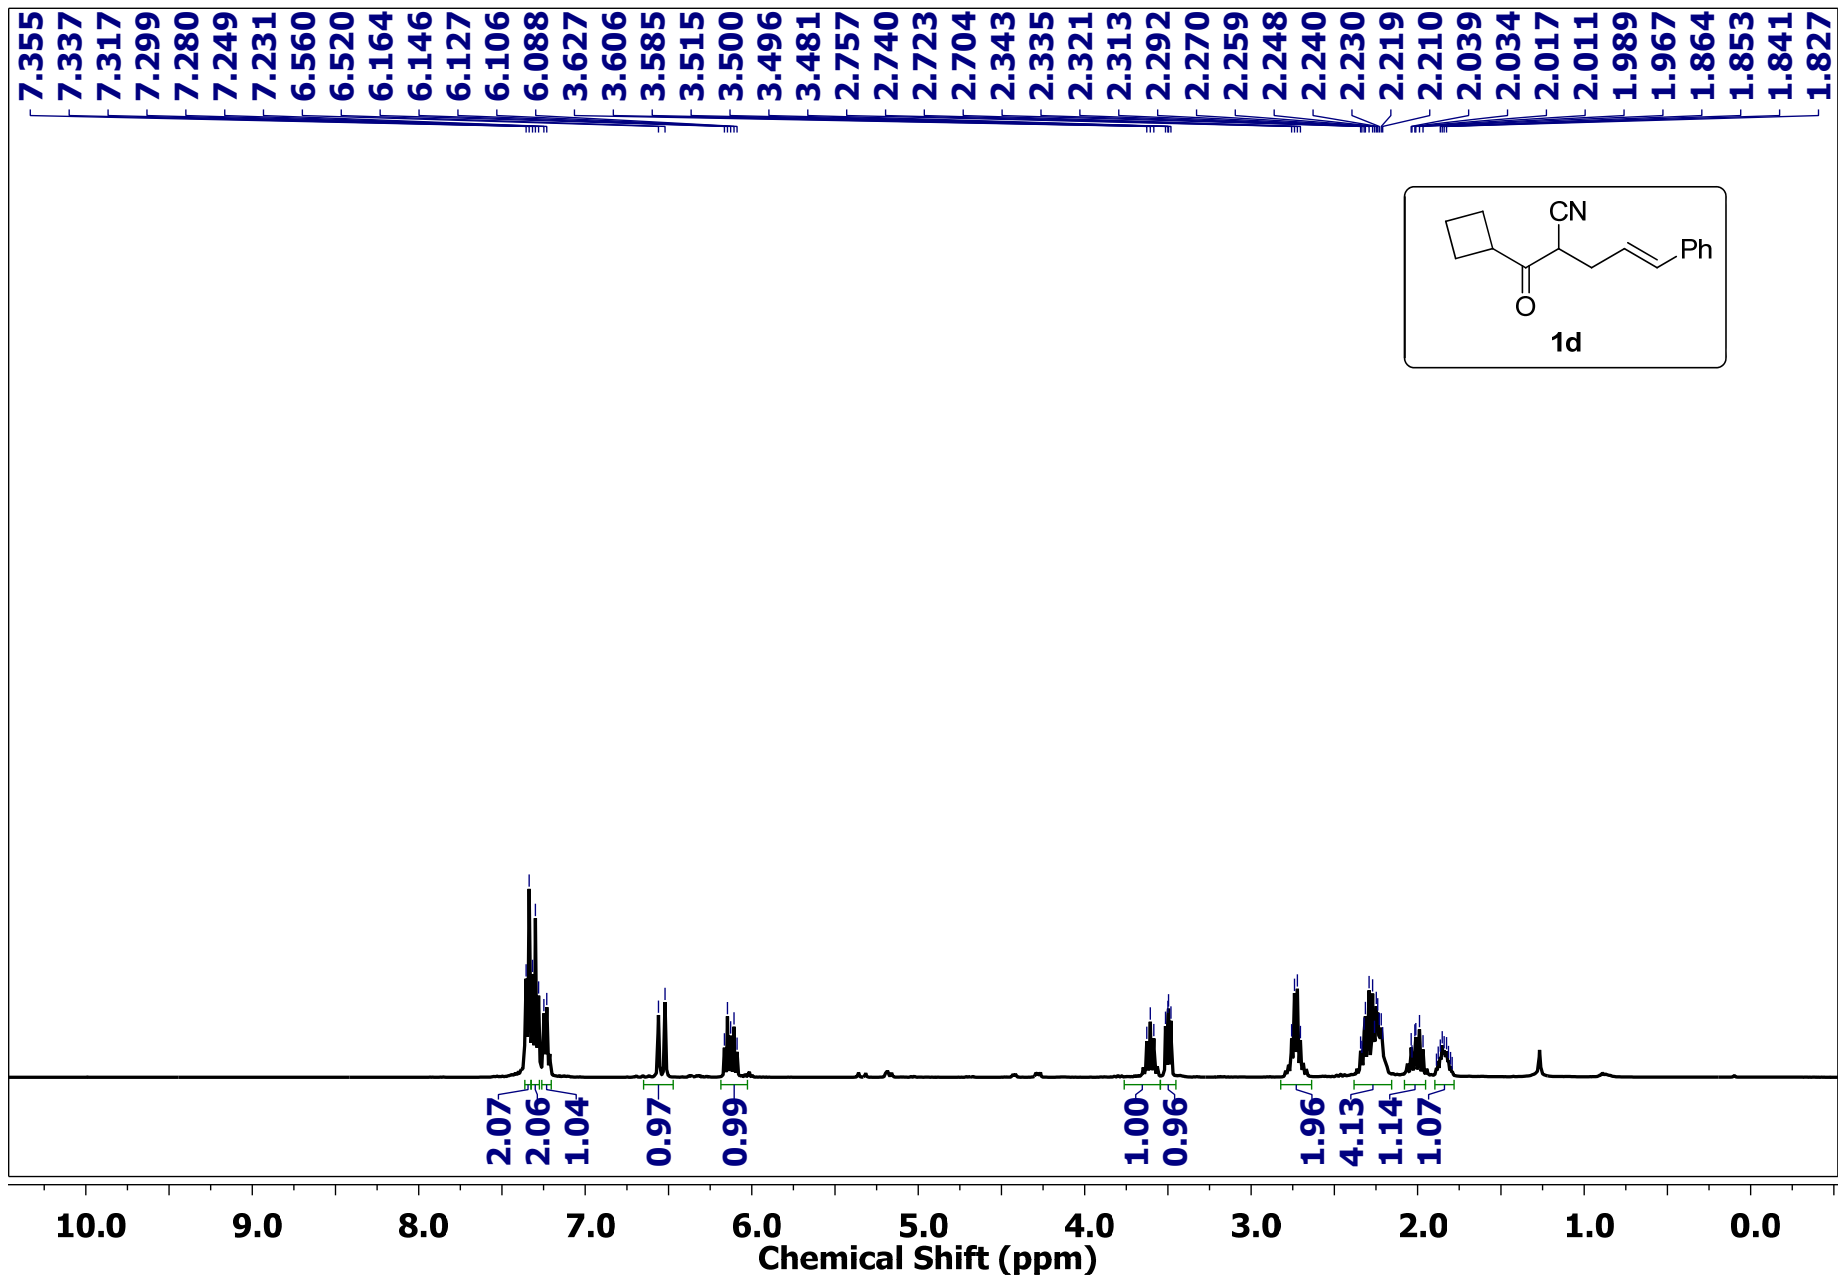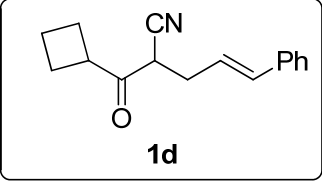

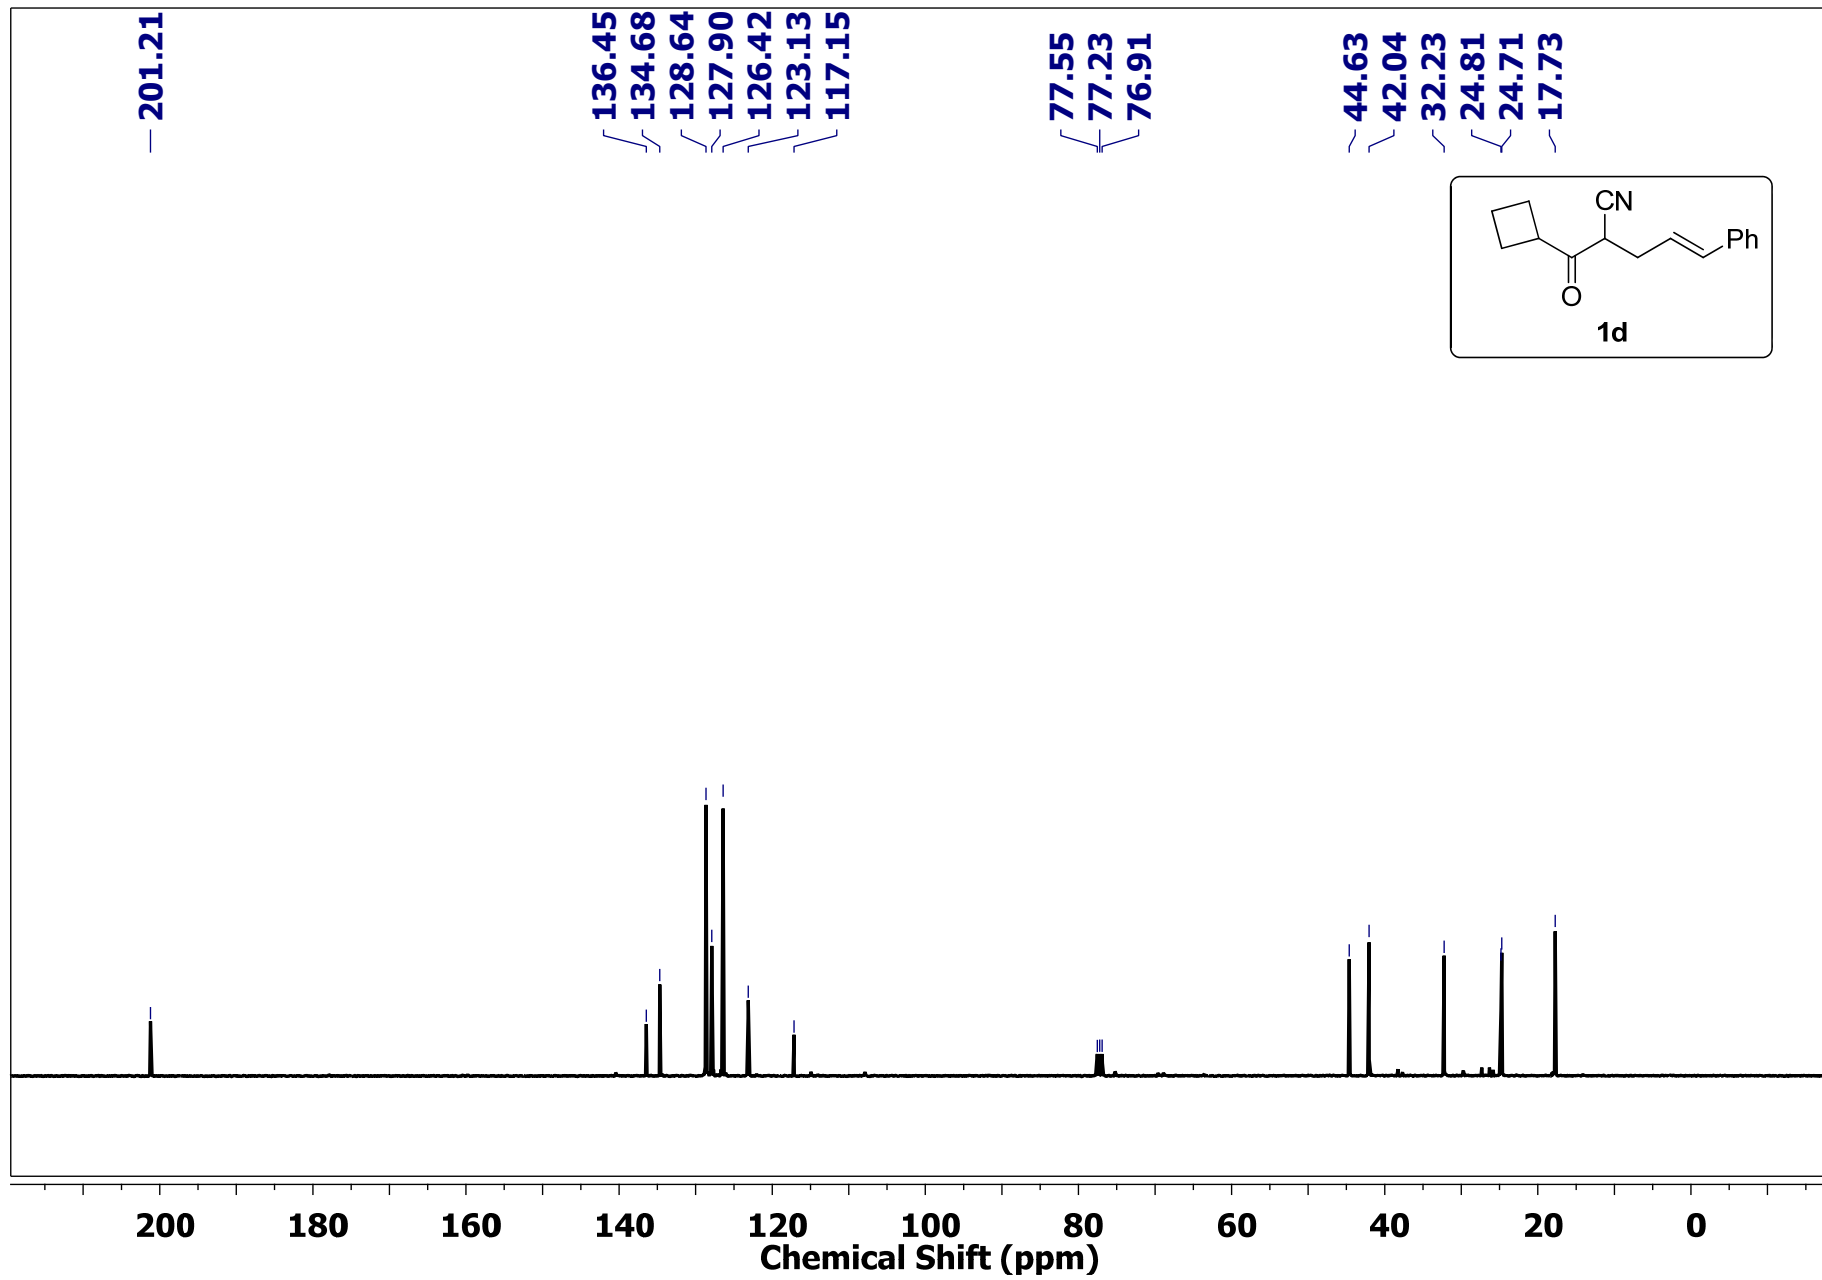

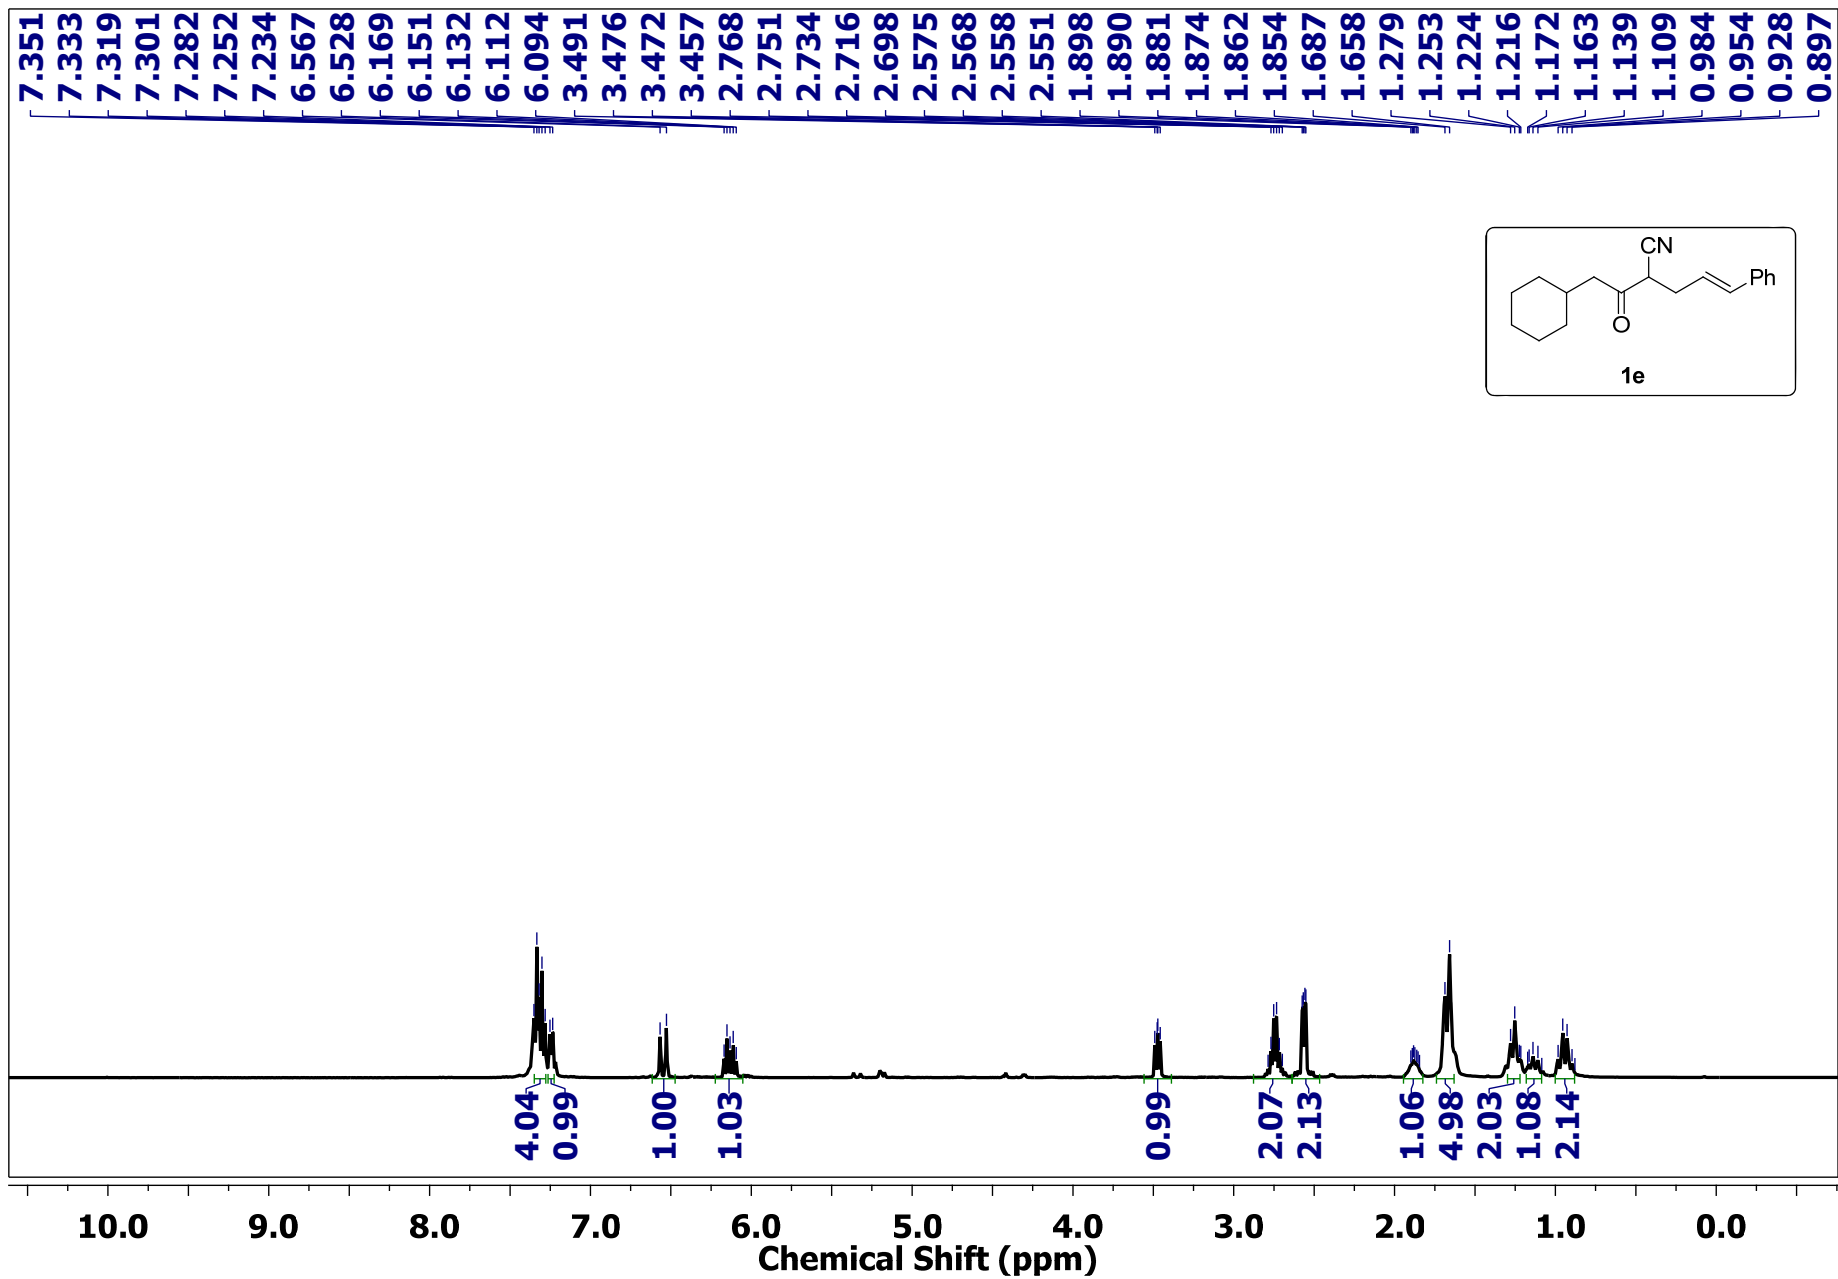

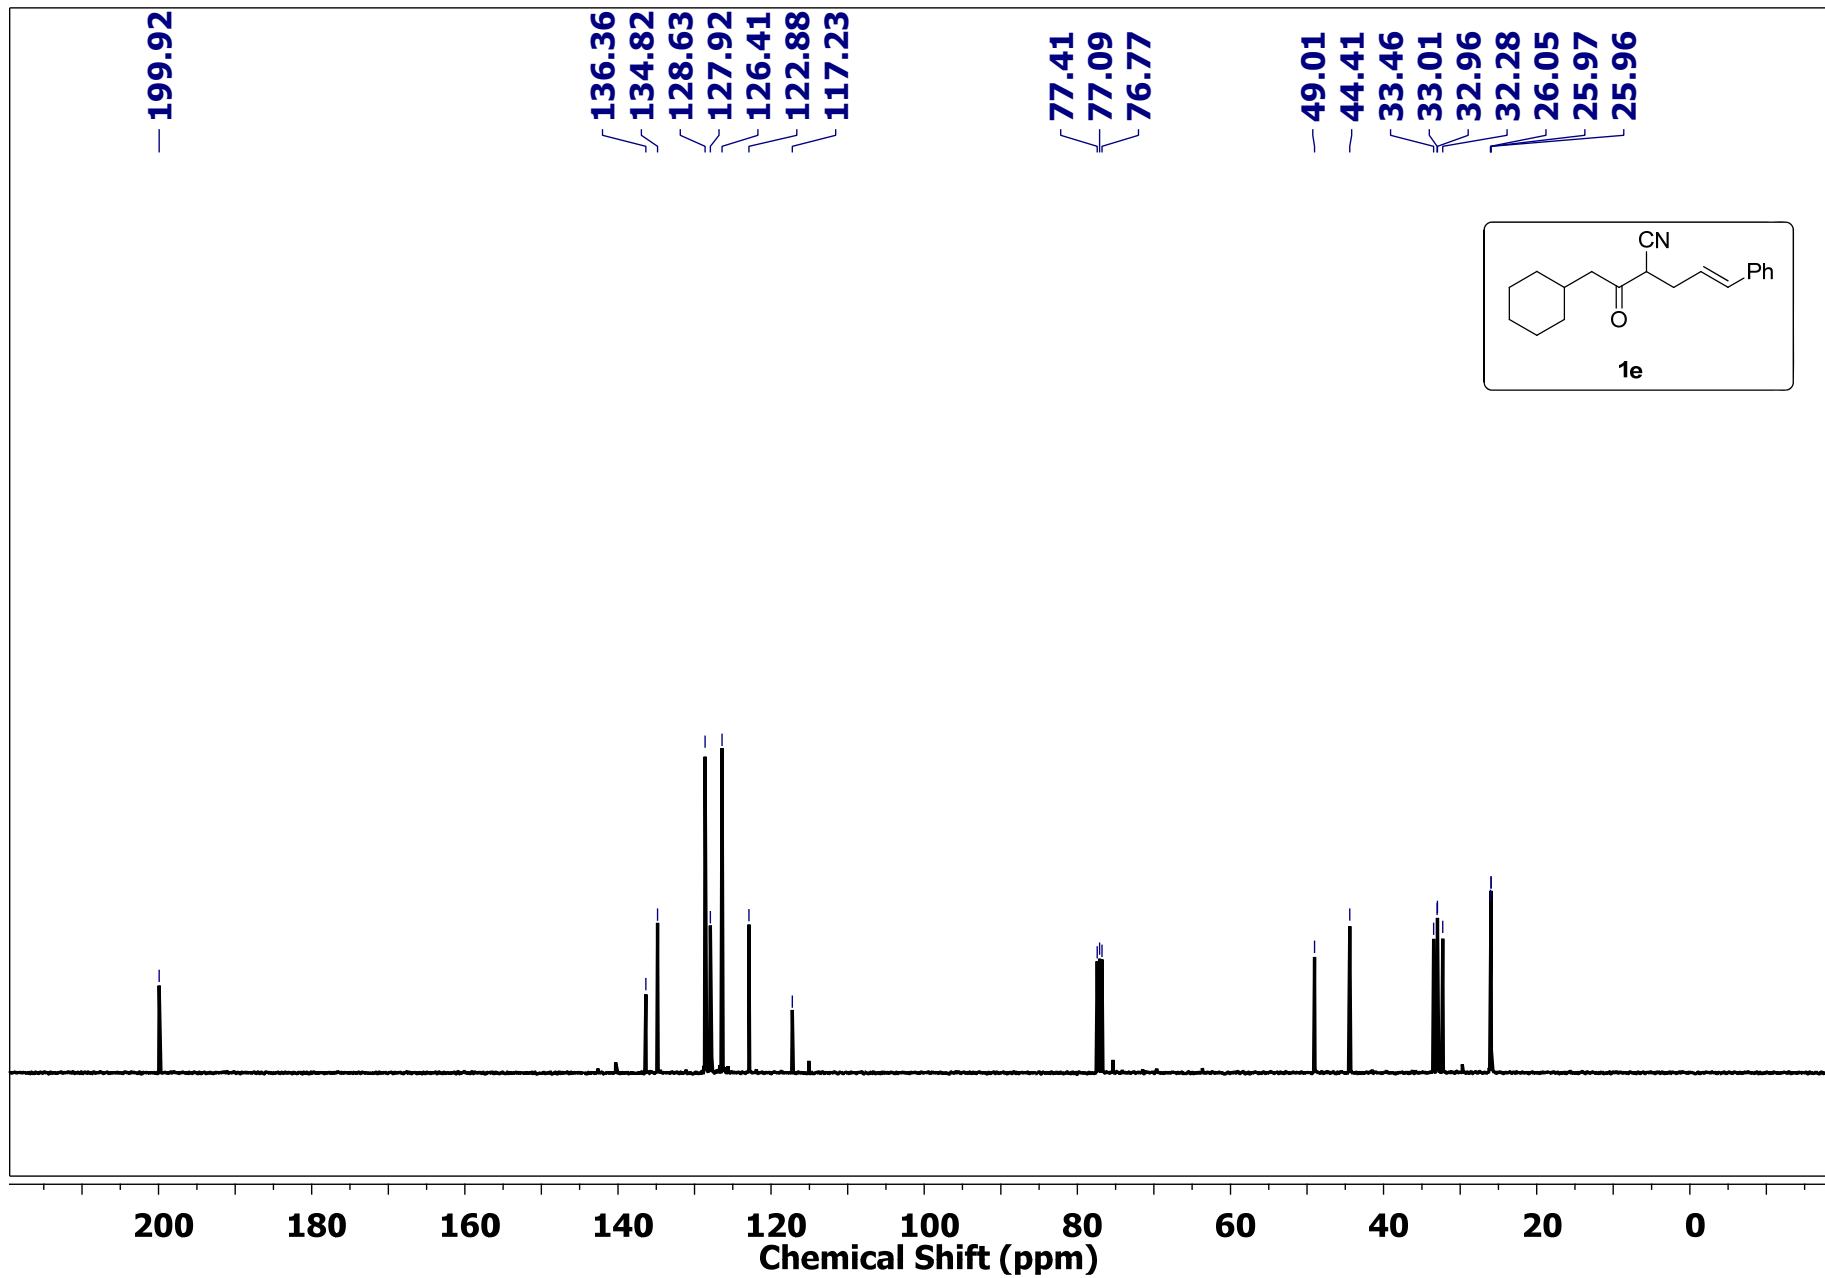



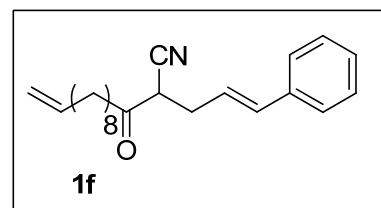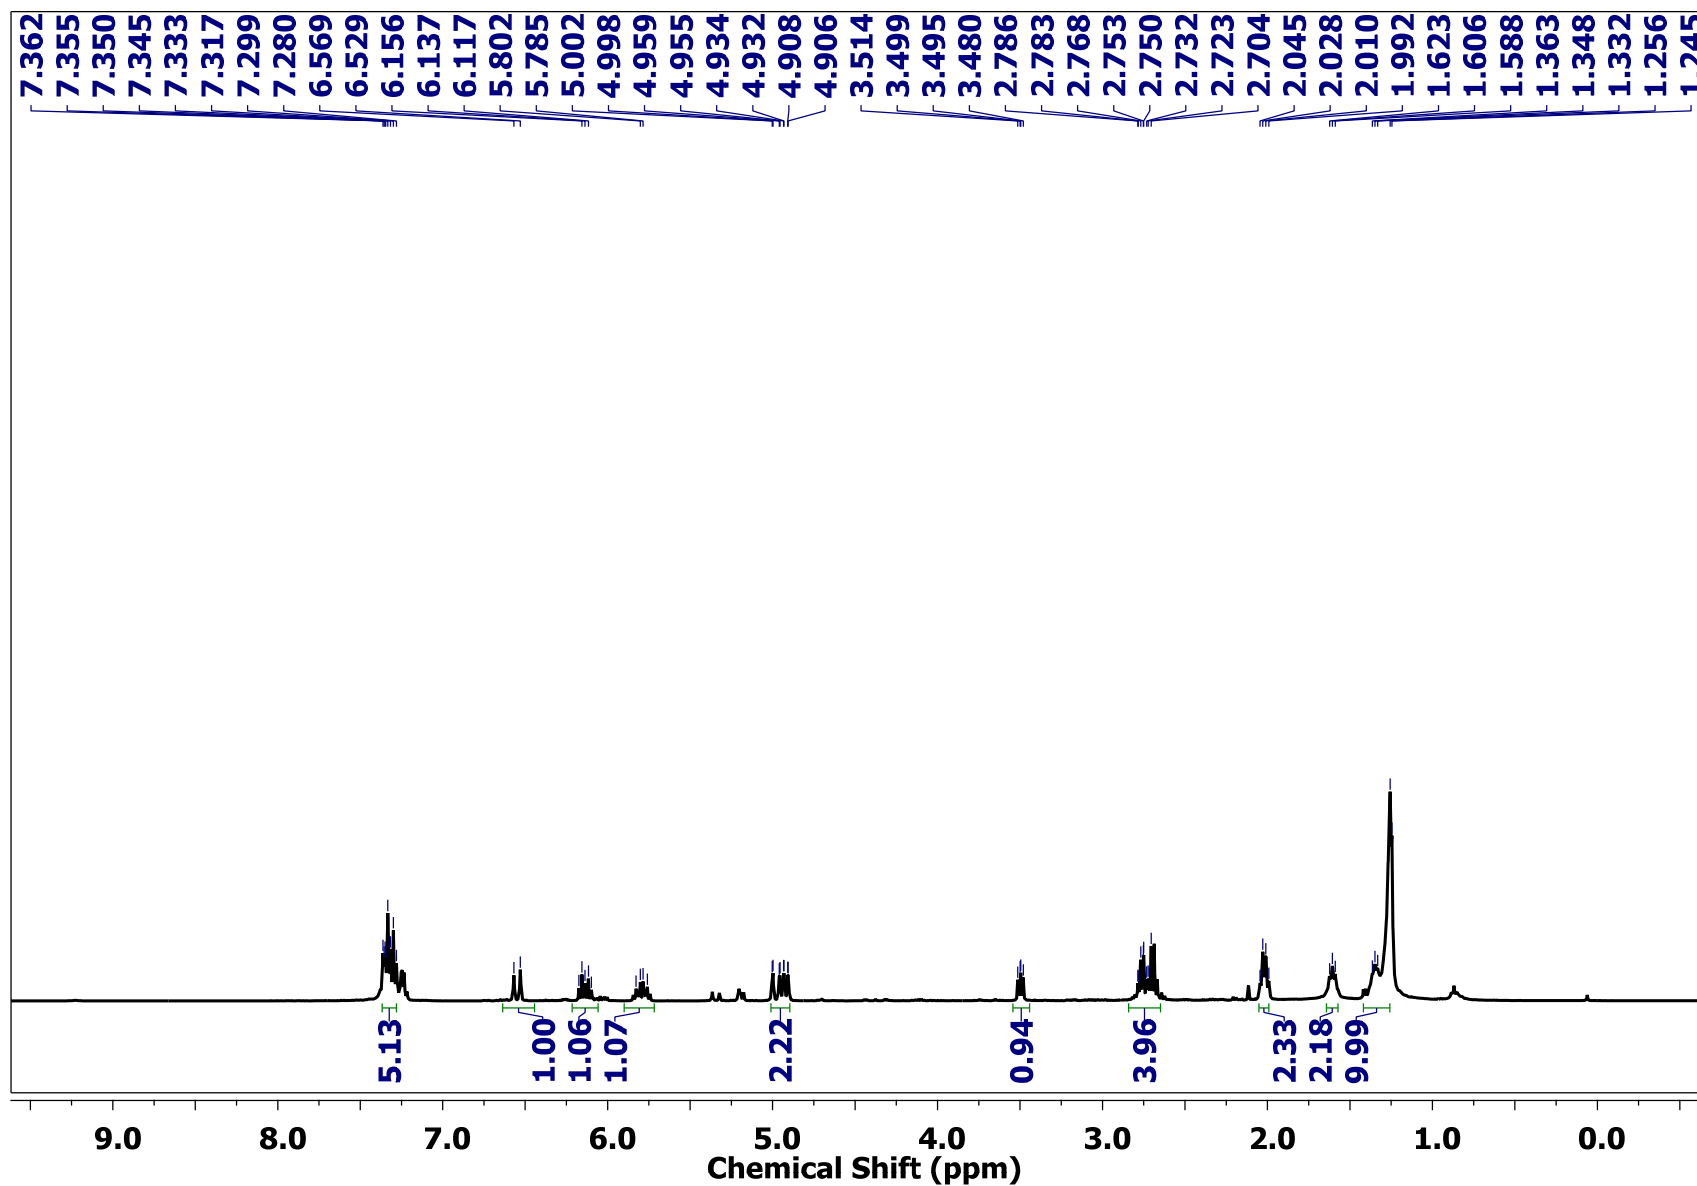

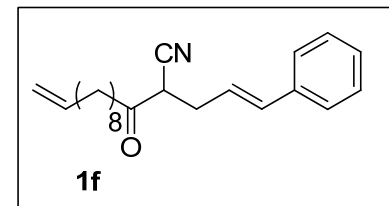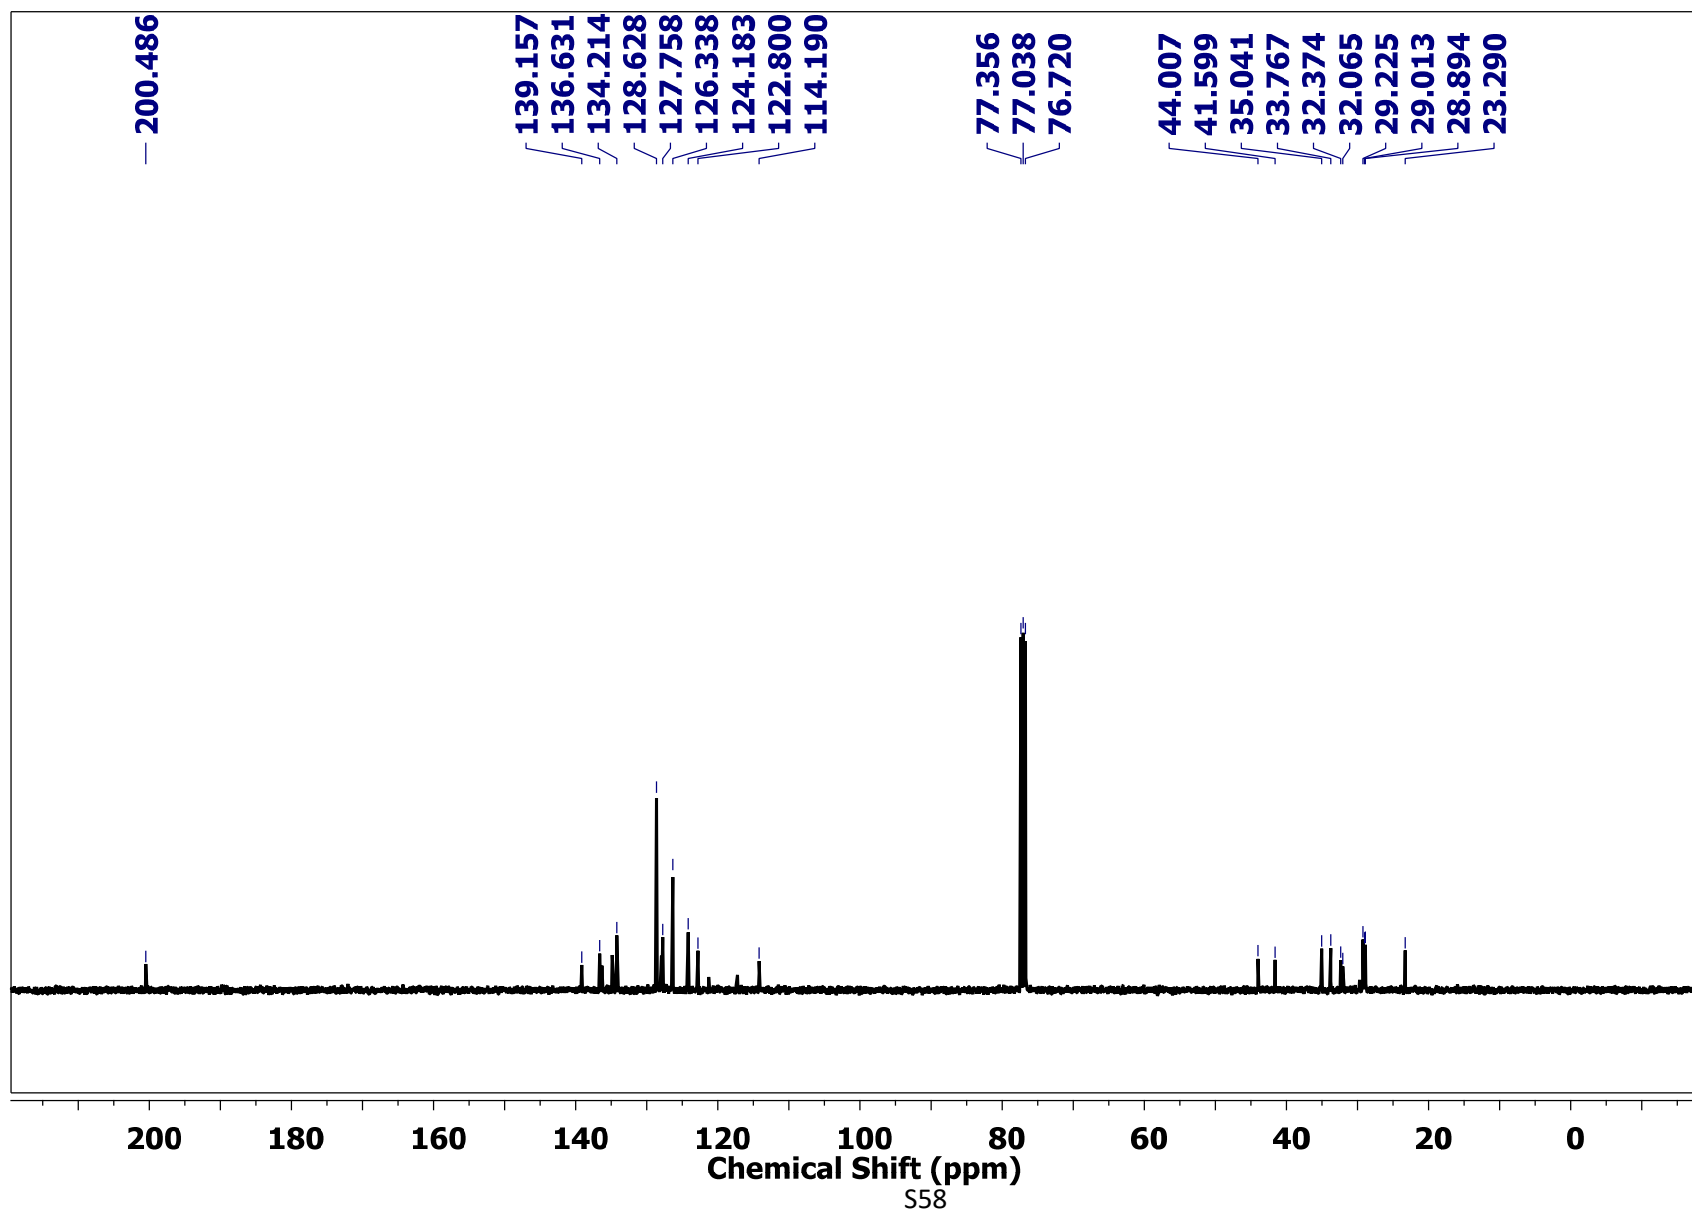

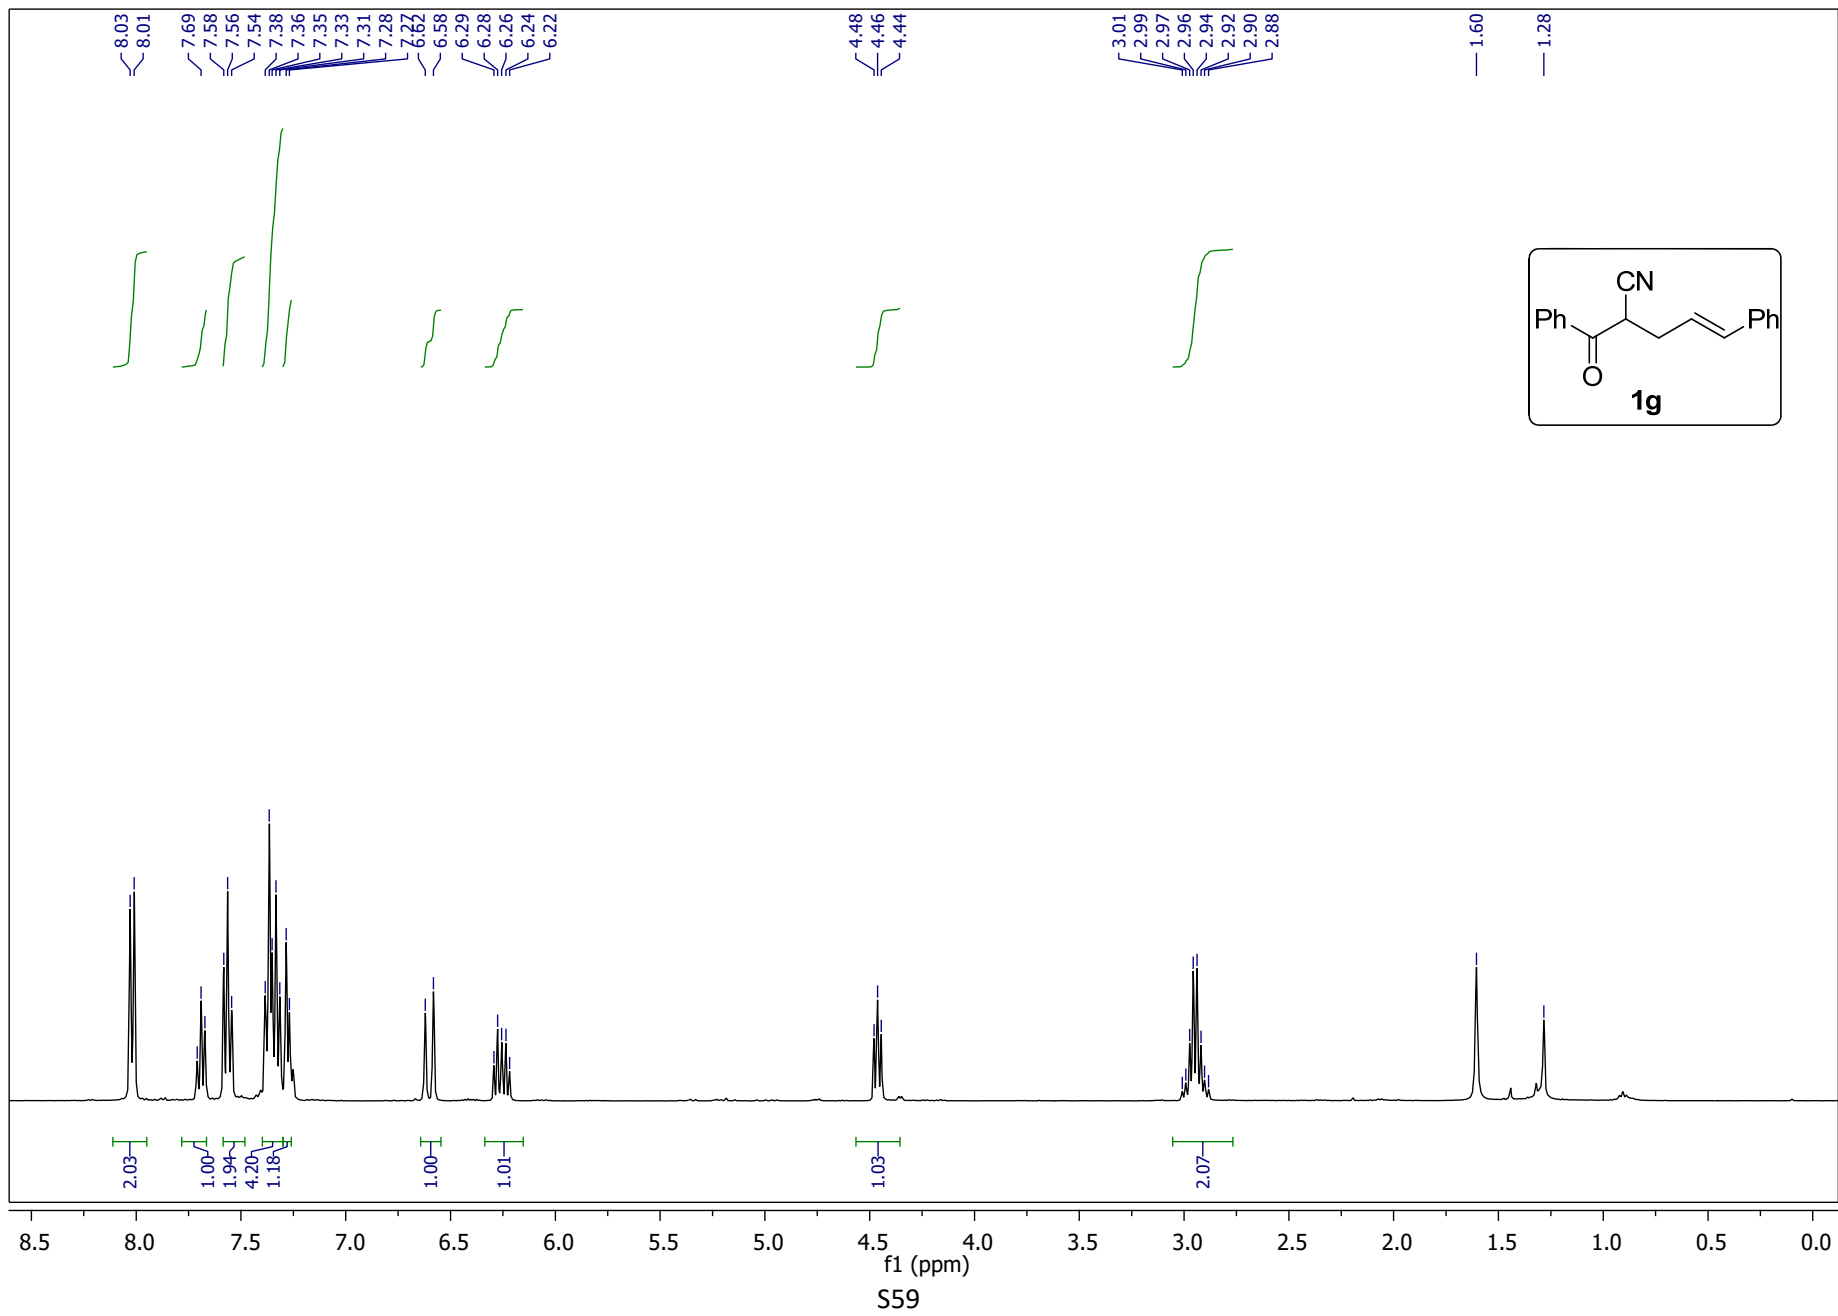

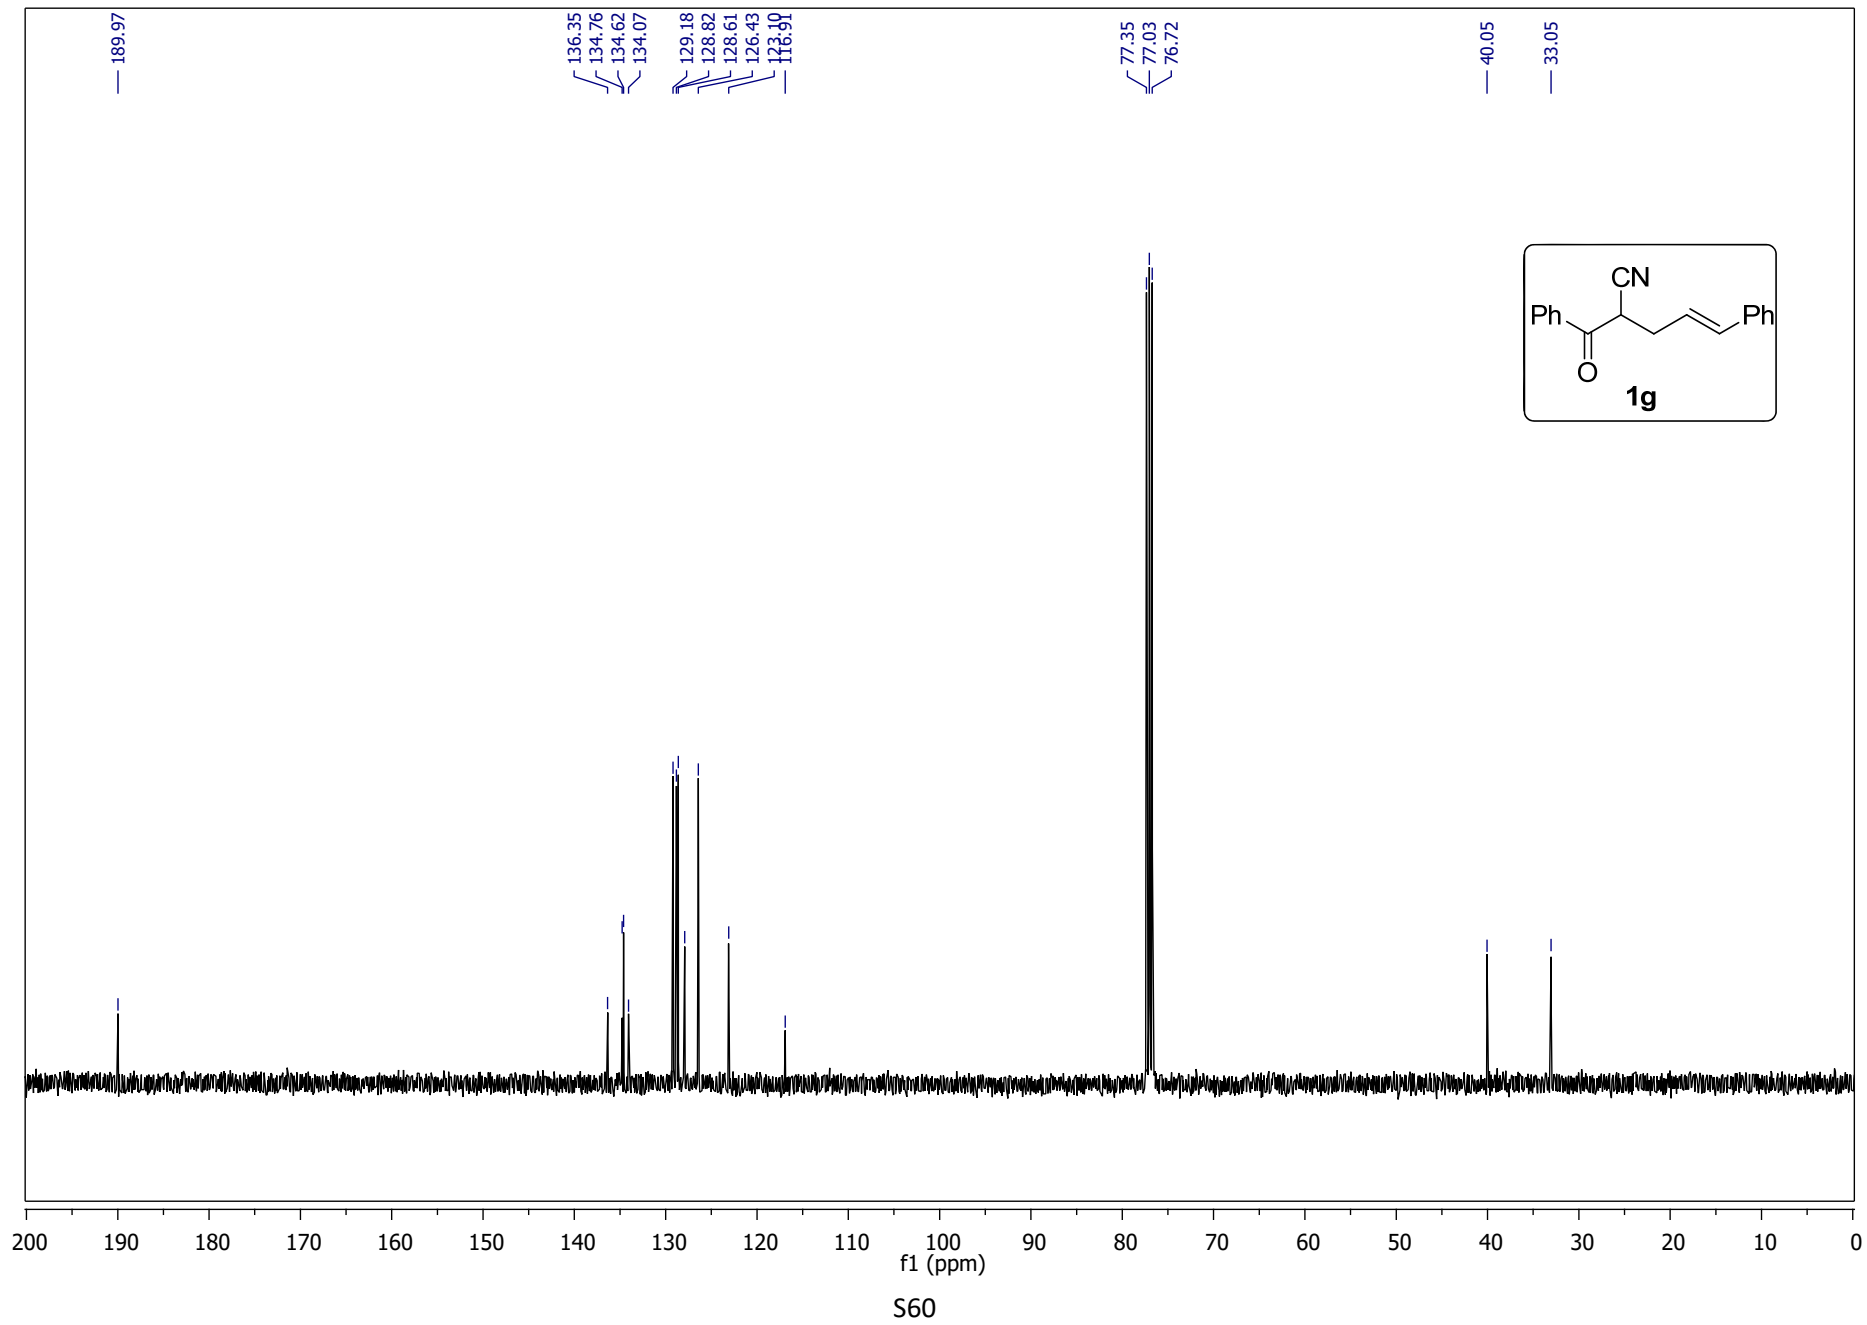

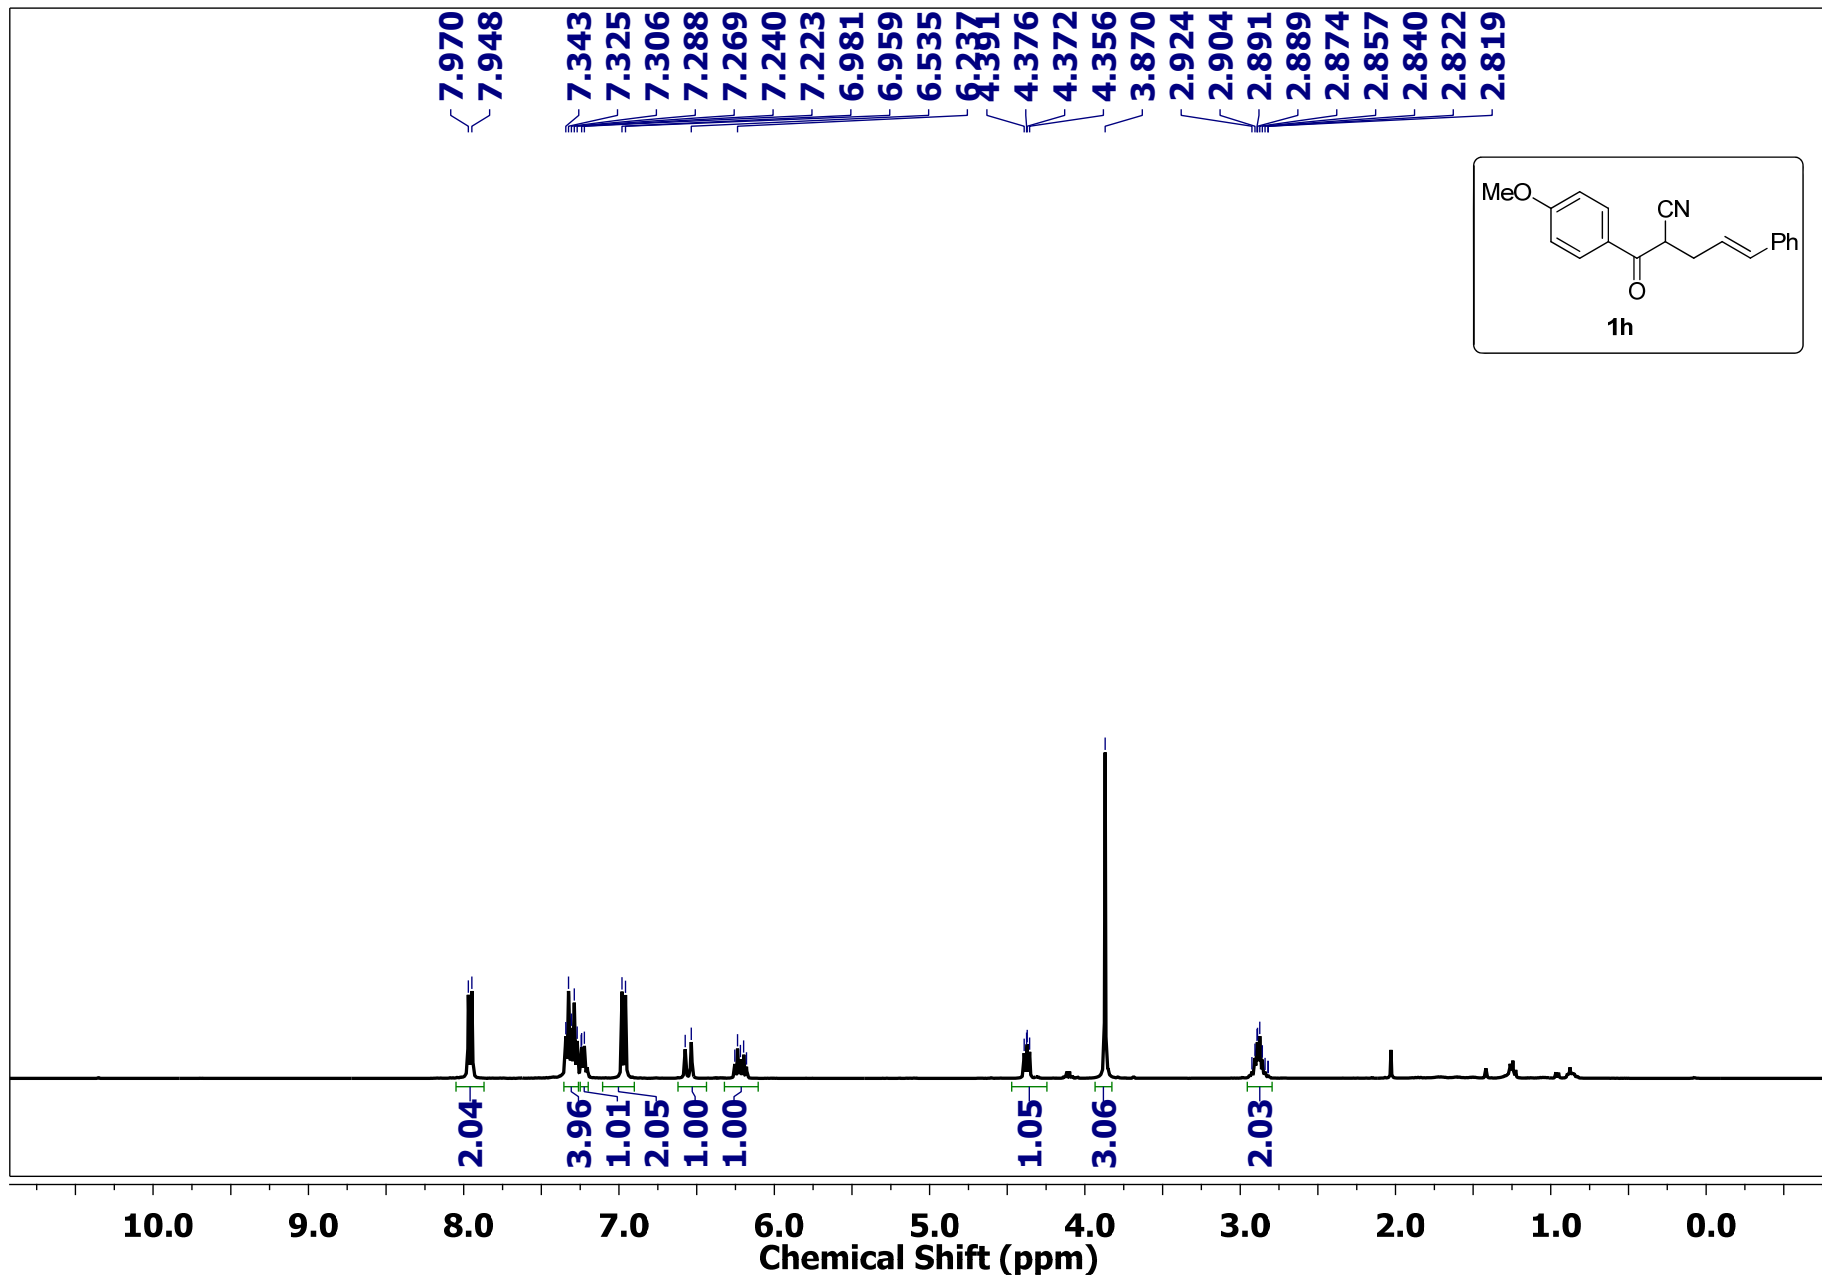

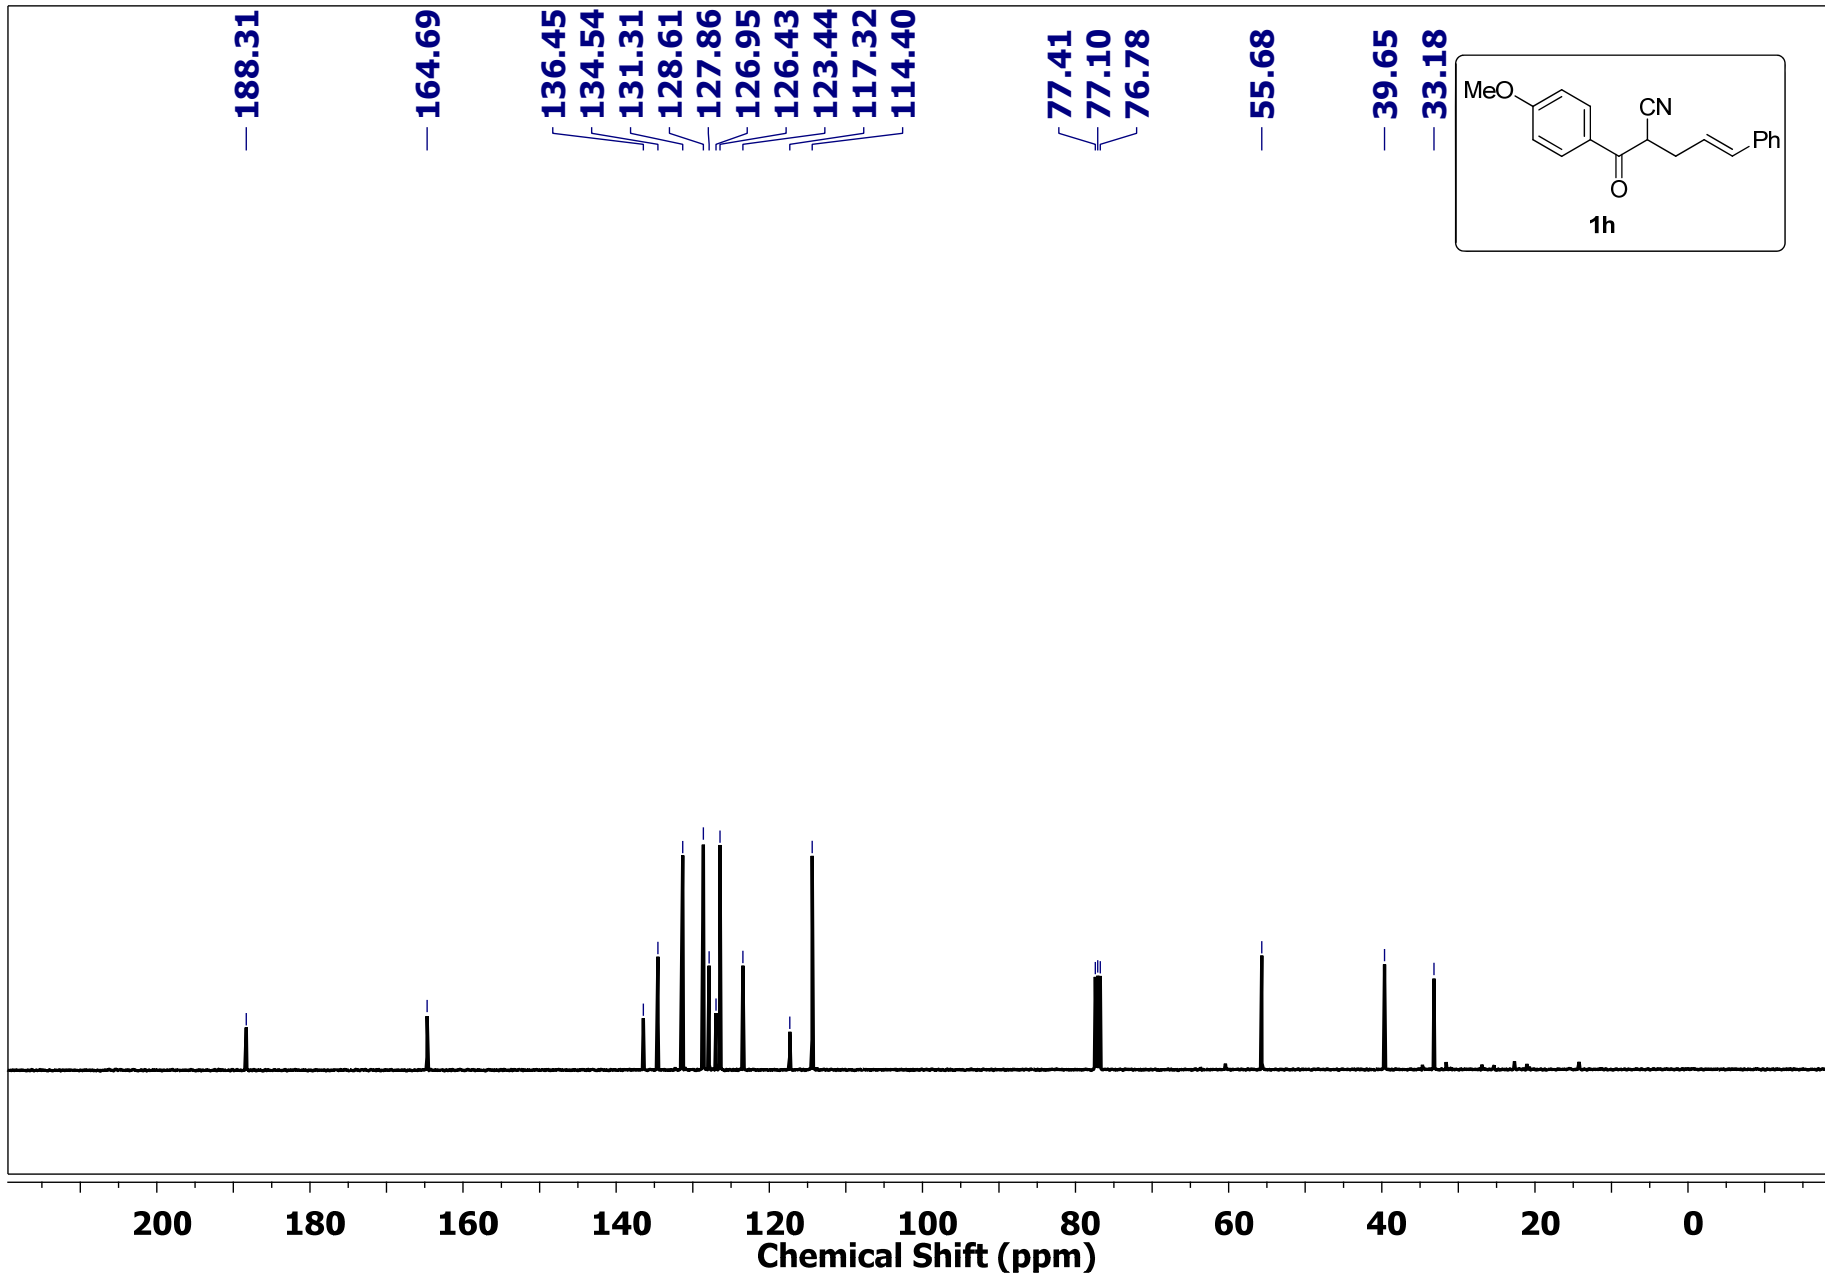

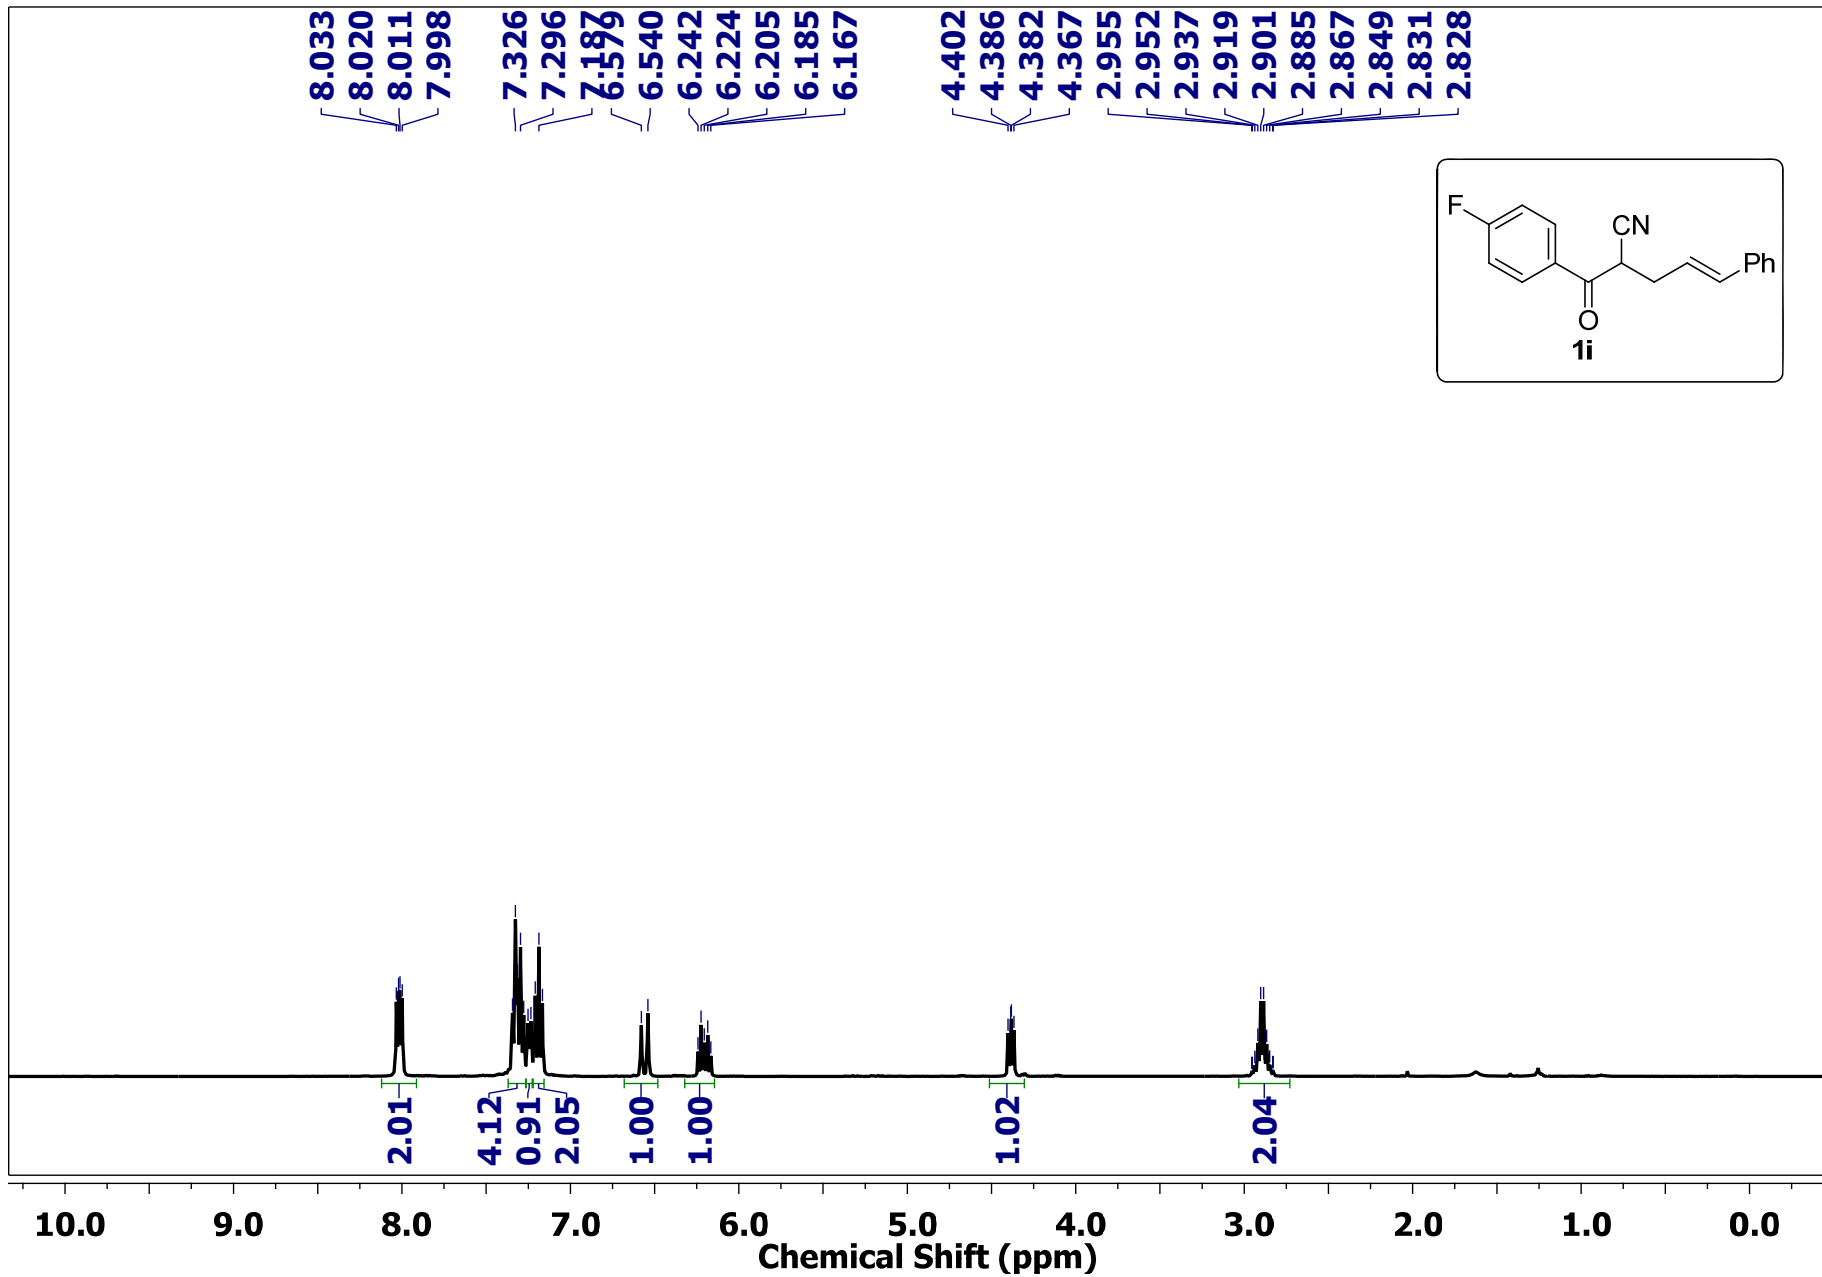

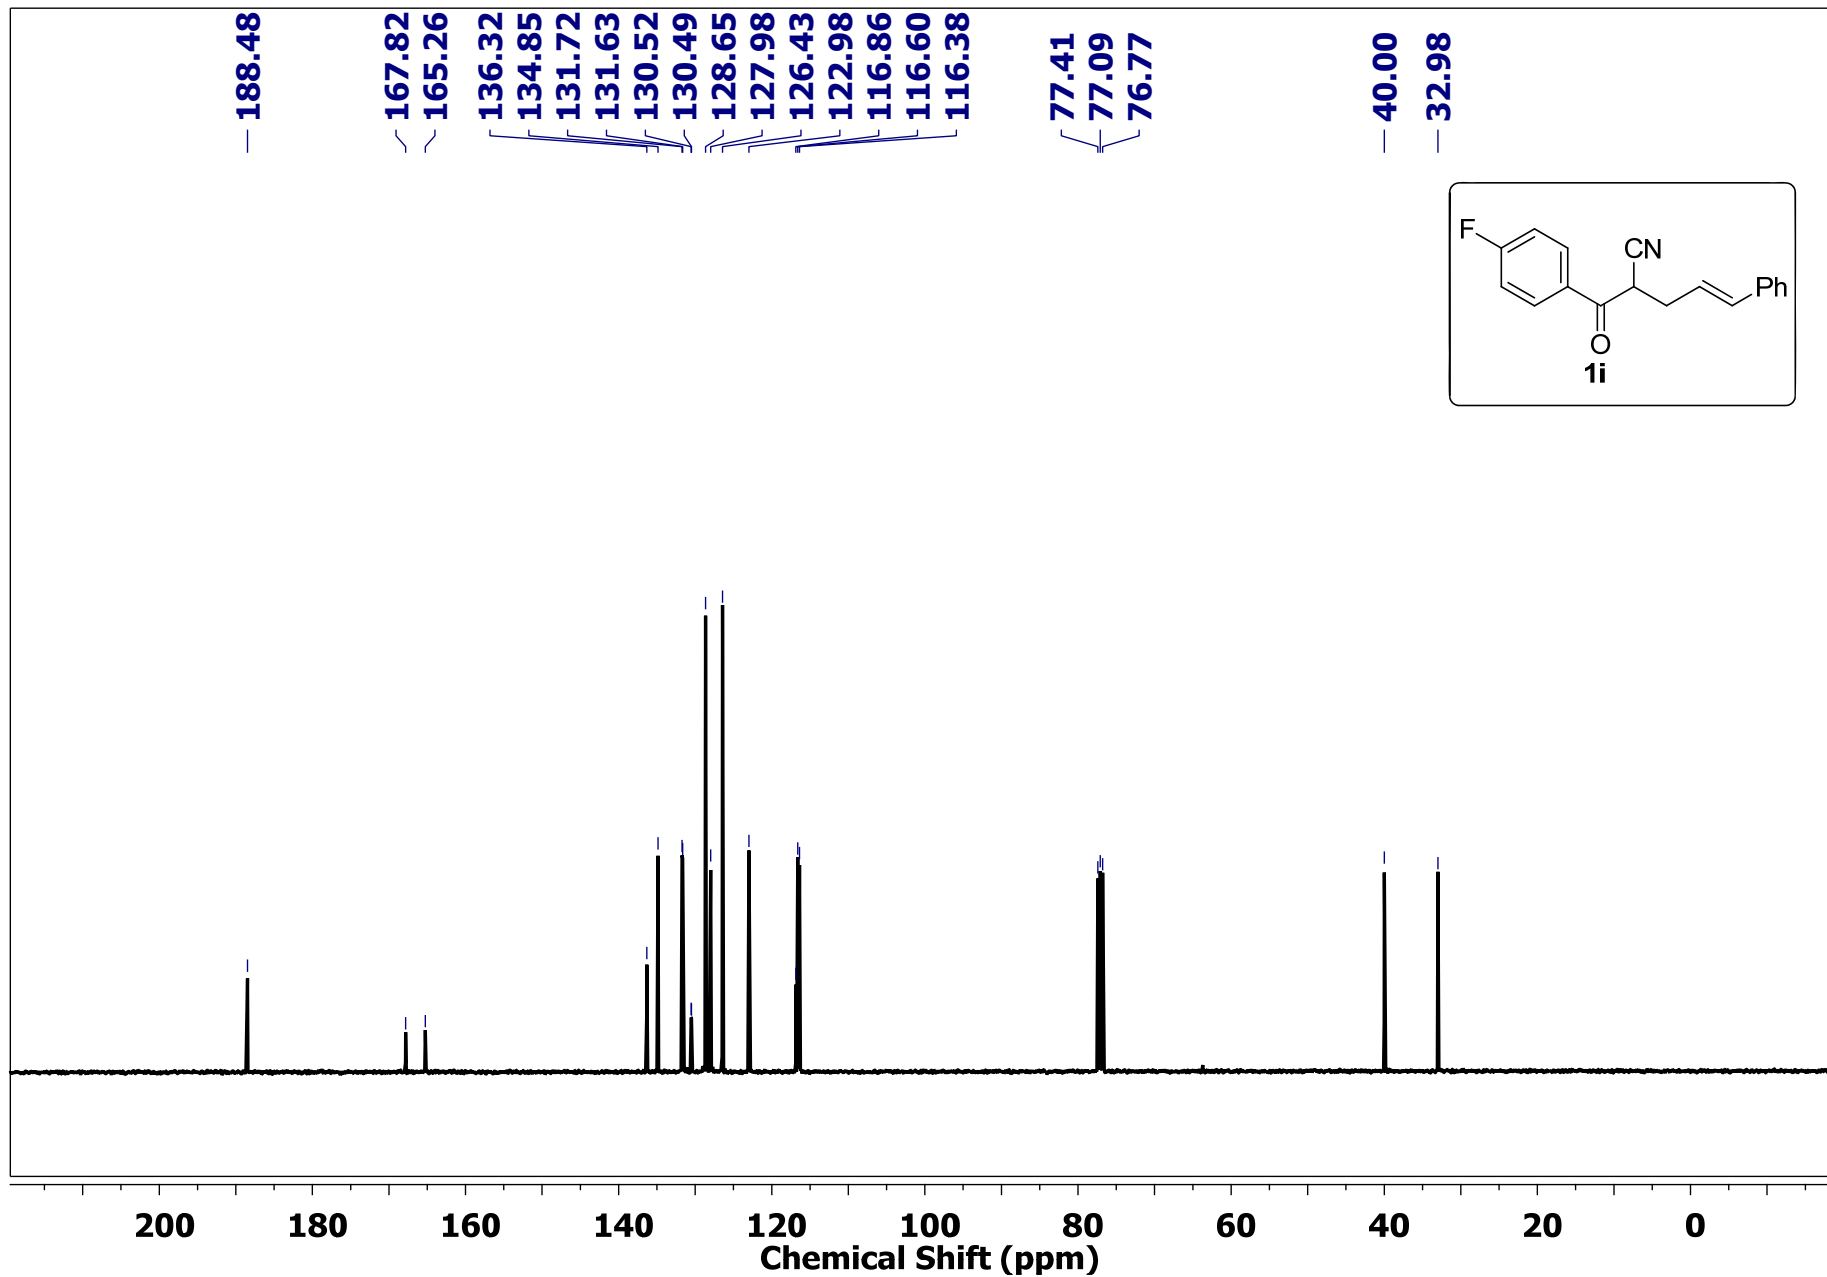



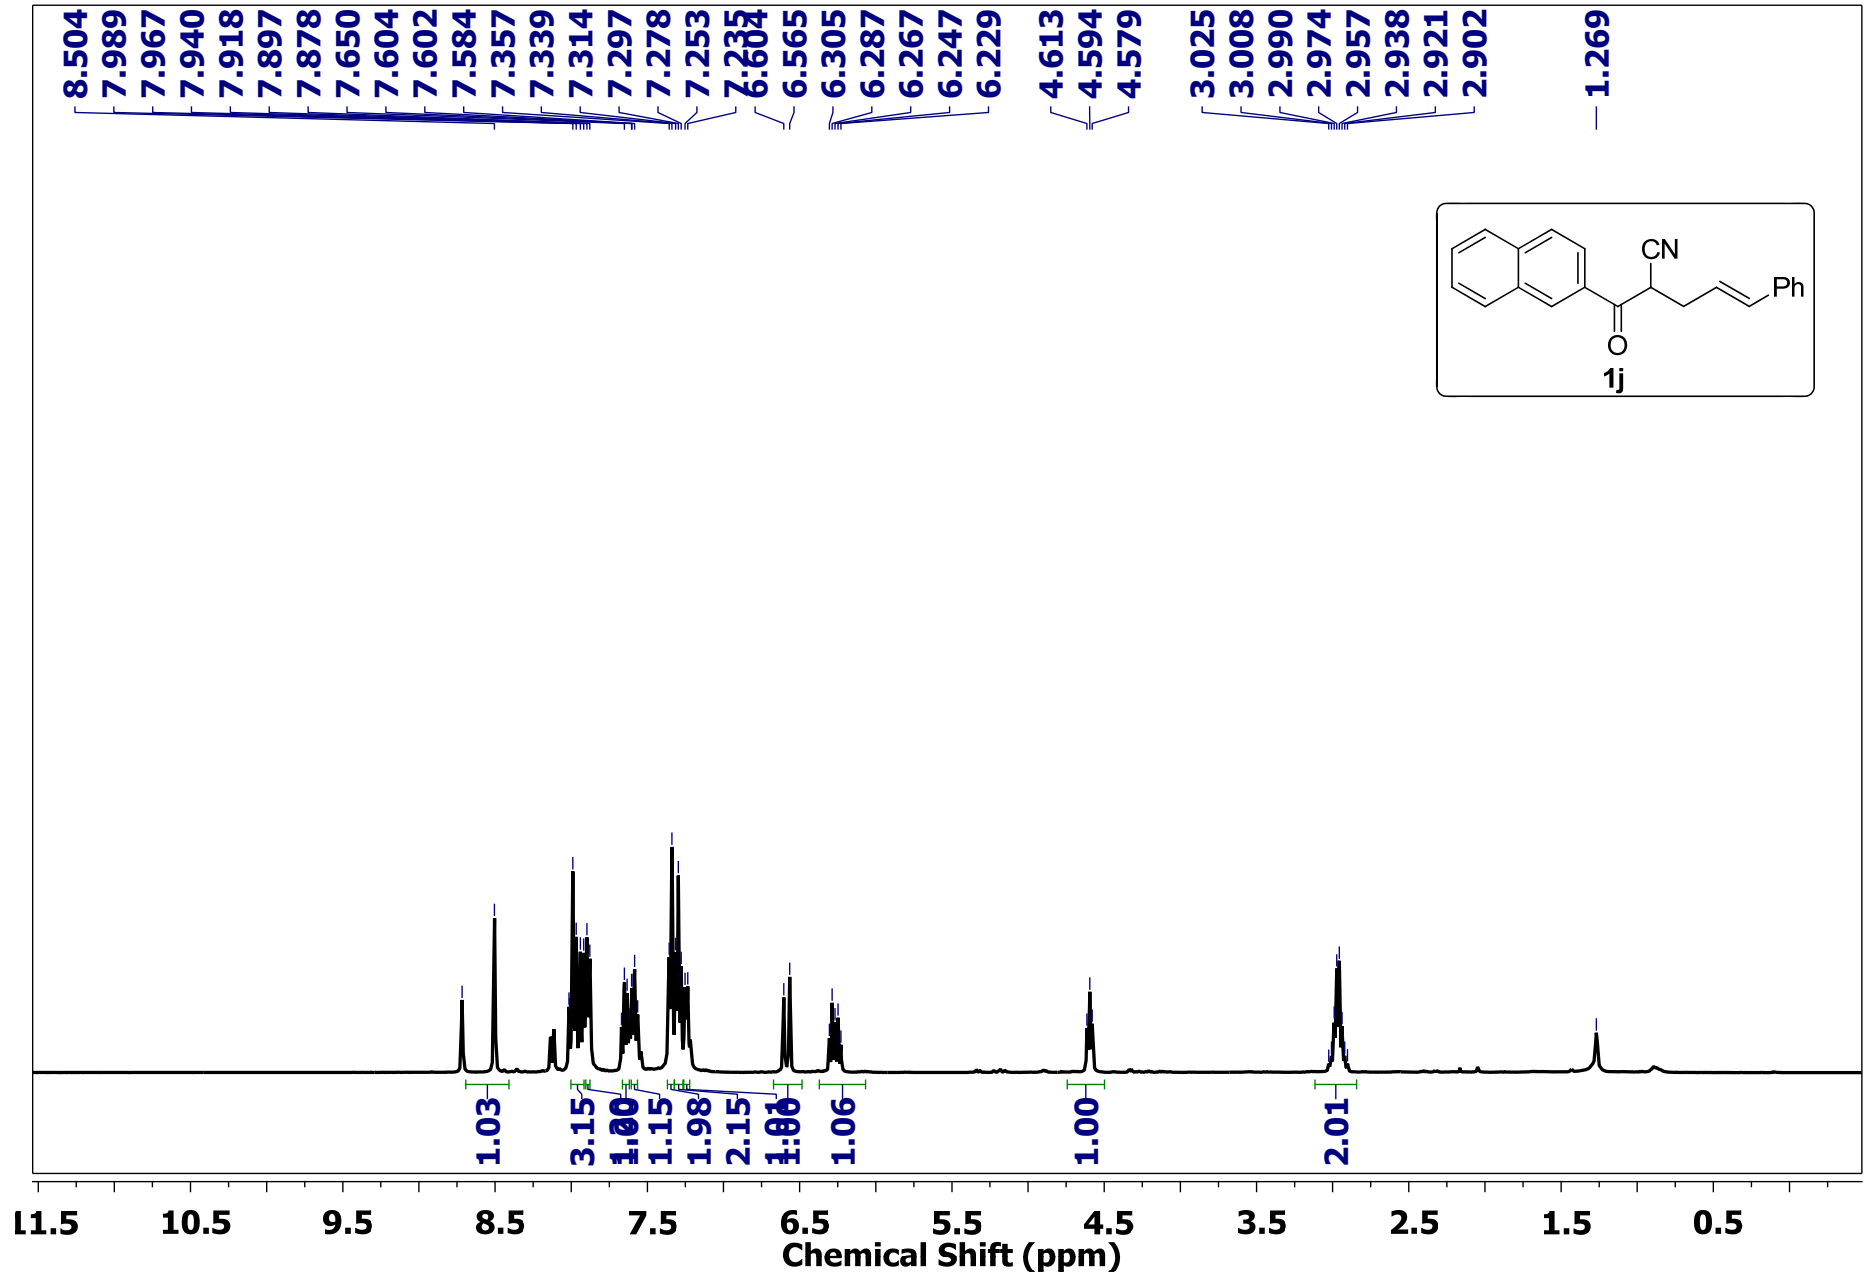

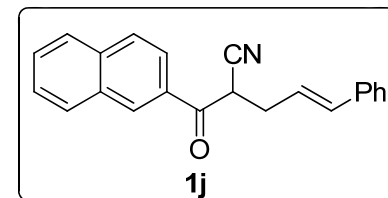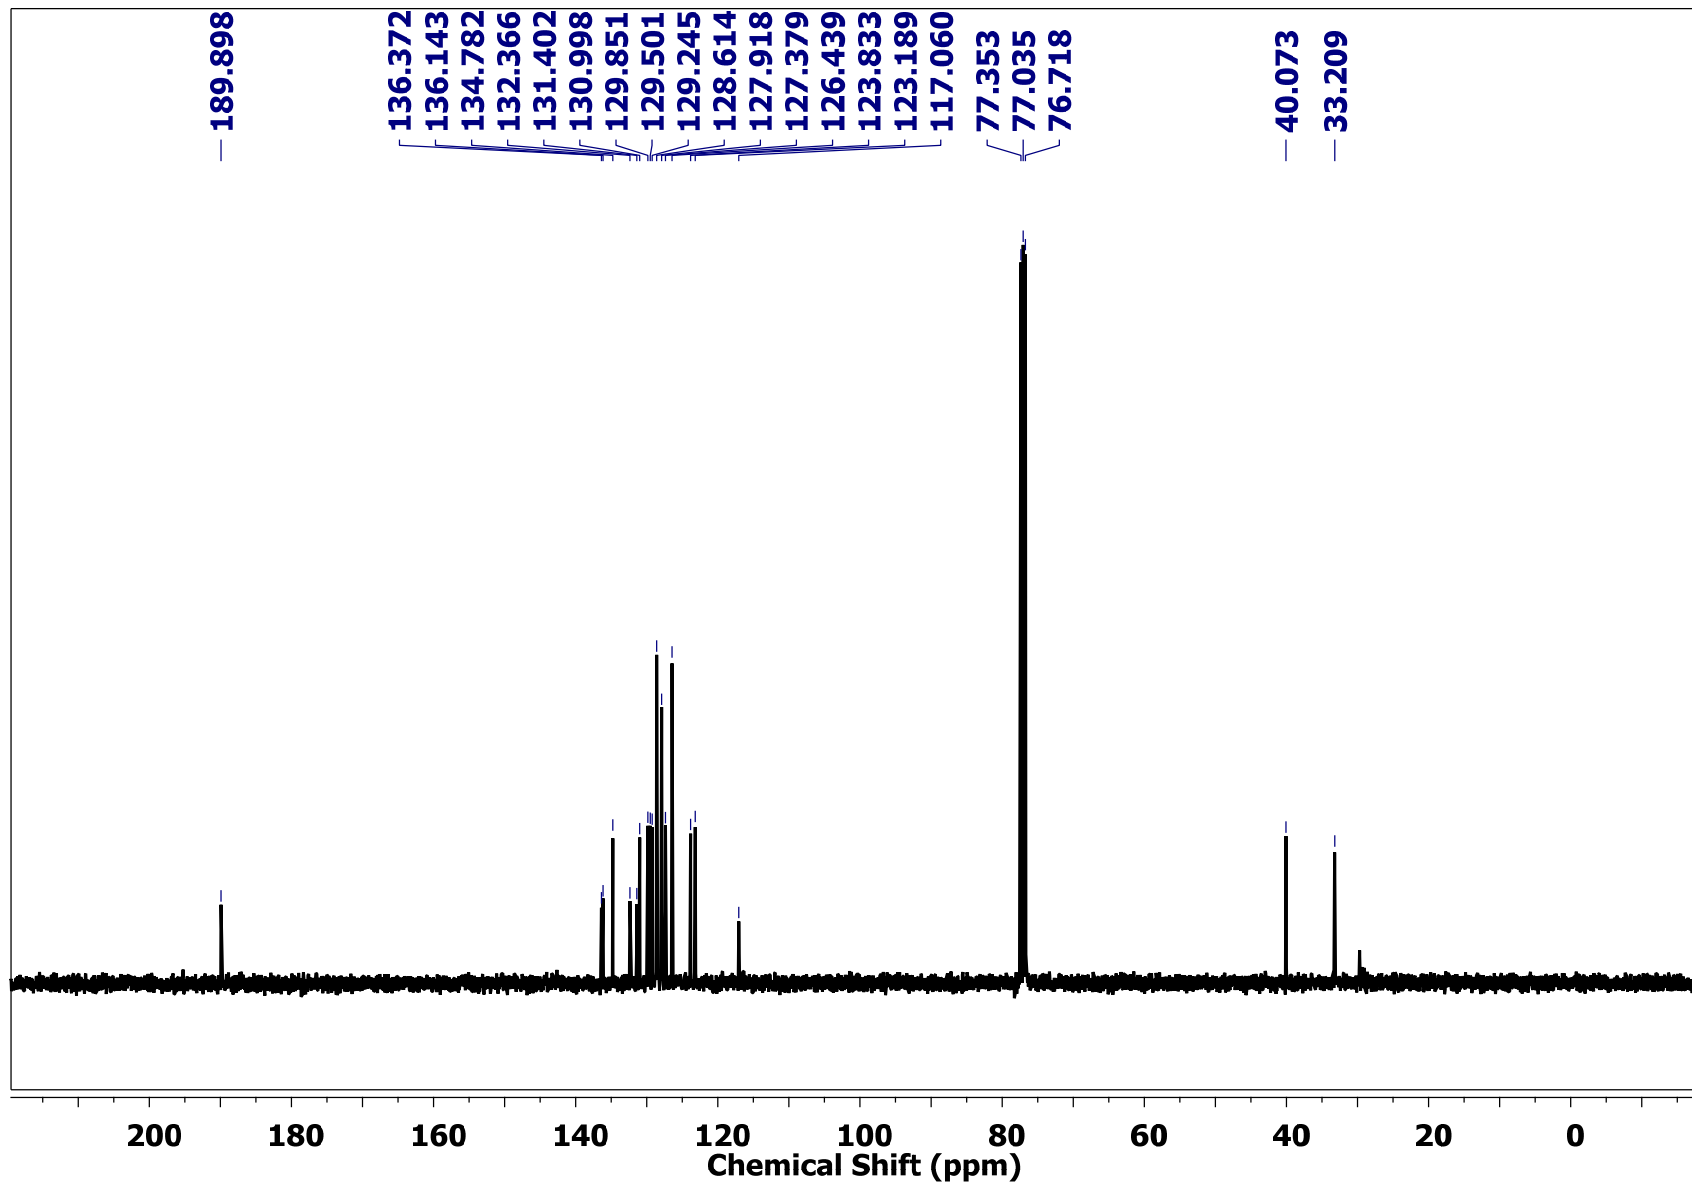

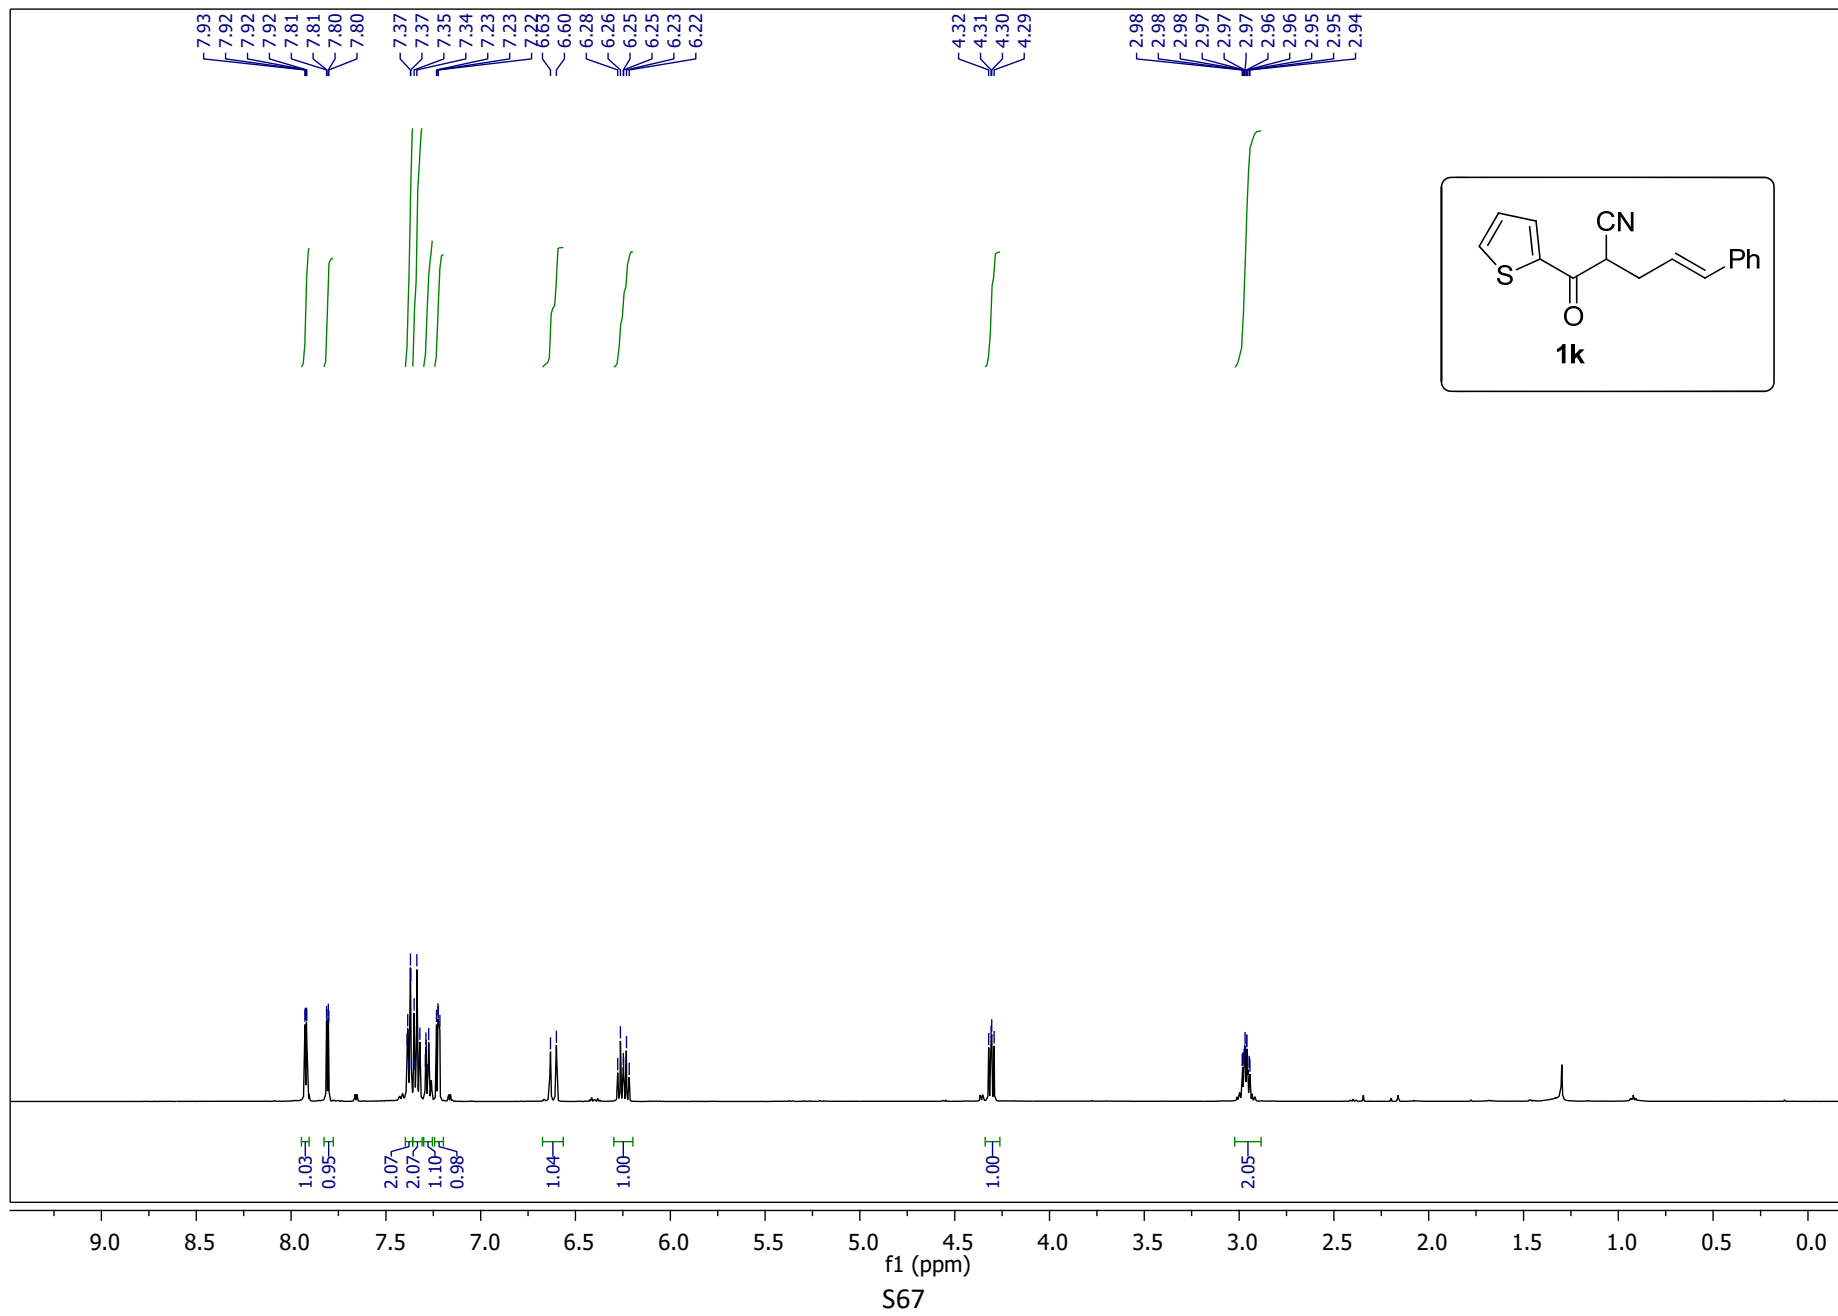

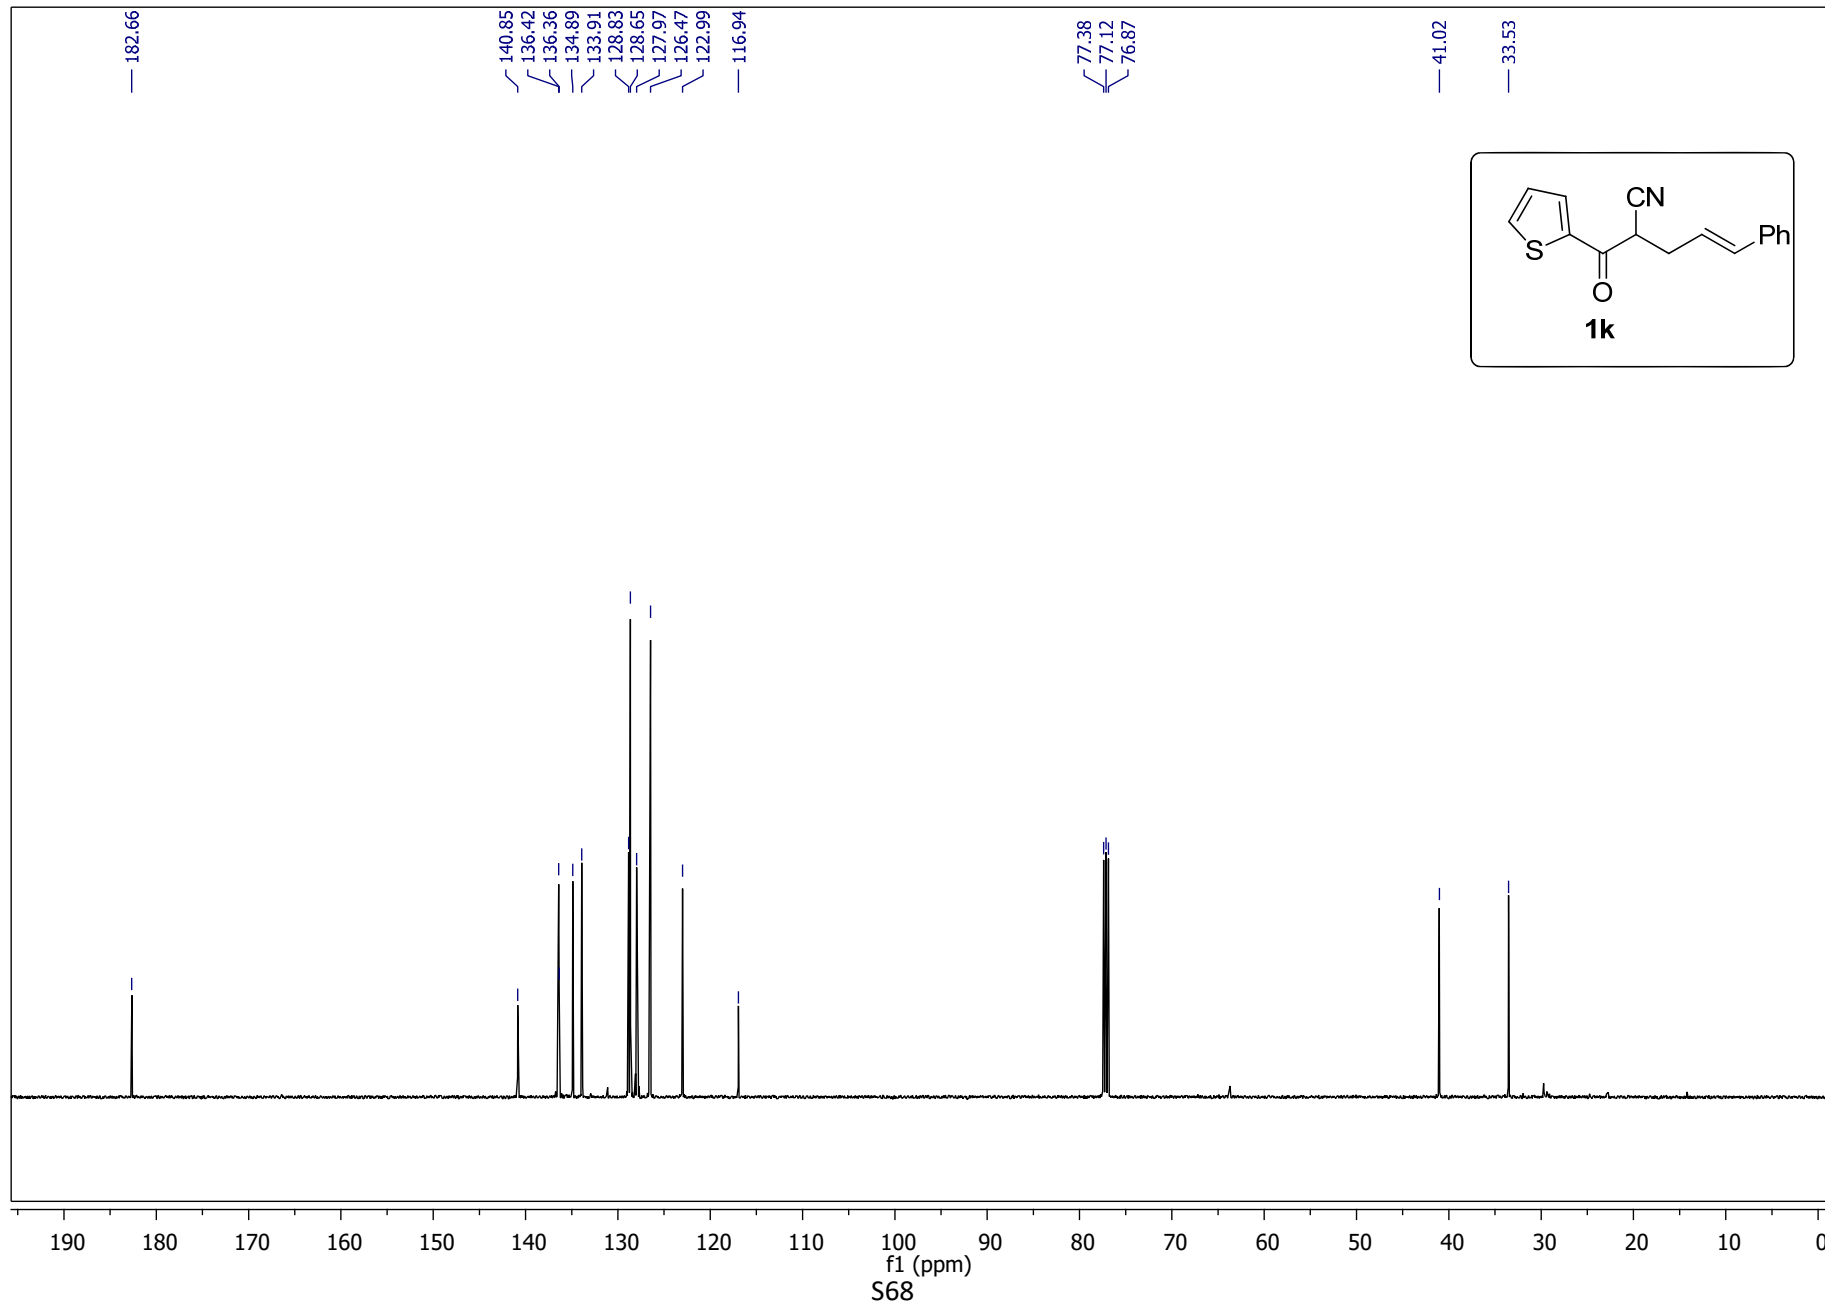

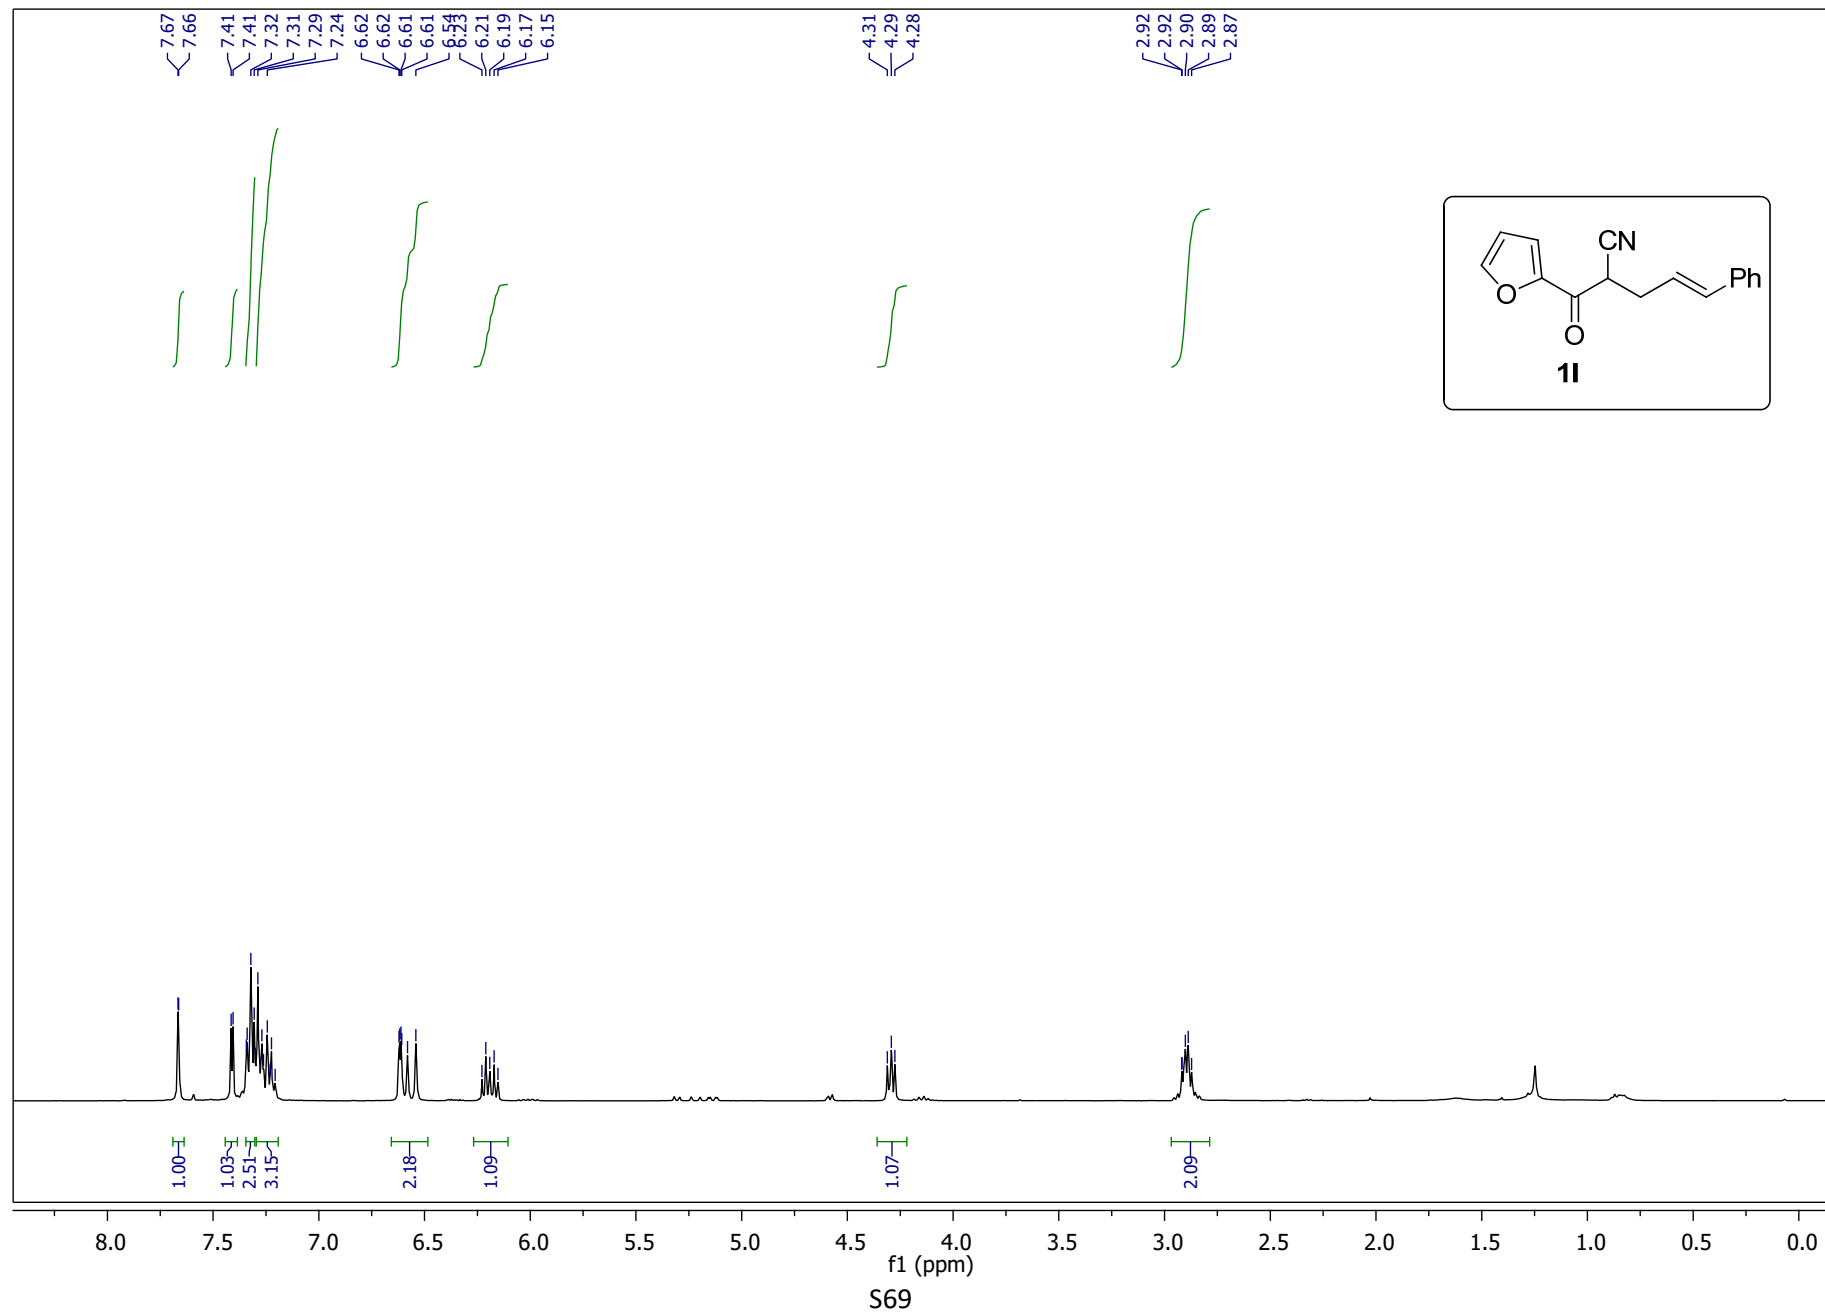

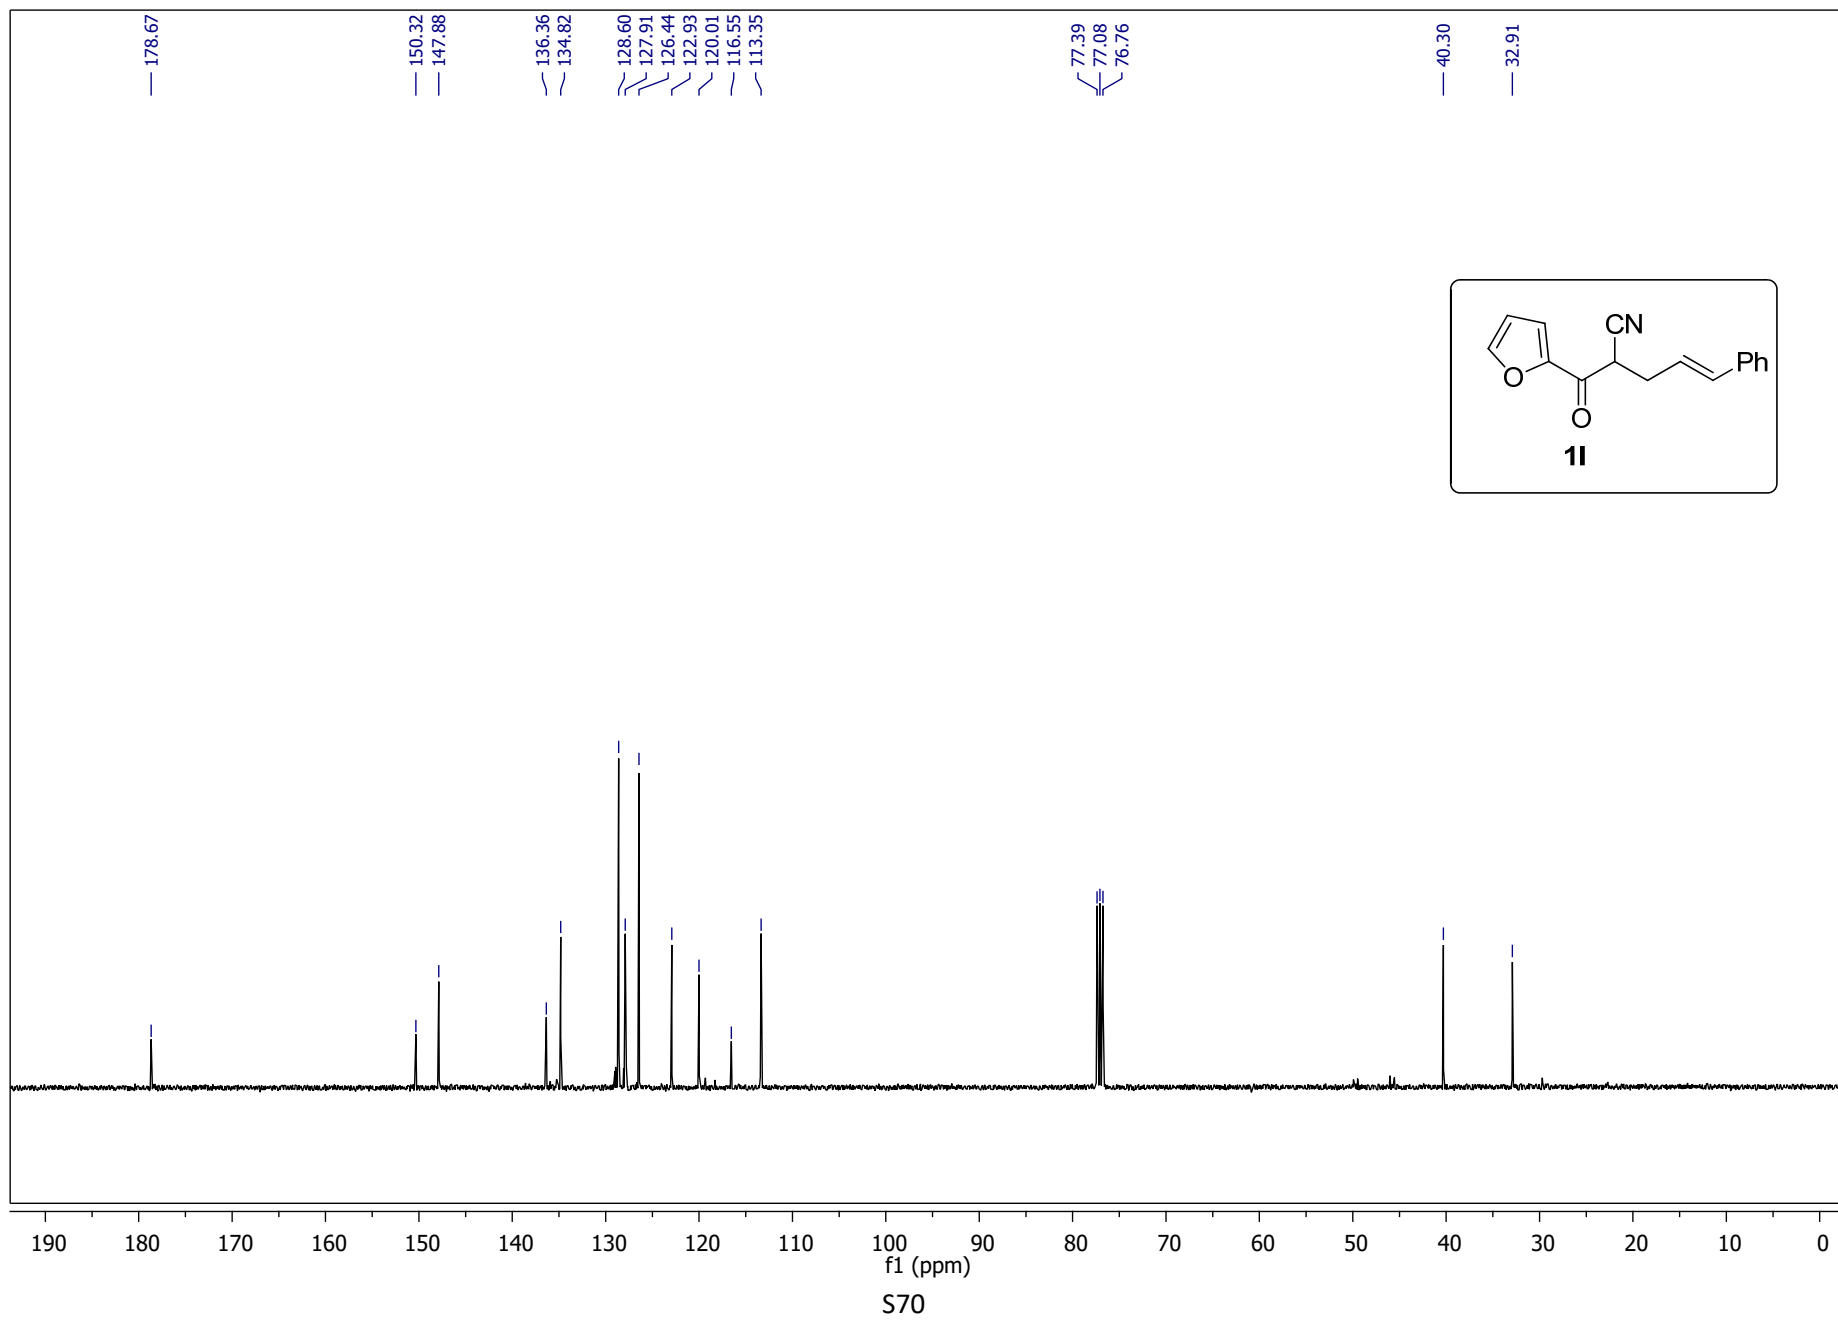

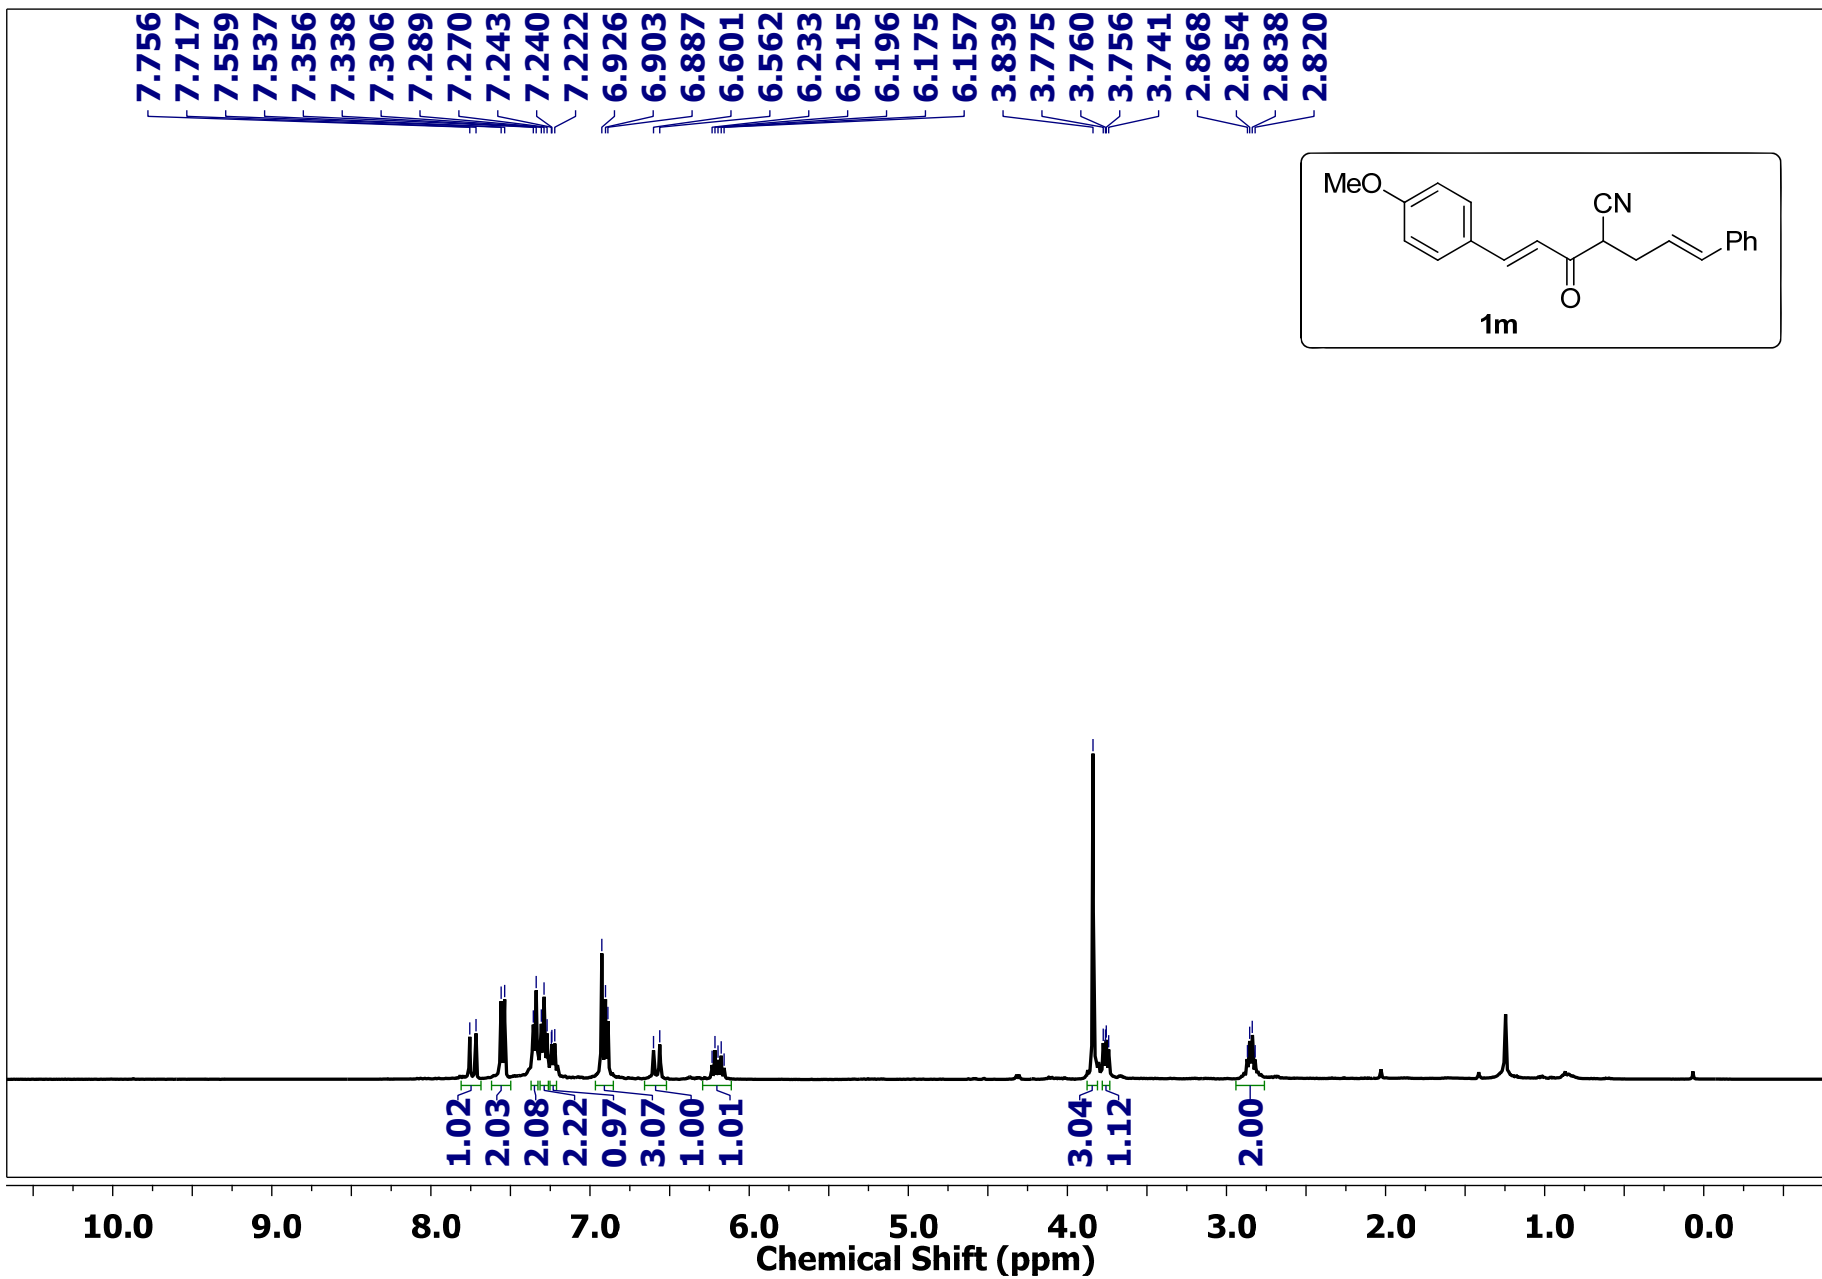

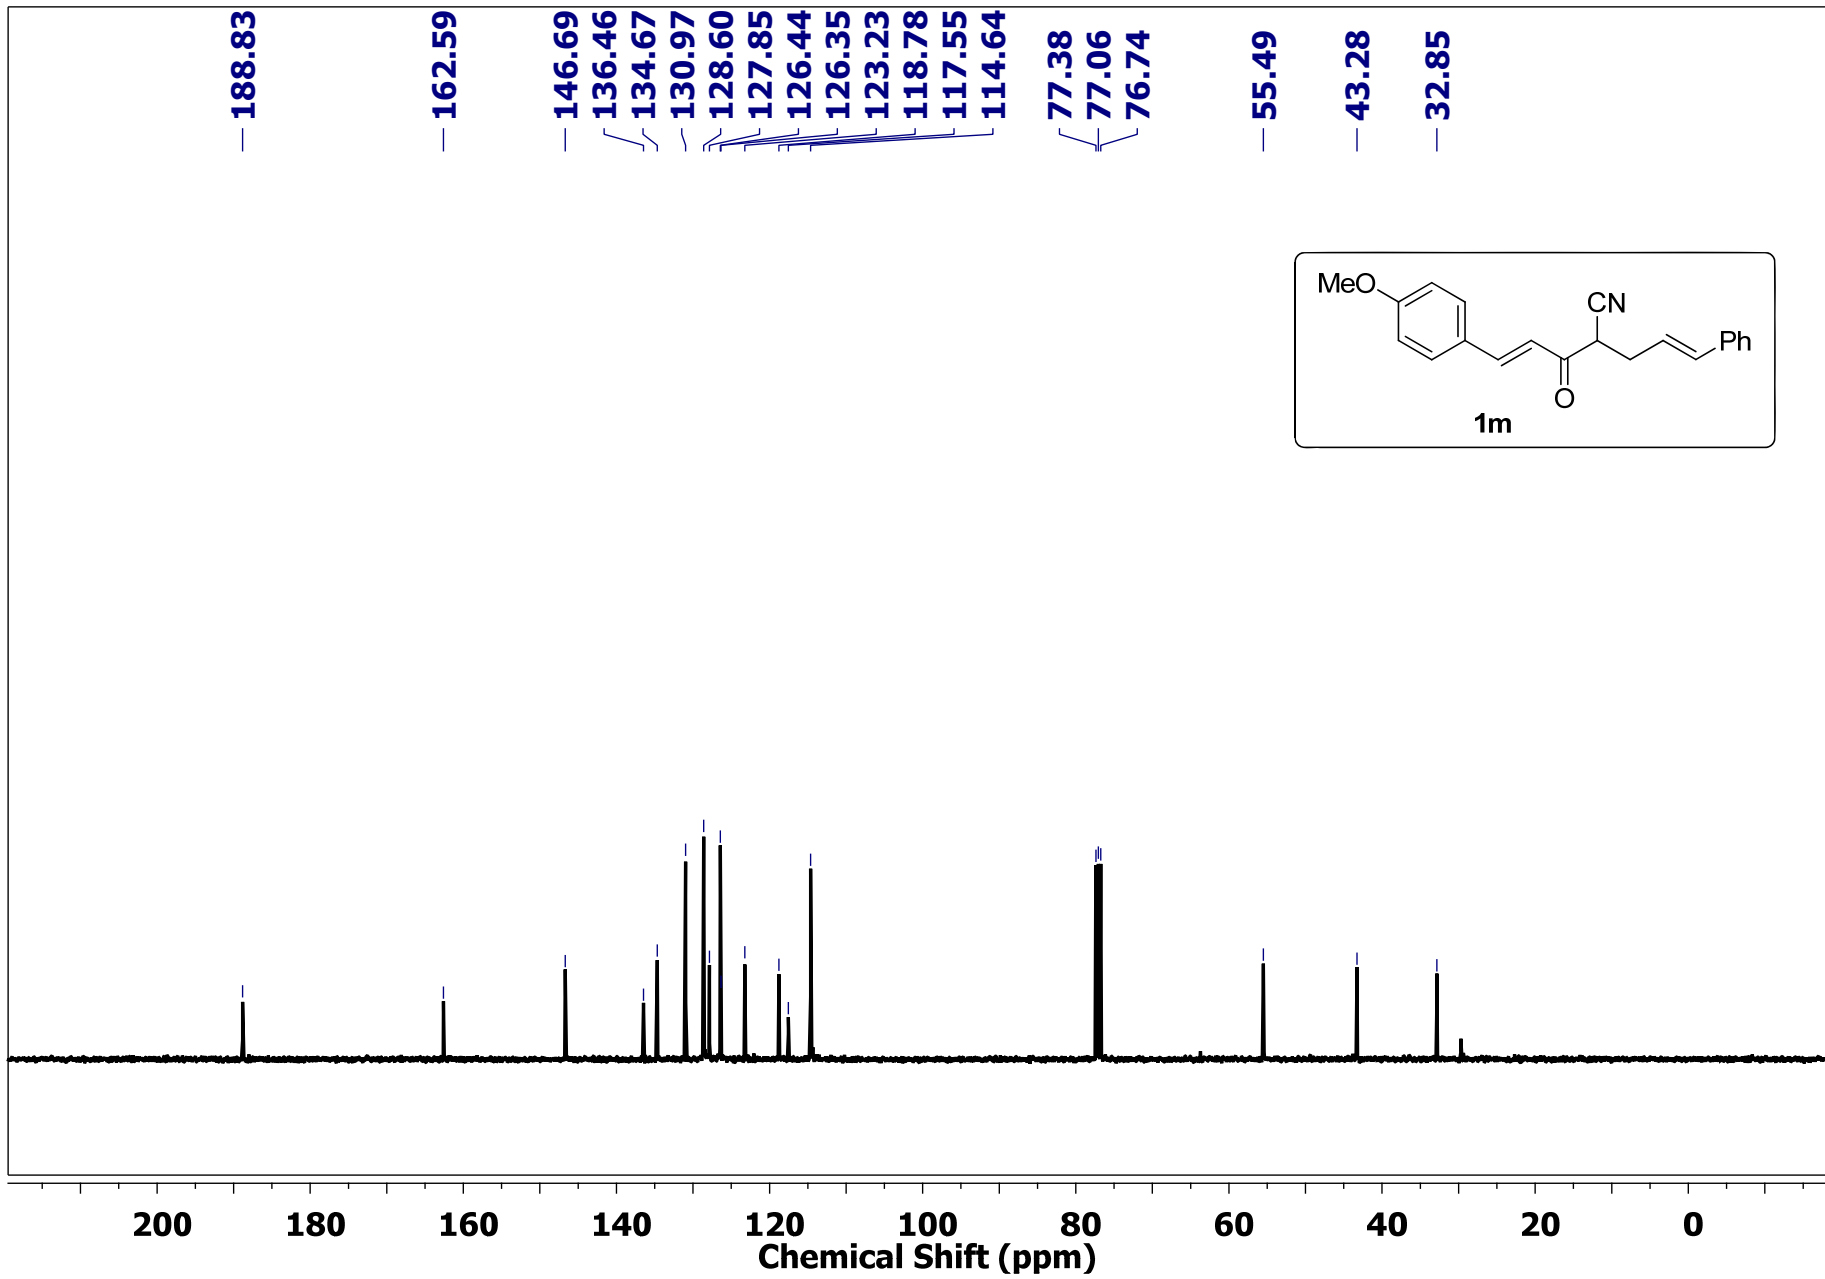



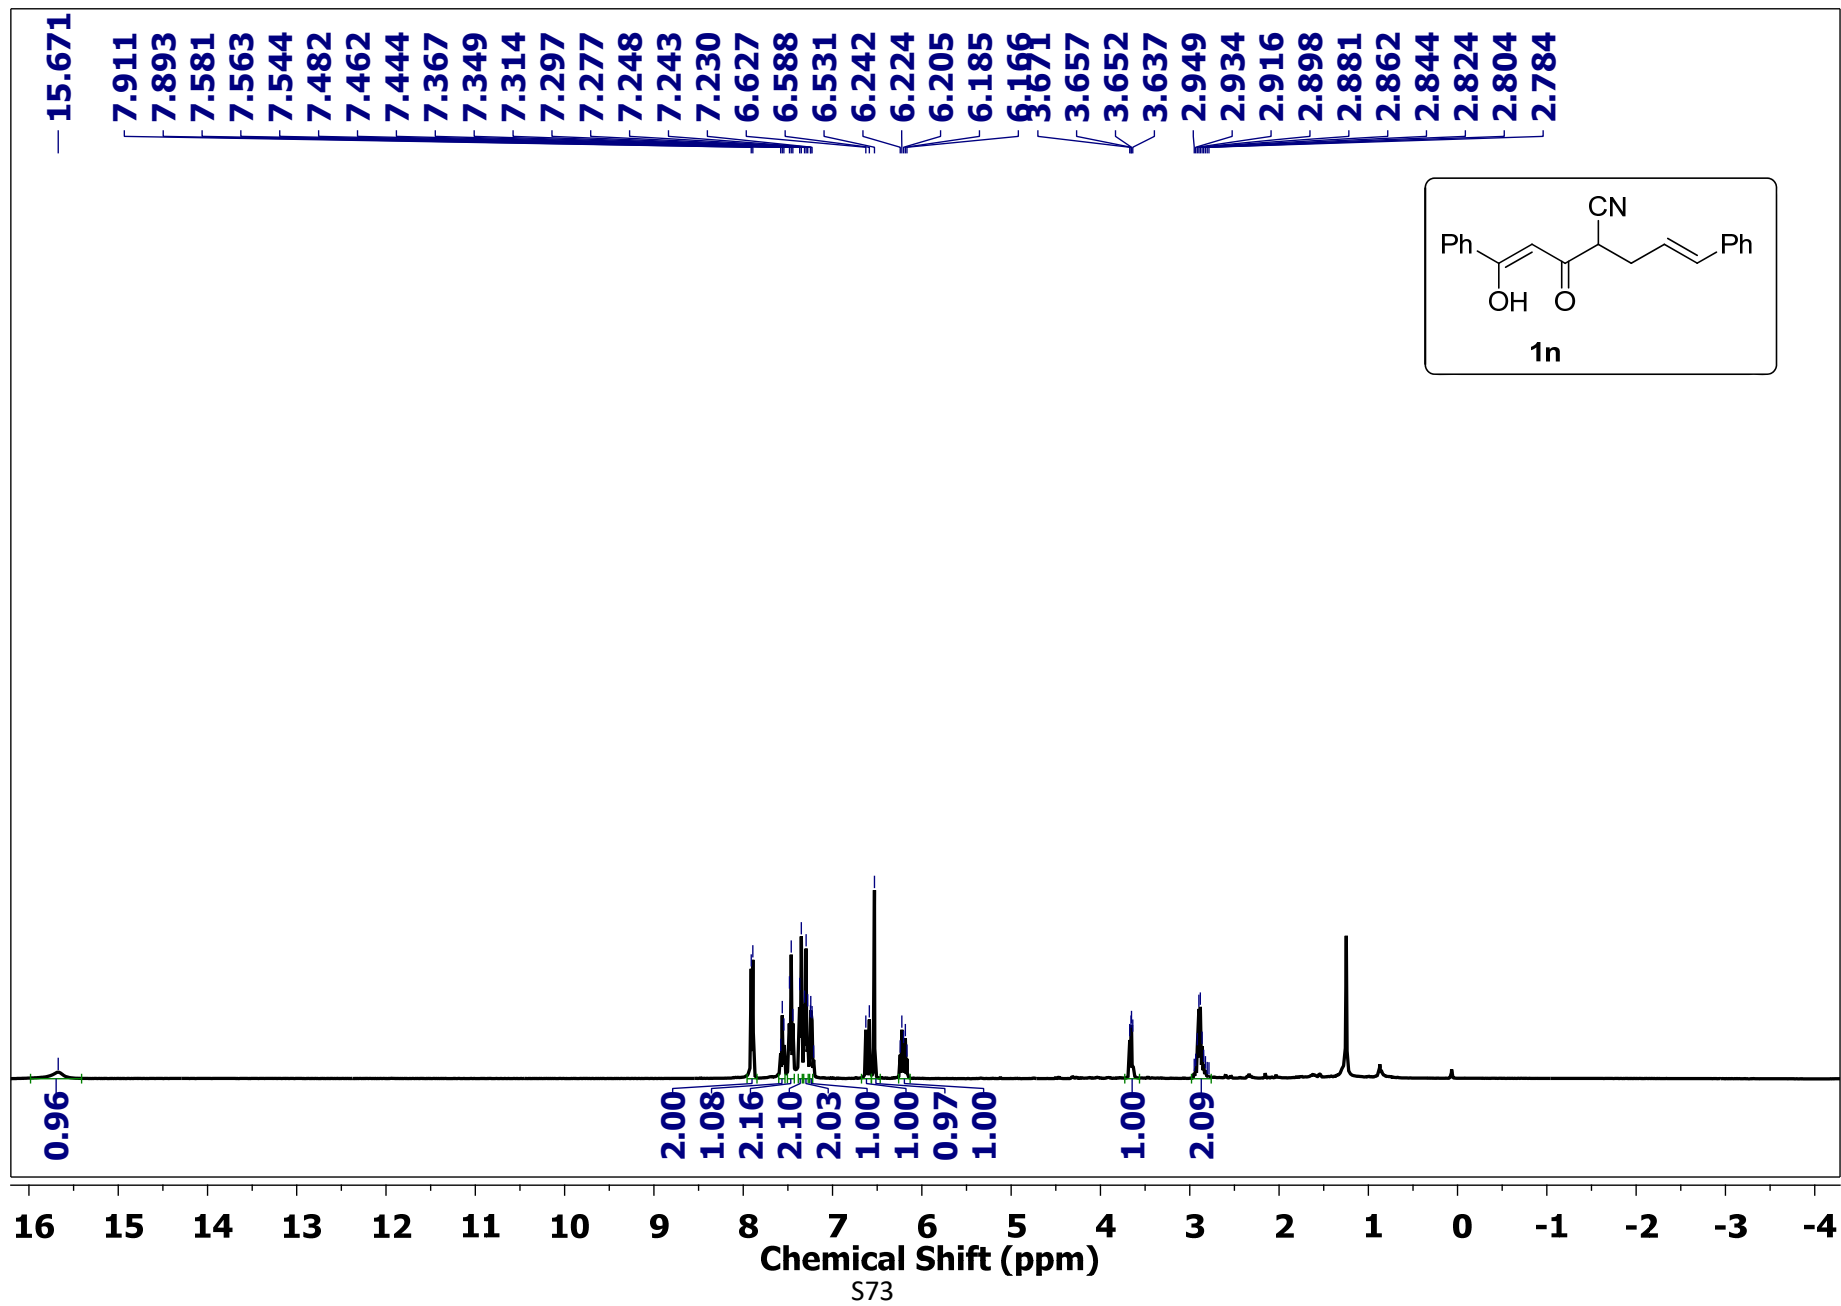

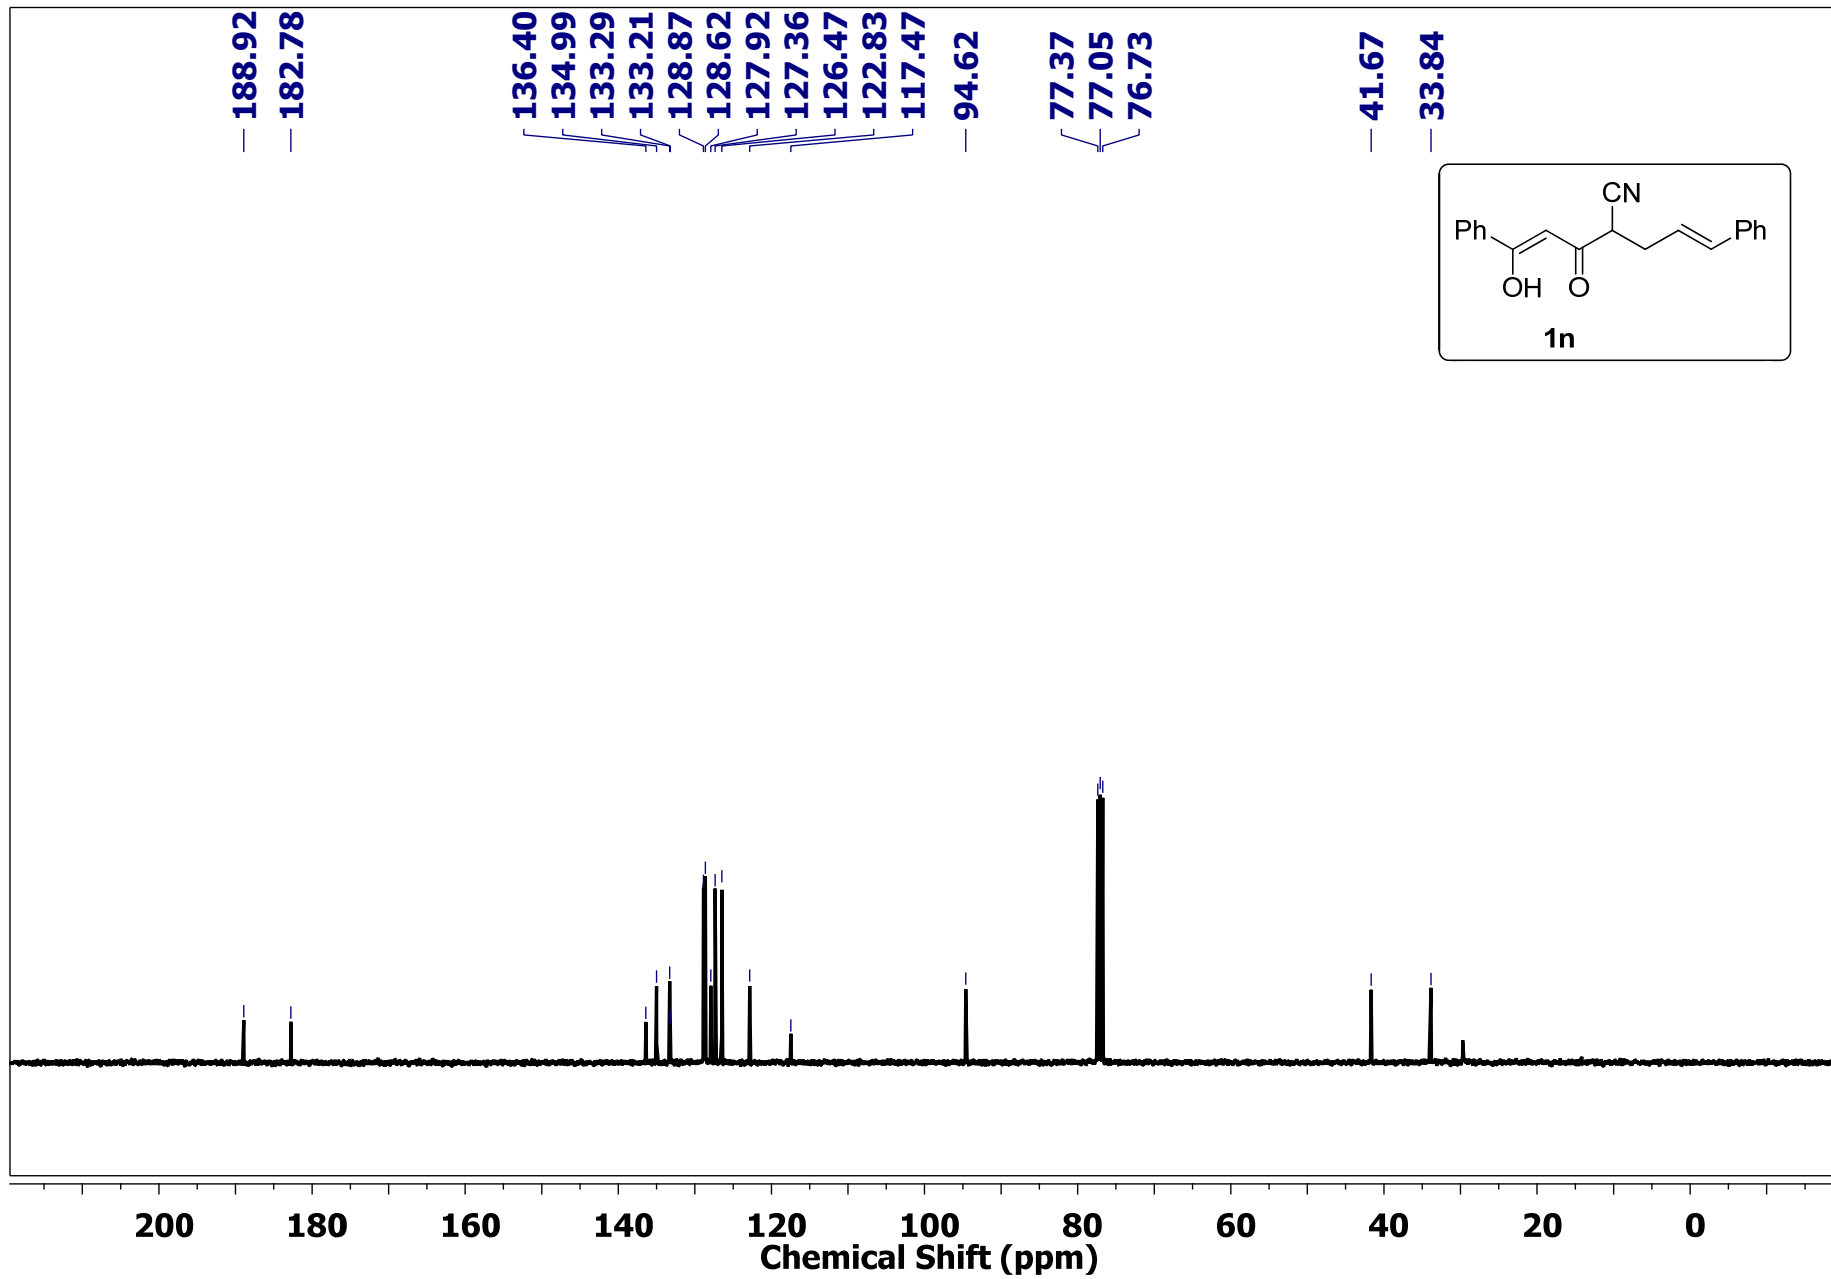

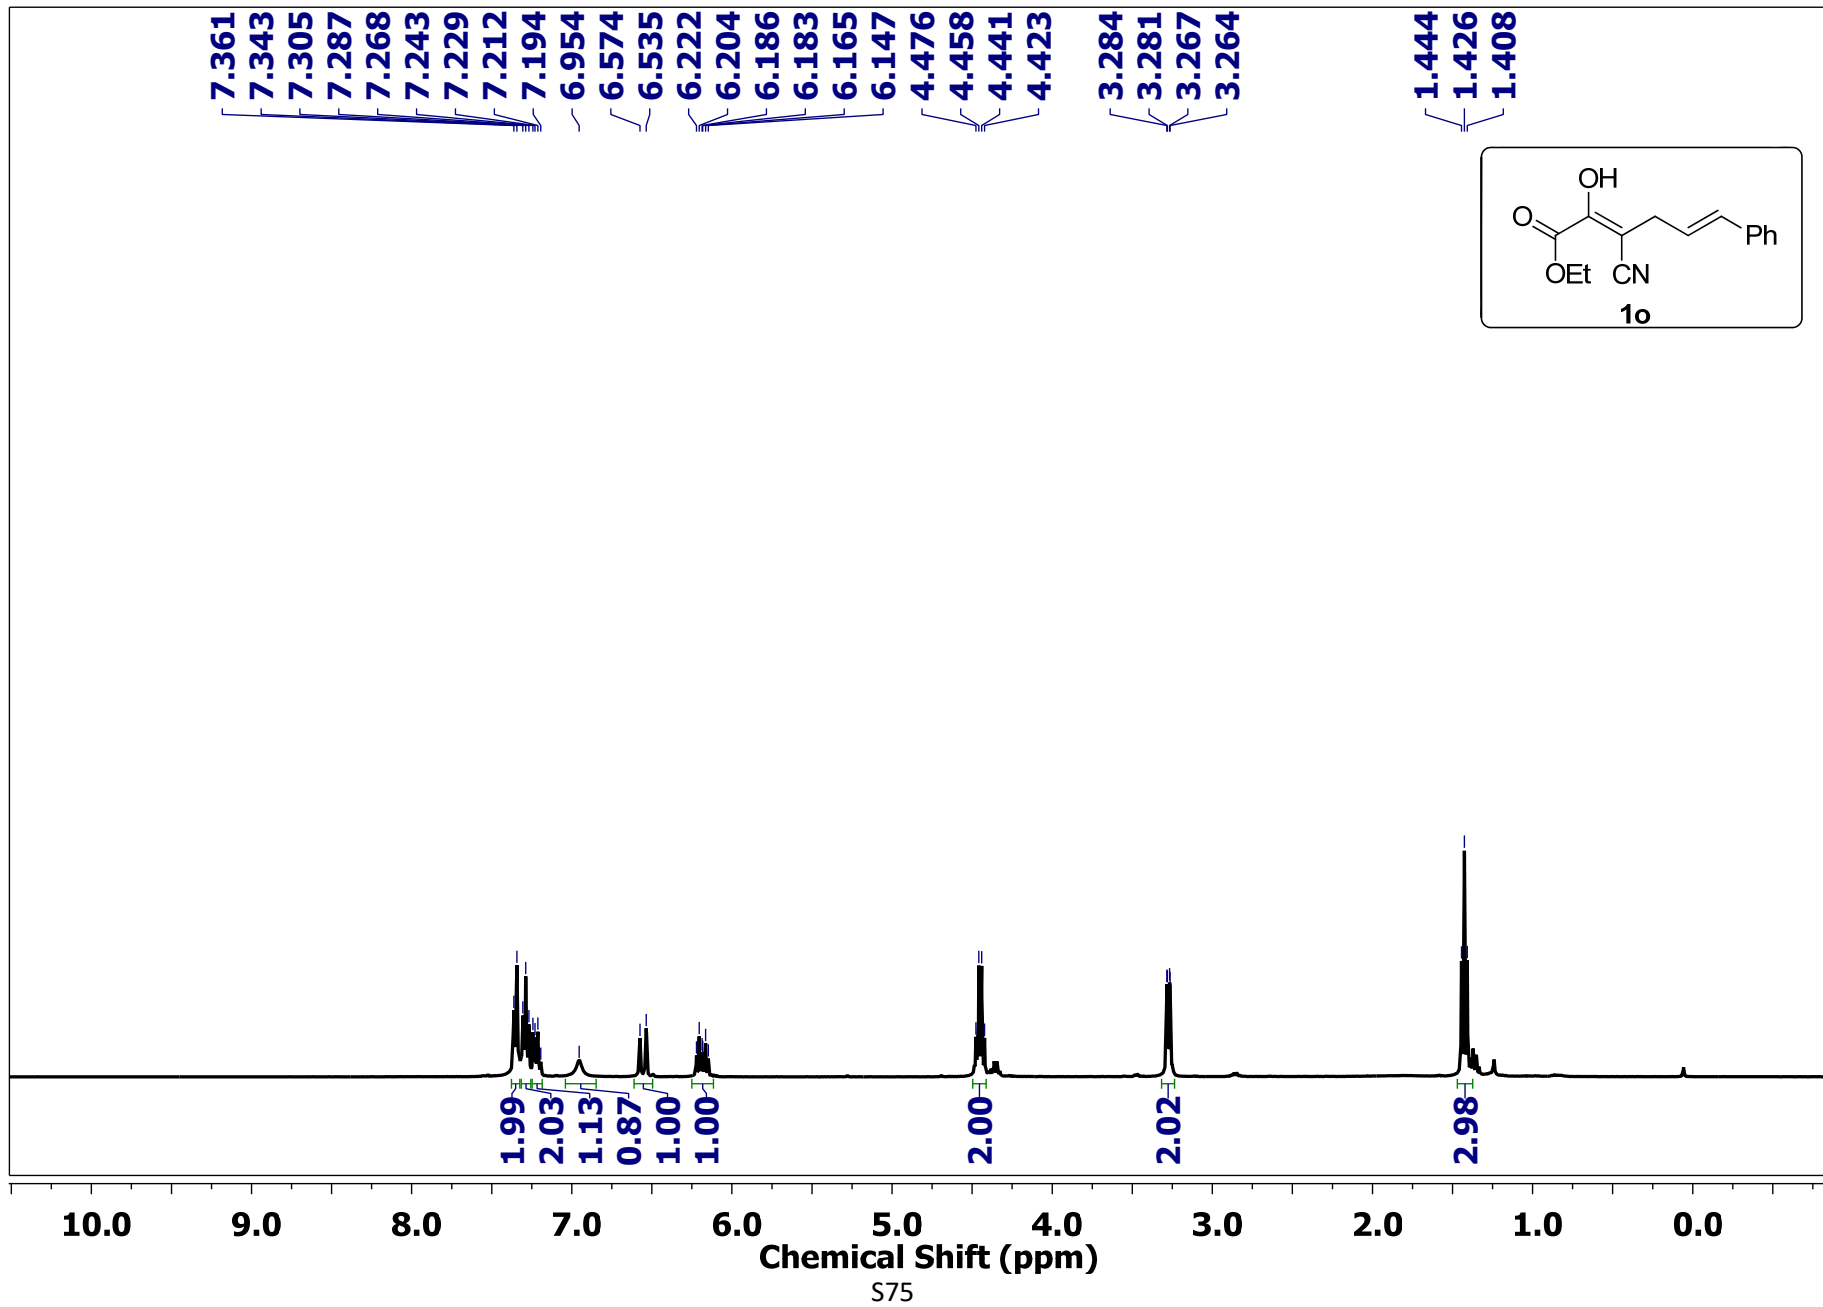

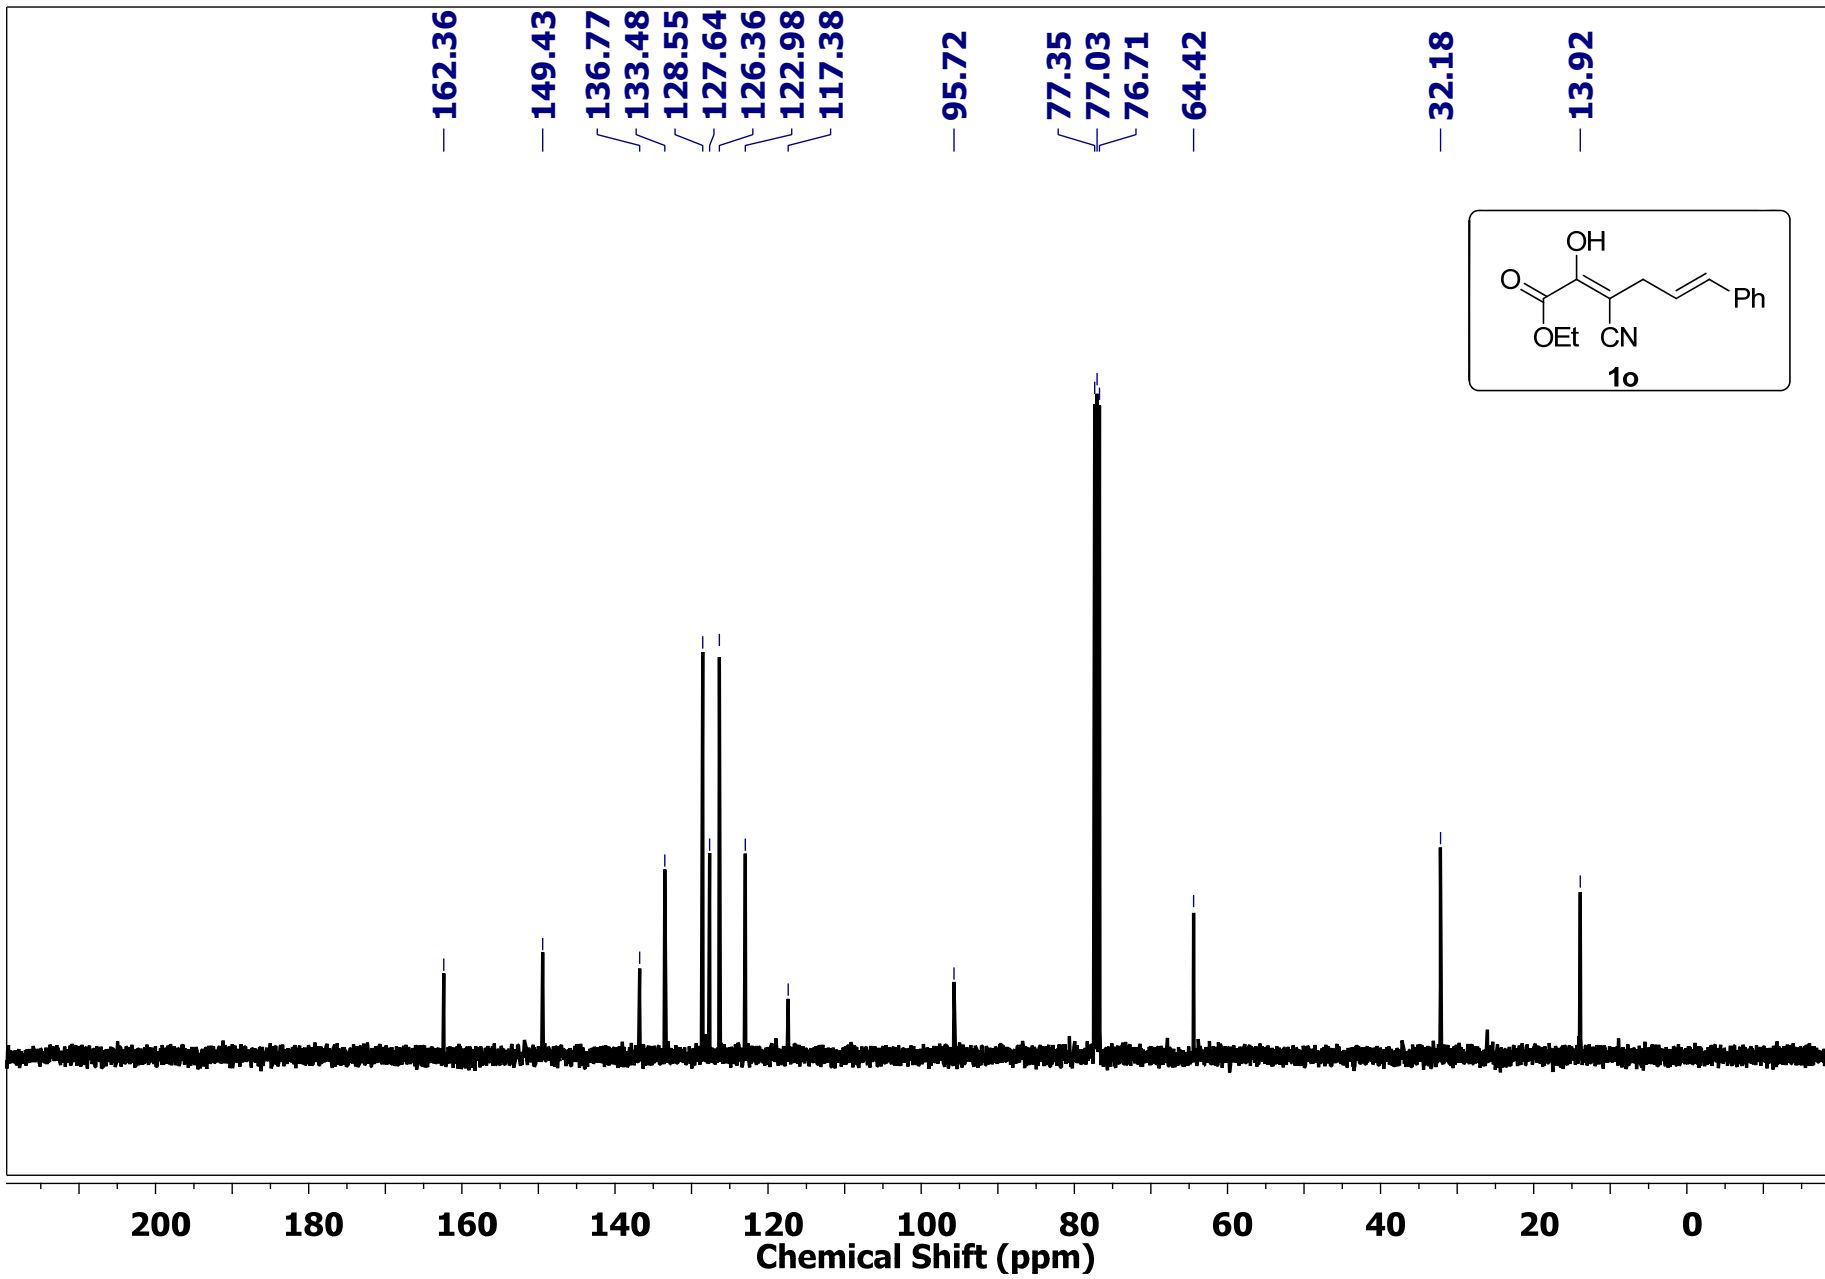

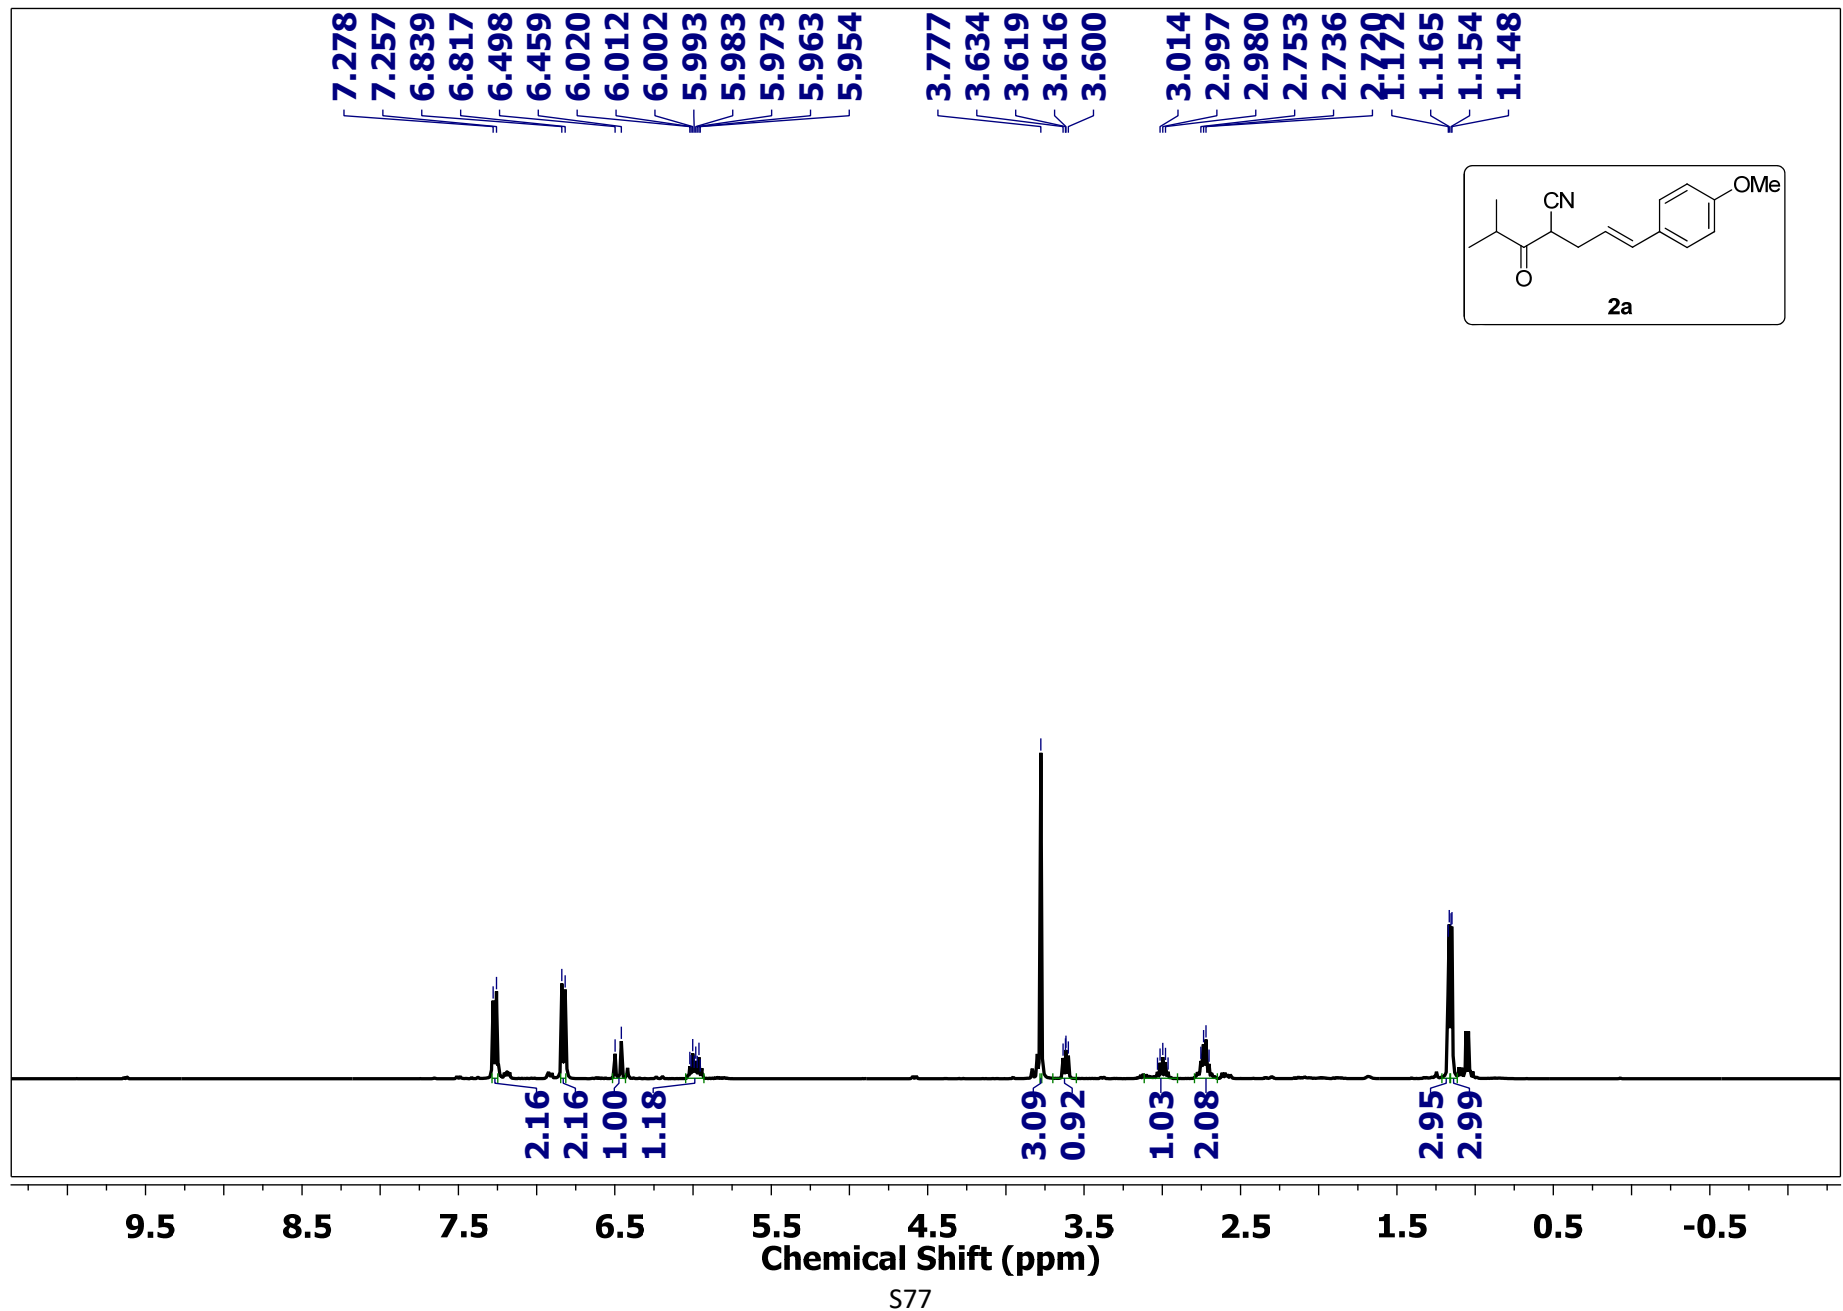

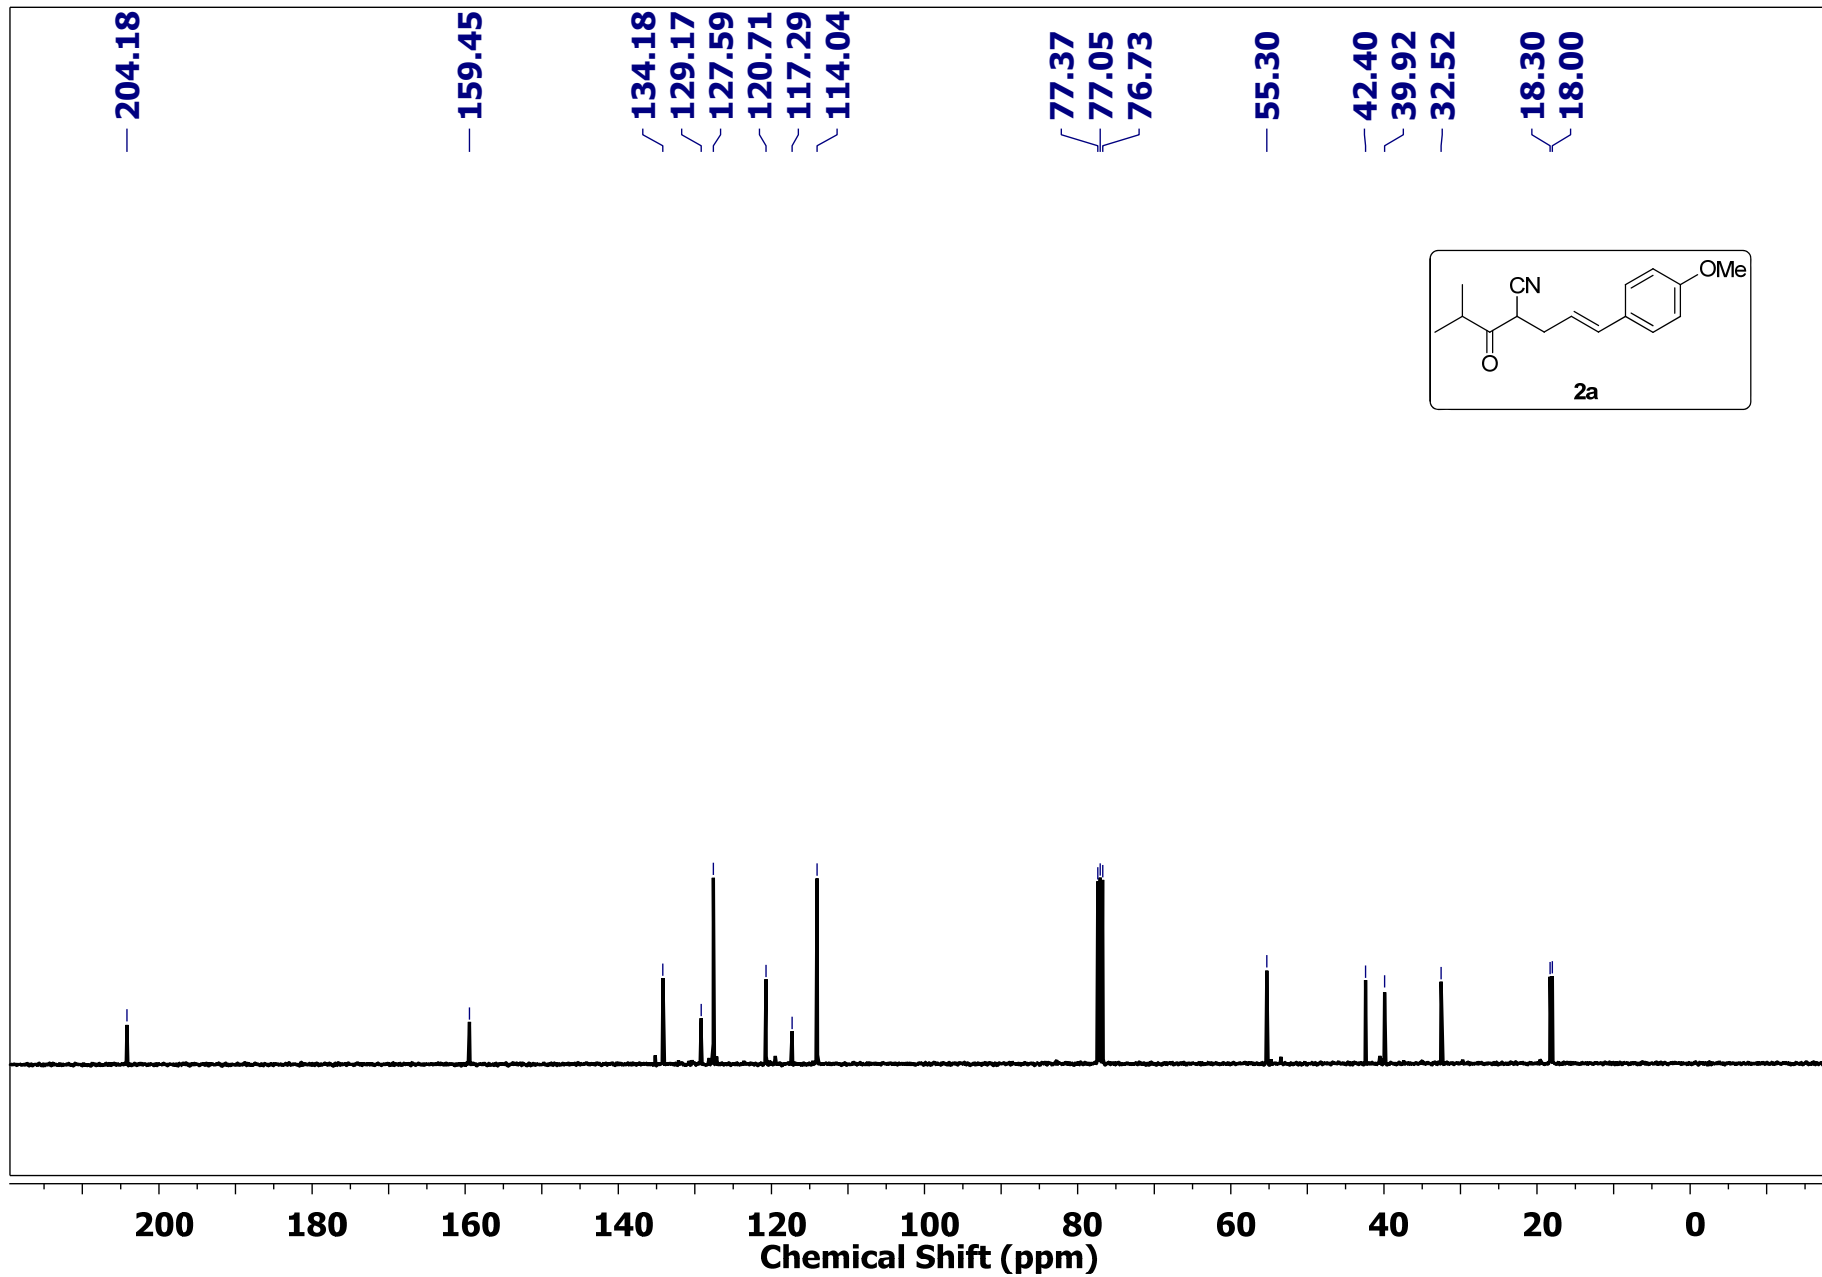

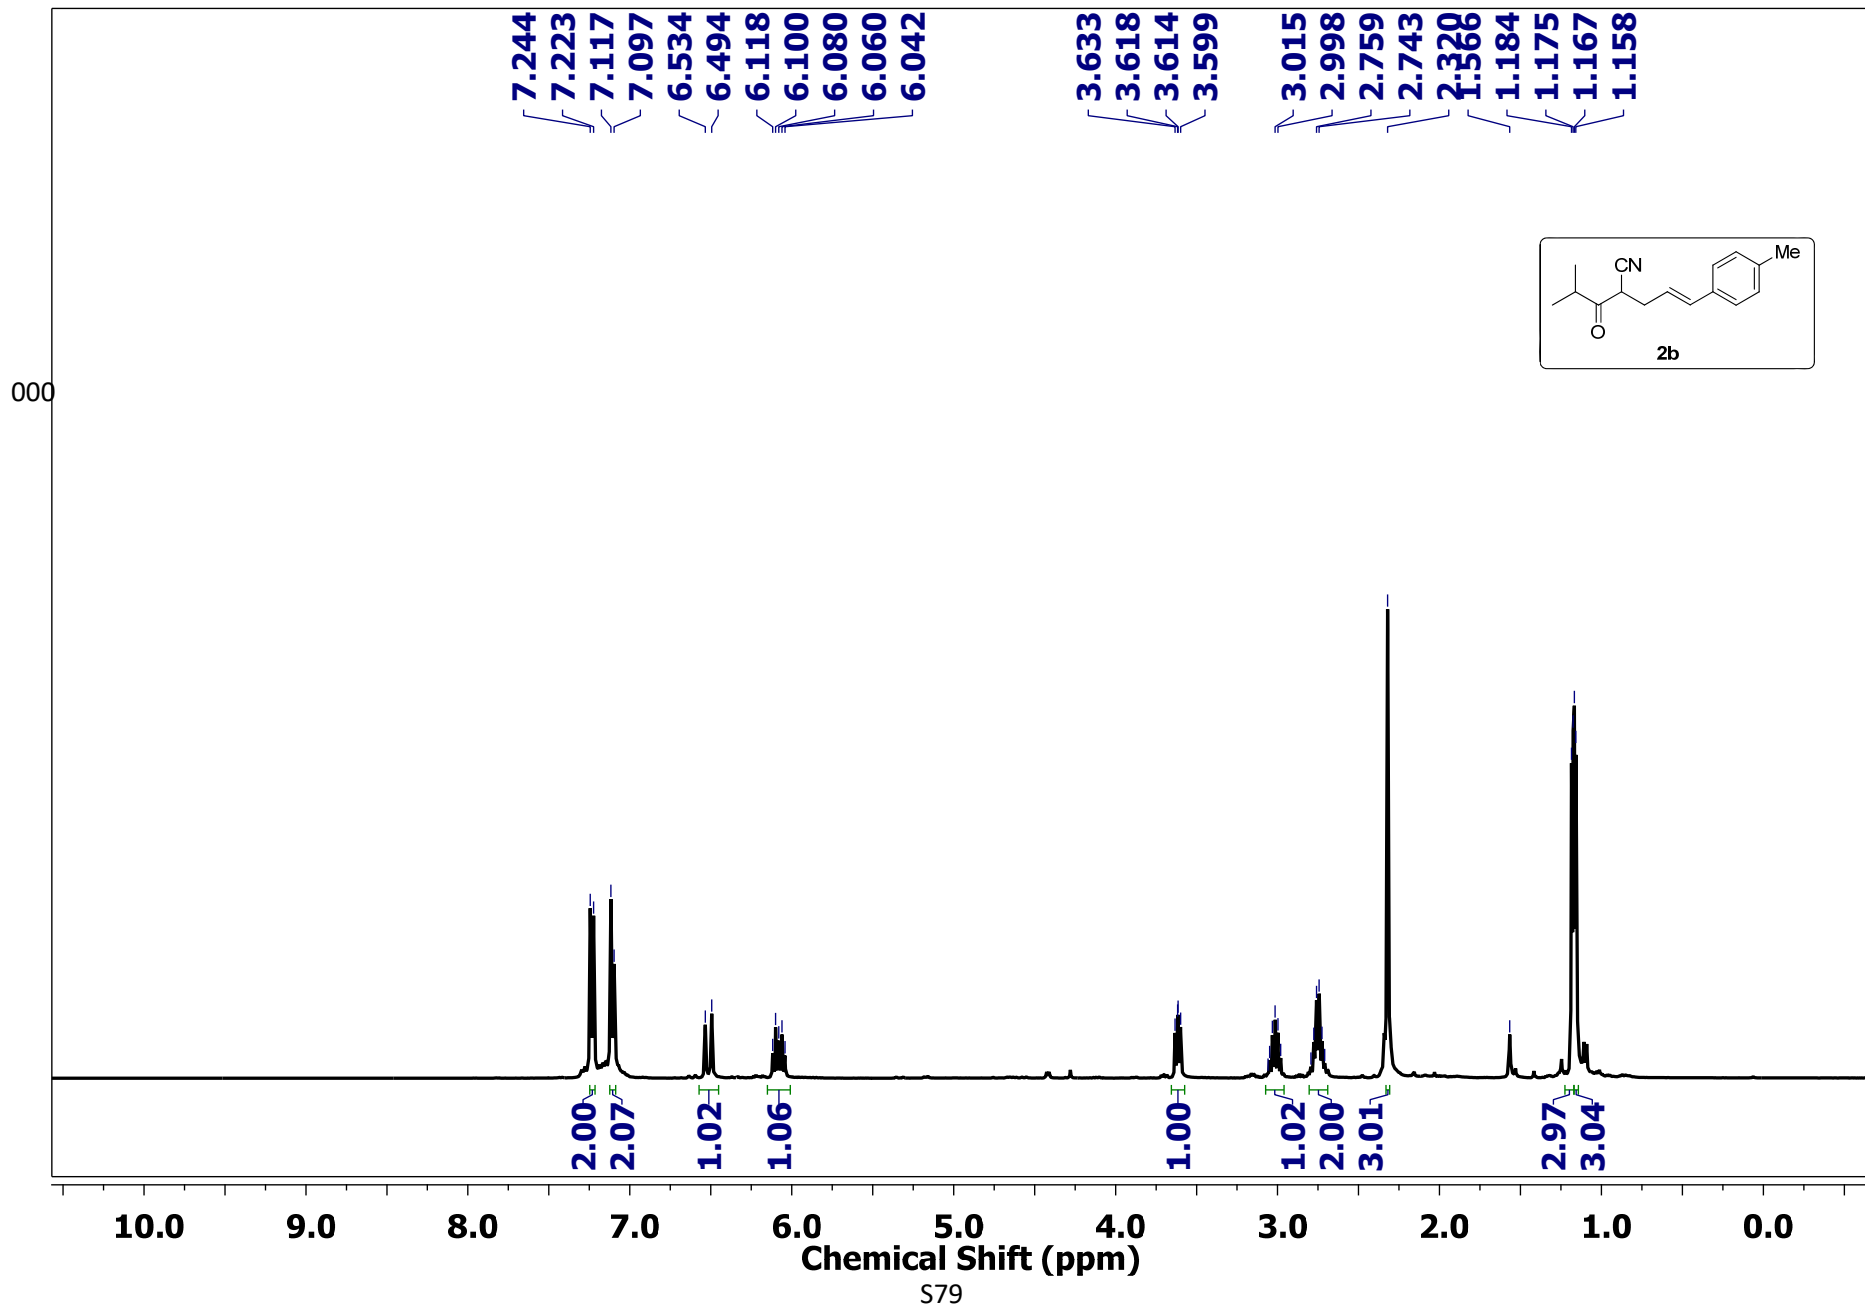

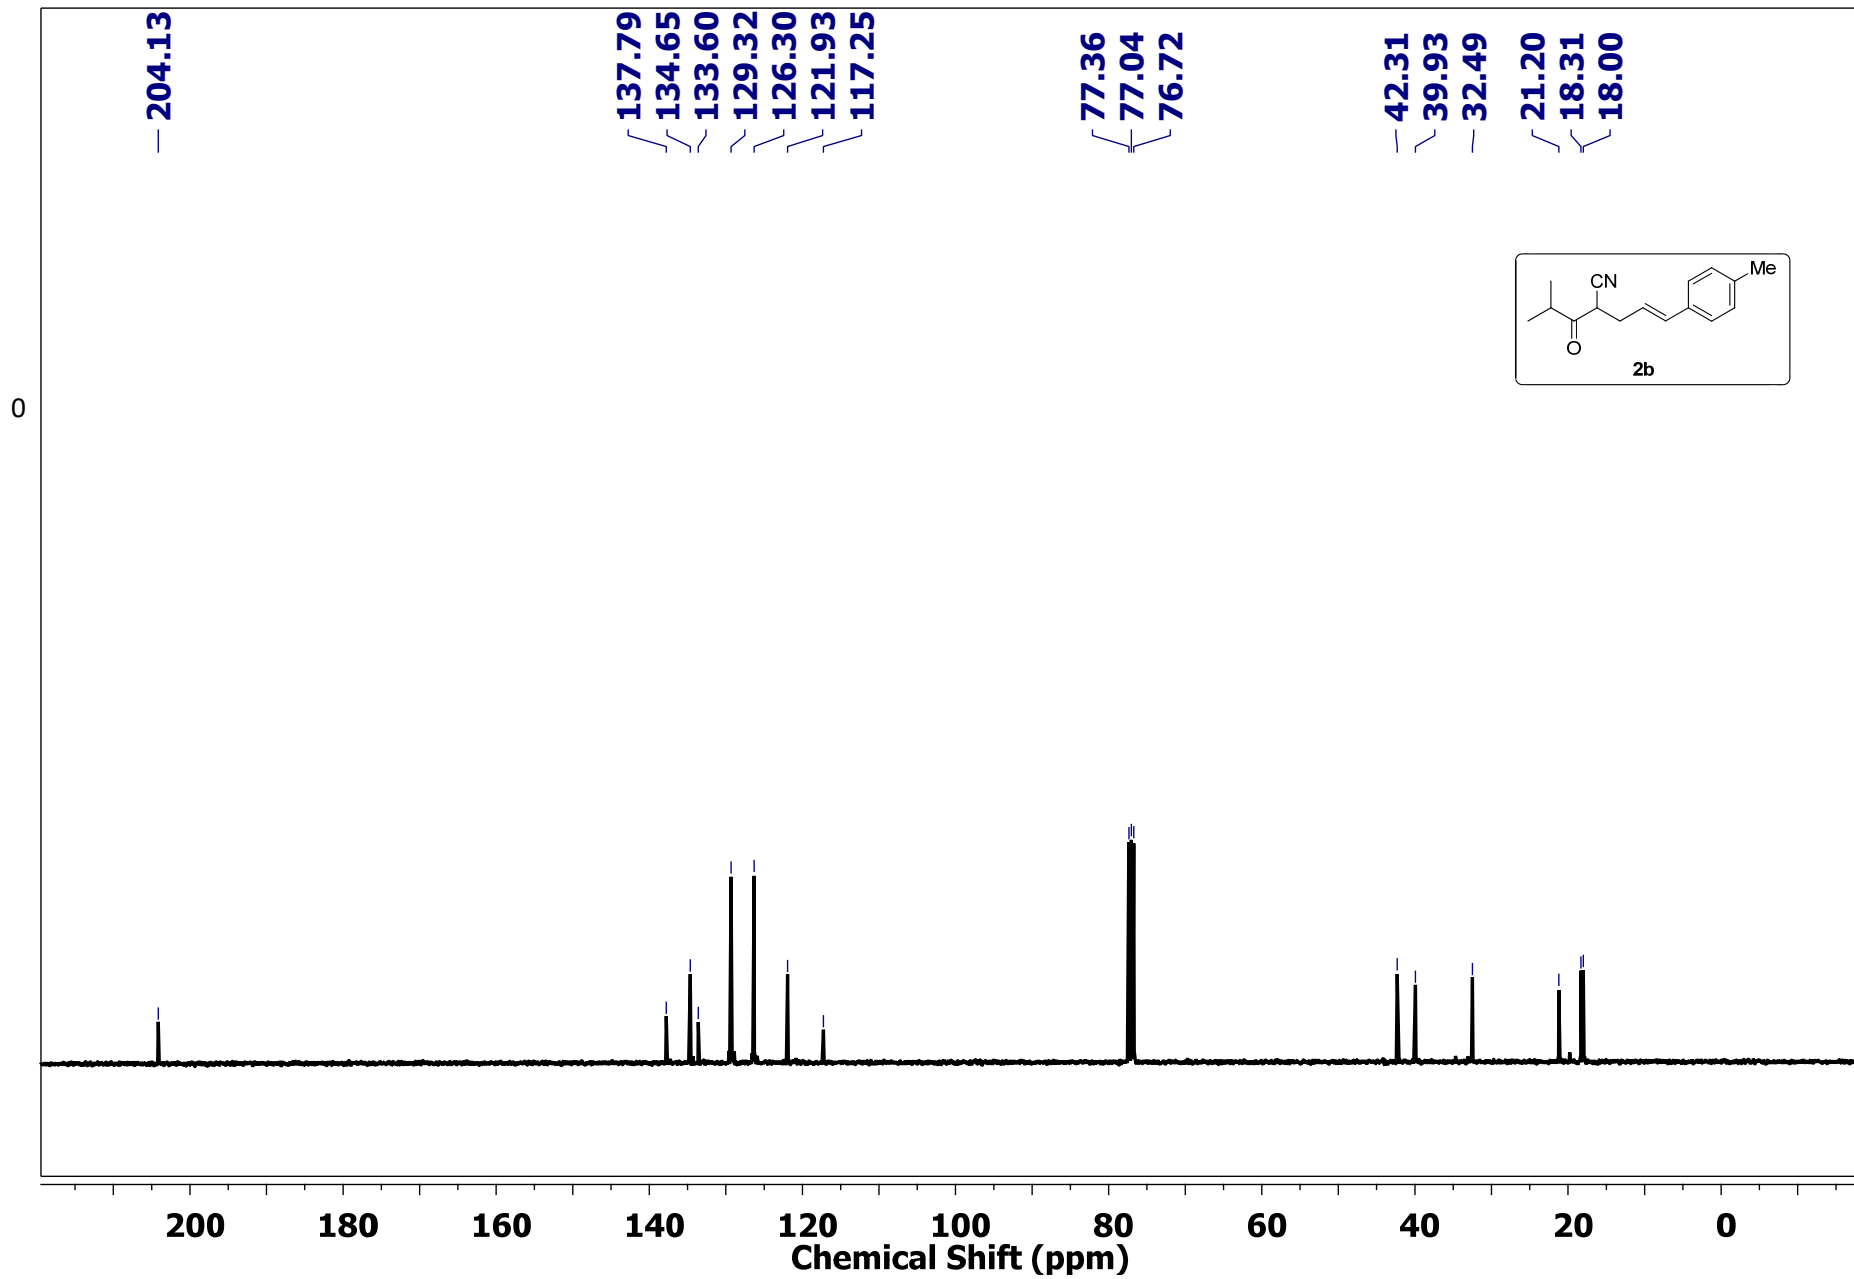



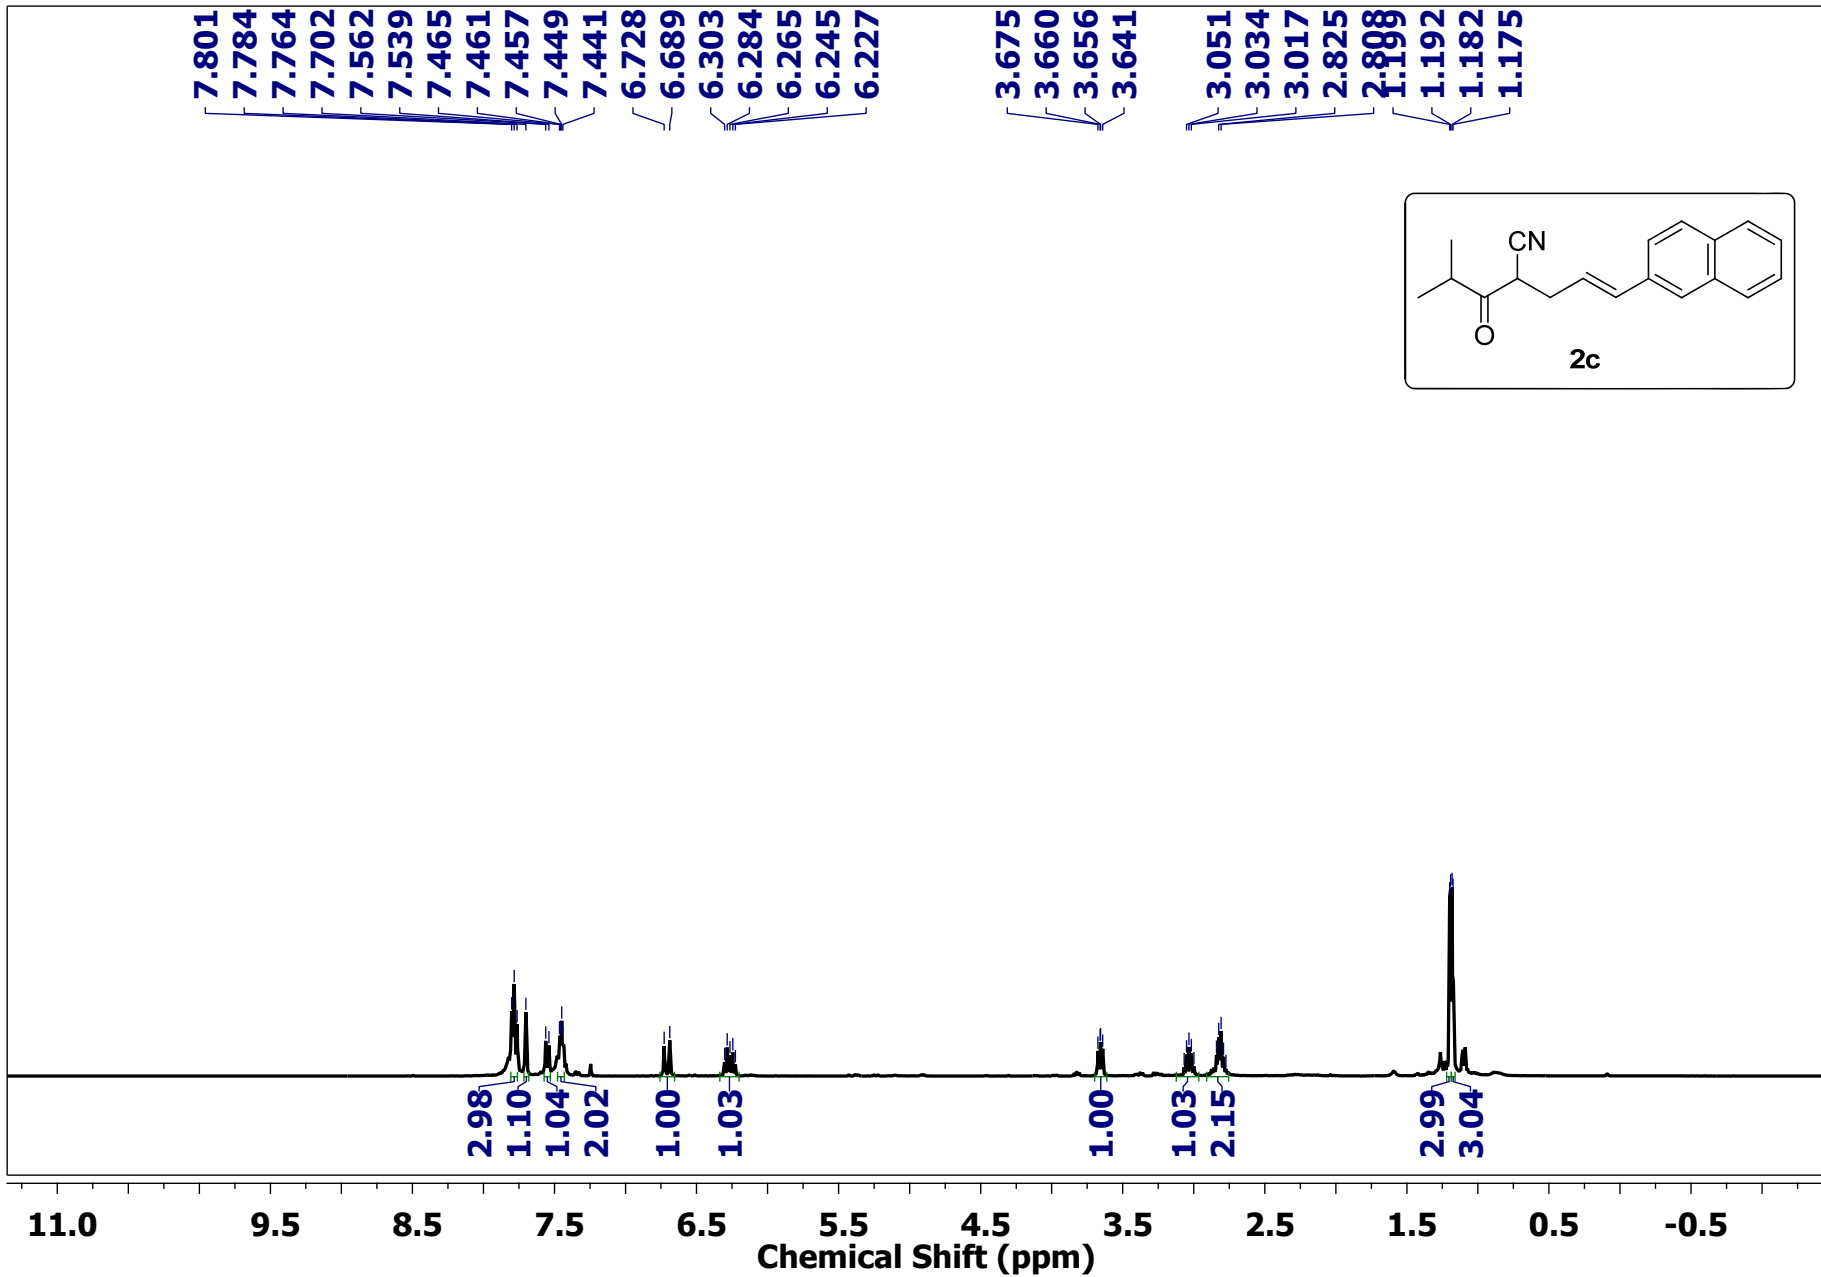

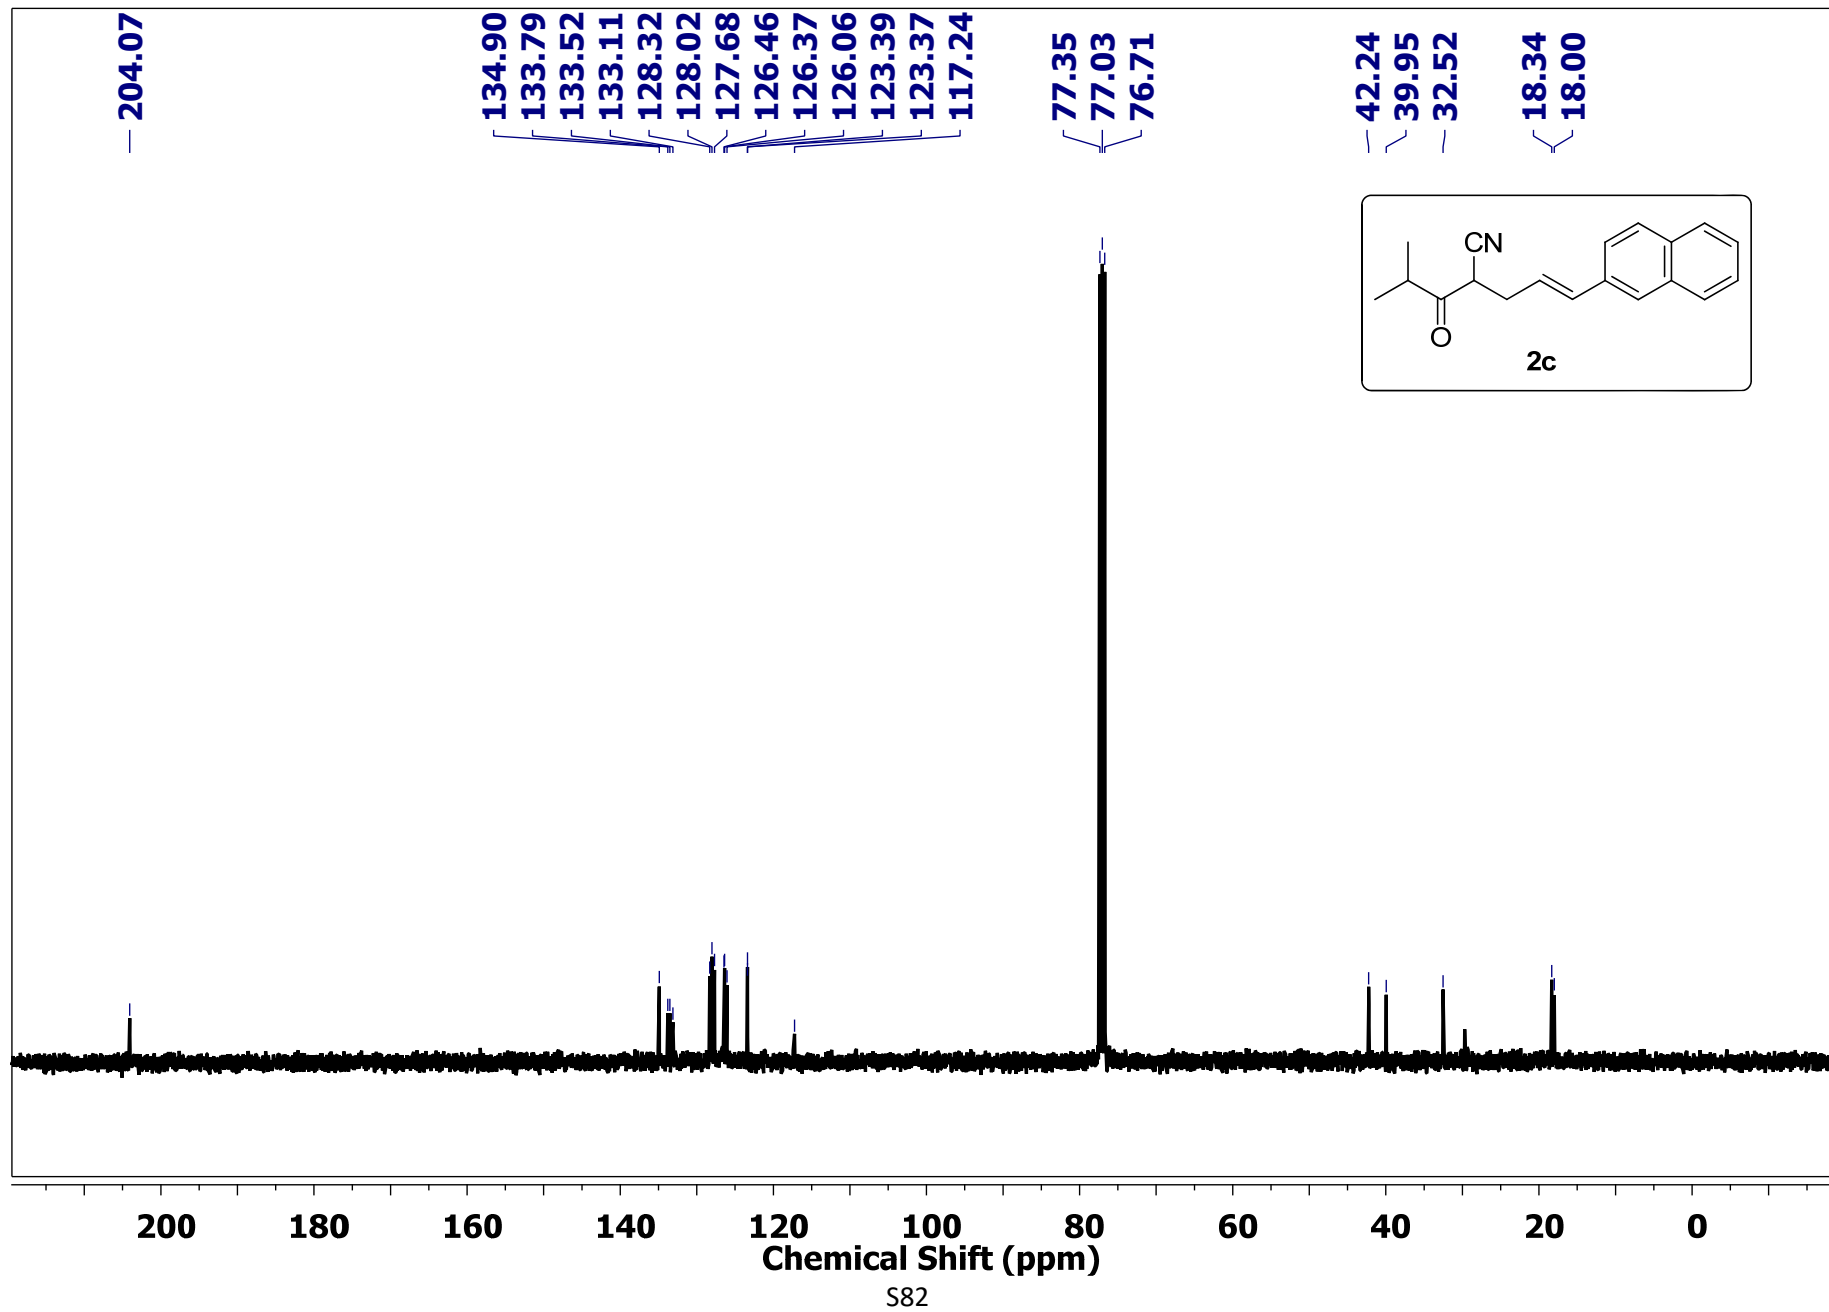

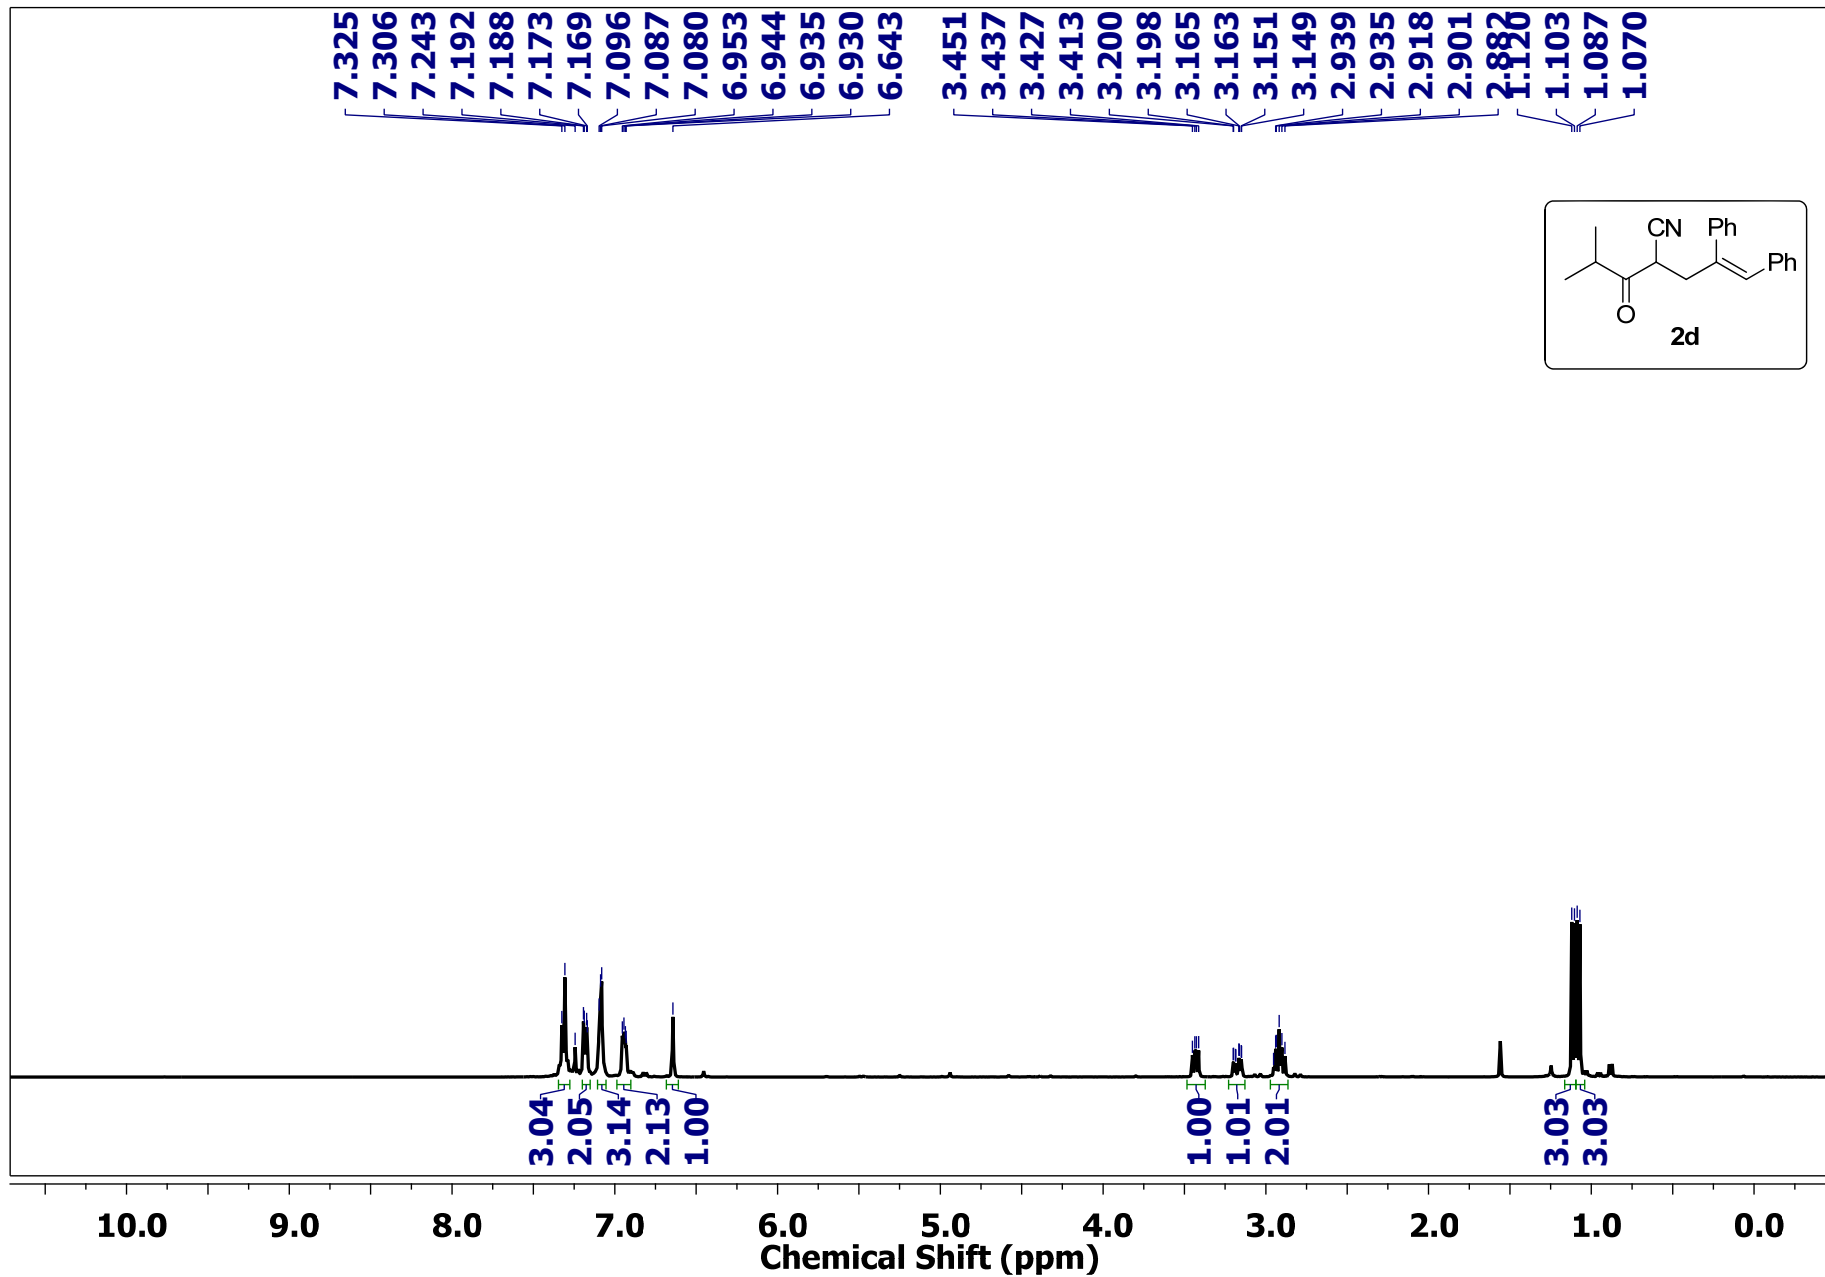

S83

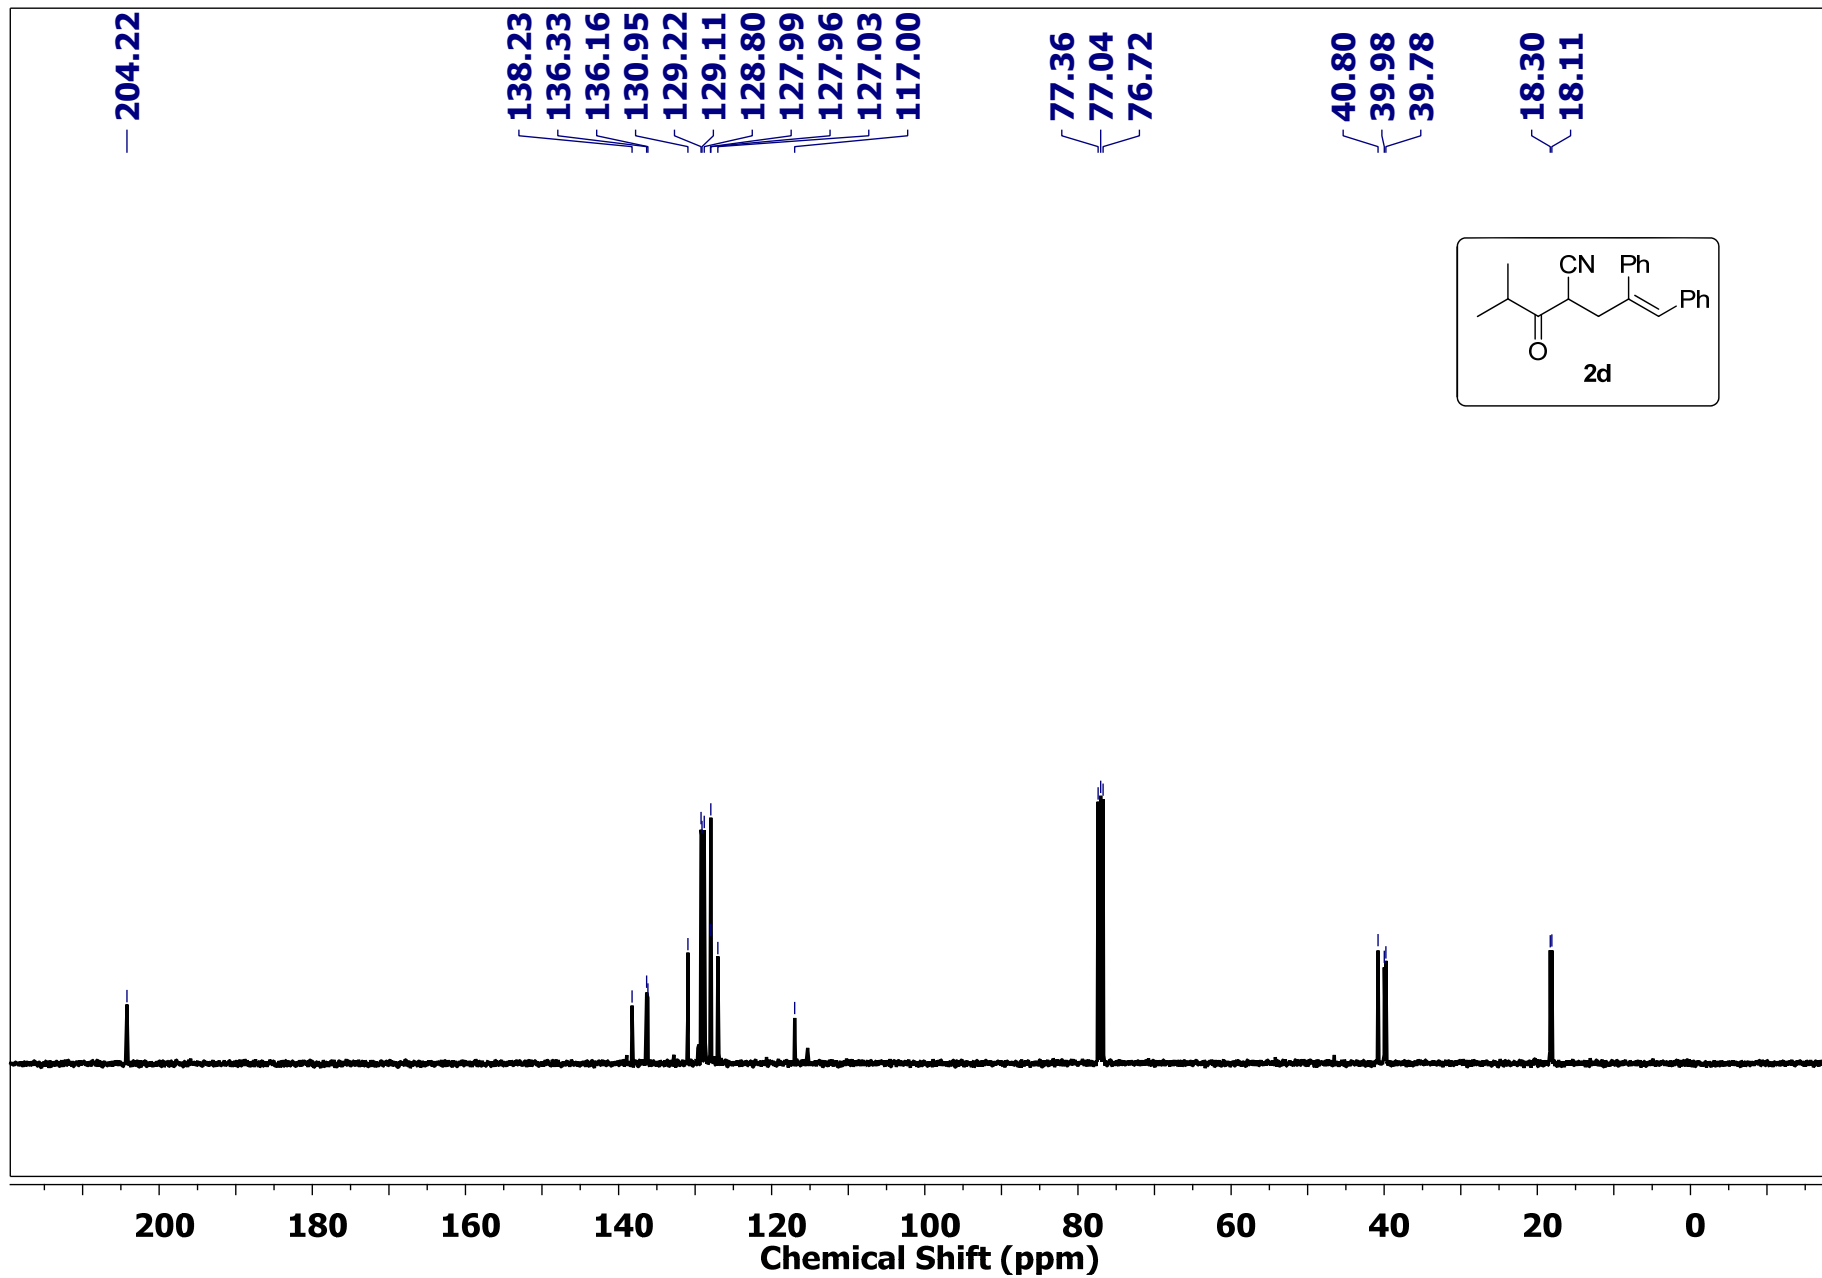

Supplement: c7ob00912g2.pdf [file c7ob00912g2.pdf]
