# Supplementary material for: Nitrile-assisted oxidation over oxidative-annulation: Pd-catalyzed α,β-dehydrogenation of α-cinnamyl β-keto nitriles
Source: Royal Society of Chemistry journal article supplement (doi:10.1039/c7ob00912g), 2017-01-01
Supplement: c7ob00912g1.pdf [file c7ob00912g1.pdf]

**Supporting Information I**

**Nitrile-Assisted Oxidation over Oxidative-Annulation: Palladium-Catalyzed Oxidation of  $\alpha$ -Cinnamyl  $\beta$ -Keto Nitriles**

Rajender Nallagonda, Reddy Rajasekhar Reddy and Prasanta Ghorai\*

Department of Chemistry, Indian Institute of Science Education and Research Bhopal,  
Bhouri, Bhopal-462066, India. *E-mail:* [pghorai@iiserb.ac.in](mailto:pghorai@iiserb.ac.in)

| <b>Contents:</b>                                                                       | <b>Page:</b> |
|----------------------------------------------------------------------------------------|--------------|
| I Experimental Details and Compound Characterization Data                              | 2-17         |
| 1. General information                                                                 | 2            |
| 2. General procedure for the Palladium catalyzed oxidation                             | 2            |
| 3. Control experiments                                                                 | 3            |
| 4. Characterization of $\alpha,\beta,\gamma,\delta$ -unsaturated keto-nitrile products | 3            |
| 5. Preparation of starting materials                                                   | 9            |
| 6. References                                                                          | 17           |

## **I. Experimental Details and Compound Characterization Data**

### **1. General information**

All reagents and solvents were used as supplied commercially. Commercial Pd(OAc)<sub>2</sub> (98.0% purchased from Sigma-Aldrich) were stored in a desiccator over CaCl<sub>2</sub>. Analytical thin-layer chromatography (TLC) were performed on 0.2 mm coated Science silica gel (EM 60-F254) plates. Visualization was accomplished with UV light (254 nm) and exposure to either ethanolic phosphomolybdic acid (PMA), anisaldehyde or KMnO<sub>4</sub>, CeSO<sub>4</sub> + ammonium phosphomolybdate + 10% H<sub>2</sub>SO<sub>4</sub>, ninhydrine solution followed by heating. Melting points are uncorrected. <sup>1</sup>H NMR spectra were acquired on a 400 MHz or 500 MHz spectrometer and chemical shifts are reported relative to the residual solvent peak. <sup>13</sup>C NMR spectra were acquired on a 100 MHz or 125 MHz spectrometer and chemical shifts are reported in ppm relative to the residual solvent peak. Unless noted, NMR spectra were acquired in CDCl<sub>3</sub>; individual peaks are reported as: multiplicity, integration, coupling constant in Hz. All IR spectra were obtained as neat films with FT-IR and selected absorbance are reported in cm<sup>-1</sup>. Low resolution (LR) and High-resolution (HR) mass spectrometry data were acquired by the Central Instrumentation Facility, Indian Institute of Science Education and Research Bhopal on a MicroTOF-Q-II (quadrupole) Mass Spectrometer using CH<sub>3</sub>CN/MeOH as a solvent.

**2. General procedure for the Palladium catalyzed oxidation:** To a stirred solution of  $\alpha$ -Cinnamyl- $\beta$ -Keto-Nitriles **1/2** (0.12 mmol) in THF (1.0 mL), taken in a round-bottom flask attached to a refluxed condenser, PdCl<sub>2</sub>(CH<sub>3</sub>CN)<sub>2</sub> (5 mol %), PTS (1.0 equivalent) and BQ (1.0 equivalent) was added. The reaction was stirred at 80 °C. After consumption of starting material (followed by TLC analysis), the mixture was cooled to room temperature. The solvent was removed under reduced pressure to provide the crude product **3/5** which was purified by flash chromatography on silica-gel using n-hexane/ethyl-acetate as eluent.

## Supporting Information I

### 3. Control experiments:

Scheme 5:

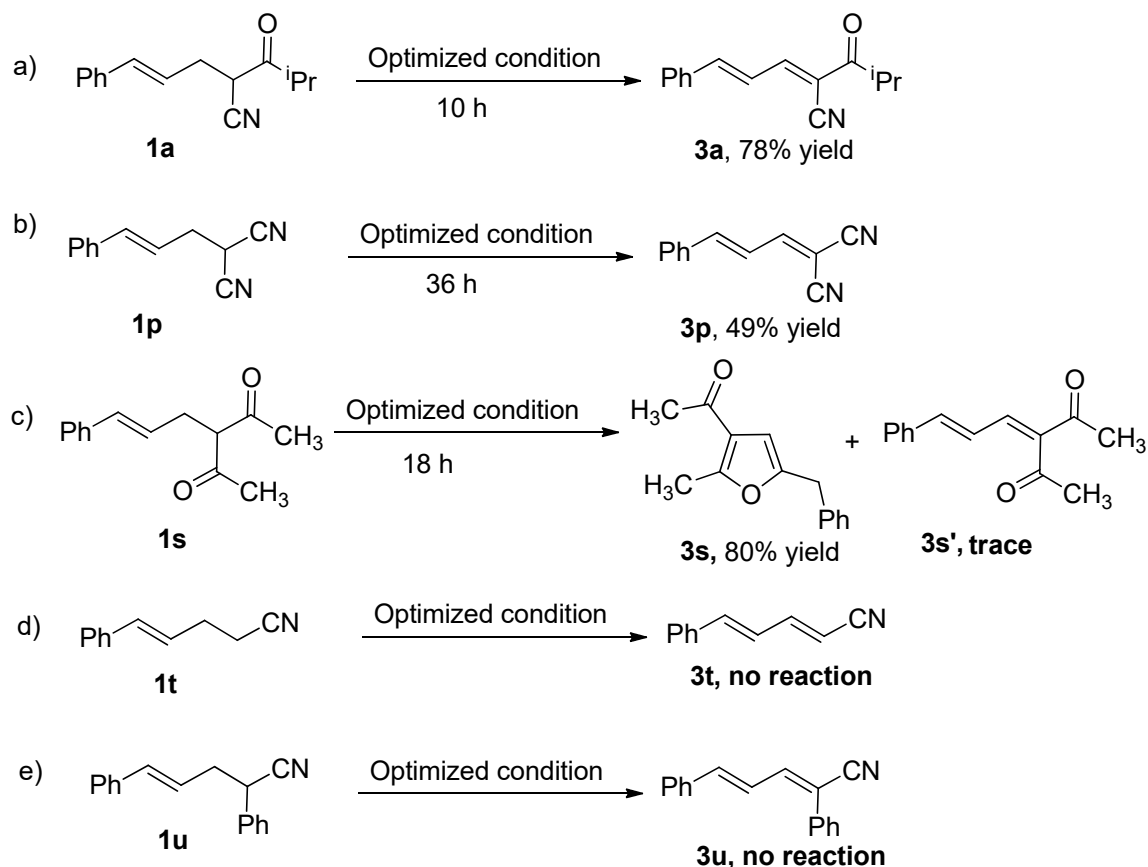

Scheme 6: Reactions with non-cinnamyl substrates

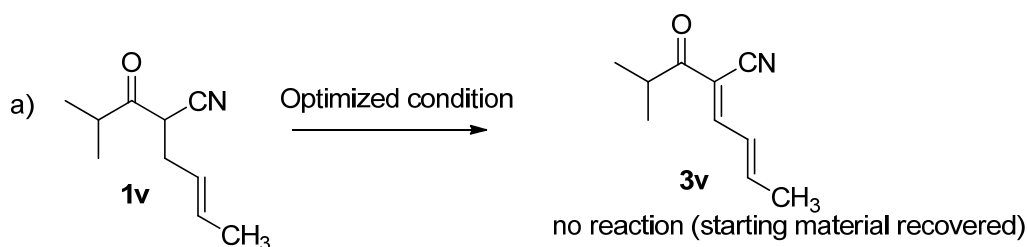

### 4. Characterization of $\alpha$ , $\beta$ , $\gamma$ , $\delta$ -unsaturated keto-nitrile products:

(*2E*, *4E*)-2-isobutyryl-5-phenylpenta-2,4-dienitrile (**3a**): 78% yield;  $R_f = 0.25$  (05:95 = EtOAc/n-Hexane); Yellow solid; **mp** 75-76 °C; IR (**neat**): 3026, 2984, 2928, 2360, 1688, 1630, 1568, 1357, 1161, 754  $\text{cm}^{-1}$ ;  **$^1\text{H}$  NMR (400 MHz,  $\text{CDCl}_3$ )**:  $\delta$ , 7.98 (dd,  $J = 8.4, 2.4$  Hz, 1H), 7.60-7.56 (m, 2H), 7.39-7.43 (3H, m), 7.30 (2H), 3.25 (m, 1H), 1.20 (d,  $J = 6.8$  Hz, 6H);  **$^{13}\text{C}$  NMR (100 MHz,  $\text{CDCl}_3$ )**:  $\delta$ , 197.3, 154.1, 149.8, 134.8, 131.2,

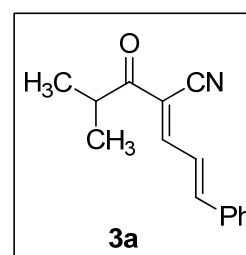

## Supporting Information I

129.1, 128.5, 123.4, 116.3, 110.6, 38.2, 18.3; **HR-MS (ESI,  $m/z$ ):**  $[M + H]^+$  calculated for  $C_{15}H_{16}NO$ : 226.1232; found: 226.1229.

**(2E, 4E)-5-phenyl-2-propionylpenta-2,4-dienitrile (3b):** 80% yield;  $R_f = 0.30$  (10:90 = EtOAc/Hexane); Yellow solid; **mp** 121-122 °C; **IR (neat):** 3026, 2984, 2928, 2886, 2365, 1688, 1630, 1568, 1358, 1269, 1161, 734  $cm^{-1}$ ;  **$^1H$  NMR (400 MHz,  $CDCl_3$ ):**  $\delta$ , 7.94 (d,  $J = 10.4$  Hz, 1H), 7.58 (dd,  $J = 6.0, 2.4$  Hz, 2H), 7.40–7.41 (m, 3H), 7.30–7.24 (m, 2H), 2.84 (q,  $J = 7.2$  Hz, 2H), 1.17 (t,  $J = 7.2$  Hz, 3H);  **$^{13}C$  NMR (100 MHz,  $CDCl_3$ ):**  $\delta$ , 193.9, 153.1, 149.8, 134.8, 131.2, 129.1, 128.5, 123.2, 116.1, 111.1, 34.1, 7.7; **HR-MS (ESI,  $m/z$ ):**  $[M + H]^+$  calculated for  $C_{14}H_{14}NO$ : 212.1075 ; found: 212.1075.

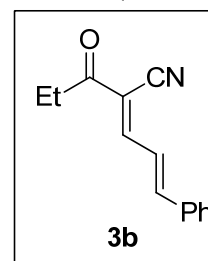

**(2E, 4E)-5-phenyl-2-(2-phenylacetyl)penta-2,4-dienitrile (3c):** 90% yield;  $R_f = 0.35$  (10:90 = EtOAc/n-Hexane); Yellow solid; **mp** 160-161 °C; **IR (neat):** 3057, 2974, 2938, 2365, 1728, 1452, 1348, 1269, 1128, 1119, 760  $cm^{-1}$ ;  **$^1H$  NMR (400 MHz,  $CDCl_3$ ):**  $\delta$ , 7.97 (d,  $J = 10.4$  Hz, 1H), 7.57 (dd,  $J = 6.5, 3.0$  Hz, 2H), 7.41 (dd,  $J = 4.8, 2.0$  Hz, 3H), 7.34-7.36 (m, 2H), 7.28-7.29 (m, 4H), 7.25 (d,  $J = 5.2$  Hz, 1H), 4.10 (s, 2H);  **$^{13}C$  NMR (100 MHz,  $CDCl_3$ ):**  $\delta$ , 190.7, 154.5, 150.4, 134.7, 132.6, 131.4, 129.7, 129.2, 128.8, 128.6, 127.4, 123.3, 116.2, 110.8, 47.2; **HR-MS (ESI,  $m/z$ ):**  $[M + H]^+$  calculated for  $C_{19}H_{15}NO$ : 274.1232; found: 274.1211.

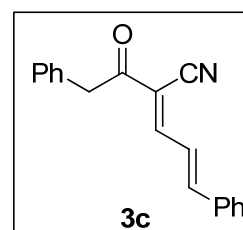

**(2E, 4E)-2-(cyclobutanecarbonyl)-5-phenylpenta-2,4-dienitrile (3d):** 76% yield;  $R_f = 0.35$  (10:90 = EtOAc/n-Hexane); Yellow solid; **mp** 78-79 °C; **IR (neat):** 2984, 2947, 2363, 2216, 1690, 1557, 1447, 1364, 1159  $cm^{-1}$ ;  **$^1H$  NMR (400 MHz,  $CDCl_3$ ):**  $\delta$ , 7.93 (dd,  $J = 9.6, 1.1$  Hz, 1H), 7.57 (dd,  $J = 6.0, 2.4$  Hz, 2H), 7.37-7.43 (m, 3H), 7.25-7.29 (m, 2H), 3.75 (p,  $J = 8.1$  Hz, 1H), 2.34 (m, 4H), 2.08-2.05 (m, 1H), 1.95-1.81 (m, 1H);  **$^{13}C$  NMR (100 MHz,  $CDCl_3$ ):**  $\delta$ , 194.3, 153.5, 149.5, 134.8, 131.2, 129.1, 128.5, 123.3, 115.9, 110.1, 43.9, 24.5, 17.8; **HR-MS (ESI,  $m/z$ ):**  $[M + H]^+$  calculated for  $C_{16}H_{16}NO$ : 238.1232; found: 238.1240.

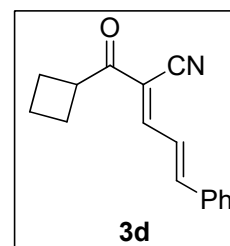

**(2E, 4E)-2-(2-cyclohexylacetyl)-5-phenylpenta-2,4-dienitrile (3e):** 86% yield;  $R_f = 0.35$  (05:95 = EtOAc/n-Hexane); Light yellow solid; **mp** 122-123 °C; **IR (neat):** 2920, 2849, 2340, 2210, 1651, 1558, 1283, 1144  $cm^{-1}$ ;  **$^1H$  NMR (400 MHz,  $CDCl_3$ ):**  $\delta$ , 7.92 (d,  $J = 10.3$  Hz, 1H), 7.58 (dd,  $J =$

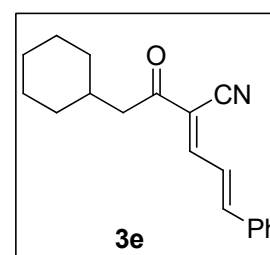

## Supporting Information I

6.6, 2.9 Hz, 2H), 7.46-7.42-7.39 (m, 3H), 7.28-7.25 (m, 2H), 2.66 (d,  $J = 6.8$  Hz, 2H), 1.99-1.81 (m, 1H), 1.68 (m, 5H), 1.34-1.22 (m, 2H), 1.19-1.11 (m, 1H), 1.05-0.93 (m, 2H);  $^{13}\text{C}$  NMR (100 MHz,  $\text{CDCl}_3$ ):  $\delta$ , 193.1, 153.3, 149.8, 134.8, 131.2, 129.1, 128.5, 123.3, 116.3, 111.7, 48.1, 34.3, 33.1, 26.1, 26.0; HR-MS (ESI,  $m/z$ ):  $[\text{M} + \text{H}]^+$  calculated for  $\text{C}_{19}\text{H}_{22}\text{NO}$ : 280.1701; found: 280.1681.

**(E)-3-oxo-2-((E)-3-phenylallylidene)tridec-12-enenitrile (3f)**: 47% yield;  $R_f = 0.35$  (10:90 = EtOAc/Hexane); Light yellow solid; mp 86-87 °C; IR (neat):

2928, 2851, 2372, 1645, 1157, 748  $\text{cm}^{-1}$ ;  $^1\text{H}$  NMR (400 MHz,  $\text{CDCl}_3$ ):  $\delta$ , 7.93 (d,  $J = 10.1$  Hz, 1H), 7.58 (dd,  $J = 7.2, 2.4$  Hz, 2H), 7.42-7.39 (m, 3H), 7.29-7.26 (m, 2H), 5.88-4.84 (3H), 2.80 (t,  $J = 7.3$  Hz, 2H), 2.06-1.95 (m, 2H), 1.65 (2H), 1.37-1.29 (m, 10H);  $^{13}\text{C}$

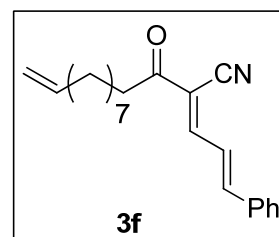

NMR (100 MHz,  $\text{CDCl}_3$ ):  $\delta$ , 193.6, 153.2, 149.8, 139.2, 134.8, 131.2, 129.1, 128.5, 123.3, 116.2, 114.1, 111.3, 40.7, 33.7, 29.3, 29.2, 29.0, 28.9, 23.8; HR-MS (ESI,  $m/z$ ):  $[\text{M} + \text{H}]^+$  calculated for  $\text{C}_{22}\text{H}_{28}\text{NO}$ : 322.2171; found: 322.2176.

**(2E, 4E)-2-benzoyl-5-phenylpenta-2,4-dienenitrile (3g)**:<sup>1</sup> 62% yield;  $R_f = 0.34$  (05:95 = EtOAc/Hexane); Yellow solid; mp 96-97 °C; IR (neat):

3063, 2922, 2860, 1661, 1599, 1452, 1269, 1171, 1076, 743  $\text{cm}^{-1}$ ;  $^1\text{H}$  NMR (400 MHz,  $\text{CDCl}_3$ ):  $\delta$ , 7.93 (d,  $J = 11.3$  Hz, 1H), 7.86-7.83 (m, 2H), 7.64-7.56 (m, 3H), 7.50 (t,  $J = 7.6$  Hz, 2H), 7.46-7.35 (m, 4H), 7.30 (1H);  $^{13}\text{C}$  NMR

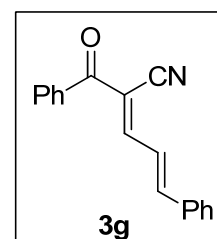

(100 MHz,  $\text{CDCl}_3$ ):  $\delta$ , 188.2, 156.4, 149.6, 136.3, 134.7, 133.2, 131.3, 129.2, 129.0, 128.67, 128.63, 123.6, 116.0, 111.4; LR-MS (ESI,  $m/z$ ):  $[\text{M}]^+$  calculated for  $\text{C}_{18}\text{H}_{13}\text{NO}$ : 259.09; found: 259.09.

**(2E, 4E)-2-(4-methoxybenzoyl)-5-phenylpenta-2,4-dienenitrile (3h)**:<sup>2</sup> 82% yield;  $R_f = 0.30$  (10:90 = EtOAc/n-Hexane); Yellow solid; mp 145-146 °C; IR

(neat): 2849, 2365, 2355, 2203, 1661, 1603, 1541, 1312, 1254, 1171, 1036  $\text{cm}^{-1}$ ;  $^1\text{H}$  NMR (400 MHz,  $\text{CDCl}_3$ ):  $\delta$ , 7.93 (dd,  $J = 8.8, 2.8$  Hz, 3H), 7.59 (dd,  $J = 6.4, 3.6$  Hz, 2H), 7.44-7.40 (m, 3H), 7.38 (d,  $J = 11.3$  Hz, 1H), 7.31-7.23 (1H), 6.97 (d,  $J = 8.8$

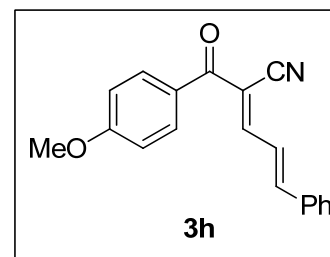

Hz, 2H), 3.88 (s, 3H);  $^{13}\text{C}$  NMR (100 MHz,  $\text{CDCl}_3$ ):  $\delta$ , 186.1, 163.8, 155.8, 148.9, 134.8, 131.6, 131.1, 129.1, 128.8, 128.5, 123.6, 116.4, 113.9, 111.3, 55.5; LR-MS (ESI,  $m/z$ ):  $[\text{M} + \text{H}]^+$  calculated for  $\text{C}_{19}\text{H}_{16}\text{NO}_2$ : 290.1; found: 290.1.

## Supporting Information I

### (2E,4E)-2-(4-fluorobenzoyl)-5-phenylpenta-2,4-dienitrile (3i):

75% yield;  $R_f = 0.43$  (10:90 = EtOAc/n-Hexane); Yellow solid; **mp**

129-130 °C; **IR (neat)**: 3059, 3026, 2920, 2218, 1663, 1595, 1555,

1285, 1229, 1167, 1096  $\text{cm}^{-1}$ ;  **$^1\text{H NMR}$  (400 MHz,  $\text{CDCl}_3$ )**:  $\delta$ , 7.99-

7.90 (m, 3H), 7.61 (dd,  $J = 5.6, 2.0$  Hz, 2H), 7.45-7.40 (m, 3H), 7.38

(d,  $J = 11.0$  Hz, 1H), 7.32 (1H), 7.18 (t,  $J = 8.6$  Hz, 2H);  **$^{13}\text{C NMR}$  (100 MHz,  $\text{CDCl}_3$ )**:  $\delta$ ,

186.3, 165.78 (d,  $J = 255.8$  Hz), 156.5, 149.9, 134.7, 132.56 (d,  $J = 3.1$  Hz), 131.80 (d,  $J =$

9.4 Hz), 131.4, 129.2, 128.6, 123.5 116.1, 115.93 (d,  $J = 22.1$  Hz), 110.8; **HR-MS (ESI,**

$m/z$ ):  $[\text{M} + \text{H}]^+$  calculated for  $\text{C}_{18}\text{H}_{13}\text{FNO}$ : 278.0981; found: 278.0967.

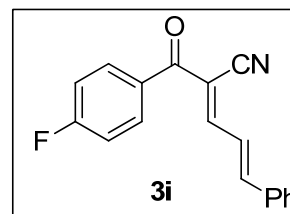

### (2E, 4E)-2-(1-naphthoyl)-5-phenylpenta-2,4-dienitrile (3j): 85 % yield; $R_f = 0.38$ (10:90

= EtOAc/n-Hexane); Yellow solid; **mp** 146-147 °C; **IR (neat)**:

3063, 2916, 2860, 2371, 2214, 1666, 1603, 1462, 1354, 1287, 1186,

754  $\text{cm}^{-1}$ ;  **$^1\text{H NMR}$  (400 MHz,  $\text{CDCl}_3$ )**:  $\delta$ , 8.44 (s, 1H), 8.0-7.89 (m,

5H), 7.63-7.60 (m, 4H), 7.45-7.41 (m, 4H), 7.31 (1H);  **$^{13}\text{C NMR}$**

**(100 MHz,  $\text{CDCl}_3$ )**:  $\delta$ , 188.0, 156.3, 149.5, 135.5, 134.8, 133.5,

132.2, 131.3, 130.7, 129.6, 129.2, 128.8, 128.7, 128.6, 127.8, 127.1, 124.7, 123.6, 116.1,

111.5; **HR-MS (ESI,  $m/z$ )**:  $[\text{M} + \text{H}]^+$  calculated for  $\text{C}_{22}\text{H}_{16}\text{NO}$ : 310.1232; found: 310.1238.

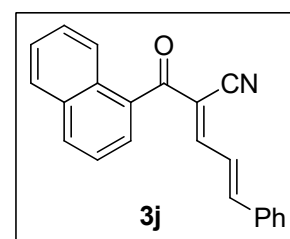

### (2E, 4E)-5-phenyl-2-(thiophene-2-carbonyl)penta-2,4-dienitrile (3k): 66% yield; $R_f =$

0.25 (05:95 = EtOAc/n-Hexane); Yellow solid; **mp** 116-117 °C; **IR (neat)**: 2988, 2926, 2315,

1651, 1543, 1416, 1261, 1175  $\text{cm}^{-1}$ ;  **$^1\text{H NMR}$  (400 MHz,  $\text{CDCl}_3$ )**:  $\delta$ ,

8.35 – 8.28 (m, 1H), 8.21 (s, 1H), 7.82–7.76 (m, 1H), 7.66 (dd,  $J = 6.6,$

3.0 Hz, 2H), 7.47 (dd,  $J = 6.6, 3.0$  Hz, 3H), 7.42 (d,  $J = 4.9$  Hz, 2H),

7.26 – 7.21 (m, 1H);  **$^{13}\text{C NMR}$  (100 MHz,  $\text{CDCl}_3$ )**:  $\delta$ , 177.2, 156.6,

150.0, 142.5, 135.5, 134.8, 134.1, 131.3, 129.2, 128.6, 126.9, 123.5,

116.7, 109.3; **HR-MS (ESI,  $m/z$ )**:  $[\text{M} + \text{H}]^+$  calculated for  $\text{C}_{16}\text{H}_{12}\text{NOS}$ : 266.0640; found:

266.0609.

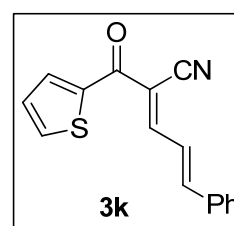

### (2E, 4E)-2-(furan-2-carbonyl)-5-phenylpenta-2,4-dienitrile (3l): 67% yield; $R_f = 0.23$

(10:90 = EtOAc/n-Hexane); Yellow solid; **mp** 184-185 °C; **IR (neat)**:

3121, 2359, 2058, 1645, 1290  $\text{cm}^{-1}$ ;  **$^1\text{H NMR}$  (400 MHz,  $\text{CDCl}_3$ )**:  $\delta$ ,

8.24 (dd,  $J = 8.8, 0.8$  Hz, 1H), 7.73-7.71 (m, 2H), 7.61 (dd,  $J = 6.0, 2.4$

Hz, 2H), 7.47-7.37 (m, 5H), 6.62 (dd,  $J = 3.2, 2.0$  Hz, 1H);  **$^{13}\text{C NMR}$**

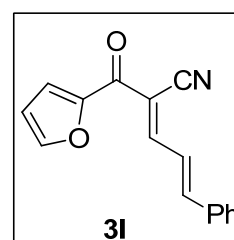

## Supporting Information I

(100 MHz, CDCl<sub>3</sub>):  $\delta$ , 172.4, 156.5, 151.0, 150.1, 147.8, 134.8, 131.4, 129.2, 128.7, 123.5, 120.9, 116.2, 112.7, 108.8; **HR-MS (ESI,  $m/z$ ):**  $[M + H]^+$  calculated for C<sub>16</sub>H<sub>12</sub>NO<sub>2</sub>: 250.0868; found: 250.0854.

**(2E, 4E)-6-(4-methoxyphenyl)-3-oxo-2-((E)-3-phenylallylidene)hex-4-enenitrile (3m):**

89% yield; R<sub>f</sub> = 0.30 (20:80 = EtOAc/Hexane); Yellow solid; **mp** 155-156 °C; **IR (neat):** 2924, 2843, 1665, 1589, 1512, 1292, 1258, 1158, 1027, 824, 752 cm<sup>-1</sup>; **<sup>1</sup>H NMR (400 MHz, CDCl<sub>3</sub>):**  $\delta$ , 8.10 (dd,  $J$  = 7.2, 3.6 Hz, 1H), 7.85 (d,  $J$  = 15.6 Hz, 1H), 7.61 (d,  $J$  = 8.8 Hz, 4H), 7.45-7.37 (m, 3H), 7.35 (d,  $J$  = 3.6 Hz, 1H), 7.32-7.30 (m,

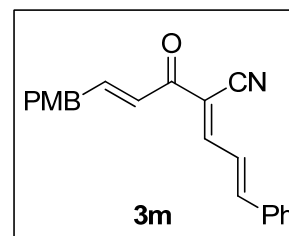

2H), 6.93 (d,  $J$  = 8.8 Hz, 2H), 3.85 (s, 3H); **<sup>13</sup>C NMR (100 MHz, CDCl<sub>3</sub>):**  $\delta$ , 181.7, 162.4, 154.0, 149.5, 146.4, 134.9, 131.2, 130.9, 129.1, 128.5, 127.0, 123.7, 118.7, 116.6, 114.5, 112.3, 55.4; **HR-MS (ESI,  $m/z$ ):**  $[M + Na]^+$  calculated for C<sub>21</sub>H<sub>17</sub>NNaO<sub>2</sub>: 338.1157; found; 338.1176.

**(2E, 4E)-2-((Z)-3-hydroxy-3-phenylacryloyl)-5-phenylpenta-2,4-dienenitrile (3n):** 75%

yield; R<sub>f</sub> = 0.40 (10:95 = EtOAc/Hexane); Yellow solid; **mp** 201-202 °C; **IR (neat):** 2930, 2852, 1596, 1518, 1458, 1313, 1265, 1162, 1053, 983, 755, 682 cm<sup>-1</sup>; **<sup>1</sup>H NMR (400 MHz, CDCl<sub>3</sub>):**  $\delta$ , 8.05 (d,  $J$  = 10.8 Hz, 1H), 7.97 (d,  $J$  = 7.2 Hz, 2H), 7.62-7.54 (m, 3H), 7.48 (t,  $J$  = 7.5 Hz, 2H), 7.44-7.38 (m, 3H), 7.34 (d,  $J$  = 10.8 Hz, 1H), 7.28 (1H), 7.24 (s, 1H), 6.73 (s,

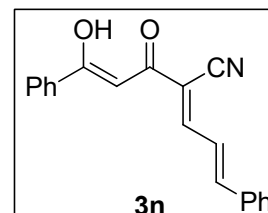

1H); **<sup>13</sup>C NMR (100 MHz, CDCl<sub>3</sub>):**  $\delta$ , 186.9, 177.7, 163.5, 151.1, 148.3, 135.0, 134.7, 133.1, 131.0, 129.1, 128.8, 128.4, 127.5, 123.8, 109.5, 95.5; **DEPT-135 (100 MHz, CDCl<sub>3</sub>):**  $\delta$ , 151.1, 148.3, 133.2, 131.0, 129.1, 128.8, 128.4, 127.5, 123.7, 95.5; **HR-MS (ESI,  $m/z$ ):**  $[M - H]^+$  calculated for C<sub>20</sub>H<sub>14</sub>NO<sub>2</sub>: 300.1030; found: 300.1049.

**(3E, 5E)-ethyl 3-cyano-2-oxo-6-phenylhexa-3,5-dienoate (3o):** 71% yield; R<sub>f</sub> = 0.30

(10:90 = EtOAc/Hexane); Yellow solid; **mp** 80-81°C; **IR (neat):** cm<sup>-1</sup>; **<sup>1</sup>H NMR (400 MHz, CDCl<sub>3</sub>):**  $\delta$ , 8.18 (d,  $J$  = 10.4 Hz, 1H), 7.62 (dd,  $J$  = 7.2, 1.2 Hz, 2H), 7.48-7.38 (m, 5H), 4.42 (q,  $J$  = 7.1 Hz, 2H), 1.41 (t,  $J$  = 7.1 Hz, 3H); **<sup>13</sup>C NMR (100 MHz, CDCl<sub>3</sub>):**  $\delta$ , 179.1, 161.0, 158.3, 152.6, 134.4, 132.1, 129.3, 129.1, 123.6, 113.8, 108.9, 63.1, 13.9; **HR-**

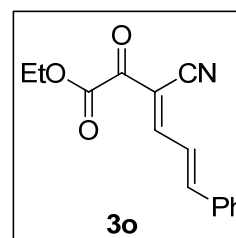

**MS (ESI,  $m/z$ ):**  $[M + H]^+$  calculated for C<sub>15</sub>H<sub>14</sub>NO<sub>3</sub>: 256.0974; found; 256.0969.

## Supporting Information I

**(E)-2-(3-phenylallylidene)malononitrile (3p):**<sup>3</sup> 49 % yield;  $R_f = 0.30$  (05:95 = EtOAc/n-Hexane); Brown solid; **mp** 114-115 °C; **IR (neat):** 3007, 2658, 2237, 1614, 1564, 1450, 1267, 1179, 980  $\text{cm}^{-1}$ ;  **$^1\text{H NMR}$  (400 MHz,  $\text{CDCl}_3$ ):**  $\delta$ , 7.60 (dd,  $J = 3.6, 1.6$  Hz, 1H), 7.58 (t,  $J = 1.9$  Hz, 2H), 7.46-7.41 (m, 3H), 7.27 (s, 2H);  **$^{13}\text{C NMR}$  (100 MHz,  $\text{CDCl}_3$ ):**  $\delta$ , 160.0, 150.4, 133.9, 132.1, 129.3, 128.9, 122.3, 113.5, 111.6, 83.0; **LR-MS (ESI,  $m/z$ ):**  $[\text{M}]^+$  calculated for  $\text{C}_{12}\text{H}_8\text{N}_2$ : 180.06; found: 180.05.

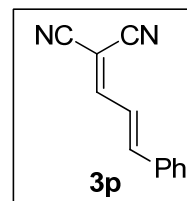

**(2E, 4E)-2-isobutyryl-5-(4-methoxyphenyl)penta-2,4-dienenitrile (5a):** 80% yield;  $R_f = 0.32$  (10:90 = EtOAc/Hexane); Yellow solid; **mp** 88-89 °C; **IR (neat):** 2968, 2922, 2843, 2355, 2208, 1672, 1593, 1547, 1479, 1302, 1260, 1171  $\text{cm}^{-1}$ ;  **$^1\text{H NMR}$  (400 MHz,  $\text{CDCl}_3$ ):**  $\delta$ , 7.96 (d,  $J = 11.5$  Hz, 1H), 7.55 (d,  $J = 8.7$  Hz, 2H), 7.33-7.19 (m, 1H), 7.15 (dd,  $J = 15.2, 11.5$  Hz, 1H), 6.93 (d,  $J = 8.7$  Hz, 2H), 3.86 (s, 3H), 3.25 (dt,  $J = 13.6, 6.8$  Hz, 1H), 1.21 (d,  $J = 6.9$  Hz, 6H);  **$^{13}\text{C NMR}$  (100 MHz,  $\text{CDCl}_3$ ):**  $\delta$ , 197.4, 162.4, 154.7, 149.9, 130.5, 127.7, 121.2, 116.7, 114.7, 108.9, 55.5, 38.1, 18.4; **HR-MS (ESI,  $m/z$ ):**  $[\text{M} + \text{H}]^+$  calculated for  $\text{C}_{16}\text{H}_{18}\text{NO}_2$ : 256.1338; found: 256.1321.

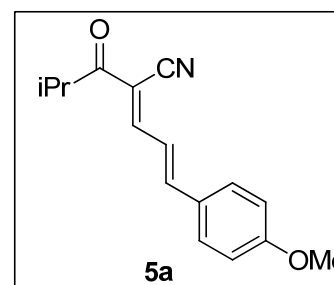

**(2E, 4E)-2-isobutyryl-5-(p-tolyl)penta-2,4-dienenitrile (5b):** 92 % yield;  $R_f = 0.38$  (5:95 = EtOAc/n-Hexane); Yellow solid; **mp** 84-86 °C; **IR (neat):** 3080, 2930, 2359, 2102, 1942, 1645, 1472, 1130  $\text{cm}^{-1}$ ;  **$^1\text{H NMR}$  (400 MHz,  $\text{CDCl}_3$ ):**  $\delta$ , 7.97 (d,  $J = 10.3$  Hz, 1H), 7.48 (d,  $J = 8.1$  Hz, 2H), 7.25 (dd,  $J = 10.3, 2.0$  Hz, 2H), 7.21 (d,  $J = 8.3$  Hz, 2H), 3.32-3.17 (m, 1H), 2.38 (s, 3H), 1.20 (d,  $J = 6.8$  Hz, 6H);  **$^{13}\text{C NMR}$  (100 MHz,  $\text{CDCl}_3$ ):**  $\delta$ , 197.3, 154.4, 150.0, 142.1, 132.2, 129.9, 128.6, 122.5, 116.5, 109.8, 38.1, 21.6, 18.3; **HR-MS (ESI,  $m/z$ ):**  $[\text{M} + \text{Na}]^+$  calculated for  $\text{C}_{16}\text{H}_{17}\text{NNaO}$ : 262.1208; found: 262.1222.

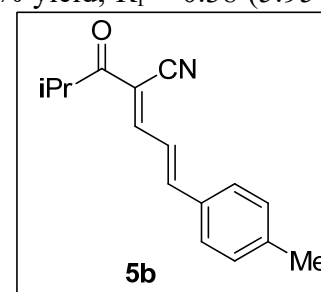

**(2E, 4E)-2-isobutyryl-5-(naphthalen-1-yl)penta-2,4-dienenitrile (5c):** 86% yield;  $R_f = 0.34$  (05:95 = EtOAc/Hexane); Yellow solid; **mp** 107-109 °C; **IR (neat):** 2976, 2212, 1690, 1612, 1466, 1387, 1283, 1141, 1095, 976, 815, 747  $\text{cm}^{-1}$ ;  **$^1\text{H NMR}$  (400 MHz,  $\text{CDCl}_3$ ):**  $\delta$ , 8.02 (d,  $J = 10.8$  Hz, 1H), 7.96 (s, 1H), 7.89-7.80 (m, 3H), 7.72 (dd,  $J = 8.8, 1.2$  Hz, 1H), 7.54-7.51 (m, 2H), 7.43-7.37 (m, 2H), 3.27 (m, 1H), 1.22 (d,  $J = 6.8$  Hz, 6H);  **$^{13}\text{C NMR}$  (100 MHz,  $\text{CDCl}_3$ ):**  $\delta$ , 197.3,

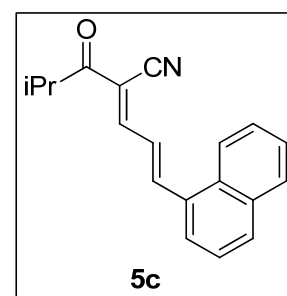



## Supporting Information I

154.1, 149.8, 134.6, 133.2, 132.4, 130.7, 129.0, 128.8, 127.9, 127.9, 127.0, 123.6, 116.5, 110.3, 38.2, 18.3; **HR-MS (ESI,  $m/z$ ):**  $[M + H]^+$  calculated for  $C_{19}H_{18}NO$ : 276.1388; found: 276.1377.

### **(2E,4Z)-2-isobutyryl-4,5-diphenylpenta-2,4-dienitrile (5d):**

84% yield;  $R_f = 0.30$  (05:95 = EtOAc/Hexane); Yellow solid; **mp** 95-97 °C; **IR (neat):** 3058, 2972, 2930, 1693, 1548, 1450, 1385, 1181, 1134, 1093, 980, 757  $cm^{-1}$ ;  **$^1H$  NMR (400 MHz,  $CDCl_3$ ):**  $\delta$ , 8.08 (s, 1H), 7.48 (dd,  $J = 4.8, 1.6$  Hz, 3H), 7.31 (s, 1H), 7.24-7.21 (m, 3H), 7.16 (t,  $J = 8.0$  Hz, 2H), 7.03 (d,  $J = 7.6$  Hz, 2H), 3.31-3.17 (m, 1H),

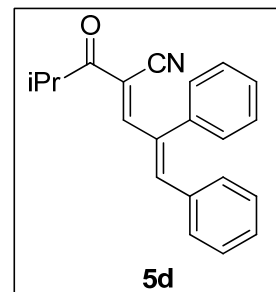

1.14 (d,  $J = 6.8$  Hz, 6H);  **$^{13}C$  NMR (100 MHz,  $CDCl_3$ ):**  $\delta$ , 198.2, 157.3, 147.5, 138.1, 135.4, 134.7, 131.0, 130.1, 129.49, 129.46, 129.2, 128.5, 115.0, 109.0, 37.3, 18.4; **HR-MS (ESI,  $m/z$ ):**  $[M + H]^+$  calculated for  $C_{21}H_{20}NO$ : 302.1545; found: 302.1546.

### **(2E,4Z)-2-isobutyryl-4-(naphthalen-1-yl)-5-phenylpenta-2,4-dienitrile (5e):** 84% yield;

$R_f = 0.23$  (05:95 = EtOAc/Hexane); Yellow solid; **mp** 100-101 °C; **IR (neat):** 2085, 1638, 1548, 1463, 1385, 1181, 1132, 968, 779  $cm^{-1}$ ;  **$^1H$  NMR (400 MHz,  $CDCl_3$ ):**  $\delta$ , 8.25 (s, 1H), 8.03 (d,  $J = 8.4$  Hz, 1H), 7.96 (d,  $J = 8.0$  Hz, 1H), 7.66 (d,  $J = 8.0$  Hz, 1H), 7.59-7.49 (m, 3H), 7.43 (1H), 7.35 (d,  $J = 6.4$  Hz, 1H), 7.17 (t,  $J = 7.6$  Hz, 1H), 7.05 (t,  $J = 8.0$  Hz, 2H), 6.94 (d,  $J = 7.6$  Hz, 2H),

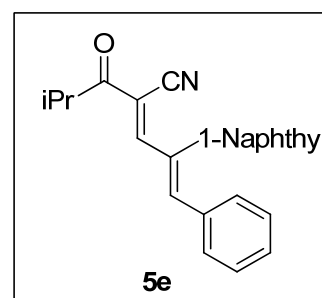

3.16-3.06 (m, 1H), 1.09 (d,  $J = 6.8$  Hz, 3H), 1.04 (d,  $J = 6.8$  Hz, 3H);  **$^{13}C$  NMR (100 MHz,  $CDCl_3$ ):**  $\delta$ , 198.3, 157.3, 149.2, 136.3, 134.5, 133.8, 132.9, 131.8, 130.9, 130.3, 129.9, 128.9, 128.5, 127.4, 126.9, 126.5, 125.9, 124.1, 114.7, 108.8, 37.2, 18.4, 18.2; **HR-MS (ESI,  $m/z$ ):**  $[M + H]^+$  calculated for  $C_{25}H_{22}NO$ : 352.1701; found: 352.1707.

### **(E)-2-(1,3-diphenylallylidene)malononitrile (5f):** 46% yield; $R_f = 0.30$ (05:95 = EtOAc/n-

Hexane); Brown semisolid; **IR (neat):** 3017, 2240, 1619, 1564, 1455, 1290, 1180, 980  $cm^{-1}$ ;  **$^1H$  NMR (400 MHz,  $CDCl_3$ ):**  $\delta$ , 7.62 (1H), 7.55 (d,  $J = 7.5$  Hz, 2H), 7.52-7.50 (m, 2H), 7.42-7.34 (m, 5H), 7.23 (1H), 6.87 (d,  $J = 15.6$  Hz, 1H);  **$^{13}C$  NMR (100 MHz,  $CDCl_3$ ):**  $\delta$ , 171.2, 149.2, 134.3, 133.0, 131.7, 131.2, 129.2, 129.0, 128.9, 128.8, 128.1, 124.5, 113.3, 112.7, 29.7 (grease peak); **HR-MS (ESI,  $m/z$ ):**

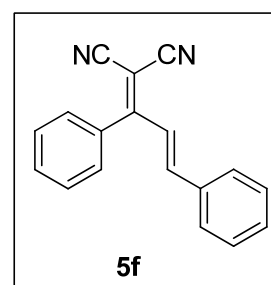

$[M + H]^+$  calculated for  $C_{18}H_{13}N_2$ : 257.1079; found: 257.1050.

## 5. Preparation of starting materials

5.1 Preparation of  $\alpha$ -Cinnamyl- $\beta$ -Keto-Nitriles<sup>5</sup>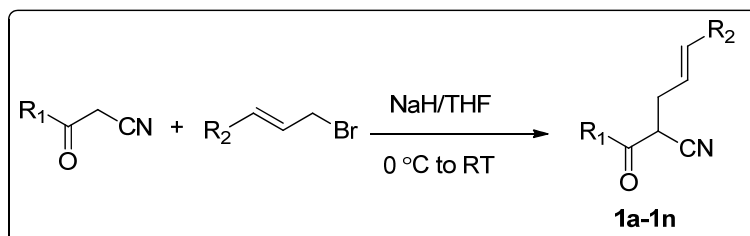

To a solution of NaH (1.2 mmol, 1.2 equiv) in THF (5 mL) at 0 °C was added  $\beta$ -keto nitrile<sup>4</sup> (1.0 mmol, 1.0 equiv) in THF (3 mL) dropwisely, and the mixture was stirred at 0 °C for 1 h. A solution of cinnamyl bromide (1.2 mmol, 1.2 equiv) in THF (3 mL) was added to the solution over 5 mins and the reaction mixture was further stirred for several hours (5-10 hrs) at room temperature. Upon completion as indicated by TLC, the reaction was quenched with saturated  $\text{NH}_4\text{Cl}$  and extracted with ethyl acetate. The combined organic layers were washed with water, brine, and dried over  $\text{Na}_2\text{SO}_4$ . The crude material was purified by column chromatography using hexane - ethyl acetate to afford the corresponding product.

**(E)-2-isobutyryl-5-phenylpent-4-enenitrile (1a):**  $R_f = 0.20$  (5:95 = EtOAc/Hexane); Yellow liquid; **IR (neat):** 2982, 2945, 2263, 1734, 1564, 1462, 1395, 1302, 1045  $\text{cm}^{-1}$ ;  **$^1\text{H}$  NMR (400 MHz,  $\text{CDCl}_3$ ):**  $\delta$ , 7.35-7.27 (m, 4H), 7.26-7.22 (m, 1H), 6.55 (d,  $J = 15.6$  Hz, 1H), 6.19-6.08 (m, 1H), 3.63 (dd,  $J = 7.6, 6.0$  Hz, 1H), 3.03 (m, 1H), 2.76 (m, 2H), 1.18 (d,  $J = 4.0$  Hz, 3H), 1.17 (d,  $J = 3.9$  Hz, 3H);  **$^{13}\text{C}$  NMR (100 MHz,  $\text{CDCl}_3$ ):**  $\delta$ , 204.0, 136.3, 134.8, 128.6, 127.9, 126.4, 123.0, 117.2, 42.2, 39.9, 32.4, 18.3, 18.0; **LR-MS (ESI,  $m/z$ ):**  $[\text{M}]^+$  calculated for  $\text{C}_{15}\text{H}_{17}\text{NO}$ : 227.13; found: 227.15.

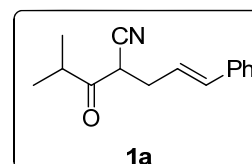

**(E)-5-phenyl-2-propionylpent-4-enenitrile (1b):**  $R_f = 0.25$  (10:90 = EtOAc/Hexane); Colourless liquid; **IR (neat):** 3057, 2990, 2938, 2365, 2245, 1740, 1599, 1452, 1342, 1265, 1119, 739  $\text{cm}^{-1}$ ;  **$^1\text{H}$  NMR (400 MHz,  $\text{CDCl}_3$ ):**  $\delta$ , 7.35-7.27 (m, 4H), 7.25 (1H), 6.55 (d,  $J = 15.6$  Hz, 1H), 6.22-6.03 (m, 1H), 3.51 (dd,  $J = 7.6, 5.9$  Hz, 1H), 2.79-2.70

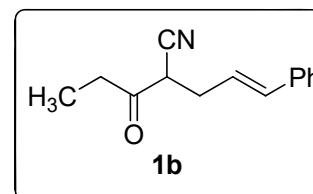

## Supporting Information I

(m, 4H), 1.11 (t,  $J = 7.2$  Hz, 3H);  $^{13}\text{C}$  NMR (100 MHz,  $\text{CDCl}_3$ ): 200.9, 136.3, 134.8, 128.6, 127.9, 126.4, 122.8, 117.2, 43.8, 35.0, 32.4, 7.4; HR-MS (ESI,  $m/z$ ):  $[\text{M} - \text{H}]^+$  calculated for  $\text{C}_{14}\text{H}_{14}\text{NO}$ : 212.1081; found: 212.1096.

**(E)-5-phenyl-2-(2-phenylacetyl)pent-4-enitrile (1c):**  $R_f = 0.31$  (10:90 = EtOAc/Hexane);

Yellow liquid; IR (neat): 3061, 3036, 2936, 2853, 2500, 2253, 2214, 1699, 1450, 1265, 1078, 1026  $\text{cm}^{-1}$ ;  $^1\text{H}$  NMR (400 MHz,  $\text{CDCl}_3$ ):  $\delta$ , 7.39-7.26 (m, 7H), 7.23-7.20 (m, 3H), 6.50 (d,  $J = 15.6$  Hz, 1H), 6.15-6.00 (m, 1H), 3.98 (d,  $J = 3.6$  Hz, 2H), 3.60 (dd,  $J =$

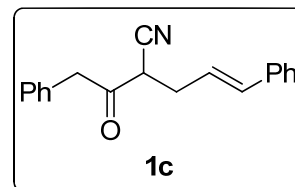

7.4, 6.1 Hz, 1H), 2.73 (m, 2H);  $^{13}\text{C}$  NMR (100 MHz,  $\text{CDCl}_3$ ):  $\delta$ , 197.7, 136.2, 134.9, 131.8, 129.6, 129.0, 128.6, 127.9, 127.8, 126.4, 122.6, 116.9, 48.3, 42.9, 32.2; LR-MS (ESI,  $m/z$ ):  $[\text{M} + \text{H}]^+$  calculated for  $\text{C}_{19}\text{H}_{18}\text{NO}$ : 276.13; found: 276.09.

**(E)-2-(cyclobutanecarbonyl)-5-phenylpent-4-enitrile (1d):**  $R_f = 0.25$  (05:95 =

EtOAc/Hexane); Colourless liquid; IR (neat): 2984, 2943, 2870, 2251, 2208, 1724, 1624, 1447, 1348, 1109, 968  $\text{cm}^{-1}$ ;  $^1\text{H}$  NMR (400 MHz,  $\text{CDCl}_3$ ):  $\delta$ , 7.35 (d,  $J = 7.2$  Hz, 2H), 7.30 (t,  $J = 7.4$  Hz, 2H), 7.24 (d,  $J = 7.0$  Hz, 1H), 6.54 (d,  $J = 15.6$  Hz, 1H), 6.16-

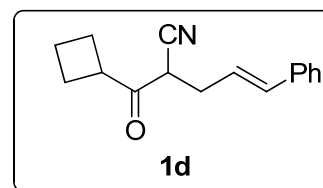

6.07 (m, 1H), 3.65-3.55 (m, 1H), 3.50 (dd,  $J = 7.6, 5.8$  Hz, 1H), 2.75-2.70 (m, 2H), 2.34-2.21 (m, 4H), 2.03-1.96 (m, 1H), 1.88-1.79 (m, 1H);  $^{13}\text{C}$  NMR (100 MHz,  $\text{CDCl}_3$ ): 201.2, 136.4, 134.6, 128.6, 127.9, 126.4, 123.1, 117.1, 44.6, 42.0, 32.2, 24.8, 24.7, 17.7; HR-MS (ESI,  $m/z$ ):  $[\text{M} + \text{H}]^+$  calculated for  $\text{C}_{16}\text{H}_{18}\text{NO}$ : 240.1388; found: 240.1372.

**(E)-2-(2-cyclohexylacetyl)-5-phenylpent-4-enitrile (1e):**  $R_f = 0.30$  (05:95 =

EtOAc/Hexane); Light yellow liquid; IR (neat): 2928, 2860, 2671, 2208, 1786, 1719, 1645, 1495, 1447, 1265, 1161  $\text{cm}^{-1}$ ;  $^1\text{H}$  NMR (400 MHz,  $\text{CDCl}_3$ ):  $\delta$ , 7.35-7.28 (m, 4H), 7.24 (d,  $J = 7.0$  Hz,

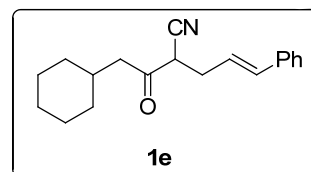

1H), 6.55 (d,  $J = 15.6$  Hz, 1H), 6.19- 6.08 (m, 1H), 3.47 (dd,  $J = 7.6, 6.0$  Hz, 1H), 2.78-2.69 (m, 2H), 2.56 (dd,  $J = 6.7, 2.7$  Hz, 2H), 1.89-1.84 (m, 1H), 1.67 (5H), 1.24 (m, 2H), 1.19-1.06 (m, 1H), 1.02-0.87 (m, 2H);  $^{13}\text{C}$  NMR (100 MHz,  $\text{CDCl}_3$ ):  $\delta$ , 199.9, 136.3, 134.8, 128.6, 127.9, 126.4, 122.8, 117.2, 49.0, 44.4, 33.4, 33.0, 32.9, 32.2, 26.0, 25.9, 25.9; HR-MS (ESI,  $m/z$ ):  $[\text{M} + \text{H}]^+$  calculated for  $\text{C}_{19}\text{H}_{24}\text{NO}$ : 282.1858; found: 282.1870.

## Supporting Information I

**2-cinnamyl-3-oxotridec-12-enenitrile (1f):**  $R_f = 0.30$  (05:95

= EtOAc/Hexane); Light yellow liquid; **IR (neat):** 3102, 2889, 2673, 2212, 1790, 1719, 1655, 1495, 1477, 1278, 1161  $\text{cm}^{-1}$ ;  **$^1\text{H}$  NMR (400 MHz,  $\text{CDCl}_3$ ):**  $\delta$ , 7.36-7.28 (m, 5H),

6.55 (d,  $J = 15.7$  Hz, 1H), 6.18–6.08 (m, 1H), 5.79 (m, 1H), 4.95 (ddd,  $J = 13.6, 11.1, 1.3$  Hz, 2H), 3.50 (dd,  $J = 7.5, 5.9$  Hz, 1H), 2.78-2.70 (m, 4H), 2.02 (dd,  $J = 14.3, 6.9$  Hz, 2H), 1.60 (2H), 1.38 – 1.23 (10H);  **$^{13}\text{C}$  NMR (100 MHz,  $\text{CDCl}_3$ ):**  $\delta$ , 200.4, 139.1, 136.6, 134.2, 128.6, 127.7, 126.3, 124.1, 122.8, 114.1, 44.0, 41.6, 35.0, 33.7, 32.3, 32.0, 29.2, 29.0, 28.8, 23.2; **HR-MS (ESI,  $m/z$ ):**  $[\text{M} + \text{H}]^+$  calculated for  $\text{C}_{22}\text{H}_{30}\text{NO}$ : 324.2327; found: 324.2341.

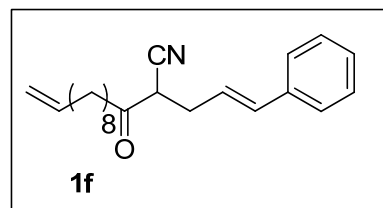

**(E)-2-benzoyl-5-phenylpent-4-enenitrile (1g):**  $R_f = 0.32$  (10:90 = EtOAc/Hexane);

Colourless liquid; **IR (neat):** 3069, 3028, 2926, 2920, 2247, 1697, 1605, 1497, 1450, 1271, 1221, 1076  $\text{cm}^{-1}$ ;  **$^1\text{H}$  NMR (400 MHz,  $\text{CDCl}_3$ ):**  $\delta$ , 8.02 (d,  $J = 7.9$  Hz, 2H), 7.69 (t,  $J = 7.4$  Hz, 1H), 7.56 (t,  $J = 7.6$  Hz, 2H), 7.39–7.31 (m, 4H), 7.28 (d,  $J = 6.2$  Hz, 1H), 6.60 (d,  $J =$

15.8 Hz, 1H), 6.34–6.19 (m, 1H), 4.46 (t,  $J = 7.0$  Hz, 1H), 3.11–2.87 (m, 2H);  **$^{13}\text{C}$  NMR (100 MHz,  $\text{CDCl}_3$ ):**  $\delta$ , 190.0, 136.4, 134.8, 134.6, 134.1, 129.2, 128.8, 128.6, 127.9, 126.4, 123.1, 116.9, 40.1, 33.1; **HR-MS (ESI,  $m/z$ ):**  $[\text{M} - \text{H}]^+$  calculated for  $\text{C}_{18}\text{H}_{14}\text{NO}$ : 260.1081; found: 260.1099.

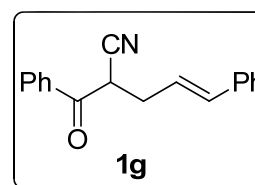

**(E)-2-(4-methoxybenzoyl)-5-phenylpent-4-enenitrile (1h):**  $R_f = 0.28$  (20:80 =

EtOAc/Hexane); Colourless solid; **IR (neat):** 3073, 3026, 2965, 2932, 2843, 2251, 1682, 1603, 1510, 1410, 1317, 1265, 1171  $\text{cm}^{-1}$ ;  **$^1\text{H}$  NMR (400 MHz,  $\text{CDCl}_3$ ):**  $\delta$ , 7.96 (d,  $J = 8.9$  Hz, 2H), 7.37-7.26 (m, 4H), 7.25-7.20 (m, 1H), 6.97 (d,  $J = 8.8$  Hz, 2H),

6.55 (d,  $J = 15.7$  Hz, 1H), 6.28-6.15 (m, 1H), 4.37 (dd,  $J = 7.9, 6.3$  Hz, 1H), 3.87 (s, 3H), 2.92-2.81 (m, 2H);  **$^{13}\text{C}$  NMR (100 MHz,  $\text{CDCl}_3$ ):**  $\delta$ , 188.3, 164.6, 136.4, 134.5, 131.3, 128.6, 127.8, 126.9, 126.4, 123.4, 117.3, 114.4, 55.6, 39.6, 33.1; **HR-MS (ESI,  $m/z$ ):**  $[\text{M} + \text{H}]^+$  calculated for  $\text{C}_{19}\text{H}_{18}\text{NO}_2$ : 292.1338; found: 292.1315.

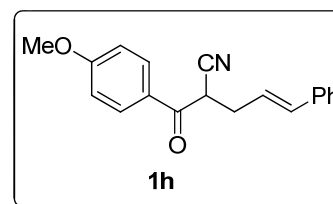

**(E)-2-(4-fluorobenzoyl)-5-phenylpent-4-enenitrile (1i):**  $R_f = 0.40$  (10:90 =

EtOAc/Hexane); Light yellow solid; **IR (neat):** 3078, 3036, 2916, 2604, 2365, 2251, 1703, 1599, 1504, 1410, 1229, 1161

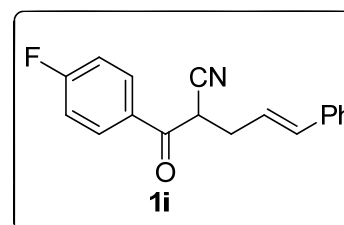

## Supporting Information I

$\text{cm}^{-1}$ ;  $^1\text{H NMR}$  (400 MHz,  $\text{CDCl}_3$ ):  $\delta$ , 8.02 (dd,  $J = 8.9, 5.2$  Hz, 2H), 7.34-7.27 (m, 4H), 7.24 (d,  $J = 6.9$  Hz, 1H), 7.19 (t,  $J = 8.5$  Hz, 2H), 6.56 (d,  $J = 15.6$  Hz, 1H), 6.25-6.11 (m, 1H), 4.38 (dd,  $J = 7.8, 6.2$  Hz, 1H), 3.02-2.79 (m, 2H);  $^{13}\text{C NMR}$  (100 MHz,  $\text{CDCl}_3$ ):  $\delta$ , 188.4, 166.54 (d,  $J = 258.0$  Hz), 136.3, 134.8, 131.67 (d,  $J = 9.7$  Hz), 130.50 (d,  $J = 3.0$  Hz), 128.6, 127.9, 126.4, 122.9, 116.8, 116.49 (d,  $J = 22.2$  Hz), 40.0, 32.9; **HR-MS (ESI,  $m/z$ ):**  $[\text{M} + \text{H}]^+$  calculated for  $\text{C}_{18}\text{H}_{15}\text{FNO}$ : 280.1138; found: 280.1122.

**(E)-2-(2-naphthoyl)-5-phenylpent-4-enenitrile (1j):**  $R_f = 0.18$  (05:95 = EtOAc/Hexane);

Light yellow solid; **IR (neat):** 3063, 3021, 2928, 2849, 2371, 2359, 2239, 1688, 1636, 1462, 1358, 1287, 1192  $\text{cm}^{-1}$ ;  $^1\text{H NMR}$  (400 MHz,  $\text{CDCl}_3$ ):  $\delta$ , 8.50 (s, 1H), 7.98-7.91 (m, 3H), 7.89 (d,  $J = 7.7$  Hz, 1H), 7.64 (dd,  $J = 13.9, 6.8$  Hz, 1H),

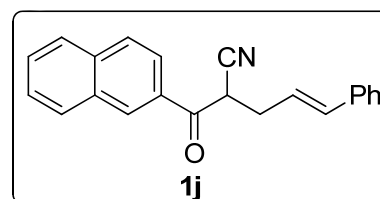

7.60-7.56 (m, 1H), 7.35 (d,  $J = 7.4$  Hz, 2H), 7.30 (t,  $J = 7.3$  Hz, 2H), 7.24 (d,  $J = 7.1$  Hz, 1H), 6.58 (d,  $J = 15.6$  Hz, 1H), 6.32-6.21 (m, 1H), 4.60 (t,  $J = 6.9$  Hz, 1H), 3.10-2.70 (m, 2H);  $^{13}\text{C NMR}$  (100 MHz,  $\text{CDCl}_3$ ):  $\delta$ , 189.9, 136.3, 136.1, 134.7, 132.3, 131.4, 131.0, 129.8, 129.5, 129.2, 128.6, 127.9, 127.3, 126.4, 123.8, 123.1, 117.0, 40.0, 33.2; **HR-MS (ESI,  $m/z$ ):**  $[\text{M} - \text{H}]^+$  calculated for  $\text{C}_{22}\text{H}_{16}\text{NO}$ : 310.1237; found: 310.1244.

**(E)-5-phenyl-2-(thiophene-2-carbonyl)pent-4-enenitrile (1k):**  $R_f = 0.18$  (10:90 = EtOAc/Hexane); colourless liquid; **IR (neat):** 2932, 2820, 2355, 2245, 1655, 1592, 1458, 1391, 1222, 1161, 1051, 1020  $\text{cm}^{-1}$ ;  $^1\text{H NMR}$  (500 MHz,  $\text{CDCl}_3$ ):  $\delta$ , 7.92 (dd,  $J = 3.9, 1.1$  Hz, 1H), 7.81 (dd,  $J = 4.9, 1.1$  Hz, 1H), 7.40-7.36 (m, 2H), 7.36-7.32 (m, 2H),

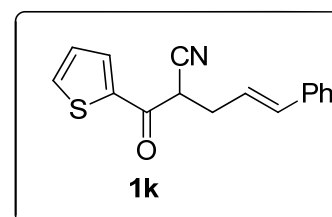

7.30-7.26 (m, 1H), 7.22 (dd,  $J = 4.9, 3.9$  Hz, 1H), 6.62 (d,  $J = 15.8$  Hz, 1H), 6.25 (dt,  $J = 15.7, 7.3$  Hz, 1H), 4.31 (dd,  $J = 7.8, 6.4$  Hz, 1H), 3.12-2.74 (m, 2H);  $^{13}\text{C NMR}$  (125 MHz,  $\text{CDCl}_3$ ):  $\delta$ , 182.7, 140.9, 136.4, 136.4, 134.9, 133.9, 128.8, 128.7, 128.0, 126.5, 123.0, 116.9, 41.0, 33.5; **HR-MS (ESI,  $m/z$ ):**  $[\text{M} - \text{H}]^+$  calculated for  $\text{C}_{16}\text{H}_{12}\text{NOS}$ : 266.0645; found: 266.0663.

**(E)-2-(furan-2-carbonyl)-5-phenylpent-4-enenitrile (1l):**  $R_f = 0.18$  (10:90 = EtOAc/Hexane); colourless liquid; **IR (neat):** 2922, 2849, 2365, 2245, 1682, 1562, 1458, 1391, 1281, 1161, 1088, 1020  $\text{cm}^{-1}$ ;  $^1\text{H NMR}$  (400 MHz,  $\text{CDCl}_3$ ):  $\delta$ , 7.66 (d,  $J = 1.0$  Hz, 1H), 7.41 (d,  $J$

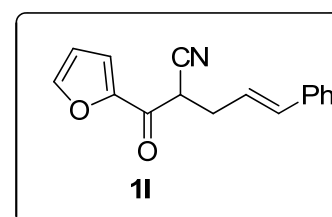

## Supporting Information I

= 3.6 Hz, 1H), 7.33 (dd,  $J = 10.9, 3.9$  Hz, 2H), 7.30–7.20 (m, 3H), 6.73–6.45 (m, 2H), 6.32 – 6.02 (m, 1H), 4.40–4.21 (m, 1H), 3.07–2.74 (m, 2H);  $^{13}\text{C}$  NMR (100 MHz,  $\text{CDCl}_3$ ):  $\delta$ , 178.6, 150.3, 147.8, 136.3, 134.8, 128.6, 127.9, 126.4, 122.9, 120.0, 116.5, 113.3, 40.3, 32.9; HR-MS (ESI,  $m/z$ ):  $[\text{M} - \text{H}]^+$  calculated for  $\text{C}_{16}\text{H}_{13}\text{NO}_2$ : 250.0874; found: 250.0868.

**(E)-2-cinnamyl-5-(4-methoxyphenyl)-3-oxopent-4-enenitrile (1m)**:  $R_f = 0.24$  (20:80 = EtOAc/Hexane); Light yellow liquid; IR (neat):

3103, 3048, 2365, 2334, 1599, 1516, 1260, 1180  $\text{cm}^{-1}$ ;  $^1\text{H}$  NMR (400 MHz,  $\text{CDCl}_3$ ):  $\delta$ , 7.74 (d,  $J = 15.7$  Hz, 1H), 7.55 (d,  $J = 8.8$  Hz, 2H), 7.35 (d,  $J = 7.2$  Hz, 2H), 7.29 (t,  $J = 7.3$  Hz, 2H), 7.26–7.21 (1H), 6.91

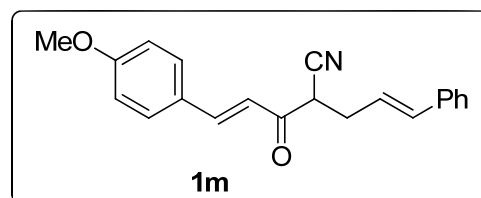

(3H), 6.58 (d,  $J = 15.7$  Hz, 1H), 6.23–6.15 (m, 1H), 3.84 (s, 3H), 3.76 (dd,  $J = 7.8, 6.0$  Hz, 1H), 2.85 (dd,  $J = 12.9, 6.4$  Hz, 2H);  $^{13}\text{C}$  NMR (100 MHz,  $\text{CDCl}_3$ ):  $\delta$ , 188.8, 162.5, 146.6, 136.4, 134.6, 130.9, 128.6, 127.8, 126.4, 126.3, 123.2, 118.7, 117.5, 114.6, 55.4, 43.2, 32.8; HR-MS (ESI,  $m/z$ ):  $[\text{M} + \text{H}]^+$  calculated for  $\text{C}_{21}\text{H}_{20}\text{NO}_2$ : 318.1494; found: 318.1477.

**(Z)-2-cinnamyl-5-hydroxy-3-oxo-5-phenylpent-4-enenitrile (1n)**:  $R_f = 0.38$  (10:90 = EtOAc/Hexane); Light yellow liquid; IR (neat): 2924, 2851,

2363, 2338, 1661, 1597, 1250  $\text{cm}^{-1}$ ;  $^1\text{H}$  NMR (400 MHz,  $\text{CDCl}_3$ ):  $\delta$ , 15.67 (s, 1H), 7.90 (d,  $J = 7.2$  Hz, 2H), 7.56 (t,  $J = 7.4$  Hz, 1H), 7.46 (t,  $J = 7.6$  Hz, 2H), 7.36 (d,  $J = 7.2$  Hz, 2H),

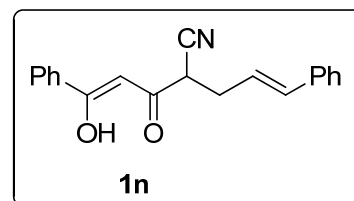

7.30 (t,  $J = 7.4$  Hz, 2H), 7.26–7.22 (1H), 6.61 (d,  $J = 15.6$  Hz, 1H), 6.53 (s, 1H), 6.26–6.15 (m, 1H), 3.65 (dd,  $J = 7.8, 5.7$  Hz, 1H), 2.94–2.70 (m, 2H);  $^{13}\text{C}$  NMR (100 MHz,  $\text{CDCl}_3$ ):  $\delta$ , 188.9, 182.7, 136.4, 134.9, 133.2, 133.2, 128.8, 128.6, 127.9, 127.3, 126.4, 122.8, 117.4, 94.6, 41.6, 33.8; HR-MS (ESI,  $m/z$ ):  $[\text{M} + \text{H}]^+$  calculated for  $\text{C}_{20}\text{H}_{18}\text{NO}_2$ : 304.1338; found: 304.1312.

**(2E,5E)-ethyl 3-cyano-2-hydroxy-6-phenylhexa-2,5-dienoate (1o)**:  $R_f = 0.28$  (10:90 = EtOAc/Hexane); Colourless solid; IR (neat): 3339, 2365, 2218,

1724, 1645, 1447, 1333, 1229, 1020, 858  $\text{cm}^{-1}$ ;  $^1\text{H}$  NMR (400 MHz,  $\text{CDCl}_3$ ):  $\delta$ , 7.35 (d,  $J = 7.2$  Hz, 2H), 7.29 (t,  $J = 7.4$  Hz, 2H), 7.22 (dd,  $J = 13.5, 6.3$  Hz, 1H), 6.95 (s, 1H), 6.55 (d,  $J =$

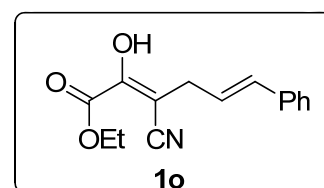

15.6 Hz, 1H), 6.22–6.14 (m, 1H), 4.45 (q,  $J = 7.1$  Hz, 2H), 3.27 (dd,  $J = 7.0, 1.1$  Hz, 2H), 1.43 (t,  $J = 7.1$  Hz, 3H);  $^{13}\text{C}$  NMR (100 MHz,  $\text{CDCl}_3$ ):  $\delta$ , 162.3, 149.4, 136.7, 133.4, 128.5,

## Supporting Information I

127.6, 126.3, 122.9, 117.3, 95.7, 64.4, 32.1, 13.9; **HR-MS (ESI,  $m/z$ ):**  $[M + H]^+$  calculated for  $C_{15}H_{16}NO_3$ : 258.1130; found: 258.1127.

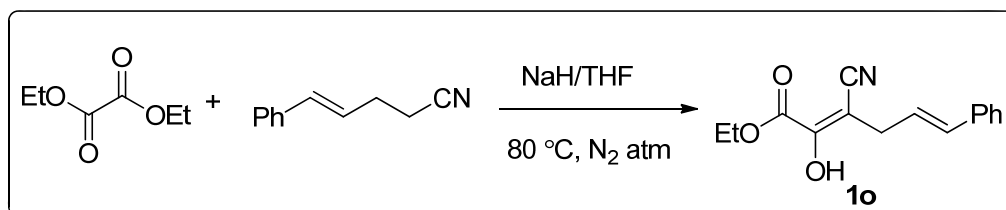

A solution of aliphatic nitrile (3 mmol) in THF (5 mL) was treated with Diethyloxalate (1 mmol), then sodium hydride (3 mmol, 60%) was added. The reaction mixture was refluxed (12-16 hr) until TLC indicated the total consumption of the ester. After cooling, the mixture was treated with ice-water (5 mL), acidified with 2 N HCl (to pH 2~3) and extracted with EA (10 mL x 3). The combined organic layer was dried over sodium sulfate and evaporated under reduced pressure to remove the solvent. The given residue was purified by column chromatography using a mixture of PE and EA as eluent to afford corresponding ketonitrile in 27% yield.

Compound **1p**<sup>6</sup>, **1q**-**1r**<sup>8</sup>, **1s**<sup>9</sup>, **1t**<sup>10</sup>, **1u**<sup>11</sup> were prepared using following reported procedure.

**(E)-2-isobutyryl-5-(4-methoxyphenyl)pent-4-enitrile (2a):**  $R_f = 0.50$  (20:80 = EtOAc/Hexane); Colourless solid; **IR (neat):** 2995, 2932, 2371, 2239, 1724, 1609, 1458, 1254, 1180, 1024, 968  $cm^{-1}$ ; **<sup>1</sup>H NMR (400 MHz, CDCl<sub>3</sub>):**  $\delta$ , 7.27 (d,  $J = 8.4$  Hz, 2H), 6.83 (d,  $J = 8.8$  Hz, 2H), 6.48 (d,  $J = 15.6$  Hz, 1H), 6.02-5.95 (m, 1H), 3.78 (s, 3H), 3.62 (dd,  $J = 7.5, 6.1$  Hz, 1H), 3.03-2.96 (m, 1H), 2.78-2.70 (m, 2H), 1.17 (d,  $J = 2.8$  Hz, 3H), 1.15 (d,  $J = 2.4$  Hz, 3H); **<sup>13</sup>C NMR (100 MHz, CDCl<sub>3</sub>):**  $\delta$ , 204.1, 159.4, 134.1, 129.1, 127.5, 120.7, 117.2, 114.0, 55.3, 42.4, 39.9, 32.5, 18.3, 18.0; **HR-MS (ESI,  $m/z$ ):**  $[M - H]^+$  calculated for  $C_{16}H_{18}NO_2$ : 256.1343; found: 256.1321.

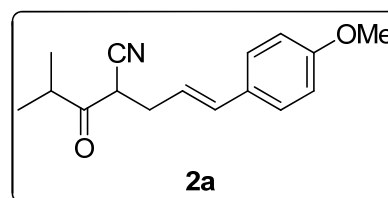

**(E)-2-isobutyryl-5-(p-tolyl)pent-4-enitrile (2b):**  $R_f = 0.33$  (05:95 = EtOAc/Hexane); Colourless liquid; **IR (neat):** 2974, 2916, 2371, 2245, 2214, 1728, 1630, 1520, 1458, 1265, 1082  $cm^{-1}$ ; **<sup>1</sup>H NMR (400 MHz, CDCl<sub>3</sub>):**  $\delta$ , 7.23 (d,  $J = 8.4$  Hz, 2H), 7.11 (d,  $J = 8.0$  Hz, 2H), 6.51 (d,  $J = 15.6$  Hz, 1H), 6.14-6.01 (m, 1H), 3.62 (dd,  $J = 7.5, 6.1$  Hz, 1H), 3.05-2.98 (m, 1H), 2.79-2.70 (m, 2H), 2.32 (s, 3H), 1.18 (d,  $J = 3.6$  Hz, 3H), 1.16 (d,  $J = 3.6$  Hz, 3H); **<sup>13</sup>C NMR (100 MHz, CDCl<sub>3</sub>):**  $\delta$ , 204.1, 137.7, 134.6,

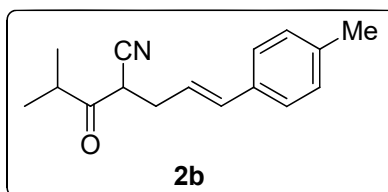

## Supporting Information I

133.6, 129.3, 126.3, 121.9, 117.2, 42.3, 39.9, 32.4, 21.2, 18.3, 18.0; **HR-MS (ESI,  $m/z$ ):**  $[M - H]^+$  calculated for  $C_{16}H_{18}NO$ : 240.1394; found: 240.1396.

**(E)-2-isobutyryl-5-(naphthalen-2-yl)pent-4-enitrile (2c):**  $R_f = 0.20(05:95 =$

EtOAc/Hexane); Light yellow solid; **IR (neat):** 3057, 2980, 2928, 2359, 2245, 1724, 1636, 1593, 1468, 1379, 1275, 1186, 1097  $cm^{-1}$ ;  **$^1H$  NMR (400 MHz,  $CDCl_3$ ):**  $\delta$ , 7.80-7.64 (m, 3H), 7.70 (s, 1H), 7.55 (d,  $J = 9.3$  Hz, 1H), 7.48-

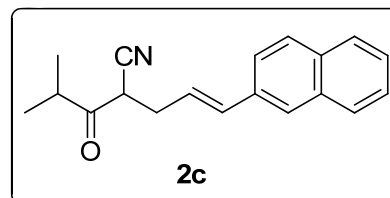

7.42 (m, 2H), 6.71 (d,  $J = 15.6$  Hz, 1H), 6.33-6.19 (m, 1H), 3.66 (dd,  $J = 7.5, 6.1$  Hz, 1H), 3.06-2.99 (m, 1H), 2.85-2.76 (m, 2H), 1.20 (d,  $J = 2.8$  Hz, 3H), 1.18 (d,  $J = 2.8$  Hz, 3H);  **$^{13}C$  NMR (100 MHz,  $CDCl_3$ ):**  $\delta$ , 204.0, 134.9, 133.7, 133.5, 133.1, 128.3, 128.0, 127.6, 126.4, 126.3, 126.0, 123.3, 123.3, 117.2, 42.2, 39.9, 32.5, 18.3, 18.0; **HR-MS (ESI,  $m/z$ ):**  $[M - H]^+$  calculated for  $C_{19}H_{18}NO$ : 276.1394; found: 276.1391.

**(Z)-2-isobutyryl-4,5-diphenylpent-4-enitrile (2d):**  $R_f = 0.28$  (5:95 = EtOAc/Hexane);

Colourless liquid; **IR (neat):** 3058, 3030, 2925, 2878, 2499, 2253, 2210, 1699, 1455, 1265, 1078, 1026  $cm^{-1}$ ;  **$^1H$  NMR (400 MHz,  $CDCl_3$ ):**  $\delta$ , 7.32 (3H), 7.18 (dd,  $J = 7.6, 1.7$  Hz, 2H), 7.11-7.07 (3H), 6.94 (dd,  $J = 6.6, 2.9$  Hz, 2H), 6.64 (s, 1H), 3.43 (dd,  $J = 9.5,$

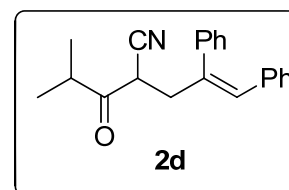

5.6 Hz, 1H), 3.17 (ddd,  $J = 14.1, 5.6, 1.0$  Hz, 1H), 2.97-2.83 (m, 2H), 1.11 (d,  $J = 6.8$  Hz, 3H), 1.08 (d,  $J = 6.9$  Hz, 3H);  **$^{13}C$  NMR (100 MHz,  $CDCl_3$ ):**  $\delta$ , 204.2, 138.2, 136.3, 136.1, 130.9, 129.2, 129.1, 128.8, 127.99, 127.96, 127.0, 117.0, 40.8, 39.9, 39.7, 18.3, 18.1; **HR-MS (ESI,  $m/z$ ):**  $[M + H]^+$  calculated for  $C_{21}H_{22}NO$ : 304.1701; found; 304.1654.

Compound **2e** and **2f** were prepared using following reported procedure.<sup>2,7</sup>

## 6. Reference:

1. J. O. Guevara-Pulido, J. M. Andrés and R. Pedrosa, *Eur. J. Org. Chem.* 2014, 8072.
2. N. Kim Son, P. Raoul and M. Yves, *Bulletin de la Societe Chimique de France* 1974, 3-4, 471-4.
3. Yang, Xianghua et .al. *Org. Biomol. Chem.* 2012, **10**, 852.
4.  $\beta$ -Keto-Nitriles prepared using reported procedures: (a) W. Q. Yu, Y. F. Du and K. Zhao, *Org. Lett.* 2009, **11**, 2417; (b) J. Shen, D. Yang, Y. Liu, S. Qin, J. Zhang, J. Sun, C. Liu, C. Liu, X. Zhao, C. Chu and R. Liu, *Org. Lett.* 2014, **16**, 350; (c) Y. Ji, W.



## Supporting Information I

- C. Trenkle and J. V. Vowles, *Org. Lett.* 2006, **8**, 1161; (d) L. Johnson, J. Powers, F. Ma, K. Jendza, B. Wang, E. Meredith and N. Mainolfi, *Synthesis* 2013, **45**, 0171.
5. Y. Jiang, C.-M. Park and T.-P. Loh, *Org. Lett.* 2014, **16**, 3432.
  6. G. Dickmeiss, K. L. Jensen, D. Worgull, P. T. Franke and K. A. Jørgensen, *Angew. Chem., Int. Ed.* 2011, **50**, 1580.
  7. M.-B. Li, H. Li, J. Wang, C.-R. Liu and S.-K. Tian, *Chem. Commun.* 2013, **49**, 8190.
  8. M. D. Bachi and D. G. Lasanow, *Synlett* 1990, **9**, 551.
  9. R. Nallagonda, R. R. Reddy and P. Ghorai, *Chem. Eur. J.* 2015, **21**, 14732.
  10. N. T. Vikas, N. P. Kavitha, S. K. Harish and K. C. Hemchandra, *Tetrahedron Lett.* 2008, **49**, 2213.
  11. J. Wang, Y. Masui and M. Onaka, *ACS Catal.*, 2011, **5**, 446.

## checkCIF/PLATON report

You have not supplied any structure factors. As a result the full set of tests cannot be run.

THIS REPORT IS FOR GUIDANCE ONLY. IF USED AS PART OF A REVIEW PROCEDURE FOR PUBLICATION, IT SHOULD NOT REPLACE THE EXPERTISE OF AN EXPERIENCED CRYSTALLOGRAPHIC REFEREE.

No syntax errors found.      CIF dictionary      Interpreting this report

### Datablock: TRYA1\_a

---

Bond precision:    C-C = 0.0014 A

Wavelength=0.71073

Cell:                a=7.4180(1)                b=7.5529(1)                c=10.9647(2)  
                      alpha=80.836(1)            beta=86.503(1)            gamma=84.074(1)  
Temperature:        296 K

|                | Calculated   | Reported     |
|----------------|--------------|--------------|
| Volume         | 602.621(16)  | 602.621(16)  |
| Space group    | P -1         | P -1         |
| Hall group     | -P 1         | -P 1         |
| Moiety formula | C16 H11 N O2 | ?            |
| Sum formula    | C16 H11 N O2 | C16 H11 N O2 |
| Mr             | 249.26       | 249.26       |
| Dx,g cm-3      | 1.374        | 1.374        |
| Z              | 2            | 2            |
| Mu (mm-1)      | 0.091        | 0.091        |
| F000           | 260.0        | 260.0        |
| F000'          | 260.12       |              |
| h,k,lmax       | 10,10,15     | 10,10,15     |
| Nref           | 3618         | 3589         |
| Tmin,Tmax      | 0.988,0.992  |              |
| Tmin'          | 0.986        |              |

Correction method= Not given

Data completeness= 0.992

Theta(max)= 30.267

R(reflections)= 0.0430( 3102)

wR2(reflections)= 0.1481( 3589)

S = 1.147

Npar= 172

---

The following ALERTS were generated. Each ALERT has the format

**test-name\_ALERT\_alert-type\_alert-level.**

Click on the hyperlinks for more details of the test.

---

## ● Alert level G

```
PLAT154_ALERT_1_G The su's on the Cell Angles are Equal ..... 0.00100 Degree
PLAT230_ALERT_2_G Hirshfeld Test Diff for C005 -- C00C .. 6.5 su
PLAT720_ALERT_4_G Number of Unusual/Non-Standard Labels ..... 30 Note
```

---

0 **ALERT level A** = Most likely a serious problem - resolve or explain  
0 **ALERT level B** = A potentially serious problem, consider carefully  
0 **ALERT level C** = Check. Ensure it is not caused by an omission or oversight  
3 **ALERT level G** = General information/check it is not something unexpected

1 ALERT type 1 CIF construction/syntax error, inconsistent or missing data  
1 ALERT type 2 Indicator that the structure model may be wrong or deficient  
0 ALERT type 3 Indicator that the structure quality may be low  
1 ALERT type 4 Improvement, methodology, query or suggestion  
0 ALERT type 5 Informative message, check

---

It is advisable to attempt to resolve as many as possible of the alerts in all categories. Often the minor alerts point to easily fixed oversights, errors and omissions in your CIF or refinement strategy, so attention to these fine details can be worthwhile. In order to resolve some of the more serious problems it may be necessary to carry out additional measurements or structure refinements. However, the purpose of your study may justify the reported deviations and the more serious of these should normally be commented upon in the discussion or experimental section of a paper or in the "special\_details" fields of the CIF. checkCIF was carefully designed to identify outliers and unusual parameters, but every test has its limitations and alerts that are not important in a particular case may appear. Conversely, the absence of alerts does not guarantee there are no aspects of the results needing attention. It is up to the individual to critically assess their own results and, if necessary, seek expert advice.

### **Publication of your CIF in IUCr journals**

A basic structural check has been run on your CIF. These basic checks will be run on all CIFs submitted for publication in IUCr journals (*Acta Crystallographica*, *Journal of Applied Crystallography*, *Journal of Synchrotron Radiation*); however, if you intend to submit to *Acta Crystallographica Section C* or *E*, you should make sure that full publication checks are run on the final version of your CIF prior to submission.

### **Publication of your CIF in other journals**

Please refer to the *Notes for Authors* of the relevant journal for any special instructions relating to CIF submission.

---

**PLATON version of 21/06/2015; check.def file version of 21/06/2015**
